# Supplementary material for: Converting Redox Signaling to Apoptotic Activities by Stress-Responsive Regulators HSF1 and NRF2 in Fenretinide Treated Cancer Cells
Source: PLoS One. 2009 Oct 21;4(10):e7538. doi: 10.1371/journal.pone.0007538 (PMC2760443; doi:10.1371/journal.pone.0007538)
Supplement: Data S1 — Gene expression matrix (3,345×23) identified by SOM-SVD and analyzed by CPP-SOM in fenretinide-induced apoptosis of NB4 cells. (2.03 MB XLS) [file pone.0007538.s007.xls]

## Sheet: Supplementary Data 1
Supplementary Data 1. Gene expression matrix (3,345 X 23) identified by SOM-SVD and analyzed by CPP-SOM in fenretinide-induced apoptosis of NB4 cells
SBCID	Symbol	Name	ACCN	Entrez Gene	Neuron Index (50 in all)	Group Index (6 in all)	con 0h	con 8h	con 12h	con 15h	0.25h	0.5h	1h	2h	4h	6h	8h	10h	12h	15h	18h	21h	24h	30h	36h	42h	48h	54h	60h
SHR020060010D02	BCL2	B-cell CLL/lymphoma 2	NM_000633	596	1	1	-0.118836	-0.230862	-0.296982	-0.358687	-0.329308	-0.344959	-0.326315	-0.681824	-0.039801	-0.409949	-0.169925	-0.404066	-0.553184	-0.924311	-0.797013	-1.26163	-0.620586	-0.725493	-0.686202	-0.485427	-0.825502	-0.826352	-0.84284
HUXP1029F08	BNIP3	BCL2/adenovirus E1B 19kDa interacting protein 3	NM_004052	664	1	1	-0.198071	-0.984047	-0.678342	-1	-0.607493	-0.569923	-0.619091	-0.558611	-0.772317	-1	-0.918222	-0.857186	-1.21254	-1.28461	-1.09332	-1.33613	-1.28037	-0.842644	-1.3207	-1.18342	-1.53903	-1.69211	-1.45815
SHR020060006C07	FBN2	fibrillin 2 (congenital contractural arachnodactyly)	NM_001999	2201	1	1	-0.38443	-0.65153	-0.383605	-0.385025	-0.655501	-0.42711	-0.327927	-0.679427	-0.36257	-0.733139	-0.68966	-0.568843	-0.846049	-0.738352	-0.891359	-1.11844	-0.824428	-0.694497	-0.721574	-0.669851	-0.705553	-0.66617	-0.80122
SHR020061024H06	HK2	hexokinase 2	NM_000189	3099	1	1	0.0312336	-0.423049	-0.526537	-0.592027	-0.310642	-0.185528	-0.170891	-0.397574	-0.642702	-0.670276	-0.508648	-0.701189	-0.899598	-1.00817	-1.14981	-1.34004	-1.36923	-1.16319	-0.793485	-0.68522	-0.875584	-0.840032	-0.845207
HUXP1042B01	MXI1	MAX interactor 1	NM_001008541	4601	1	1	-0.21042	-0.542188	-0.199938	-0.329417	0.163976	0.0206595	-0.0733732	0.0117293	-0.412647	-0.286304	-0.678072	-0.695666	-1.01245	-1.19931	-0.786596	-0.987927	-0.63743	-0.530515	-0.842171	-0.406159	-0.874469	-0.338525	-0.89242
HUXP1045A04	MYC	v-myc myelocytomatosis viral oncogene homolog (avian)	NM_002467	4609	1	1	-0.0773618	-0.184259	-0.559359	-0.515726	-0.104964	-0.209517	-0.314411	-0.284247	-0.331156	-0.394036	-0.341937	-0.340319	-0.444231	-1.08874	-0.977187	-1.46942	-1.08529	-0.79684	-0.78146	-0.556565	-1.00595	-0.917438	-0.811335
HUXP1083F03	PTPRN2	protein tyrosine phosphatase, receptor type, N polypeptide 2	NM_002847	5799	1	1	0.0331669	-0.591915	-0.374066	-0.670692	-0.267933	-0.205399	-0.192061	-0.572047	-0.617384	-0.673667	-0.70044	-0.759737	-0.885907	-1.03206	-0.940294	-1.01106	-1.04474	-0.530515	-0.572299	-0.426733	-0.438496	-0.22115	-0.28866
HUXP1128E12	RNASE2	ribonuclease, RNase A family, 2 (liver, eosinophil-derived neurotoxin)	NM_002934	6036	1	1	-0.303957	-0.442846	-0.453628	-0.43693	-0.371493	-0.288286	-0.363805	-0.390567	-0.45631	-0.478854	-0.69063	-0.727797	-0.930596	-1.1268	-1.25747	-1.40639	-1.42477	-0.716775	-0.682099	-0.272285	-0.212666	-0.228959	-0.0971733
SHR020061016D03	SLC4A3	solute carrier family 4, anion exchanger, member 3	NM_201574	6508	1	1	-0.280901	-0.37707	-0.397147	-0.712198	-0.387993	-0.342106	-0.312169	-0.360882	-0.164387	-0.36257	-0.0358452	-0.641546	-0.523186	-0.584963	-1.12199	-0.92785	-1.1375	-0.837943	-1.03103	-0.862496	-0.975197	-0.565979	-0.566202
HUXP1165D09	SORL1	sortilin-related receptor, L(DLR class) A repeats-containing	NM_003105	6653	1	1	-0.165249	-0.440906	-0.275634	-0.488231	-0.342166	-0.267812	-0.387816	-0.388271	-0.608232	-0.654225	-0.61471	-0.950247	-0.974005	-1.16008	-1.38376	-1.48256	-1.61173	-1.36088	-1.32318	-1.03775	-1.0608	-1.05358	-0.970513
HUXP1170D11	UGCG	UDP-glucose ceramide glucosyltransferase	AJ420423	7357	1	1	-0.0630098	-0.48375	-0.272655	-0.587284	-0.357552	-0.307429	-0.645891	-0.837943	-0.411978	-0.438442	-0.328623	-0.539026	-0.78799	-1	-1.03562	-1.09464	NaN	NaN	-0.964376	-0.665882	-0.767554	-1.16993	-0.812576
SHR020061003A04	TRIM24	tripartite motif-containing 24	NM_015905	8805	1	1	-0.432959	-0.400916	-0.345135	-0.70044	-0.39502	-0.378512	-0.222392	-0.398084	-0.464668	-0.453718	-0.511899	-0.510195	-0.752072	-0.534174	-0.659345	-1.09592	-0.472488	NaN	-0.718088	-0.663717	-0.916477	-1.05889	-0.765044
HUXP1073H03	C5orf13	chromosome 5 open reading frame 13	NM_004772	9315	1	1	-0.247727	-0.252871	-0.177459	-0.204618	-0.298658	-0.265097	-0.24815	-0.193195	-0.418468	-0.288431	-0.449803	-0.591608	-0.633461	-0.78046	-1.01718	-1.25601	-0.872083	-0.809778	-0.81724	-0.959984	-1.07866	-0.685566	-1.1356
HUXP1072A08	SNX10	sorting nexin 10	NM_013322	29887	1	1	-0.39814	-0.609234	-0.213381	-0.468353	-0.476965	-0.349098	-0.405485	-0.397004	-0.466085	-0.601836	-0.640611	-0.714872	-0.685948	-0.881653	-0.929331	-0.939535	-0.897012	-0.722466	-0.875953	-0.624855	-0.697466	-0.574393	-0.515906
SHR020061032F07	ISG20L2	interferon stimulated exonuclease gene 20kDa-like 2	Hs.301904	81875	1	1	-0.391425	-0.0933326	-0.349859	-0.324272	-0.221492	-0.304393	-0.141661	-0.525723	-0.302029	-0.161234	-0.210946	-0.523186	-0.696608	-0.612396	-0.746243	-0.922417	-0.776104	-0.966053	-0.896321	-0.624901	-0.912537	-0.675475	-0.440573
SHR020060002E12	CCND1	cyclin D1	NM_053056	595	2	1	0.190016	-0.161967	-0.160465	NaN	0.23349	-0.0144996	0.154171	NaN	-0.268703	-0.810623	-0.791683	NaN	-0.877744	-1.158	-1.18793	-0.946061	-0.847997	NaN	-0.794971	-0.195724	NaN	0.19513	-0.113956
HUXP1207C12	CEBPD	CCAAT/enhancer binding protein (C/EBP), delta	NM_005195	1052	2	1	0.0120953	-0.398971	-0.365674	-0.664985	-0.246261	-0.449881	-0.528069	-0.799027	-0.664816	-0.602858	-0.772302	-0.660514	-0.704581	-1.22716	-1.00868	-0.972441	-1.25474	-0.327599	-0.102322	0.0891311	-0.0862738	-0.125241	-0.289373
HUXP1021G02	CHML	choroideremia-like (Rab escort protein 2)	NM_014322	1122	2	1	-0.176878	-0.603883	-0.288057	-0.493989	-0.188857	-0.209453	-0.236067	-0.449526	-0.371256	-0.465292	-0.544321	-0.666757	-0.60168	-0.847997	-0.584963	-0.762057	NaN	NaN	-0.524885	-0.0327899	-0.240561	-0.356144	-0.410346
SHR020060007E02	GM2A	GM2 ganglioside activator	NM_000405	2760	2	1	-0.131245	-0.235175	-0.288188	-0.43758	0.278976	-0.0649554	-0.203284	-0.304257	NaN	-0.448053	-0.465123	-0.666757	-0.759641	-0.626439	-0.632268	-0.889977	NaN	-0.498251	-0.417196	-0.165851	0.274033	0.0995357	0.647458
HUXP1043A09	SERPINF1	serpin peptidase inhibitor, clade F (alpha-2 antiplasmin, pigment epithelium derived factor), member 1	NM_002615	5176	2	1	-0.037153	-0.391687	-0.180572	-0.402883	-0.239951	0.0114048	-0.00749454	-0.217231	-0.263034	-0.39899	-0.520832	-0.459432	-0.389042	-0.666956	NaN	-0.5559	NaN	NaN	-0.266939	-0.247928	-0.0262315	NaN	0.0565835
HUXP1020H11	PRG1	proteoglycan 1, secretory granule	NM_002727	5552	2	1	-0.204952	-0.196305	-0.192119	-0.468025	-0.299732	-0.260848	-0.345853	-0.250371	-0.23926	-0.360077	-0.452517	-0.0359238	-0.429601	-0.56918	-0.444344	-0.89418	-0.551184	-0.366036	-0.418069	0.235435	-0.120299	0.236702	0.389877
HUXP1069E04	SRP9	signal recognition particle 9kDa	NM_003133	6726	2	1	0.349746	-0.814968	-0.291766	-0.397655	0.152952	0.0439433	0.0717015	0.0212165	-0.200533	-0.535596	-0.596935	-0.498251	-0.986703	-1.24304	-1.20532	-0.602665	-0.726239	-0.348895	-0.463132	-0.328623	-0.247928	-0.593375	-0.696608
SHR020061004D12	VEGFB	vascular endothelial growth factor B	NM_003377	7423	2	1	0.0535155	-0.552074	-0.29626	-0.375039	-0.158904	-0.158095	-0.0261975	-0.432959	-0.488101	-0.358687	-0.43557	-0.582332	-0.662182	-0.441649	-0.334639	-0.171254	-0.992544	-0.474539	-0.320787	0.34606	0.112629	0.257158	0.288457
SHR020060008E05	WAS	Wiskott-Aldrich syndrome (eczema-thrombocytopenia)	NM_000377	7454	2	1	-0.158366	-0.401688	-0.306427	-0.662965	-0.372659	-0.259292	-0.0295443	-0.491612	-0.432959	-0.543443	-0.313935	-0.887525	-0.885007	-0.756849	-0.608421	-0.727185	-0.827819	NaN	0.0583642	0.287981	0.321928	0.463947	0.160773
HUXP1076H10	GCS1	glucosidase I	NM_006302	7841	2	1	-0.0392891	-0.217805	-0.104626	0.0553101	-0.256181	-0.262178	-0.299953	-0.224844	-0.251732	-0.369017	-0.450084	-0.419698	-0.506865	-0.60921	-0.590717	-0.325967	-0.863221	-0.60224	-0.546157	0.0289338	-0.226276	0.182747	-0.171953
HUXP1018G02	IFITM1	interferon induced transmembrane protein 1 (9-27)	NM_003641	8519	2	1	-0.0559197	-0.33128	-0.452028	-0.278578	-0.0624959	-0.139787	-0.145602	-0.296804	-0.159657	-0.335929	-0.415877	-0.764461	-0.630804	-0.720776	-0.885036	-0.751117	-0.90322	-0.341602	-0.444103	-0.131619	0.295694	0.469697	0.203495
SHR020060020A12	KBTBD11	kelch repeat and BTB (POZ) domain containing 11	NM_014867	9920	2	1	-0.0746388	-0.765324	-0.493539	-0.368178	-0.263034	-0.184425	-0.19376	-0.332404	-0.508697	-0.911191	-0.793549	-0.8314	-0.869639	-0.912429	-0.925668	-0.923466	-0.866375	-0.413076	-0.343205	0.0629774	-0.0480943	0.0856713	0.116514
HUXP1014A04	IKZF1	IKAROS family zinc finger 1 (Ikaros)	NM_006060	10320	2	1	0.105103	0.00432121	-0.616077	-0.343954	0.0193244	0.0161335	-0.128297	-0.30871	0.0874628	-0.178092	-0.407971	-0.997168	-0.88158	-1.0244	-1.03921	-0.557741	-0.939975	0.190653	0.384198	0.324602	0.492431	0.260236	0.0546735
HUXP1132H07	IFITM3	interferon induced transmembrane protein 3 (1-8U)	NM_021034	10410	2	1	0.0939402	-0.072814	-0.00288395	-0.316555	0.00423492	-0.00438643	-0.0677497	-0.203177	-0.0310269	-0.184223	-0.329856	-0.391779	-0.433167	-0.466771	-0.810654	-0.854639	-0.903901	-0.468939	-0.42472	0.0730218	-0.028588	0.0244342	0.187314
HUXP1121F07	IFITM2	interferon induced transmembrane protein 2 (1-8D)	NM_006435	10581	2	1	-0.151497	-0.244963	-0.31312	-0.272661	-0.152607	-0.187965	-0.252072	-0.103727	-0.278924	-0.340975	-0.464954	-0.533954	-0.51408	-0.703904	-0.715489	-0.630669	-0.700257	-0.380384	-0.355582	-0.27944	-0.0851719	0.0369319	-0.113467
HUXP1118D02	TNFSF13B	tumor necrosis factor (ligand) superfamily, member 13b	NM_006573	10673	2	1	-0.0318087	-0.647292	-0.0621055	-0.375509	-0.263962	-0.161463	-0.130584	-0.112964	-0.0860398	-0.598749	-0.510324	-0.324525	-0.663205	-0.678072	-0.587647	-0.650354	-0.55141	0.177998	-0.0707345	0.109011	-0.0374747	0.125531	0.318985
HUXP1035E10	ANKRD15	ankyrin repeat domain 15	NM_015158	23189	2	1	0.0545689	-0.178019	-0.0516328	-0.104143	-0.0575063	-0.25537	-0.291709	-0.813988	-0.43664	-0.355022	-0.319618	-0.486184	-0.61839	-0.634388	-0.454484	-0.669221	-0.784832	-0.0848889	0	-0.0817431	0.0565835	-0.3349	-0.198307
SHR020061021C05	DEF6	differentially expressed in FDCP 6 homolog (mouse)	NM_022047	50619	2	1	0.138076	-0.410047	-0.0412964	-0.157386	-0.140863	-0.0135465	0.00371829	0.281326	-0.222392	-0.325272	-0.53016	-1	-0.637063	-0.665683	-0.791814	-0.543867	-1.05199	-0.476028	-0.421995	-0.0545689	0.244622	0.296856	-0.100305
HUXP1113D04	FAM46A	family with sequence similarity 46, member A	NM_017633	55603	2	1	-0.0403577	0.148787	-0.341331	-0.470482	-0.105809	-0.206745	-0.339549	-0.557016	-0.534412	-0.303952	-0.19524	-0.562361	-0.929798	-1.12635	-1.30142	-1.13366	-1.16115	-0.601155	-0.0820047	0.323971	0.34438	0.0869421	0.303452
HUXP1004H03	SLC39A10	solute carrier family 39 (zinc transporter), member 10	NM_020342	57181	2	1	-0.498251	-0.615287	-0.177787	-0.348337	-0.347923	-0.114072	-0.187086	-0.727567	NaN	NaN	-0.453718	-0.400538	-1.19555	-1.21901	-0.754888	-0.649814	-0.523562	-0.187933	-0.398164	0.129283	-0.570688	-0.216492	-0.486399
HUXP1122G08	CG018	hypothetical gene CG018	NM_052818	90634	2	1	-0.265239	-0.391637	-0.442143	-0.0880562	-0.120899	-0.261198	-0.409391	-0.678072	-0.569696	-0.523562	-0.259387	-0.18117	-0.462972	-0.638326	-0.603883	-0.669851	-0.67084	-0.278301	-0.26748	0.219057	-0.0637759	-0.0410273	-0.212849
HUXP1188F12	SYNPO2	synaptopodin 2	NM_133477	171024	2	1	-0.172837	-0.426265	-0.491248	-0.260236	-0.336691	-0.114936	-0.14828	-0.252274	NaN	-0.529109	-0.253553	-0.288345	-0.78182	-1.03263	-0.562936	-1.14594	NaN	0.536053	-0.350186	-0.177998	-0.0641303	0.162553	-0.306185
HUXP1101B12	JAZF1	JAZF zinc finger 1	NM_175061	221895	2	1	-0.0703893	-0.209096	-0.267622	0.0386805	-0.138828	0.0565835	-0.183122	-0.349008	-0.364572	-0.305626	-0.319279	-0.349008	-0.519609	-0.606989	NaN	-0.512885	NaN	NaN	-0.0428131	-0.106915	-0.0610756	NaN	-0.0731664
HUXP1047A10	AK3L1	adenylate kinase 3-like 1	NM_013410	205	3	1	0.111989	0.0138058	-0.211976	0.028151	0.305503	0.0931094	0.233797	0.378512	0.370715	0.198904	0.116193	-0.282143	-0.561427	-0.665581	-0.827819	-0.955262	-0.593375	-0.829014	-1.05153	-0.628031	-0.263034	-0.121015	-0.237039
HUXP1151B11	ALB	albumin	NM_000477	213	3	1	-0.0367863	0.357194	0.0758779	0.133541	0.207165	0.191906	0.0442347	0.328422	0.0469299	0.178809	0.0590492	-0.330835	0.0474175	-0.379354	-0.693936	-0.857427	-0.353023	-0.826333	-0.535827	-0.664274	-0.170742	-0.130061	0.0733933
SHR020061023F07	ARL2	ADP-ribosylation factor-like 2	NM_001667	402	3	1	0.284303	-0.0768936	0.156869	0.0965269	0.0874628	0.0627358	0.170635	0.047653	-0.0572249	-0.258859	-0.616671	-1.06609	-0.306171	-0.577429	-0.757209	-0.685566	-1.16294	-0.786596	-1.42626	-0.639302	0.149378	0.487187	-0.366128
HUXP1175F05	COL2A1	collagen, type II, alpha 1 (primary osteoarthritis, spondyloepiphyseal dysplasia, congenital)	NM_001844	1280	3	1	0.10257	0.0187366	-0.200782	-0.238611	0.214505	NaN	-0.0290485	-0.0773057	0.0327899	-0.176878	-0.383915	-0.0771679	-0.329308	-0.476028	-0.652077	-0.613942	NaN	NaN	-1.01394	-0.70044	NaN	NaN	-0.70044
SHR020061030D06	CTSG	cathepsin G	NM_001911	1511	3	1	0.294827	0.492846	0.415635	0.42342	0.522391	0.386046	0.392065	0.281618	0.491705	0.359542	0.159336	0.0636947	0.241762	0.0010353	-0.475733	-0.546457	-0.646868	-1.45199	-1.39378	-1.48975	-0.954396	-0.685833	-0.783521
SHR020061026C05	DPH2	DPH2 homolog (S. cerevisiae)	NM_001384	1802	3	1	-0.339089	0.064653	0.0706767	NaN	0.118941	0.0458037	0.0141211	-0.584963	-0.222392	-0.217591	-0.0753653	-0.837943	-0.505736	-0.561558	-0.902074	-1.00765	-1.01792	NaN	-0.784022	-0.4212	NaN	-0.227069	-0.54463
HUXP1132G05	EIF1AX	eukaryotic translation initiation factor 1A, X-linked	NM_001412	1964	3	1	-0.247798	0.0577467	-0.209013	-0.270897	0.00557026	0.138311	0.279988	0.0381046	0.333987	0.072945	-0.0614005	-0.449727	-0.46909	-0.644634	-0.741381	-1.07008	-0.960626	-0.593474	-0.4885	-0.345619	-0.0782039	-0.20304	-0.185718
HUXP1200F03	IGFBP4	insulin-like growth factor binding protein 4	NM_001552	3487	3	1	0.246256	0.191594	0.346852	0.292086	0.364818	0.260628	0.411367	0.362338	0.271872	0.230475	-0.140102	-0.454065	-0.0632308	-0.396243	-0.695972	-0.465877	-1.3801	-0.880993	-1.00271	-0.919602	-0.383329	-0.624214	-1.10566
HUXP1156D10	IGLL1	immunoglobulin lambda-like polypeptide 1	NM_020070	3543	3	1	0.0644167	0.0682086	-0.102299	-0.0734622	0.0980643	0.188304	0.190184	0.297998	-0.13801	-0.141615	-0.147276	-0.204497	-0.284208	-0.466021	-0.826732	-0.807355	-0.891624	-0.869296	-0.732259	-0.465887	-0.512951	-0.361739	-0.499274
HUXP1210A11	MPO	myeloperoxidase	NM_000250	4353	3	1	0.145101	0.407175	0.124721	0.167081	0.0531801	-0.0171012	-0.0240153	0.0946544	0.0607876	-0.15502	-0.150716	-0.343374	0.00969591	-0.296222	-0.748736	-0.925529	-1.03744	-1.03299	-1.11221	-0.750251	-0.470228	-0.394831	-0.189804
HUXP1090E06	MT1X	metallothionein 1X	NM_005952	4501	3	1	-0.0104112	0.330425	0.052506	0.0437368	0.133874	0.1092	0.0993874	0.233045	0.29205	0.17184	0.169611	-0.213836	0.341215	-0.225578	-0.648866	-0.894314	-0.471028	-0.985525	-0.444666	-0.65449	-0.437405	-0.297992	-0.366663
HUXP1108E08	MT2A	metallothionein 2A	V00594	4502	3	1	-0.0889191	0.201458	0.165533	0.01825	0.092007	0.0489096	0.144809	0.140582	0.154377	0.093215	-0.0125061	-0.420346	-0.0194796	-0.430287	-0.695145	-0.931851	-0.337708	-0.820546	-0.621858	-0.611606	-0.0134626	-0.0912563	-0.153006
SHR020061010E01	PCYT2	phosphate cytidylyltransferase 2, ethanolamine	NM_002861	5833	3	1	0.154723	0.0100072	0.0916305	-0.0557633	-0.0855181	-0.0384741	0.0879071	0.193942	-0.0170735	-0.243114	-0.245756	-0.805272	-0.200533	-0.603647	-0.643856	-0.90526	NaN	-0.523562	-0.800328	-0.554312	0.0708835	NaN	-0.356694
HUXP1167A05	SLC2A1	solute carrier family 2 (facilitated glucose transporter), member 1	NM_006516	6513	3	1	0.267104	0.23099	-0.0658993	-0.130308	0.338671	0.426124	0.450184	0.257949	0.220465	-0.00611961	-0.199193	-0.508147	-0.172623	-0.427884	-0.69589	-0.799701	-1.03588	-0.728698	-0.728776	-0.640123	0	-0.125531	-0.706149
HUXP1067B04	SYNJ1	synaptojanin 1	NM_203446	8867	3	1	0.106712	-0.175582	0.0355019	0.0977791	0.090018	-0.0217884	-0.00820357	0.0496147	0.0140237	-0.0922923	-0.216422	-0.369945	-0.264131	-0.534742	-0.6471	-0.924221	-0.986329	-0.844504	-1.04419	-0.716349	-0.398849	-0.194025	-0.0755065
HUXP1026C05	BCL7C	B-cell CLL/lymphoma 7C	NM_004765	9274	3	1	0.112475	-0.16711	0.0449474	-0.007268	0.13616	-0.359081	0.0121406	0.389947	0	-0.0909462	-0.448758	-0.678939	-0.134212	-0.453257	-0.419325	-0.502844	-0.877828	-0.70044	-0.786695	-0.603045	-0.151066	0.0393487	-0.386444
HUXP1121H10	SLC27A5	solute carrier family 27 (fatty acid transporter), member 5	NM_012254	10998	3	1	0.00663309	-0.165338	-0.00685367	0.171903	0.024453	-0.342602	0.0299015	0.0541921	0.0614005	-0.0833284	-0.538669	-0.682971	-0.474486	-0.478047	-0.809003	-0.760459	-1.19377	-1.04836	-1.14218	-0.73434	-0.180572	0.106309	-0.243494
HUXP1067H07	MDN1	MDN1, midasin homolog (yeast)	NM_014611	23195	3	1	0.14055	-0.0262532	-0.101815	-0.00611312	-0.0525681	0.0263754	0.0597421	0.137504	-0.047618	-0.0686166	-0.160992	-0.283172	-0.314179	-0.623355	-0.695419	-0.67319	-0.708769	-0.498663	-0.675378	-0.457946	-0.368899	-0.264107	-0.411314
HUXP1088E05	GPSM1	G-protein signalling modulator 1 (AGS3-like, C. elegans)	Hs.239370	26086	3	1	-0.146589	0.0999258	0.285868	0.00113972	0.158286	0.0353531	-0.0355176	0.170333	0.188037	0.0825481	-0.0648267	-0.330984	-0.256476	-0.374787	-0.625149	-0.715073	-0.463787	-0.461445	-0.667407	-0.507391	-0.454645	-0.379697	-0.142055
HUXP1167E01	C10orf61	chromosome 10 open reading frame 61	NM_015631	26123	3	1	0.0903024	0.106915	0.356953	0.029344	-0.0245223	-0.0182046	-0.0880674	0.0257631	0.0676698	-0.110183	-0.0882137	0.360747	-0.209369	-0.568284	-0.463632	-0.70941	-1	-1.10218	-0.581315	-0.231093	-0.336909	-0.179957	-0.308872
HUXP1087F10	EIF2C2	eukaryotic translation initiation factor 2C, 2	NM_012154	27161	3	1	0.164387	0.297386	0.0733732	0.0641303	0.447459	-0.132755	-0.0671142	0.247218	NaN	-0.0327899	-0.0440552	NaN	-0.208947	0.351472	-0.736966	-0.433573	NaN	NaN	-0.734988	-0.70955	-0.390584	NaN	-0.435585
HUXP1168C12	MIB1	mindbomb homolog 1 (Drosophila)	NM_020774	57534	3	1	-0.148323	-0.299145	-0.219169	-0.254046	-0.180035	-0.230006	-0.128986	-0.29059	0.049753	0.137504	-0.0374747	-0.555215	-0.453626	-0.256565	-0.738225	-0.604591	-0.827819	-0.479168	-0.778336	-0.778368	-0.0675068	-0.0835234	-0.287163
HUXP1198F02	MS4A6A	membrane-spanning 4-domains, subfamily A, member 6A	NM_152851	64231	3	1	-0.102821	0.00742383	0.0349918	-0.101998	-0.0786187	-0.0288207	-0.00239796	0.118496	0.00981262	-0.0219121	-0.0771795	-0.208677	-0.233022	-0.313475	-0.50735	-0.65107	-0.596179	-0.605456	-0.542221	-0.51771	-0.382387	-0.231017	-0.333595
SHR020061027A12	MARCKSL1	MARCKS-like 1	NM_023009	65108	3	1	0.190456	-0.0144226	0.208013	0.0239347	0.130006	0.179719	0.11382	0.211802	0.24522	0.0635142	-0.0812184	-0.468598	-0.59136	-0.861461	-0.771181	-0.910912	-1.02485	-0.830833	-0.811941	-0.755092	-0.644112	-0.589506	-0.620888
HUXP1131E09	POLDIP3	polymerase (DNA-directed), delta interacting protein 3	NM_178136	84271	3	1	-0.0997077	0.160242	-0.00902359	-0.0701634	0.105326	-0.00388809	0.0319031	0.176065	0.196804	0.0372055	-0.082563	-0.321616	-0.114817	-0.391622	-0.726584	-0.764424	-0.438523	-0.763909	-0.50085	-0.631054	-0.27369	-0.170829	-0.168969
SHR020061028C08	FLJ32894	hypothetical protein LOC144360	AC002550	144360	3	1	-0.0774788	-0.311101	-0.0850453	-0.142019	-0.120294	-0.247553	0.0183008	0.0320612	0.132682	-0.0919783	0.129451	-0.494961	-0.460464	-0.432414	-0.521237	-0.566721	-1.00571	-0.742019	-0.543751	-0.454795	-0.322637	-0.16601	-0.327213
HUXP1062C10	PARP1	poly (ADP-ribose) polymerase family, member 1	NM_001618	142	4	1	0.0175228	0.148099	-0.0392817	-0.0207926	0.0439832	-0.00133893	-0.0386858	0.0115957	0.135006	0.118623	0.100778	0.0819076	-0.073086	-0.297862	-0.259279	-0.371393	-0.311374	-0.16665	-0.179532	-0.161875	-0.302029	-0.215432	-0.297843
HUXP1164F10	AUH	AU RNA binding protein/enoyl-Coenzyme A hydratase	NM_001698	549	4	1	0.121015	0.0691244	0.0313642	-0.192645	0.104337	NaN	-0.0322403	-0.062061	0.125531	-0.0565835	0.178597	0.113211	0.0101242	-0.427682	-0.234956	-0.284977	NaN	NaN	-0.33039	-0.191048	-0.247928	-0.233364	-0.267104
SHR020061004C09	CTSH	cathepsin H	NM_148979	1512	4	1	0.185829	0.0732299	0.148971	0.0163811	0.166682	0.131712	0.173167	0.0211177	0.173802	-0.00713954	-0.094374	-0.380249	-0.32022	-0.353337	-0.519001	-0.52066	-0.554589	NaN	-0.509266	-0.308283	-0.146112	-0.130949	-0.298999
HUXP1176D08	CYP19A1	cytochrome P450, family 19, subfamily A, polypeptide 1	NM_031226	1588	4	1	0.115187	0.0605495	0.0312986	0.0182845	0.141297	0.0985987	0.0602662	0.0594022	0.081877	0.0532019	-0.0517366	-0.0614732	-0.0854408	-0.0955235	-0.225924	-0.361194	-0.512881	-0.445018	-0.535501	-0.359209	-0.152764	-0.0606774	-0.0987567
HUXP1127G09	DVL1	dishevelled, dsh homolog 1 (Drosophila)	NM_004421	1855	4	1	0.0676387	0.134271	0.0651527	0.171987	-0.0282495	0.00981429	-0.0347654	-0.0921698	0.194573	0.0276563	0.0088059	-0.103664	-0.0107866	-0.14439	-0.108462	-0.0312187	-0.588144	-0.479526	-0.384918	-0.0343515	-0.249799	-0.281487	-0.321438
HUXP1035B03	EIF4EBP2	eukaryotic translation initiation factor 4E binding protein 2	NM_004096	1979	4	1	0.0689756	-0.00750872	-0.0791232	0.169281	-0.0140447	0.0141303	-0.067866	-0.0843922	0.0644487	-0.0633844	0.0145483	-0.11211	-0.190036	-0.0898255	-0.32546	-0.454162	-0.28661	-0.243557	-0.400962	-0.173638	-0.070804	-0.238741	-0.268875
SHR020061012D10	FUT4	fucosyltransferase 4 (alpha (1,3) fucosyltransferase, myeloid-specific)	NM_002033	2526	4	1	0.239575	0.0327279	0.191555	0	0.280809	0.277534	0.370238	0.00698643	0.132974	-0.112629	0.0461418	0.150492	0.358219	-0.344051	-0.667887	-0.730187	-0.682428	-0.390641	-0.541163	-0.347019	-0.15852	0.227806	-0.327385
HUXP1022B01	GSPT1	G1 to S phase transition 1	NM_002094	2935	4	1	-0.128004	0.0363211	-0.0723115	-0.0729899	-0.0533122	-0.137726	-0.075141	-0.0397286	0.0537607	0.0325905	0.154937	-0.276771	-0.157284	-0.18297	-0.384807	-0.63281	-0.488921	-0.462596	-0.421514	-0.296105	-0.0149754	0.130243	-0.0505213
SHR020060002G12	KPNA3	karyopherin alpha 3 (importin alpha 4)	NM_002267	3839	4	1	-0.0273223	-0.0641016	-0.139713	-0.171995	0.0261365	0.0669372	0.0691836	-0.23502	0.0375968	0.0253389	0.376487	-0.6051	-0.282882	0.180938	-0.386253	-0.578816	-0.555019	-0.836291	-0.62435	-0.6636	-0.218731	-0.283793	0.284077
HUXP1019F05	LDHB	lactate dehydrogenase B	NM_002300	3945	4	1	-0.00911277	0.0617529	0.0579732	0.0359951	-0.0221702	0.0583085	0.0635487	-0.0170885	0.132002	-0.0254387	0.0807384	-0.00915128	-0.155813	-0.214297	-0.277689	-0.436045	-0.614255	-0.360525	-0.392765	-0.202681	-0.527367	-0.155763	-0.108432
HUXP1050D08	MT1G	metallothionein 1G	NM_005950	4495	4	1	-0.0465426	0.455583	0.184106	0.132055	0.260063	0.0888093	0.0266877	0.495769	0.360917	0.198514	-0.00396073	0.227579	0.274268	-0.120016	-0.791814	-0.508945	-0.451211	-0.601228	-0.365805	-0.378751	-0.254678	-0.0916305	0.169925
SHR020061015E01	MT1H	metallothionein 1H	X64834	4496	4	1	0.0623827	0.239049	0.127296	0.0392891	0.137944	0.0867925	0.144007	0.12606	0.357204	0.215419	0.00407623	-0.245971	-0.0323317	-0.167201	-0.393851	-0.70059	-0.147557	-0.440573	-0.325727	-0.411891	-0.0652001	-0.123474	0.0339354
SHR020060005D05	MT1M	metallothionein 1M	NM_005947	4499	4	1	-0.0392352	0.383687	0.0971562	0.085192	0.0882658	0.0824622	0.0385797	0.283513	0.156155	0.251623	-0.020628	-0.311202	0.0811928	-0.0772384	-0.63531	-0.784617	-0.409598	-0.70585	-0.444266	-0.580366	0.0158322	0.112358	-0.0238467
HUXP1001A09	NDUFB10	NADH dehydrogenase (ubiquinone) 1 beta subcomplex, 10, 22kDa	NM_004548	4716	4	1	0.139976	0.211736	0.124451	0.216386	0.183393	0.0693261	0.00367031	0.161447	0.0904672	0.0970508	0.0216951	-0.0654845	-0.0783784	-0.235201	-0.452873	-0.442436	-0.664591	-0.44706	-0.340567	-0.279881	-0.174262	0.142842	-0.0398988
HUXP1126A07	NHP2L1	NHP2 non-histone chromosome protein 2-like 1 (S. cerevisiae)	NM_001003796	4809	4	1	-0.0237529	0.0767118	0.0416929	0.162365	0.062304	0.112827	0.0657335	-0.0871608	-0.0416255	0.134595	-0.0132815	0.0277918	-0.0366607	-0.349801	-0.109756	-0.414459	-0.277221	-0.326841	-0.245201	-0.120553	-0.229125	-0.0422282	-0.0329543
HUXP1004C01	PA2G4	proliferation-associated 2G4, 38kDa	NM_006191	5036	4	1	-0.0467758	0.0553915	0.0405826	0.129283	0.116179	0.130061	0.039856	0.233797	0.0692627	0.0438748	0.0475494	-0.0730706	-0.0592628	-0.259644	-0.419417	-0.510064	-0.496496	-0.489134	-0.433591	-0.193243	-0.137783	-0.0992404	-0.0559254
HUXP1079H09	PIK3R1	phosphoinositide-3-kinase, regulatory subunit 1 (p85 alpha)	NM_181504	5295	4	1	0	-0.00455828	0.0461702	0.111235	0.121991	0.166461	0.22668	0.354573	0.0152668	0.172837	0.0344335	-0.0152668	-0.308825	-0.102224	-0.529437	-0.474404	-0.418658	-0.383647	-0.415037	-0.351927	0.0677446	-0.0110552	-0.167945
HUXP1062B11	QDPR	quinoid dihydropteridine reductase	NM_000320	5860	4	1	-0.0903465	0.413021	0.227968	0.0506261	0.0831412	-0.140863	-0.0317089	0.0849815	0.213815	0.125792	0.111031	0.212281	-0.0554951	-0.343685	-0.451563	-0.50742	-0.561655	-0.545968	-0.328871	-0.243926	-0.553274	-0.257541	-0.312953
HUXP1116D04	SFRS6	splicing factor, arginine/serine-rich 6	NM_006275	6431	4	1	-0.0529489	0.267386	-0.2641	-0.157541	0.155178	0.387993	0.658004	0.866578	0.657425	0.40018	0.166582	-0.117437	-0.273586	-0.259668	-0.25947	-0.375888	-0.459432	-0.281359	-0.0538669	-0.0967407	-0.269637	-0.193363	-0.0678426
HUXP1074F10	SUMO2	SMT3 suppressor of mif two 3 homolog 2 (S. cerevisiae)	NM_006937	6613	4	1	-0.037567	0.140255	0.0734394	0.0861031	0.0434565	-0.00213891	0.0581342	0.125793	0.0671834	0.0710732	0.0606727	-0.10225	-0.126271	-0.198114	-0.169884	-0.303243	-0.304062	-0.393712	-0.292455	-0.242681	-0.131419	-0.0599821	-0.101852
HUXP1203F04	SORD	sorbitol dehydrogenase	NM_003104	6652	4	1	0.0777605	0.0177097	0.061109	0.111632	0.0237388	0.108404	-0.0484404	-0.0452394	0.273059	0.114178	0.187524	0.0249202	0.0395559	-0.228005	-0.295487	-0.469418	-0.486667	-0.55307	-0.462031	-0.396391	-0.342454	-0.419225	-0.426775
HUXP1204G12	TFDP1	transcription factor Dp-1	NM_007111	7027	4	1	-0.0249715	0.0774179	0.166823	0.0727724	0.00157844	0.0574207	0.00779536	-0.0584518	0.0267398	0.0134243	0.167158	0.100755	-0.206372	-0.274647	-0.292551	-0.441488	-0.521116	-0.403918	-0.339606	-0.13086	-0.277727	-0.240475	-0.200509
HUXP1062H12	TTC3	tetratricopeptide repeat domain 3	NM_001001894	7267	4	1	0.0107008	-0.0668092	0.0159142	-0.00986296	-0.0238677	0.00826389	0.0599768	0.167032	0.149832	0.112328	0.344611	-0.253959	-0.211038	-0.279762	-0.514454	-0.742231	-0.618434	-0.568334	-0.489653	-0.349959	-0.226554	-0.255954	-0.0422874
HUXP1082D11	UCP2	uncoupling protein 2 (mitochondrial, proton carrier)	NM_003355	7351	4	1	-0.00812026	0.145734	0.165023	0.240259	0.0915396	0.0740751	0.0756443	0.219861	0.169626	0.103141	-0.0801703	-0.31034	0.000700167	-0.274822	-0.34609	-0.326745	-0.208662	-0.360425	-0.360773	-0.429038	-0.0291011	-0.170189	-0.717145
HUXP1090F04	SLBP	stem-loop (histone) binding protein	NM_006527	7884	4	1	-0.0992579	0.260573	0.154547	0.0780606	0.15868	0.158407	0.252801	0.232334	0.323003	0.100809	0.168146	-0.0251222	-0.0880326	-0.278069	-0.254924	-0.560433	-0.287412	-0.246698	-0.24723	-0.274866	-0.331939	-0.1888	-0.153073
HUXP1213A09	CDC42BPA	CDC42 binding protein kinase alpha (DMPK-like)	NM_003607	8476	4	1	0.0630098	0.0411387	0.0931094	-0.458205	-0.0310269	-0.0493277	0.131245	0.293047	0.0717907	0.068387	0.0232698	0.0480943	0.149895	-0.0107264	-0.450915	-0.430634	-0.333901	-0.217591	-0.399717	-0.369646	-0.289507	-0.183963	-0.254046
SHR020061011G02	EIF1AY	eukaryotic translation initiation factor 1A, Y-linked	NM_004681	9086	4	1	-0.0572857	0.177162	0.0458037	-0.0277154	-0.0444625	-0.00231758	-0.00610616	0.0140226	0.140792	0.217009	0.367237	0.0262315	0.0746787	-0.0369026	-0.201331	-0.444624	-0.334306	-0.445773	-0.359392	-0.287469	-0.487248	-0.437051	-0.142912
HUXP1054G05	INA	internexin neuronal intermediate filament protein, alpha	NM_032727	9118	4	1	-0.060968	0.0192179	0.118855	0.0302939	0.0460964	-0.00575927	-0.0381832	0.0436269	-0.334001	0.0972972	-0.00817393	-0.0490945	-0.256245	-0.321018	-0.323407	-0.500694	-0.521166	-0.628031	-0.177998	-0.333737	-0.169925	-0.0538669	-0.0954803
SHR020061016H07	UBAP2L	ubiquitin associated protein 2-like	NM_014847	9898	4	1	-0.0518389	0.363255	0.150025	-0.171368	0.0266351	-0.182478	0.0821685	NaN	NaN	-0.00753367	0.0976967	-0.216811	-0.193725	-0.216423	-0.368645	-0.341789	-0.498119	NaN	-0.274362	-0.205225	-0.0350469	-0.0473057	-0.381216
SHR020061015B08	CEBPZ	CCAAT/enhancer binding protein zeta	NM_005760	10153	4	1	-0.0645403	-0.123816	-0.280294	-0.285091	-0.0330868	0.00535986	-0.0447665	-0.0225426	0.0160748	0.00225245	0.198968	-0.250137	-0.105825	-0.141946	-0.461711	-0.651817	-0.594631	-0.392785	-0.689031	-0.456638	-0.437991	-0.108361	-0.0224723
HUXP1075C06	OPRS1	opioid receptor, sigma 1	NM_005866	10280	4	1	0.145925	0.0438789	0.122606	0.190616	0.137798	0.0675907	0.0683607	-0.0770453	0.0987522	0.044084	-0.112005	-0.216346	-0.0578675	-0.38476	-0.364462	-0.340451	-0.377202	-0.331774	-0.321928	-0.184335	-0.101152	-0.0208989	-0.10335
HUXP1014A12	MRVI1	murine retrovirus integration site 1 homolog	NM_130385	10335	4	1	-0.0693889	0.066523	-0.00447579	-0.196286	-0.123924	0.134959	0.288964	0.220958	0.340101	0.0529813	0.135984	-0.178829	-0.0579473	-0.0517296	-0.0157482	-0.526069	-0.321137	-0.29956	-0.0805313	-0.222193	-0.409165	-0.251396	-0.140863
HUXP1163G06	PGRMC2	progesterone receptor membrane component 2	NM_006320	10424	4	1	0.0846478	0.189732	0.00664838	0.0786974	0.04791	0.104908	0.192645	0.183307	-0.0557633	0.0210616	0.0458894	-0.108993	-0.235554	-0.441449	-0.550814	-0.431883	-0.43958	-0.472533	-0.458008	-0.237989	-0.430634	-0.278387	-0.262644
HUXP1105E01	ARIH2	ariadne homolog 2 (Drosophila)	NM_199069	10425	4	1	-0.106915	0.1272	0.0304653	0.0817696	0.0850206	-0.0500986	0.0723508	-0.113211	-0.191366	0.0278342	-0.057551	-0.161245	-0.073477	-0.0567071	-0.171368	-0.300395	-0.393821	-0.47468	-0.350211	-0.30849	-0.152003	0.0653262	-0.255537
SHR020061020D10	MYBBP1A	MYB binding protein (P160) 1a	NM_014520	10514	4	1	0.179549	0.0642545	0.164884	0.185379	0.0277985	-0.0709665	0.252731	0.170908	0.0447383	0.0689866	-0.235554	-0.189971	-0.251032	-0.246915	-0.377671	-0.212545	-0.529024	-0.25292	-0.30895	-0.148214	-0.385551	-0.195171	-0.190522
SHR020060011D02	NOL5A	nucleolar protein 5A (56kDa with KKE/D repeat)	NM_006392	10528	4	1	-0.0207287	0.329505	-0.156913	0.180121	-0.101575	0.178825	0.152262	0.138037	0.058064	-0.125258	0.200645	0.155418	-0.0252491	0.0340889	-0.282966	-0.462535	-0.534777	-1.07843	-0.351325	-0.190417	-0.374353	-0.455763	-0.327698
SHR020061001G08	SPHAR	S-phase response (cyclin-related)	NM_006542	10638	4	1	0.0853456	-0.0333061	-0.00184135	0.00882385	0.104517	0.0280923	0.0251906	0.134693	0.158592	0.104725	0.0486348	0.027332	-0.184344	-0.298687	-0.451328	-0.514034	-0.584963	-0.314109	-0.174517	-0.0902667	0.0518389	-0.0978473	-0.0750085
SHR020060011C07	SLC17A3	solute carrier family 17 (sodium phosphate), member 3	NM_006632	10786	4	1	0.0302278	-0.0380598	-0.0380772	0.0275177	0.0944603	0.132962	0.197528	-0.0374895	0.134002	0.0417784	0.0741124	-0.283872	-0.275821	-0.125432	-0.240227	-0.311046	-0.331275	-0.186475	-0.32149	-0.264641	-0.00565887	-0.0211233	-0.102027
HUXP1022A06	RPP40	ribonuclease P 40kDa subunit	Hs.511756	10799	4	1	-0.0632649	0.385383	0.0861566	-0.182079	0.116544	0.21042	0.129385	0.0307435	0.298015	0.244734	0.271194	0.217754	0.00582908	-0.0841403	-0.52045	-0.758155	-0.704544	-0.616671	-0.441204	-0.445105	-0.590042	-0.594123	-0.3403
HUXP1078C10	EBNA1BP2	EBNA1 binding protein 2	NM_006824	10969	4	1	0.0564925	0.256669	0.156638	0.149253	0.140285	0.146925	0.10597	0.0776838	0.225004	0.288775	0.199515	0.270318	0.025125	-0.428313	-0.206484	-0.374598	-0.485427	-0.380497	-0.329982	-0.10981	-0.40821	-0.281952	0.00376753
HUXP1076G10	PDCD11	programmed cell death 11	Hs.239499	22984	4	1	0.152752	-0.0529489	-0.0568745	-0.0202996	0.0298352	-0.0202487	-0.0105886	0.24972	0.0603726	0.178706	-0.0901978	-0.0120392	-0.0709137	-0.303464	-0.523068	-0.382665	-0.521739	-0.600176	-0.54463	-0.425801	-0.482194	-0.149747	-0.199732
HUXP1212B02	AOF2	amine oxidase (flavin containing) domain 2	NM_015013	23028	4	1	0.0763509	0.0970488	0.209133	0.220379	-0.00272464	0.108894	0.103631	-0.0102903	0.10806	-0.0117163	0.00432593	-0.0479168	-0.143141	-0.221509	-0.301725	-0.362881	-0.428913	-0.415037	-0.273994	-0.120582	0.0284564	-0.36257	-0.157541
SHR020060019A05	ETHE1	ethylmalonic encephalopathy 1	NM_014297	23474	4	1	0.204358	0.0141859	0.02301	0.00651331	0.229868	0.238512	0.030192	0.096676	0.0198996	0.0643688	-0.253527	-0.0583642	-0.16549	-0.441838	-0.50943	-0.30372	-0.493989	-0.273761	-0.264323	-0.184122	-0.491853	-0.14439	-0.517706
HUXP1112F08	SEC14L2	SEC14-like 2 (S. cerevisiae)	NM_001003704	23541	4	1	-0.0248034	0.131071	0.098258	0.00489547	0.0371075	-0.0331669	0.0230573	0.129868	0.0476736	0.0063625	-0.1643	-0.196129	-0.0805655	-0.461043	-0.389638	-0.422084	-0.543496	-0.367241	-0.371367	-0.16006	-0.0900102	NaN	-0.18936
HUXP1198C01	AHCTF1	AT hook containing transcription factor 1	NM_015446	25909	4	1	0.0532982	0.188103	-0.132248	-0.18194	-0.477047	0.0692627	0.179768	0.269033	0.456378	0.00861313	0.0114956	-0.10497	-0.275973	-0.147754	-0.279382	-0.417196	-0.29956	-0.364572	-0.152539	-0.284143	-0.508287	-0.153012	-0.253757
HUXP1069F11	VPS41	vacuolar protein sorting 41 (yeast)	NM_080631	27072	4	1	0.101172	0.0884413	0.000862083	0.142387	-0.0502245	0.0814307	-0.0934575	-0.0356402	0.0594958	-0.070623	0.00149735	-0.0750354	-0.281378	-0.340369	-0.522762	-0.60639	-0.719284	-0.517114	-0.482299	-0.246615	-0.400734	-0.233443	-0.252379
HUXP1151A04	TAF5L	TAF5-like RNA polymerase II, p300/CBP-associated factor (PCAF)-associated factor, 65kDa	NM_001025247	27097	4	1	-0.0219148	0.0202724	-0.0253556	0.0524674	0.121186	0.274941	0.225745	0.444641	0.183864	0.227177	0.256148	-0.135463	0.188541	-0.00877021	-0.215168	-0.447799	-0.257601	-0.575685	-0.224345	-0.334919	-0.549773	-0.476965	0.0208787
HUXP1011C12	C12orf24	chromosome 12 open reading frame 24	NM_013300	29902	4	1	-0.106915	0.0211942	-0.0605415	-0.069791	-0.0356239	-0.0111406	0.0135607	-0.11771	-0.0804098	0.0332762	-0.0608608	0.129099	-0.166864	-0.457473	-0.480465	-0.623127	-0.656516	-0.53842	-0.379806	-0.0519586	-0.0751015	-0.121071	0.10252
HUXP1019G06	FTSJ2	FtsJ homolog 2 (E. coli)	NM_013393	29960	4	1	-0.115786	0.203337	0.23725	0.0504784	-0.0539949	0.0345572	0.0189692	0.0635918	0.249251	0.22991	0.0639806	0.118386	-0.241718	-0.324944	-0.283793	-0.306331	-0.444249	-0.415037	-0.199309	-0.22033	-0.4444	-0.315776	-0.139753
HUXP1041F04	EHD4	EH-domain containing 4	NM_139265	30844	4	1	0.0213162	0.0540279	-0.0457311	0.0831253	0.0846016	-0.0379679	0.00561907	0.0287702	-0.0529628	0.0155969	-0.141128	-0.137631	0.0056643	-0.271099	-0.358837	-0.255797	-0.261617	-0.413896	-0.297012	-0.39899	-0.25766	-0.05906	-0.251818
HUXP1189C11	GMNN	geminin, DNA replication inhibitor	NM_015895	51053	4	1	0.0332408	0.246975	0.099723	-0.261212	0.262449	0.204115	0.132953	0.00178662	0.123497	0.0660172	0.197939	-0.111475	-0.162426	-0.158573	-0.309409	-0.56875	-0.230548	-0.380272	-0.365024	-0.146178	-0.237644	-0.160992	0.177281
SHR020061023F11	POLE3	polymerase (DNA directed), epsilon 3 (p17 subunit)	NM_017443	54107	4	1	-0.00728023	0.0743875	0.25363	0.294768	0.148099	0.153268	0.195643	0.205503	0.0949315	0.0394301	-0.0855695	-0.258462	0.304275	-0.399144	-0.546968	-0.509823	-0.358454	-0.662268	-0.399845	-0.361175	-0.359395	-0.217872	-0.518837
HUXP1180B08	FAM35A	family with sequence similarity 35, member A	NM_019054	54537	4	1	-0.0567006	0.131418	0.0341971	-0.112398	-0.00757322	-0.0519634	0.0558439	0.034235	0.147899	0.156504	0.0831042	-0.200853	-0.341352	-0.168666	-0.578879	-0.644305	-0.606593	-0.527819	-0.444739	-0.462126	-0.189478	-0.0619277	-0.281232
HUXP1124C03	C8orf32	chromosome 8 open reading frame 32	NM_018024	55093	4	1	0.140348	0.0874227	0.148973	0.226126	0.243089	0.180014	0.207723	0.213344	0.22257	0.141	-0.0318443	-0.183607	-0.0970896	-0.0603058	-0.296228	-0.378031	-0.378276	-0.455021	-0.513326	-0.33557	-0.117836	-0.160805	0.150679
HUXP1044H03	PNPO	pyridoxamine 5'-phosphate oxidase	NM_018129	55163	4	1	0.00467649	0.188578	0.240833	0.241008	0.170644	0.225767	0.0238467	0.0850976	-0.016841	0.206812	0.0227799	-0.0376377	-0.0045344	-0.315342	-0.576458	-0.555078	-0.575649	-0.505092	-0.301656	-0.357835	-0.179133	-0.328623	0.0529489
HUXP1212D03	RSAD1	radical S-adenosyl methionine domain containing 1	NM_018346	55316	4	1	0.0373864	0.00832727	-0.0631938	-0.00225951	0.166589	0.131245	0.0623561	-0.00348899	0.0794979	-0.0719498	0.0331669	-0.205225	-0.210385	-0.264485	-0.223989	-0.494461	-0.403671	-0.375509	-0.471395	-0.0687734	-0.0881309	0.0606068	-0.225313
HUXP1088F10	H2AFJ	H2A histone family, member J	NM_018267	55766	4	1	-0.00890555	0.0764858	0.0793578	-0.16285	0.156804	0.0464356	-0.0221957	0.0840643	0.126448	0.0422657	-0.156202	-0.0415525	-0.159685	-0.271805	-0.426533	-0.565127	-0.335517	-0.514573	-0.335823	-0.380849	-0.389042	-0.37527	-0.457348
HUXP1197C11	ENY2	enhancer of yellow 2 homolog (Drosophila)	Hs.492555	56943	4	1	0	0.57447	0.0180339	NaN	0.133751	0.0917426	0.25634	0.192645	NaN	0.349449	0.12483	-0.271302	-0.178597	-0.315614	-0.415037	-0.608941	-0.321928	NaN	-0.120294	-0.295045	-0.389212	NaN	-0.141472
HUXP1049G04	CABC1	chaperone, ABC1 activity of bc1 complex homolog (S. pombe)	NM_020247	56997	4	1	-0.0616191	-0.0575281	0.133431	0.0250185	0.0836579	-0.0765338	0.318127	0.410893	0.255135	-0.0633131	-0.111508	0.0977708	-0.0864795	-0.148634	-0.219091	-0.351403	-0.211352	-0.370199	-0.209779	-0.242424	-0.366782	-0.194108	-0.265461
HUXP1060A03	NUFIP2	nuclear fragile X mental retardation protein interacting protein 2	NM_020772	57532	4	1	NaN	-0.251539	-0.151008	-0.203931	0.253757	NaN	0.424753	0.369757	NaN	NaN	-0.0801703	-0.246161	0.0456587	-0.155069	-0.459432	-0.433897	-0.446256	-0.289507	-0.180035	-0.393664	-0.192645	-0.201634	-0.172837
HUXP1031C04	AASDHPPT	aminoadipate-semialdehyde dehydrogenase-phosphopantetheinyl transferase	NM_015423	60496	4	1	-0.149185	0.0471651	0.0217721	-0.163301	-0.0835234	-0.0461175	-0.105549	-0.231998	-0.0928306	0.0793512	0.188735	0.0162406	-0.148726	-0.0899353	-0.362048	-0.581011	-0.415722	-0.473564	-0.324264	-0.263673	-0.0830557	-0.159524	-0.0391613
HUXP1105C12	C20orf67	chromosome 20 open reading frame 67	NM_022104	63935	4	1	0.106915	0.125681	-0.0961237	0.0991081	0.152588	0.0369942	0.0857299	0.19592	0.152003	0.124891	-0.226929	-0.50104	-0.0632424	-0.543705	-0.593617	-0.241008	-0.389628	-0.17568	-0.222042	-0.240314	-0.329501	-0.159576	-0.3109
HUXP1009C08	ZC3H14	zinc finger CCCH-type containing 14	NM_207662	79882	4	1	-0.055648	0.458365	-0.187627	NaN	-0.208366	-0.06286	0.0113153	0.292782	0.169925	0.102811	-0.0610011	0.215268	-0.209453	-0.338671	-0.26096	-0.422501	-0.361188	NaN	-0.367933	-0.404666	-0.228269	-0.264897	-0.540568
HUXP1124G11	SF3B5	splicing factor 3b, subunit 5, 10kDa	NM_031287	83443	4	1	0.0173986	0.106364	-0.0212545	0.17187	0.241182	0.139773	0.102423	0.163946	0.135588	0.0411859	-0.0888757	-0.279249	-0.222699	-0.142896	-0.38144	-0.423116	-0.482184	-0.59561	-0.486469	-0.443983	-0.175303	-0.138016	0.10927
HUXP1031C06	C12orf52	chromosome 12 open reading frame 52	NM_032848	84934	4	1	-0.10953	0.207405	0.246456	0.307182	0.207461	0.145155	0.219766	0.349383	0.0984037	0.196629	-0.136448	-0.251962	-0.224773	-0.554266	-0.563705	-0.415037	-0.521116	-0.357032	-0.257217	-0.0766928	0.0748148	-0.209362	-0.201798
SHR020060007C04	IFT20	intraflagellar transport 20 homolog (Chlamydomonas)	NM_174887	90410	4	1	-0.101991	0.325198	-0.102674	-0.307429	0.162999	0.14836	0.119326	0.130829	0.0303098	0.087556	0.116971	0.0366898	-0.0411774	-0.148596	-0.277323	-0.517399	-0.442642	-0.726182	-0.498781	-0.370233	-0.571206	-0.319326	-0.345955
SHR020061008B12	HARS2	histidyl-tRNA synthetase 2	NM_080820	92675	4	1	0.158484	0.137504	0.117133	0.12753	0.183496	0.10802	0.0714505	0.00913101	0.183222	0.141428	0.198373	0	0.17423	0.0361069	-0.287674	-0.267518	-0.498375	-0.79573	-0.321591	-0.466126	-0.561533	-0.432405	-0.22741
HUXP1167G05	H2AFV	H2A histone family, member V	Hs.488189	94239	4	1	-0.115601	0.121844	-0.223191	-0.114316	-0.000934086	0.135041	0.118329	0.0507308	0.205922	0.167511	0.164607	-0.144778	-0.206914	-0.20148	-0.377888	-0.442929	-0.53003	-0.364327	-0.308248	-0.371969	-0.176047	-0.416491	-0.285361
HUXP1058H04	GPRASP2	G protein-coupled receptor associated sorting protein 2	NM_014710	114928	4	1	0.133267	0.0282402	-0.197708	-0.0126368	0.084146	0.0997731	0.150243	0.325443	0.369357	-0.0669584	0.060121	0.0118741	-0.331118	-0.425433	-0.647698	-0.513409	-0.668324	-0.364997	-0.209196	0.109373	-0.318419	-0.337538	-0.236067
HUXP1175F10	TUBB	tubulin, beta	NM_178014	203068	4	1	0.10985	0.0034649	-0.0989109	0.0986861	-0.0445209	0.0186407	-0.0482294	-0.0331407	0.260468	0.0619983	0.0413473	0.0165968	-0.401416	-0.114275	-0.331317	-0.471316	-0.439652	-0.0762517	-0.316258	-0.109413	-0.00798904	-0.0205234	0.203181
SHR020061002A01	AK2	adenylate kinase 2	NM_013411	204	5	1	-0.00357989	0.131111	0.0703587	0.0217387	0.164288	0.0340542	0.155544	0.011516	0.117245	0.0495631	0.0784102	-0.247392	0.0340264	-0.279556	-0.48693	-0.609097	-0.627683	NaN	-0.305205	-0.184226	0.386444	0.586389	0.190346
HUXP1016E05	ARHGDIA	Rho GDP dissociation inhibitor (GDI) alpha	NM_004309	396	5	1	0.0474667	-0.226763	-0.0617197	-0.111421	-0.049753	-0.0673886	-0.028248	0.197101	-0.151294	-0.200502	-0.531868	-0.798882	-0.519756	-0.661207	-0.650465	-0.599272	-0.619939	-0.25749	-0.171583	-0.0407717	0.473762	0.562637	-0.137475
SHR020060009E04	BCAT2	branched chain aminotransferase 2, mitochondrial	NM_001190	587	5	1	0.0884688	-0.256401	-0.0290485	-0.0594718	0.178903	-0.147226	-0.203414	-0.0500986	-0.0901978	-0.27208	-0.701194	-0.698077	-0.508034	-0.689151	-0.687324	-0.464075	-0.775294	-0.383975	-0.498027	-0.312437	0.296617	0.531782	-0.216423
SHR020061006D08	BMP2	bone morphogenetic protein 2	AF040249	650	5	1	0.102098	0.280108	0.125531	NaN	0.284729	0.277781	0.263034	NaN	0.239951	0.00952277	0.0386213	0.236067	-0.330645	-0.412902	-0.55613	-0.498806	NaN	NaN	-0.249978	-0.10343	0.065095	0.397335	0.229482
HUXP1213B07	TSPO	translocator protein (18kDa)	NM_000714	706	5	1	0.176779	-0.0215122	-0.0254226	-0.10006	0.12731	0.0101958	0.0631938	0.0502032	0.0787541	-0.0343337	-0.151077	-0.316091	-0.193496	-0.309002	-0.316214	-0.206132	-0.776247	-0.216088	-0.41366	-0.0890456	0.0784162	0.187694	0.113709
HUXP1006A02	CCND2	cyclin D2	NM_001759	894	5	1	-0.0391116	0.146813	0.0284966	0.0538646	0.118505	0.058043	0.105324	0.0134644	0.0119232	-0.0400179	-0.180389	-0.566633	-0.617228	-0.839512	-0.968234	-0.949356	-1.11816	-0.523617	-0.426939	-0.154244	0.281094	-0.0636977	0.0137559
SHR020060015G08	DDX6	DEAD (Asp-Glu-Ala-Asp) box polypeptide 6	NM_004397	1656	5	1	0.0921182	-0.0567319	-0.423425	0.0455626	0.0346461	0.174498	0.0402639	0.506279	0.210218	0.0447879	0.133088	-0.435386	-0.50916	0.142835	-0.473214	-0.0796594	-0.484459	-0.676651	-0.388432	-0.34505	0.499102	0.782409	0.492114
HUXP1001H04	DHCR7	7-dehydrocholesterol reductase	NM_001360	1717	5	1	0.116179	0.0931875	-0.278251	-0.0414504	0.286357	0.20852	0.183164	0.0622843	-0.0638263	-0.174978	-0.247093	-0.291806	0.070749	-0.114672	-0.347923	-0.320272	-0.321928	-0.577357	-0.589439	-0.439635	0.10212	0.4193	-0.16673
HUXP1090E12	EIF5A	eukaryotic translation initiation factor 5A	NM_001970	1984	5	1	0.260045	0.128705	0.254101	0.220207	0.410829	0.265477	0.341736	0.573823	0.348078	0.203023	-0.262945	-0.698089	0.220393	-0.00214177	-0.604303	-0.42984	-0.750401	-0.643426	-0.706237	-0.634035	0.702506	0.813632	-0.0574503
HUXP1109E09	FKBP5	FK506 binding protein 5	NM_004117	2289	5	1	-0.0266351	-0.0130917	0.098213	-0.0138889	0.113512	-0.0618884	0.124104	0.202652	-0.0215332	0.0228585	-0.272744	-0.163499	-0.349082	-0.394315	-0.729853	-0.271341	-0.584963	-0.102646	0.135324	0.0895613	0.00878356	0.228596	-0.0420816
HUXP1075B01	FLOT2	flotillin 2	NM_004475	2319	5	1	-0.0300126	-0.107057	0.017702	0.109163	0.0722449	-0.0261128	0.0471952	0.382654	0.163591	-0.121231	-0.370491	-0.846417	-0.163108	-0.381274	-0.525283	-0.289507	-0.495957	-0.162173	-0.285833	-0.215168	0.544805	0.485427	-0.0405152
HUXP1118B02	ITGA6	integrin, alpha 6	NM_000210	3655	5	1	0.22542	-0.0276563	0.0731664	-0.0549665	0.171368	0.0995357	0.234465	0.244622	NaN	0.244622	0.143735	0.0331669	-0.205399	-0.297201	-0.666757	-0.582332	NaN	NaN	-0.36257	-0.391687	0.466176	0.0931094	0.288676
SHR020060007G11	JARID2	jumonji, AT rich interactive domain 2	NM_004973	3720	5	1	0.116324	0.0164881	-0.170239	-0.136502	0.0717358	0.198479	0.282218	0.311686	0.0291463	-0.333243	-0.372848	-0.229648	-0.453086	-0.290947	-0.386355	-0.106551	-0.409324	-0.10652	-0.0616465	0.0613002	0.104469	0.296132	0.363628
HUXP1165B10	LDHA	lactate dehydrogenase A	NM_005566	3939	5	1	0.270109	0.255498	0.237946	0.396361	0.602938	0.47258	0.324624	-0.0188677	0.294724	0.362718	0.0788312	-0.293979	-0.0199436	-0.238098	-0.536365	-0.49924	-0.750368	-0.266028	-0.546185	-0.327468	0.646141	0.466685	0.266763
HUXP1199G07	NP	nucleoside phosphorylase	NM_000270	4860	5	1	0.148378	0.225635	-0.229012	-0.0317758	0.27844	0.327059	0.20745	-0.250008	0.121208	0.0384405	-0.0243423	-0.0969358	-0.120604	-0.638964	-0.917251	-0.948555	-1.04822	-0.387132	-0.398752	0.110298	0.34256	0.199105	0.123224
SHR020060009H02	PPP1R10	protein phosphatase 1, regulatory subunit 10	NM_002714	5514	5	1	0.117133	-0.0697703	0.0482552	0.217307	-0.00946033	-0.025091	0.0521227	0.173149	0.0149503	-0.225713	0.0852473	-0.431951	-0.157386	0.105493	-0.534947	-0.0530184	-0.552541	-0.604699	-0.373654	-0.454566	0.631133	NaN	-0.0534393
SHR020061009B12	PRKCA	protein kinase C, alpha	NM_002737	5578	5	1	0.0365259	0.0415193	-0.106915	-0.162057	0.0333586	-0.227069	-0.0511153	0.106915	0	-0.169925	-0.300174	-0.430144	-0.421464	-0.0773057	-0.454176	-0.382146	-0.432959	NaN	-0.273761	-0.535037	0.0524674	0.198904	0.315862
HUXP1005F02	HLTF	helicase-like transcription factor	NM_139048	6596	5	1	-0.0191596	-0.302563	-0.239188	-0.19762	-0.0729315	0.03012	-0.0828411	-0.3504	0.0927941	-0.0689474	-0.189572	-0.401688	-0.236332	-0.00547513	-0.608276	-0.484049	-0.539996	-0.497711	-0.653332	-0.423952	0.187892	0.211319	0.229721
HUXP1002F12	SRM	spermidine synthase	NM_003132	6723	5	1	0.194593	0.357829	0.205906	0.42929	0.339393	0.277445	0.227454	0.266555	0.24267	0.175169	-0.0893396	-0.386188	0.0292362	-0.250365	-0.630902	-0.523485	-0.754972	-0.613327	-0.608534	-0.498777	0.114362	0.328006	-0.0897967
SHR020060011G02	VPS72	vacuolar protein sorting 72 (S. cerevisiae)	NM_005997	6944	5	1	-0.0816838	0.0281236	0.270221	-0.1127	0.108934	NaN	0.206451	-0.38109	NaN	-0.0703893	-0.316672	-0.644905	-0.104531	-0.244734	-0.285402	-0.177918	-0.647328	-0.244237	-0.424071	-0.699246	0.307429	0.690316	-0.373217
SHR020061014D03	TSTA3	tissue specific transplantation antigen P35B	NM_003313	7264	5	1	0.155593	-0.124179	0.092837	-0.17568	0.0119396	-0.00765357	0.0118254	-0.113009	0.12519	-0.0960467	-0.436387	-0.807355	-0.385378	-0.2824	-0.486038	-0.367975	-0.717761	NaN	-0.721167	-0.576272	0.201634	0.547932	-0.31824
SHR020061035F11	HIRA	HIR histone cell cycle regulation defective homolog A (S. cerevisiae)	NM_003325	7290	5	1	-0.199938	-0.0603005	-0.372766	-0.143453	0.311586	0.0339473	0.382066	0.372302	0.0995357	0.203931	0	-0.407769	0.108736	-0.251918	-0.652077	-0.24664	-0.791758	-0.432227	-0.275634	-0.302388	-0.0333586	0.32073	-0.173628
HUXP1017D08	VIL2	villin 2 (ezrin)	NM_003379	7430	5	1	-0.0707545	-0.112449	0.129283	-0.0374747	0.122716	-0.0835837	0.164926	0.421325	-0.100747	-0.028191	-0.534995	-0.418421	-0.436099	-0.0967248	-0.524905	-0.21974	-0.629654	-0.28807	-0.230381	-0.386936	0.467737	0.550181	-0.0134132
SHR020060008E06	WT1	Wilms tumor 1	NM_024426	7490	5	1	-0.128986	-0.202105	-0.0285692	NaN	0.0959691	0	0.1899	-0.247928	NaN	-0.278102	-0.149378	NaN	-0.625152	-0.417051	-0.792195	-0.793828	NaN	NaN	-0.687061	-0.215729	0.97283	NaN	0.11211
SHR020061035H06	ZP3	zona pellucida glycoprotein 3 (sperm receptor)	NM_012230	7784	5	1	0.0579473	-0.115175	-0.0388192	0.0256106	-0.0424353	-0.0878433	-0.112953	0.321928	0.0232698	0.0572069	0.0232074	-0.298738	-0.318915	-0.0851674	-0.571396	-0.18089	-0.675778	-0.554075	-0.301575	-0.467294	0.419539	0.369	0.226509
HUXP1021F07	LST1	leukocyte specific transcript 1	NM_205838	7940	5	1	-0.0468666	-0.0443384	-0.108655	-0.112217	0.08092	0.04313	-0.040443	0.0913827	0.191768	-0.0302599	-0.169925	-0.23453	-0.300579	-0.516591	-0.671177	-0.467849	-0.622668	-0.264748	0.110804	0.115993	0.264517	0.129567	0.289997
HUXP1089A12	DPM2	dolichyl-phosphate mannosyltransferase polypeptide 2, regulatory subunit	NM_003863	8818	5	1	0.0835647	0.104143	0.0820482	-0.319177	0.00866486	-0.108688	0.100067	-0.0425395	-0.195256	-0.27946	-0.478442	-1.21501	-0.143166	-0.102362	-0.452792	-0.417804	-0.584963	-0.565904	-0.617811	-0.681687	1.05344	0.474442	-0.0421966
SHR020061017H02	RIN1	Ras and Rab interactor 1	NM_004292	9610	5	1	0.166157	0.0781388	-0.074547	0.0120225	-0.0327899	-0.0986843	0.0230836	0.229734	0	-0.0690416	-0.264546	-0.807355	-0.582443	-0.75336	-0.655352	-0.524915	NaN	NaN	-0.0529489	-0.114171	0.335603	NaN	-0.162553
HUXP1033H06	TRIM14	tripartite motif-containing 14	NM_014788	9830	5	1	0.354431	0.0190248	0.23349	0.0671142	0.296982	0.111508	0.148523	0.0101242	0.281771	-0.0335526	0.0510742	-0.161155	-0.361429	-0.355095	-0.620586	-0.624491	-1.09592	-0.358687	-0.417727	-0.100527	0.218424	0.231326	0.170933
SHR020061015C08	TROAP	trophinin associated protein (tastin)	NM_005480	10024	5	1	0.18206	0.101283	-0.119582	NaN	0.0531113	0.0812238	0.335935	-0.218001	NaN	-0.129283	-0.283072	-0.817623	-0.3614	-0.0775829	-0.165424	-0.148863	-0.733354	NaN	-0.463567	-0.666263	0.244622	NaN	0.0176299
HUXP1198E03	PPIF	peptidylprolyl isomerase F (cyclophilin F)	NM_005729	10105	5	1	0.0417271	0.305758	0.0284564	-0.0830476	0.348689	0.296049	0.405523	0.426644	0.496938	0.463383	0.0584956	-0.257601	-0.179415	-0.412456	-0.388545	-0.31034	-0.800859	-0.360645	-0.197383	-0.17287	0.215492	0.191555	-0.128475
SHR020061016D10	TMEM147	transmembrane protein 147	NM_032635	10430	5	1	-0.0146965	0.00724974	0.0574381	-0.0158714	-0.0374	0.0310269	-0.0302463	-0.0644887	0	-0.0965944	-0.193702	-0.28523	-0.160936	-0.072064	-0.3076	-0.270398	-0.549442	-0.521698	-0.407406	-0.265112	0.0693933	0.409113	0.048363
SHR020060019D11	RGS14	regulator of G-protein signalling 14	NM_006480	10636	5	1	0.274622	-0.00450139	-0.0828003	0.089005	0.275634	0.331206	0.324247	-0.0485802	-0.0636586	-0.0220263	-0.529549	-0.93546	-0.716207	-0.552541	-0.880701	-0.409014	-0.954196	-0.0321804	0.120468	0.235103	0.800469	0.525091	0.176251
HUXP1106E02	CAMKK2	calcium/calmodulin-dependent protein kinase kinase 2, beta	NM_006549	10645	5	1	0.131398	0.0963761	0.0729794	0.0479168	0.0353743	-0.0775829	0.095759	0.303247	0.150363	0.0356239	-0.152506	-0.569366	-0.318788	-0.30603	-0.449307	-0.44586	-0.515357	-0.379772	-0.292921	0.0776028	0.347061	0.571906	0.0320612
SHR020061008E08	39334	septin 9	NM_006640	10801	5	1	0.264675	-0.0816288	0.388162	0.341307	0.172295	0.00712443	0.462486	0.342966	0.565063	0.141797	-0.0713498	-0.589492	-0.120294	-0.586258	-0.486903	-0.273123	-0.64784	0.237822	-0.576441	-0.241818	0.196397	0.442444	0.116645
SHR020060016A03	CD3EAP	CD3e molecule, epsilon associated protein	NM_012099	10849	5	1	0.400045	0.291153	0.401232	0.465974	0.482601	0.5025	0.320199	0.268935	0.0962153	0.0655883	0.329659	-0.601738	-0.21456	-0.00435202	-0.284729	-0.459856	-0.773115	-0.725825	-0.378988	-0.219198	0.286563	0.222392	0.150104
HUXP1023G04	C22orf9	chromosome 22 open reading frame 9	NM_015264	23313	5	1	0.0541074	0.171865	0.267613	0.117304	0.277475	0.225972	0.213404	0.48375	0.522983	0.163847	0.00242266	-0.383329	-0.202987	-0.45924	-0.536753	-0.539989	-0.577487	-0.222392	-0.0229424	0.0225426	0.312555	0.0688494	0.0350292
SHR020061025B10	CABIN1	calcineurin binding protein 1	NM_012295	23523	5	1	-0.00628626	0.14953	0.0167757	-0.0436269	0.0558109	0.0811961	0.190841	0.543705	0.286972	-0.0860578	-0.181447	-0.532433	-0.366272	-0.344595	-0.579856	-0.596644	-0.77259	-0.50696	-0.152622	0.0354987	0.445411	0.721844	0.155795
HUXP1072H05	DECR2	2,4-dienoyl CoA reductase 2, peroxisomal	NM_005009	26063	5	1	0.0214531	0.0439855	0.0750507	0.22167	0.0197482	0.183246	0.0531872	0.0344145	0.0773198	0.0581476	-0.213769	-0.266473	-0.305755	-0.503612	-0.437649	-0.491131	-0.978716	-0.379045	-0.294399	0.0251639	0.464142	0.704082	0.413351
SHR020061027C12	MCAT	malonyl CoA:ACP acyltransferase (mitochondrial)	NM_014507	27349	5	1	-0.025091	0.251323	0.0715533	0.224919	0.219169	0.0435893	0.0287973	0.114993	-0.0530184	0.109229	-0.37151	-0.777608	-0.105467	-0.457473	-0.714843	-0.582045	-1.00705	-0.48433	-0.532111	-0.501011	0.347019	0.521809	-0.112894
HUXP1020A05	GEMIN4	gem (nuclear organelle) associated protein 4	NM_015721	50628	5	1	0.0422798	0.0900272	0.113849	0.125687	0.155795	-0.01385	0.132104	0.142883	0.10914	0.0161197	-0.282143	-0.321928	-0.210447	-0.367581	-0.464321	-0.408679	-0.551539	-0.306807	-0.34245	-0.203012	0.095262	0.0385885	-0.111347
SHR020060013D04	DDX56	DEAD (Asp-Glu-Ala-Asp) box polypeptide 56	NM_182547	54606	5	1	0.0753653	-0.192645	0.00737011	NaN	-0.0219843	-0.106451	-0.0554951	-0.186413	-0.0152668	-0.102362	-0.0531839	-0.726036	-0.19827	-0.0642446	-0.455817	-0.121587	-0.582402	-0.636188	-0.546542	-0.365668	0.14439	0.588275	-0.295985
SHR020061033C05	CSRP2BP	CSRP2 binding protein	NM_020536	57325	5	1	0.145082	-0.127005	-0.0119925	-0.216064	0.149984	0.0766213	0.182653	0.0957985	0.244153	-0.0808678	-0.108641	-0.221127	-0.366782	-0.0988918	-0.281632	-0.569021	-0.607158	-0.332017	-0.478573	-0.111269	-0.0323609	0.0741818	0.194459
HUXP1195F12	CHID1	chitinase domain containing 1	NM_023947	66005	5	1	0.1805	-0.226891	0.104019	0.119424	0.172293	-0.0764031	0.261633	0.18896	-0.0182582	0.0228732	-0.409612	-0.514573	-0.0953114	-0.382533	-0.610137	0.0361996	-0.501002	-0.343713	-0.378635	-0.393698	0.559178	0.629572	-0.0600122
HUXP1047F06	GLT25D1	glycosyltransferase 25 domain containing 1	NM_024656	79709	5	1	-0.0135784	0.14165	0.166224	0.241579	0.257798	0.114502	0.203323	0.296211	0.248015	0.161481	0.00295938	-0.512586	-0.204156	-0.413196	-0.586982	-0.495325	-0.777886	-0.39183	-0.13515	0.0353446	0.551516	0.457473	0.198727
HUXP1140H09	C19orf12	chromosome 19 open reading frame 12	NM_031448	83636	5	1	-0.0777645	-0.191641	-0.0587106	-0.215998	0.36347	-0.0524674	0.208161	0.238849	-0.221924	-0.0735651	-0.544028	-0.518959	-0.902212	-0.22294	-1.13947	-0.85579	-0.762527	-0.397989	-0.780939	-0.674751	0.468748	0.313426	-0.373361
HUXP1108C02	PDCD2L	programmed cell death 2-like	NM_032346	84306	5	1	0.244021	-0.332773	0.218188	-0.403999	0.0452907	-0.0364758	0.329951	0.247612	-0.271899	-0.141303	-0.531623	-0.660476	-0.756119	-0.200178	-0.832333	-0.84531	-0.709662	-0.466161	-0.750711	-0.881388	0.28165	0.288014	-0.0998392
HUXP1188G03	LZIC	leucine zipper and CTNNBIP1 domain containing	NM_032368	84328	5	1	-0.0902215	-0.2734	-0.0521017	-0.31967	0.0441446	-0.0484017	0.0753028	0.592536	-0.15001	-0.076962	-0.174137	-0.536609	-0.809123	-0.0953185	-0.435757	-0.491248	-0.466516	-0.300838	0.0261994	-0.0119366	0.138874	0.716639	-0.0734298
HUXP1170F03	ABHD14B	abhydrolase domain containing 14B	NM_032750	84836	5	1	0.0804899	-0.0274807	-0.0175726	0.18852	0.396581	0.101086	0.0542771	0.323245	0.0114956	-0.14468	-0.401276	-0.809435	-0.369677	-0.482601	-0.682104	-0.371734	-0.562242	-0.501546	-0.59732	-0.361944	0.555963	0.36257	0.210086
HUXP1194C07	TMEM141	transmembrane protein 141	NM_032928	85014	5	1	0.249359	-0.277985	0.267322	NaN	0.182094	0.0956522	0.0803734	NaN	0.0832555	0.0984037	-0.0901978	NaN	-0.136321	-0.0770762	-0.173767	-0.217805	-0.713287	NaN	-0.57299	-0.216079	0.442222	0.594008	0.0588937
HUXP1197G07	TOP1MT	topoisomerase (DNA) I, mitochondrial	NM_052963	116447	5	1	0.194235	-0.111522	-0.0962153	0.0759933	0.134176	0.128898	0.108758	0.103968	0.175333	0.0115416	-0.175639	-0.173648	-0.280736	-0.336455	-0.454474	-0.565763	-0.787815	-0.35182	-0.401617	0.0942876	0.301081	0.523448	0.274336
SHR020060002B03	COMTD1	catechol-O-methyltransferase domain containing 1	NM_144589	118881	5	1	0.109347	0.0621724	0.0509839	0.174424	-0.0868048	-0.0584167	0.146112	0.125531	0.276445	-0.105678	-0.0592972	-0.294061	-0.066671	-0.103476	-0.426442	-0.246747	-0.908078	-0.632791	-0.617667	0.36257	-0.0664954	0.0832555	0.333341
SHR020061012G07	HIGD2A	HIG1 domain family, member 2A	NM_138820	192286	5	1	0.0688768	-0.0387696	0.0508664	0.0663536	0.155634	0.0652915	0.150431	0.00532033	0.110889	0.0165765	-0.357552	-0.571121	-0.307615	-0.243609	-0.465539	-0.172309	-0.458699	-0.316628	-0.401406	-0.262453	0.447054	0.486921	0.0628877
HUXP1044A07	AMBP	alpha-1-microglobulin/bikunin precursor	NM_001633	259	11	1	-0.216938	-0.313098	-0.309799	-0.309006	-0.240235	-0.388196	-0.209453	0.133798	-0.409627	-0.472488	-0.587137	-0.523562	-0.32845	-0.233059	-0.409876	-0.289507	-0.726435	-0.134824	-0.296691	-0.244734	-0.198904	0.0888813	-0.304855
HUXP1109E11	APOC2	apolipoprotein C-II	NM_000483	344	11	1	-0.0896266	-0.392016	-0.102589	-0.229459	-0.0403253	-0.215064	-0.112513	0.247109	-0.265088	-0.171408	-0.70428	-0.507152	-0.56618	-0.400969	-0.895984	-0.514179	-0.69083	-0.416381	-0.509882	-0.591526	0.0829486	0.310749	-0.25103
HUXP1065A04	ATP1B1	ATPase, Na+/K+ transporting, beta 1 polypeptide	NM_001677	481	11	1	-0.214069	-0.459061	-0.167123	-0.302892	-0.25644	-0.202504	-0.267058	-0.0364663	-0.394797	-0.334995	-0.540231	-0.473528	-0.373511	-0.525024	-0.520549	-0.229351	-0.408154	-0.370875	-0.343325	-0.477878	-0.540996	0.0881679	-0.599141
HUXP1044D08	ALDH7A1	aldehyde dehydrogenase 7 family, member A1	NM_001182	501	11	1	-0.200122	-0.334154	-0.210067	-0.235792	-0.234347	-0.249778	-0.282517	0.0132896	-0.526734	-0.355066	-0.557522	-0.478004	-0.21836	-0.338776	-0.449355	-0.19878	-0.389546	-0.354146	-0.3778	-0.38072	-0.188702	0.0103941	-0.272587
HUXP1005G04	ATP5E	ATP synthase, H+ transporting, mitochondrial F1 complex, epsilon subunit	NM_016045	514	11	1	-0.0777192	-0.330663	-0.0999076	-0.365062	-0.170981	-0.165586	-0.146066	0.0576661	-0.394099	-0.262877	-0.491303	-0.471677	-0.24843	-0.395406	-0.392691	-0.351692	-0.39234	-0.360497	-0.39255	-0.389554	-0.0440552	-0.0604692	-0.387968
HUXP1124C07	BAI2	brain-specific angiogenesis inhibitor 2	NM_001703	576	11	1	-0.265418	-0.381659	-0.254328	-0.350139	-0.300045	-0.302443	-0.435493	-0.00625356	-0.344071	-0.529921	-0.542668	-0.653648	-0.396824	-0.276154	-0.607085	-0.47271	-0.496767	-0.357941	-0.428605	-0.607253	0.0208185	0.0669101	-0.408896
HUXP1167B03	BBS2	Bardet-Biedl syndrome 2	NM_031885	583	11	1	-0.0555923	-0.408492	-0.120798	-0.416334	-0.227536	-0.247276	-0.151032	0.0303311	-0.148564	-0.315776	-0.469485	-0.416068	-0.431951	-0.310574	-0.480805	-0.418849	-0.5025	-0.346481	-0.397311	-0.157447	-0.0578809	0.234706	-0.538488
HUXP1009F03	BCL9	B-cell CLL/lymphoma 9	NM_004326	607	11	1	-0.230351	-0.258762	-0.132028	-0.220622	-0.0981315	-0.297887	-0.172514	0.165398	-0.202493	-0.333856	-0.475939	-0.482209	-0.206686	-0.224966	-0.49529	-0.27017	-0.414248	-0.309142	-0.315144	-0.342846	-0.341281	0.0484404	-0.267387
HUXP1038B02	BPHL	biphenyl hydrolase-like (serine hydrolase; breast epithelial mucin-associated antigen)	NM_004332	670	11	1	-0.280984	-0.334466	-0.144195	-0.269449	-0.226325	-0.24645	-0.222823	0.0811571	-0.571542	-0.404823	-0.521819	-0.48096	-0.306978	-0.450973	-0.471032	-0.381591	-0.376881	-0.487957	-0.314355	-0.495647	-0.346651	-0.245957	-0.531613
HUXP1041A04	SERPING1	serpin peptidase inhibitor, clade G (C1 inhibitor), member 1, (angioedema, hereditary)	NM_000062	710	11	1	-0.410632	-0.373908	-0.398084	-0.10561	-0.287098	-0.28102	-0.506353	NaN	-0.292782	-0.274439	-0.381563	NaN	-0.423499	-0.405819	-0.405992	-0.395409	-0.415037	-0.177538	-0.324129	-0.446256	-0.103623	-0.130061	-0.495695
HUXP1015E08	CA2	carbonic anhydrase II	NM_000067	760	11	1	-0.287882	-0.280247	-0.235088	-0.359982	-0.232234	-0.315936	-0.229765	-0.291029	-0.188723	-0.213999	-0.311345	-0.796069	-0.352302	-0.24716	-0.535494	-0.609152	-0.526189	-0.271488	-0.392989	-0.711655	-0.0884849	-0.246499	-0.461213
HUXP1126B04	CSH1	chorionic somatomammotropin hormone 1 (placental lactogen)	NM_000515	1442	11	1	-0.206548	-0.581174	-0.180223	-0.266109	-0.281056	-0.332907	-0.432396	0.129964	-0.302596	-0.31969	-0.538583	-0.590807	-0.427207	-0.506862	-0.473429	-0.136513	-0.351508	-0.321928	-0.452985	-0.488481	-0.0329983	0.344695	-0.61323
HUXP1003D12	CYP11A1	cytochrome P450, family 11, subfamily A, polypeptide 1	NM_000781	1583	11	1	-0.174769	-0.29311	-0.216594	-0.221683	-0.215013	-0.206794	-0.273226	0.0387845	-0.385266	-0.334359	-0.429669	-0.399069	-0.281265	-0.368986	-0.472171	-0.250267	-0.317885	-0.397467	-0.418835	-0.455383	-0.135529	0.0780465	-0.469041
HUXP1044F04	CYP27A1	cytochrome P450, family 27, subfamily A, polypeptide 1	NM_000784	1593	11	1	-0.23644	-0.349008	-0.317246	-0.223194	-0.13852	-0.141586	-0.308122	0.0518389	-0.475768	-0.373845	-0.472171	-0.614864	-0.365794	-0.449624	-0.437267	-0.378225	-0.320901	-0.306906	-0.268489	-0.308587	-0.0921182	-0.127192	-0.391191
HUXP1017G03	DAB2	disabled homolog 2, mitogen-responsive phosphoprotein (Drosophila)	NM_001343	1601	11	1	-0.200656	-0.343312	-0.110597	-0.37403	-0.162271	-0.28963	-0.118196	0.187295	-0.367313	-0.334619	-0.643501	-0.58287	-0.613374	-0.404791	-0.938452	-0.555867	-0.638145	-0.408956	-0.518362	-0.657967	0.370034	0.316006	-0.338256
HUXP1072A02	EGR3	early growth response 3	NM_004430	1960	11	1	-0.0826707	-0.46062	0.0462084	-0.498748	0.0719498	-0.178193	0.195891	0.528566	-0.234391	-0.146592	-0.729352	-0.555414	-0.785366	-0.487895	-1.29778	-0.856182	-1.01417	-0.669217	-1.05422	-1.19265	0.342687	0.528282	-0.307647
HUXP1018C12	FYB	FYN binding protein (FYB-120/130)	NM_001465	2533	11	1	-0.0487208	-0.390128	-0.0216753	-0.31758	0.0123572	-0.153798	0.041255	0.248503	-0.294497	-0.153817	-0.488916	-0.483375	-0.671014	-0.328623	-0.891425	-0.557436	-0.824244	-0.604148	-0.573561	-0.723829	0.268996	0.263643	-0.259337
HUXP1042H01	SLC37A4	solute carrier family 37 (glycerol-6-phosphate transporter), member 4	NM_001467	2542	11	1	-0.202022	-0.366943	-0.0250329	-0.225648	-0.182958	-0.128048	-0.113305	0.0758314	-0.42107	-0.28916	-0.500813	-0.472435	-0.367967	-0.508147	-0.52951	-0.412239	-0.499233	-0.477457	-0.507016	-0.428954	-0.322525	-0.0241029	-0.531381
HUXP1056C11	GABBR1	gamma-aminobutyric acid (GABA) B receptor, 1	NM_021904	2550	11	1	-0.12988	-0.482099	-0.253605	-0.322779	-0.280416	-0.29125	-0.389461	-0.0663874	-0.423737	-0.436986	-0.47201	-0.541373	-0.384891	-0.412206	-0.438884	-0.0998639	-0.424189	-0.289956	-0.208672	-0.205924	-0.203968	0.146841	-0.423419
HUXP1212D10	GBP2	guanylate binding protein 2, interferon-inducible	NM_004120	2634	11	1	-0.224485	-0.415928	-0.171374	-0.296215	-0.146942	-0.128894	-0.274027	0.0499758	-0.446019	-0.30641	-0.553364	-0.586311	-0.307267	-0.411528	-0.548483	-0.167893	-0.515365	-0.446927	-0.628312	-0.476092	0.380031	0.226079	-0.314537
SHR020060008G07	GNL1	guanine nucleotide binding protein-like 1	NM_005275	2794	11	1	0.118181	-0.499926	-0.00971515	-0.0975165	-0.183222	NaN	0.0173821	0.0710831	-0.205469	-0.428843	NaN	-1.07895	-0.490139	-0.540568	-0.879146	-0.609625	NaN	-0.459432	-0.843744	-0.944858	NaN	NaN	-0.584963
HUXP1010D12	HOXA2	homeobox A2	AK022839	3199	11	1	-0.150533	-0.328412	-0.172073	-0.26528	-0.189195	-0.170378	-0.254428	0.00644925	-0.554793	-0.283172	-0.453582	-0.458854	-0.210897	-0.345387	-0.515328	-0.295824	-0.391021	-0.314873	-0.328623	-0.327001	-0.105739	0.153728	-0.430876
HUXP1196G02	HOXA5	homeobox A5	NM_030661	3202	11	1	-0.0571994	-0.491601	-0.26111	-0.255119	-0.153805	-0.014532	0.110059	0.317436	-0.192972	-0.205917	-0.523484	-0.316276	-0.632716	-0.261206	-0.978404	-0.775595	-0.901486	-0.743225	-0.75681	-0.670893	-0.180741	0.369871	-0.362425
HUXP1164B03	HRG	histidine-rich glycoprotein	NM_000412	3273	11	1	-0.166854	-0.472936	0.00636391	-0.250414	0.0250464	-0.168821	0.212489	0.648746	-0.344973	-0.219069	-0.783066	-0.773325	-0.925418	-0.487102	-1.25994	-0.827374	-0.932174	-0.552641	-0.673265	-0.931627	0.779257	0.481478	-0.328849
HUXP1078G07	HES1	hairy and enhancer of split 1, (Drosophila)	NM_005524	3280	11	1	-0.0534393	-0.521051	-0.12063	-0.350186	-0.192645	-0.277985	-0.489966	0.314697	-0.204618	-0.552541	-0.498027	-0.645569	-0.697265	-0.608641	NaN	-0.0610756	-0.485427	-0.121015	-0.5157	-0.392317	-0.31034	NaN	-0.779734
HUXP1203H12	IGFBP1	insulin-like growth factor binding protein 1	NM_000596	3484	11	1	-0.182446	-0.558395	-0.243271	-0.492984	-0.295456	-0.229868	-0.269338	0.0243592	-0.502242	-0.466206	-0.557218	-0.471352	-0.207983	-0.325476	-0.643451	-0.275924	-0.480032	-0.578249	-0.384906	-0.51285	0.0156816	-0.05699	-0.52781
HUXP1199F12	ITIH1	inter-alpha (globulin) inhibitor H1	NM_002215	3697	11	1	-0.167024	-0.454032	-0.204712	-0.382011	-0.195231	-0.276218	-0.249709	0.0390912	-0.47314	-0.369843	-0.486334	-0.557635	-0.31652	-0.427083	-0.476808	-0.243827	-0.575317	-0.336703	-0.382323	-0.456104	0.0515303	0.160177	-0.530773
HUXP1048E10	ITIH4	inter-alpha (globulin) inhibitor H4 (plasma Kallikrein-sensitive glycoprotein)	NM_002218	3700	11	1	-0.291151	-0.415129	-0.1998	-0.320366	-0.215744	-0.226016	-0.18138	0.055648	-0.520205	-0.410471	-0.501047	-0.581741	-0.329081	-0.53666	-0.550733	-0.240748	-0.469594	-0.295578	-0.339992	-0.505591	0.00270421	-0.025571	-0.373353
HUXP1141D07	KARS	lysyl-tRNA synthetase	NM_005548	3735	11	1	-0.0838541	-0.246799	-0.132576	-0.416955	-0.166124	-0.30271	-0.0186759	0.207158	-0.238652	-0.198005	-0.567011	-0.466085	-0.459509	-0.290109	-0.748399	-0.526635	-0.614404	-0.330614	-0.458925	-0.391258	0.383212	0.383126	-0.260801
HUXP1167H09	MMP3	matrix metallopeptidase 3 (stromelysin 1, progelatinase)	NM_002422	4314	11	1	-0.207367	-0.513427	-0.246032	-0.473645	-0.225047	-0.152875	-0.231866	0.0606	-0.397453	-0.357967	-0.630523	-0.626092	-0.380184	-0.407	-0.668961	-0.29685	-0.49329	-0.444712	-0.398776	-0.409461	0.171611	-0.0824622	-0.319964
HUXP1085F02	NBL1	neuroblastoma, suppression of tumorigenicity 1	NM_005380	4681	11	1	-0.297392	-0.521456	-0.290549	-0.418477	-0.256596	-0.315085	-0.253969	0.0857608	-0.483926	-0.415037	-0.666576	-0.58932	-0.431283	-0.589767	-0.720784	-0.233133	-0.727042	-0.482405	-0.39199	-0.336691	-0.0790716	0.0509389	-0.484561
HUXP1119B11	NPR2	natriuretic peptide receptor B/guanylate cyclase B (atrionatriuretic peptide receptor B)	NM_003995	4882	11	1	-0.267696	-0.490859	-0.148662	-0.262147	-0.2862	-0.376497	-0.292181	-0.0529489	-0.246837	-0.376187	-0.51069	-0.630286	-0.379848	-0.58733	-0.500646	-0.318866	-0.444302	-0.297363	-0.503409	-0.342602	-0.290342	-0.0492225	-0.648572
HUXP1090G07	NUP98	nucleoporin 98kDa	NM_016320	4928	11	1	-0.149128	-0.291791	-0.212115	-0.257271	-0.322291	-0.310909	-0.227573	-0.04798	-0.45724	-0.29024	-0.653521	-0.654417	-0.224856	-0.443901	-0.453946	-0.122656	-0.426036	-0.347242	-0.307037	-0.478591	0.0265534	-0.00427466	-0.465256
HUXP1087C02	OMD	osteomodulin	NM_005014	4958	11	1	-0.130301	-0.412311	-0.183431	-0.422498	-0.241981	-0.243497	-0.278358	-0.0121308	-0.303259	-0.347142	-0.50787	-0.563074	-0.390337	-0.349921	-0.547488	-0.316184	-0.470768	-0.415037	-0.311872	-0.369912	0.0639273	0.132998	-0.410855
HUXP1015E03	PDCL	phosducin-like	NM_005388	5082	11	1	-0.0383322	-0.282857	-0.0434898	-0.431456	0.021077	-0.165259	-0.213755	0.101743	-0.386531	-0.34704	-0.337289	-0.632139	-0.423474	-0.173172	-0.325754	-0.33489	-0.451369	-0.67763	-0.339011	-0.419352	-0.204014	-0.203637	-0.364455
HUXP1176D11	PCK2	phosphoenolpyruvate carboxykinase 2 (mitochondrial)	NM_001018073	5106	11	1	-0.187299	-0.454543	-0.111194	-0.366128	-0.200996	-0.245056	-0.168843	0.0601898	-0.294192	-0.379311	-0.457864	-0.639079	-0.400594	-0.326833	-0.541388	-0.364145	-0.588496	-0.402774	-0.399893	-0.442771	0.071161	0.09586	-0.40876
HUXP1019D09	PCOLCE	procollagen C-endopeptidase enhancer	NM_002593	5118	11	1	-0.00703599	-0.299895	-0.0409762	-0.267416	-0.00502857	-0.0960065	0.125871	0.251953	-0.119987	-0.212734	-0.494154	-0.497248	-0.774642	-0.3543	-1.04735	-0.882191	-0.769718	-0.543861	-0.846075	-0.815359	0.434748	0.537106	-0.39648
HUXP1125D11	PCP4	Purkinje cell protein 4	NM_006198	5121	11	1	-0.116666	-0.355161	-0.219495	-0.32799	-0.241704	-0.181562	-0.219705	0.0825512	-0.327575	-0.371565	-0.422287	-0.514384	-0.347394	-0.537315	-0.487156	-0.267011	-0.453838	-0.481297	-0.418283	-0.547952	-0.286502	0.13473	-0.429301
HUXP1164E04	PDE6B	phosphodiesterase 6B, cGMP-specific, rod, beta (congenital stationary night blindness 3, autosomal dominant)	NM_000283	5158	11	1	-0.200994	-0.472644	-0.0728053	-0.257016	-0.300773	-0.174688	-0.194828	-0.0777342	-0.504779	-0.354139	-0.609697	-0.592083	-0.386175	-0.447048	-0.567403	-0.449448	-0.493563	-0.386895	-0.416149	-0.532674	-0.215124	-0.101161	-0.547619
HUXP1052D03	SERPINB6	serpin peptidase inhibitor, clade B (ovalbumin), member 6	NM_004568	5269	11	1	-0.155918	-0.632611	-0.249884	-0.577309	-0.374088	-0.309716	-0.358723	-0.0132055	-0.603419	-0.409999	-0.591276	-0.51307	-0.254529	-0.648375	-0.663475	-0.215073	-0.547617	-0.376422	-0.31062	-0.444268	0.046921	-0.20014	-0.467075
HUXP1048E03	39329	septin 4	NM_004574	5414	11	1	-0.1929	-0.206702	-0.220575	-0.249241	-0.338776	-0.361867	-0.206115	0.130478	-0.435796	-0.334956	-0.481533	-0.568399	-0.286244	-0.467585	-0.497261	-0.316987	-0.355095	-0.307244	-0.205516	-0.313722	-0.213514	-0.0311299	-0.296151
HUXP1109F06	ALDH18A1	aldehyde dehydrogenase 18 family, member A1	NM_001017423	5832	11	1	-0.154332	-0.266828	-0.0311589	-0.0991332	-0.204765	-0.248209	-0.172863	0.115541	-0.339774	-1.16668	-0.455965	-0.292499	-0.247327	-0.325426	-0.493335	-0.244622	-0.397343	-0.431564	-0.435428	-0.421542	-0.272953	-0.00723447	-0.318887
HUXP1105H06	RAB5B	RAB5B, member RAS oncogene family	NM_002868	5869	11	1	-0.0804015	-0.486903	-0.354814	-0.188399	-0.317788	-0.123441	-0.232977	-0.107484	-0.619129	-0.517184	-0.531191	-0.789845	-0.521567	-0.593546	-0.689998	-0.308793	-0.39822	-0.499846	-0.456457	-0.469929	-0.164722	-0.240204	-0.524544
HUXP1168D09	REV3L	REV3-like, catalytic subunit of DNA polymerase zeta (yeast)	NM_002912	5980	11	1	-0.157921	-0.390976	-0.096288	-0.369234	-0.248599	-0.19376	-0.209928	0.116127	-0.431173	-0.334867	-0.464736	-0.711523	-0.36083	-0.460435	-0.426669	-0.420982	-0.460978	-0.433578	-0.290092	-0.37963	0.00205805	-0.0254379	-0.439362
HUXP1106B09	RNASE1	ribonuclease, RNase A family, 1 (pancreatic)	NM_198232	6035	11	1	-0.271302	-0.41654	-0.179549	-0.368645	-0.35811	-0.30527	-0.260764	-0.0546353	-0.429988	-0.388943	-0.574236	-0.766713	-0.387622	-0.354747	-0.547094	-0.105436	-0.126316	-0.443301	-0.222392	-0.289507	-0.15389	-0.207022	-0.673822
HUXP1090G04	SCN9A	sodium channel, voltage-gated, type IX, alpha	NM_002977	6335	11	1	-0.118625	-0.408055	-0.155543	-0.22323	-0.224048	-0.154519	-0.301243	0.0516999	-0.430894	-0.364375	-0.522686	-0.629421	-0.367885	-0.358187	-0.542089	-0.32085	-0.498035	-0.262538	-0.440022	-0.520864	-0.245662	0.224535	-0.465441
HUXP1129F05	SEC14L1	SEC14-like 1 (S. cerevisiae)	NM_003003	6397	11	1	-0.228146	-0.31829	-0.22161	-0.271457	-0.207059	-0.220602	-0.212035	0.0686764	-0.477111	-0.378512	-0.487064	-0.579462	-0.337798	-0.480343	-0.561172	-0.28615	-0.334177	-0.406452	-0.478882	0.200788	-0.177396	-0.335301	-0.468059
HUXP1212G12	SFRS3	splicing factor, arginine/serine-rich 3	NM_003017	6428	11	1	-0.153979	-0.218031	-0.114308	-0.376123	-0.164391	-0.187904	-0.127104	0.102177	-0.27	-0.18874	-0.347091	-0.53179	-0.124249	-0.331092	-0.563	-0.388491	-0.538258	-0.405513	-0.492322	-0.374805	-0.125872	0.0474939	-0.400084
HUXP1204H08	SLC1A2	solute carrier family 1 (glial high affinity glutamate transporter), member 2	NM_004171	6506	11	1	-0.122993	-0.409316	-0.20741	-0.388082	-0.303567	-0.28411	-0.33635	0.0627189	-0.212167	-0.420542	-0.543664	-0.609502	-0.339137	-0.289507	-0.5144	-0.373727	-0.411497	-0.376334	-0.440864	-0.312411	0.0324215	0.140567	-0.330612
HUXP1197A11	SNAPC1	small nuclear RNA activating complex, polypeptide 1, 43kDa	NM_003082	6617	11	1	-0.161953	-0.357319	-0.243077	-0.392208	-0.156449	-0.207134	-0.254094	0.000728082	-0.363864	-0.268085	-0.615528	-0.45852	-0.346052	-0.311643	-0.612334	-0.283793	-0.629139	-0.507689	-0.313368	-0.387387	-0.544156	0.894633	-0.463195
HUXP1126B11	SOX4	SRY (sex determining region Y)-box 4	NM_003107	6659	11	1	-0.350497	-0.375291	-0.147754	-0.190822	0.062061	0.0299532	0.0411052	-0.115477	NaN	-0.440573	-0.379704	-0.746552	-0.873552	-0.480166	NaN	-0.532419	-0.263034	NaN	-0.301381	-0.678072	-0.368151	NaN	-0.463567
HUXP1017G07	SOX10	SRY (sex determining region Y)-box 10	NM_006941	6663	11	1	-0.106311	-0.348474	-0.104625	-0.231277	-0.187832	-0.143228	-0.133945	0.0653825	-0.409211	-0.347215	-0.546668	-0.460361	-0.219609	-0.30507	-0.378556	-0.43351	-0.46604	-0.468931	-0.387673	-0.509137	-0.206451	-0.131224	-0.516688
HUXP1059E12	SPOCK1	sparc/osteonectin, cwcv and kazal-like domains proteoglycan (testican) 1	NM_004598	6695	11	1	-0.0743954	-0.166378	-0.116972	-0.443481	-0.210666	-0.195714	-0.12665	0.0147108	-0.333424	-0.446867	-0.288984	-0.521064	-0.217681	-0.180456	-0.504208	-0.363063	-0.435056	-0.399577	-0.396422	-0.485427	0.00690286	0.124679	-0.31034
HUXP1200A12	C2orf3	chromosome 2 open reading frame 3	NM_003203	6936	11	1	-0.133483	-0.357704	-0.0906983	-0.247553	-0.189398	-0.160773	-0.14274	0.0318254	-0.470381	-0.206052	-0.548621	-0.396201	-0.30465	-0.436099	-0.318888	-0.293731	-0.452512	-0.356338	-0.328764	-0.225972	-0.198329	-0.127756	-0.313289
HUXP1106F05	THBS3	thrombospondin 3	NM_007112	7059	11	1	-0.0655883	-0.956931	NaN	-0.837943	-0.378512	NaN	NaN	NaN	NaN	-0.510962	-0.590609	NaN	-0.719892	-0.1836	-0.676212	-0.542318	-0.606179	-0.492598	-0.215389	-0.35925	-0.0335526	-0.146841	-0.330473
HUXP1043C04	TNR	tenascin R (restrictin, janusin)	NM_003285	7143	11	1	-0.160998	-0.463638	-0.162395	-0.310859	-0.250444	-0.232077	-0.27208	0.0725914	-0.348522	-0.35826	-0.53442	-0.45537	-0.33534	-0.607191	-0.534296	-0.241603	-0.507484	-0.407935	-0.400217	-0.422213	-0.105972	0.0478692	-0.331889
HUXP1042B04	VTN	vitronectin	NM_000638	7448	11	1	-0.283793	-0.1582	0.127192	-0.155736	-0.178053	-0.112059	-0.185867	0.150492	-0.132894	-0.364875	-0.628031	-0.658963	-0.201634	-0.380744	-0.742842	-0.481709	-0.452512	-0.447459	-0.402632	-0.378512	-0.271302	-0.0944647	-0.421827
HUXP1018C01	XRCC4	X-ray repair complementing defective repair in Chinese hamster cells 4	NM_022406	7518	11	1	-0.282222	-0.47592	-0.281528	-0.538148	-0.316542	-0.363638	-0.415037	-0.299145	-0.569021	-0.539583	-0.561504	-0.588468	-0.415037	-0.293612	-0.636252	-0.484896	-0.412647	-0.494765	-0.388854	NaN	-0.403356	-0.0843922	-0.536716
HUXP1080D10	RNGTT	RNA guanylyltransferase and 5'-phosphatase	NM_003800	8732	11	1	-0.162678	-0.245093	-0.249433	-0.371247	-0.171889	-0.147644	-0.178694	0.0621271	-0.356664	-0.333061	-0.335986	-0.565037	-0.386527	-0.259979	-0.432863	-0.332289	-0.356181	-0.375337	-0.506412	-0.429944	-0.0747678	0.0641303	-0.352789
SHR020060012E01	LDB1	LIM domain binding 1	NM_003893	8861	11	1	0.0297473	-0.616085	-0.195324	NaN	-0.187763	-0.228106	-0.272685	-0.584963	-0.375867	-0.466021	-0.240359	NaN	-0.758992	-0.289507	-0.690896	-0.620713	-0.831992	NaN	-0.969987	-0.856965	NaN	0.304257	-0.290779
HUXP1016E07	HERC3	hect domain and RLD 3	NM_014606	8916	11	1	-0.162645	-0.523013	-0.0425889	-0.309955	-0.0876527	-0.198981	-0.0311914	0.218559	-0.349684	-0.268551	-0.637647	-0.618196	-0.657257	-0.433278	-0.890454	-0.592221	-0.69997	-0.533208	-0.419208	-0.535311	0.409435	0.170227	-0.288122
HUXP1090B09	MYOT	myotilin	NM_006790	9499	11	1	-0.160673	-0.237499	-0.0991754	-0.367957	-0.06501	-0.292697	-0.12843	0.095836	-0.365898	-0.281818	-0.380678	-0.377907	-0.293824	-0.199378	-0.613942	-0.293196	-0.51307	-0.377337	-0.402654	-0.505984	0.0365259	0.121929	-0.390834
HUXP1124C05	KIAA0773	KIAA0773 gene product	NM_014690	9715	11	1	-0.244938	-0.365973	-0.115683	-0.324036	-0.203786	-0.204014	-0.260657	0.0531162	-0.55169	-0.532405	-0.626886	-0.617902	-0.346761	-0.414106	-0.477482	-0.306307	-0.380239	-0.285023	-0.407627	-0.479443	-0.0658606	0.121626	-0.178881
HUXP1018E12	KIAA0247	KIAA0247	NM_014734	9766	11	1	-0.0236877	-0.424522	-0.0925492	-0.335891	-0.301262	-0.259311	-0.186059	0.141818	-0.253705	-0.301381	-0.436709	-0.559379	-0.522307	-0.394542	-0.472143	-0.331995	-0.599747	-0.351025	-0.273549	-0.379822	0.204403	0.121562	-0.258771
HUXP1090E10	TATDN2	TatD DNase domain containing 2	NM_014760	9797	11	1	-0.194454	-0.39208	-0.20787	-0.304313	-0.167594	-0.243276	-0.167879	0.0728642	-0.310039	-0.353249	-0.559018	-0.634867	-0.412095	-0.497163	-0.649477	-0.483679	-0.782834	-0.501472	-0.52849	-0.558622	0.0310269	-0.032799	-0.450091
HUXP1057H11	FARP2	FERM, RhoGEF and pleckstrin domain protein 2	NM_014808	9855	11	1	-0.246874	-0.398808	-0.145183	-0.291984	-0.153371	-0.153939	-0.295061	0.100337	-0.389514	-0.308227	-0.57065	-0.5904	-0.283136	-0.587849	-0.528939	-0.239062	-0.503941	-0.456737	-0.340087	-0.445016	-0.169438	0.0893856	-0.441004
SHR020061021A03	TBC1D4	TBC1 domain family, member 4	NM_014832	9882	11	1	0.0289514	-0.410838	-0.383673	-0.262273	0.153431	-0.0528519	-0.183757	-0.0456226	-0.350186	-0.415037	-0.292553	-0.291766	-0.578173	-0.526748	-0.534839	-0.476438	-0.27024	-0.331206	-0.129158	-0.272862	-0.242424	0.175639	-0.490589
HUXP1048A09	IQSEC1	IQ motif and Sec7 domain 1	NM_014869	9922	11	1	-0.224483	-0.429526	-0.168123	-0.237203	-0.210276	-0.171991	-0.298361	0.0540571	-0.383868	-0.244529	-0.496074	-0.56045	-0.48619	-0.511961	-0.544712	-0.199309	-0.31075	-0.284911	-0.330928	-0.368059	0.132524	0.0630098	-0.404306
SHR020060016F07	ROD1	ROD1 regulator of differentiation 1 (S. pombe)	NM_005156	9991	11	1	NaN	-0.733354	-0.426265	-0.378512	-0.395301	NaN	-0.292977	-0.364572	NaN	-0.512951	NaN	-0.981853	-0.447459	-0.0824622	-0.728928	-0.483038	-0.643856	-0.70044	-0.802319	-0.88789	0.230006	0.307429	-0.278102
HUXP1131D09	SAE2	SUMO1 activating enzyme subunit 2	NM_005499	10054	11	1	-0.155241	-0.34423	-0.0855368	-0.267577	-0.204048	-0.270224	-0.144586	-0.00308763	-0.279757	-0.302777	-0.419699	-0.430225	-0.461818	-0.279379	-0.342687	-0.402244	-0.490664	-0.444619	-0.325784	-0.299911	-0.169384	-0.0984065	-0.347775
HUXP1131G06	PRG4	proteoglycan 4	NM_005807	10216	11	1	-0.223368	-0.377377	-0.209923	-0.354941	-0.252397	-0.273451	-0.301262	0.0342157	-0.3627	-0.374086	-0.559512	-0.574881	-0.398852	-0.272346	-0.514029	-0.397196	-0.494854	-0.457814	-0.375314	-0.434991	-0.0859375	0.0471614	-0.3878
SHR020061029B03	KATNB1	katanin p80 (WD repeat containing) subunit B 1	NM_005886	10300	11	1	-0.238512	-0.372333	-0.277985	-0.211504	0.102686	NaN	0.177346	NaN	NaN	-0.415037	-0.560715	NaN	-0.655089	-0.298224	-0.744161	-0.526546	-0.446256	-0.432959	-0.85599	-0.632268	-0.217231	0.247928	NaN
HUXP1011C09	YAP1	Yes-associated protein 1, 65kDa	NM_006106	10413	11	1	-0.168747	-0.423274	-0.204611	-0.296954	-0.152425	-0.216639	-0.269154	0.0334718	-0.594039	-0.355297	-0.515022	-0.56386	-0.378173	-0.468304	-0.492315	-0.299317	-0.42379	-0.333203	-0.392281	-0.431317	-0.114667	0.0206409	-0.409008
HUXP1031A10	TOMM40	translocase of outer mitochondrial membrane 40 homolog (yeast)	NM_001645	10452	11	1	-0.164415	-0.401112	-0.134553	-0.289862	-0.201291	-0.236593	-0.187746	0.10378	-0.388142	-0.395004	-0.501867	-0.422455	-0.169712	-0.374514	-0.487294	-0.284327	-0.276878	-0.426836	-0.140178	-0.341171	-0.142253	-0.231698	-0.538198
SHR020061025C06	GMEB1	glucocorticoid modulatory element binding protein 1	NM_024482	10691	11	1	-0.146841	-0.348454	-0.285252	-0.605282	-0.136137	-0.26939	-0.131245	-0.306889	-0.312384	-0.376721	-0.174903	-0.643856	-0.392317	-0.364411	-0.480166	-0.615769	-0.570887	NaN	-0.630766	-0.509328	-0.123735	0.078712	-0.261328
HUXP1015D10	UTS2	urotensin 2	NM_006786	10911	11	1	-0.10572	-0.234167	0.00859034	-0.422204	0.0198141	-0.134196	0.0310454	0.485169	-0.146789	-0.149696	-0.377842	-0.361831	-0.605264	-0.208956	-0.680932	-0.552488	-0.54858	-0.381933	-0.489898	-0.370059	-0.00914548	0.17702	-0.27579
HUXP1090F07	SLC27A4	solute carrier family 27 (fatty acid transporter), member 4	NM_005094	10999	11	1	-0.0698149	-0.173784	-0.198705	-0.159323	-0.154704	-0.144727	-0.197071	0.0497605	-0.3583	-0.288036	-0.54098	-0.631007	-0.289443	-0.574606	-0.681235	-0.229908	-0.480005	-0.451148	-0.355942	-0.523562	0.281771	0.161033	-0.333165
HUXP1121G10	ADAMTS13	ADAM metallopeptidase with thrombospondin type 1 motif, 13	NM_139027	11093	11	1	-0.171685	-0.352407	-0.0726952	-0.150073	-0.0112858	-0.349267	-0.00708942	0.264341	-0.459702	-0.133441	-0.531682	-0.579892	-0.721155	-0.360102	-0.979822	-0.532607	-0.916727	-0.619919	-0.902445	-0.954834	0.135655	0.247218	-0.50564
HUXP1162C11	ZNF510	zinc finger protein 510	NM_014930	22869	11	1	-0.229293	-0.329741	0.00694161	-0.168885	-0.273162	-0.212819	-0.206015	0.0532834	-0.567156	-0.250013	-0.397136	-0.471451	-0.324793	-0.36589	-0.445834	-0.205663	-0.440686	-0.392166	-0.332943	-0.460673	-0.197037	0.134865	-0.251898
HUXP1016C12	FNBP1	formin binding protein 1	NM_015033	23048	11	1	-0.252842	-0.309729	0.00480099	-0.169414	-0.160644	-0.205146	-0.152596	NaN	-0.209085	-0.460528	-0.505341	-0.691308	-0.502142	-0.193454	-0.567773	-0.280575	-0.364103	-0.242556	-0.351628	-0.277007	-0.10212	0.27262	-0.49317
HUXP1199E06	TTLL5	tubulin tyrosine ligase-like family, member 5	NM_015072	23093	11	1	-0.230323	-0.43853	-0.334627	-0.362476	-0.227301	-0.222305	-0.286351	-0.0595765	-0.457753	-0.466946	-0.339042	-0.35925	-0.374074	-0.429421	-0.550364	-0.418635	-0.409735	-0.415219	-0.326384	-0.397142	-0.251773	-0.24888	-0.487779
HUXP1010D06	SNF1LK2	SNF1-like kinase 2	AV703585	23235	11	1	-0.24213	-0.316193	-0.133961	-0.275664	-0.207411	-0.206967	-0.176358	0.0520108	-0.448486	-0.282958	-0.499432	-0.503958	-0.434862	-0.476327	-0.653845	-0.37955	-0.445717	-0.38819	-0.365455	-0.495617	-0.113063	-0.0455795	-0.392023
HUXP1064E12	LEMD3	LEM domain containing 3	NM_014319	23592	11	1	-0.305178	-0.314267	-0.141943	-0.378822	-0.195955	-0.200884	-0.262076	-0.164431	-0.445917	-0.378787	-0.38813	-0.361833	-0.276604	-0.471539	-0.524745	-0.293139	-0.465381	-0.587546	-0.339727	-0.534689	-0.365813	-0.0719498	-0.676705
HUXP1022H05	AMACR	alpha-methylacyl-CoA racemase	NM_014324	23600	11	1	-0.0549398	-0.134895	-0.152724	-0.516791	-0.155518	-0.233477	-0.205039	0.0625491	-0.547488	-0.281141	-0.240379	-0.649338	-0.314895	-0.198717	-0.535241	-0.454876	-0.515305	-0.576345	-0.359267	-0.455548	-0.116477	-0.129768	-0.460156
HUXP1061H01	PLD3	phospholipase D family, member 3	NM_012268	23646	11	1	-0.340655	-0.436099	-0.268489	-0.376268	-0.497864	-0.349689	-0.211107	-0.333424	-0.36257	-0.251062	-0.67021	-0.726624	-0.456229	-0.319229	-0.70044	-0.272297	-0.339024	NaN	-0.164631	-0.321928	0.266646	-0.0780025	-0.329124
HUXP1011E08	C3orf17	chromosome 3 open reading frame 17	NM_015412	25871	11	1	-0.211035	-0.321998	-0.153112	-0.213165	-0.216306	-0.197604	-0.272498	0.0127173	-0.440503	-0.319376	-0.443446	-0.423662	-0.374691	-0.437125	-0.456986	-0.155811	-0.401035	-0.389247	-0.243165	-0.415327	-0.218698	0.23023	-0.339496
HUXP1027B03	CNNM3	cyclin M3	NM_017623	26505	11	1	-0.0347654	-0.2511	-0.065223	-0.11144	0.00854933	-0.101856	0.0371885	0.260764	-0.239827	-0.174574	-0.530342	-0.515902	-0.401199	-0.329726	-0.826843	-0.280108	-0.87006	-0.455916	-0.605261	-0.590562	0.252766	0.24823	-0.340978
SHR020061033C03	CLEC2D	C-type lectin domain family 2, member D	NM_013269	29121	11	1	-0.0906025	-0.543315	-0.479743	-0.411978	-0.487352	-0.220266	-0.228819	-0.0300572	NaN	NaN	-0.620586	NaN	-0.483816	-0.265461	-0.351472	-0.474442	-0.0941222	NaN	-0.348895	-0.44514	NaN	0.155278	-0.295007
HUXP1015D06	ERAF	erythroid associated factor	NM_016633	51327	11	1	-0.106154	-0.302249	-0.144874	-0.373134	-0.167662	-0.0327202	-0.198886	0.038264	-0.375109	-0.316451	-0.526533	-0.491287	-0.42283	-0.322508	-0.424854	-0.491388	-0.456343	-0.427025	-0.378075	-0.386891	-0.329766	-0.151701	-0.204184
HUXP1042G12	BIRC4BP	XIAP associated factor-1	NM_199139	54739	11	1	-0.237902	-0.417418	-0.340075	-0.225528	-0.192964	-0.254608	-0.281068	0.0603429	-0.309227	-0.163499	-0.416546	-0.436906	-0.321391	-0.5077	-0.646363	-0.227547	-0.348821	-0.403944	-0.136635	-0.344759	-0.104157	-0.235216	-0.42303
HUXP1121B12	RG9MTD1	RNA (guanine-9-) methyltransferase domain containing 1	NM_017819	54931	11	1	-0.195747	-0.285708	-0.247928	-0.269766	-0.199076	-0.212031	-0.177342	-0.0921849	-0.323225	-0.270679	-0.309232	-0.519515	-0.391407	-0.396726	-0.57243	-0.593506	-0.559918	-0.402788	-0.503301	-0.448635	-0.164854	-0.074171	-0.340408
HUXP1044C08	RIC8B	resistance to inhibitors of cholinesterase 8 homolog B (C. elegans)	NM_018157	55188	11	1	-0.33383	-0.227952	-0.0814276	-0.377826	-0.205675	-0.255584	-0.305307	0.0905719	-0.399149	-0.415358	-0.58993	-0.529006	-0.280552	-0.421741	-0.500404	-0.141261	-0.416151	-0.204131	-0.318176	-0.489449	-0.163274	0.0288895	-0.257388
HUXP1083F09	SMPD3	sphingomyelin phosphodiesterase 3, neutral membrane (neutral sphingomyelinase II)	NM_018667	55512	11	1	-0.091031	-0.443196	-0.328512	-0.425355	-0.265781	-0.302527	-0.27387	-0.0606628	-0.466021	-0.324978	-0.601907	-0.58803	-0.390727	-0.523887	-0.68613	-0.353232	-0.452325	-0.39141	-0.415961	-0.477072	-0.131673	0.0634254	-0.427701
HUXP1191H12	MAML3	mastermind-like 3 (Drosophila)	NM_018717	55534	11	1	-0.212254	-0.445989	-0.222263	-0.429574	-0.210939	-0.252032	-0.211423	0.00362486	-0.44917	-0.358048	-0.507132	-0.556061	-0.331445	-0.325412	-0.60738	-0.255166	-0.464847	-0.413647	-0.410409	-0.441103	-0.00765357	0.0870986	-0.424424
HUXP1079A04	LOC55565	hypothetical protein LOC55565	NM_017530	55565	11	1	-0.269187	-0.390673	-0.269187	-0.30189	-0.147677	-0.474442	-0.118836	-0.0880562	-0.213244	-0.551796	-0.655352	-0.66458	-0.217152	-0.471824	-0.601082	-0.227952	-0.421464	-0.458106	-0.246512	-0.382146	0	0.0970245	-0.212729
HUXP1019D04	HHAT	hedgehog acyltransferase	NM_018194	55733	11	1	-0.199009	-0.358631	-0.198329	-0.309169	-0.297297	-0.249451	-0.135401	-0.116598	-0.425817	-0.565309	-0.723576	-0.589624	-0.236067	-0.441904	-0.65973	-0.231564	-0.581448	-0.47022	-0.685402	-0.598312	NaN	-0.0801703	-0.654225
HUXP1003C06	ZNF415	zinc finger protein 415	NM_018355	55786	11	1	-0.181353	-0.274842	-0.16067	-0.23173	-0.229156	-0.187919	-0.254929	-0.00551466	-0.498235	-0.283367	-0.547226	-0.534657	-0.370131	-0.463567	-0.563205	-0.291709	-0.410369	-0.393255	-0.356935	-0.350544	-0.0329146	0.054318	-0.394532
HUXP1053G07	SCN3B	sodium channel, voltage-gated, type III, beta	Hs.4865	55800	11	1	-0.364837	-0.224002	0	-0.265636	-0.34001	-0.219781	-0.106915	0.358631	-0.433987	-0.142444	-0.570056	-0.507296	-0.257798	-0.272562	-0.631437	-0.0891524	-0.449896	-0.148596	-0.200224	-0.4236	-0.185867	0.0458037	-0.342232
HUXP1076H12	PSENEN	presenilin enhancer 2 homolog (C. elegans)	NM_172341	55851	11	1	0.0804187	-0.300045	-0.0466932	-0.244569	0.0455626	-0.240051	-0.110558	0.248388	-0.169925	-0.270089	NaN	-0.441269	-0.259087	-0.791758	-0.704802	-0.405854	-0.47032	-0.420108	-0.495738	-0.266646	NaN	0.37468	-0.219313
HUXP1017F06	WDR45L	WDR45-like	NM_019613	56270	11	1	-0.0971382	-0.335195	-0.0864482	-0.234275	-0.130097	-0.176878	-0.0590544	0.185314	-0.257271	-0.180483	-0.449567	-0.37664	-0.332277	-0.297998	-0.551524	-0.192744	-0.625509	-0.396586	-0.349147	-0.570769	-0.0623484	0.170014	-0.381958
HUXP1109E04	C3orf9	chromosome 3 open reading frame 9	NM_152305	56983	11	1	-0.111503	-0.396208	-0.0248256	-0.234403	-0.0464094	-0.156885	-0.0726453	0.274526	-0.23438	-0.154571	-0.620453	-0.571262	-0.614414	-0.302847	-0.640168	-0.166862	-0.839515	-0.742146	-0.634891	-1.00673	-0.158857	0.355367	-0.518258
HUXP1020H05	SAS10	disrupter of silencing 10	NM_020368	57050	11	1	-0.1627	-0.383481	-0.238974	-0.462452	-0.271394	-0.239357	-0.217443	0.0616155	-0.39165	-0.393276	-0.469357	-0.662125	-0.135746	-0.363624	-0.509426	-0.473484	-0.376422	-0.552258	-0.311698	-0.214092	-0.172613	-0.200417	-0.370777
HUXP1152C09	VN1R1	vomeronasal 1 receptor 1	NM_001024596	57191	11	1	-0.330845	-0.28883	-0.18124	-0.280736	-0.285139	-0.318582	-0.230452	0.0946369	-0.537078	-0.465664	-0.510881	-0.458415	-0.374279	-0.478375	-0.723861	-0.378835	-0.403146	-0.37388	-0.267341	-0.386082	NaN	-0.149984	-0.353393
HUXP1090C05	MTUS1	mitochondrial tumor suppressor 1	NM_020749	57509	11	1	-0.251012	-0.546909	-0.36796	-0.480659	-0.21612	-0.171095	-0.25441	-0.0766213	-0.443472	-0.331906	-0.590773	-0.477838	-0.409334	-0.535657	-0.632921	-0.501428	-0.415622	-0.282934	-0.393641	-0.525603	-0.386634	0.206313	-0.53564
HUXP1066G07	KIAA1324	KIAA1324	NM_020775	57535	11	1	-0.213039	-0.397242	-0.190118	-0.286073	-0.154825	-0.241253	-0.26637	0.0593445	-0.385398	-0.392485	-0.56927	-0.598637	-0.353913	-0.521684	-0.578003	-0.267426	-0.422455	-0.36101	-0.502954	-0.492561	0.00621852	0.121508	-0.305667
HUXP1109F05	PERP	PERP, TP53 apoptosis effector	NM_022121	64065	11	1	-0.232041	-0.39427	-0.241857	-0.245235	-0.146646	-0.172732	-0.284568	0.098734	-0.388221	-0.232685	-0.521554	-0.60713	-0.231031	-0.371241	-0.527582	-0.216548	-0.571681	-0.471205	-0.646509	-0.549362	-0.109731	0.346155	-0.326597
HUXP1162H12	RRAGC	Ras-related GTP binding C	AF131773	64121	11	1	-0.241363	-0.335759	-0.172496	-0.228211	-0.176662	-0.195208	-0.195826	0.0563509	-0.450754	-0.387781	-0.558967	-0.59427	-0.360181	-0.398031	-0.654117	-0.261954	-0.389535	-0.339698	-0.437885	-0.456102	-0.0665831	0.0919686	-0.326845
HUXP1043B02	C1orf80	chromosome 1 open reading frame 80	Hs.534965	64853	11	1	-0.185056	-0.186347	-0.123792	-0.287827	-0.338289	-0.328814	-0.343119	-0.017114	-0.509195	-0.34851	-0.535159	-0.558697	-0.352916	-0.50272	-0.351605	-0.344203	-0.303499	-0.353902	-0.142253	-0.287896	-0.298792	-0.169399	-0.387095
HUXP1090B12	CBLL1	Cas-Br-M (murine) ecotropic retroviral transforming sequence-like 1	NM_024814	79872	11	1	-0.146564	-0.446417	-0.144573	-0.382199	-0.111979	-0.241008	-0.14944	0.0675833	-0.484314	-0.322853	-0.465848	-0.559618	-0.368958	-0.377587	-0.52754	-0.354369	-0.545768	-0.50057	-0.406746	-0.453764	0.0172436	0.0173144	-0.456317
HUXP1055B06	MAGED4	melanoma antigen family D, 4	NM_177537	81557	11	1	-0.278431	-0.447801	-0.180365	-0.40864	-0.218269	-0.330773	-0.193295	0.165695	-0.423211	-0.283212	-0.612184	-0.645043	-0.361932	-0.407948	-0.55283	-0.280614	-0.455166	-0.357157	-0.360555	-0.500968	-0.119299	0.0459754	-0.709475
HUXP1078E01	TRIM8	tripartite motif-containing 8	NM_030912	81603	11	1	-0.215845	-0.216667	-0.196057	-0.312173	-0.0810752	-0.138033	-0.117315	0.240887	-0.433486	-0.425973	-0.545633	-0.478164	-0.277775	-0.495589	-0.43185	-0.229617	-0.212321	-0.306035	-0.231238	-0.373392	-0.180873	-0.250751	-0.500887
HUXP1102B11	SETDB2	SET domain, bifurcated 2	NM_031915	83852	11	1	-0.199335	-0.385383	-0.0708609	-0.233925	-0.215027	-0.199628	-0.2601	0.00977366	-0.306288	-0.435171	-0.455585	-0.540424	-0.30299	-0.359518	-0.551292	-0.431925	-0.343414	-0.342445	-0.40754	-0.221573	-0.00566875	0.0808878	-0.394998
HUXP1106E01	TATDN1	TatD DNase domain containing 1	NM_032026	83940	11	1	-0.249787	-0.469485	-0.132805	-0.213926	-0.330571	-0.275634	-0.204608	-0.0784491	-0.259552	-0.477159	-0.39626	-0.378261	-0.422075	-0.400009	-0.446473	-0.288074	-0.541477	-0.216636	-0.359384	-0.393421	-0.15874	0.319836	-0.547327
HUXP1109E02	PCGF5	polycomb group ring finger 5	NM_032373	84333	11	1	-0.226303	-0.474958	-0.271546	-0.25012	-0.163098	-0.247331	-0.293731	0.105888	-0.415665	-0.281637	-0.533489	-0.492579	-0.335149	-0.390473	-0.548115	-0.285763	-0.43518	-0.471731	-0.309356	-0.426208	-0.16109	0.00867644	-0.390051
HUXP1179D09	PHACS	1-aminocyclopropane-1-carboxylate synthase	NM_032592	84680	11	1	-0.161751	-0.485427	-0.104211	-0.567808	-0.321928	-0.288431	-0.226135	-0.0995357	-0.357813	-0.517058	-0.332196	-0.588418	-0.445032	-0.24716	-0.404149	-0.0824622	-0.415037	-0.497073	-0.281868	-0.264703	NaN	-0.24731	-0.330149
HUXP1171D11	CORO6	coronin 6	NM_032854	84940	11	1	-0.157918	-0.788779	-0.403747	-0.716453	-0.337138	-0.33985	-0.407714	0.0702058	-0.418691	-0.428002	-0.535988	-0.624032	-0.482942	-0.350955	-0.668232	-0.44174	-0.416612	-0.450469	-0.294324	-0.584963	0.239007	0.0169731	-0.572362
HUXP1089F03	TNFRSF19L	tumor necrosis factor receptor superfamily, member 19-like	NM_032871	84957	11	1	-0.0912719	-0.32227	-0.116345	-0.331363	-0.136514	-0.197351	-0.157691	0.137178	-0.451008	-0.282096	-0.495527	-0.547628	-0.385654	-0.331451	-0.531249	-0.322484	-0.584688	-0.419926	-0.365868	-0.485553	0.117228	0.182876	-0.410717
HUXP1204D10	TRIM5	tripartite motif-containing 5	NM_033093	85363	11	1	-0.124943	-0.455636	-0.147419	-0.44789	-0.220526	-0.211722	-0.230447	0.185257	-0.20814	-0.373204	-0.492462	-0.578663	-0.478561	-0.273695	-0.353989	-0.221773	-0.332993	-0.323755	-0.358177	-0.334199	-0.335984	0.0702235	-0.44579
HUXP1090H03	RGS8	regulator of G-protein signalling 8	AL359941	85397	11	1	-0.16768	-0.556969	-0.192468	-0.396025	-0.273798	-0.29192	-0.267275	-0.0217546	-0.4667	-0.414549	-0.618379	-0.567808	-0.453458	-0.487473	-0.625674	-0.497619	-0.395181	-0.452222	-0.272221	-0.609002	-0.0761717	0.00548033	-0.560245
HUXP1017E06	RSAD2	radical S-adenosyl methionine domain containing 2	NM_080657	91543	11	1	-0.212545	-0.220948	-0.444708	-0.350665	-0.16549	-0.210829	-0.120854	0.0255004	-0.20581	-0.224354	-0.335095	-0.503195	-0.197577	-0.250659	-0.29492	-0.272963	-0.277129	-0.305745	-0.408905	-0.646231	-0.0999188	-0.129807	-0.511673
HUXP1090D09	B3GNT7	UDP-GlcNAc:betaGal beta-1,3-N-acetylglucosaminyltransferase 7	Hs.299329	93010	11	1	-0.214782	-0.413463	-0.259469	-0.3715	-0.170416	-0.267884	-0.211311	0.0127447	-0.357157	-0.238146	-0.569059	-0.567054	-0.388037	-0.363759	-0.684061	-0.426847	-0.617578	-0.487847	-0.423927	-0.483312	-0.120086	-0.0982465	-0.402866
HUXP1020A09	ZBTB46	zinc finger and BTB domain containing 46	NM_025224	140685	11	1	-0.156623	-0.491536	-0.244303	-0.318176	-0.239351	-0.250669	-0.241883	0.0416446	-0.518707	-0.318405	-0.548539	-0.586249	-0.372199	-0.478185	-0.504119	-0.255229	-0.500472	-0.319528	-0.333376	-0.500325	-0.0380133	0.319816	-0.402528
HUXP1049G08	TMEM37	transmembrane protein 37	Hs.26216	140738	11	1	-0.203533	-0.356671	-0.203619	-0.342045	-0.199309	-0.209847	-0.186743	-0.0408337	-0.458993	-0.284977	-0.514573	-0.514573	-0.33138	-0.57197	-0.479505	-0.275258	-0.477502	-0.459151	-0.275985	-0.447247	-0.290901	0.0241125	-0.583342
HUXP1019B09	CABP7	calcium binding protein 7	NM_182527	164633	11	1	-0.085289	-0.425306	-0.0774914	-0.368528	-0.0655387	-0.121109	-0.0308374	0.209328	-0.27711	-0.290382	-0.42237	-0.592673	-0.667053	-0.35811	-0.744369	-0.577958	-0.879013	-0.295526	-0.461621	-0.5955	0.542671	0.650093	-0.325216
HUXP1109E03	COMMD6	COMM domain containing 6	NM_203495	170622	11	1	-0.260253	-0.406184	-0.223524	-0.103166	-0.250996	-0.276496	-0.307602	-0.0712046	-0.526332	-0.335029	-0.589134	-0.483671	-0.438135	-0.553628	-0.512833	-0.458519	-0.492664	-0.411567	-0.335603	-0.413495	-0.28564	-0.0447134	-0.293159
HUXP1016E10	POLR2J2	DNA directed RNA polymerase II polypeptide J-related gene	NM_014147	246721	11	1	-0.161116	-0.395118	-0.184875	-0.272028	-0.126598	-0.18358	-0.15078	0.161003	-0.305922	-0.225315	-0.572072	-0.587946	-0.433126	-0.483813	-0.676068	-0.459152	-0.576918	-0.426061	-0.370145	-0.53855	0.257388	0.288436	-0.369703
HUXP1183A12	IBRDC2	IBR domain containing 2	NM_182757	255488	11	1	-0.149714	-0.470414	-0.173796	-0.373828	-0.197471	-0.260912	-0.227087	-0.0417977	-0.424614	-0.280604	-0.507955	-0.576266	-0.346423	-0.355572	-0.646097	-0.289938	-0.413789	-0.4335	-0.40343	-0.5594	0	0.0798822	-0.417537
HUXP1197E03	RPL7L1	ribosomal protein L7-like 1	Hs.520133	285855	11	1	-0.143954	-0.341903	-0.0397401	-0.117133	-0.161938	-0.234572	-0.130424	0.152383	-0.378909	-0.283393	-0.469951	-0.329388	-0.281297	-0.375805	-0.534985	-0.306548	-0.489219	-0.422124	-0.429847	-0.518575	-0.289507	-0.129894	-0.321761
HUXP1010H05	MMAB	methylmalonic aciduria (cobalamin deficiency) cblB type	NM_052845	326625	11	1	-0.0966658	-0.298931	-0.181942	-0.262905	-0.207218	-0.187656	-0.244135	0.0381351	-0.419867	-0.334765	-0.448964	-0.511965	-0.270817	-0.457573	-0.535997	-0.300801	-0.39309	-0.283226	-0.374165	-0.377035	-0.0738143	0.21634	-0.387768
HUXP1180B11	MYO18A	myosin XVIIIA	NM_004740	399687	11	1	-0.163244	-0.538705	-0.219281	-0.354912	-0.169361	-0.0869356	-0.187352	0.1748	-0.413625	-0.405059	-0.46328	-0.602363	-0.276627	-0.467187	-0.516218	-0.442067	-0.651751	-0.636974	-0.293665	-0.305679	0.00513415	-0.128202	-0.4288
SHR020061026F03	ALAS2	aminolevulinate, delta-, synthase 2 (sideroblastic/hypochromic anemia)	NM_000032	212	12	1	-0.316608	-0.326053	-0.322732	-0.287224	-0.201822	-0.151338	-0.258533	-0.0955226	-0.0325128	-0.0701261	-0.35385	-0.248721	-0.180572	-0.266646	-0.351312	-0.41148	-0.303392	-0.37005	-0.17534	-0.393584	-0.404621	0.150622	-0.242276
HUXP1104G04	ALPL	alkaline phosphatase, liver/bone/kidney	NM_000478	249	12	1	-0.330824	-0.124755	-0.17897	-0.22556	-0.270452	NaN	-0.472488	NaN	NaN	NaN	-0.504473	NaN	0.134137	0.0524674	-0.422943	-0.465664	-0.419539	NaN	-0.235216	-0.245652	-0.538669	-0.189478	-0.10497
HUXP1020G09	ANXA4	annexin A4	NM_001153	307	12	1	-0.232245	-0.287304	-0.326265	-0.225648	-0.0684797	-0.186413	0.0284351	-0.238117	-0.204732	-0.182711	-0.236634	-0.269187	-0.358312	-0.308852	-0.312317	-0.697314	-0.360295	-0.462063	-0.416691	-0.333064	-0.346176	-0.372602	-0.475841
HUXP1090H05	BCAT1	branched chain aminotransferase 1, cytosolic	NM_005504	586	12	1	-0.117456	-0.313411	-0.141149	-0.216828	-0.295857	-0.205623	-0.206061	-0.0443799	-0.321641	-0.271531	-0.314767	-0.26713	-0.0787622	-0.263427	-0.300885	-0.298272	-0.381963	-0.274905	-0.43783	-0.343043	-0.622419	-0.21386	-0.424582
SHR020061019F08	BCKDHB	branched chain keto acid dehydrogenase E1, beta polypeptide (maple syrup urine disease)	NM_183050	594	12	1	-0.257388	0.0317865	-0.321928	-0.120752	-0.255042	-0.38529	-0.105467	-0.182203	-0.215013	-0.186701	-0.155278	-0.315202	-0.112964	-0.316945	-0.104023	-0.405992	-0.0796172	-0.400962	-0.538792	-0.417363	-0.584963	-0.209992	-0.387969
SHR020060020B07	CENPF	centromere protein F, 350/400ka (mitosin)	NM_016343	1063	12	1	0.0258207	-0.0132764	-0.00501807	-0.284977	-0.472068	-0.210064	-0.0291463	-0.269827	-0.266195	-0.251298	0.00564104	-0.815217	0.0708907	-0.0965015	-0.243582	-0.464491	-0.333216	-0.186205	-0.437824	-0.448783	-0.378345	-0.829084	-0.525767
HUXP1024D02	MAPK14	mitogen-activated protein kinase 14	NM_001315	1432	12	1	-0.0388774	-0.165634	-0.141122	-0.176995	-0.169326	-0.115993	-0.109466	-0.450853	-0.755508	-0.454499	-0.195612	-0.213931	-0.252351	-0.451203	-0.452094	-0.433584	-0.515813	-0.411598	-0.265919	-0.173265	-0.31829	-0.33531	-0.330017
HUXP1023H03	DCK	deoxycytidine kinase	NM_000788	1633	12	1	-0.18353	-0.122092	-0.121731	-0.298081	-0.102234	-0.246696	-0.159871	-0.447459	-0.373289	-0.345775	-0.152209	-0.181203	-0.369838	-0.367732	-0.119007	-0.481843	-0.130704	-0.432959	-0.27278	-0.263034	-0.338287	-0.432959	-0.203078
SHR020061014H12	DDT	D-dopachrome tautomerase	NM_001355	1652	12	1	0.137374	-0.135982	-0.198106	-0.211345	-0.150693	-0.0365044	-0.0507174	-0.291152	-0.272649	-0.334947	-0.211027	-0.315477	-0.290309	-0.155918	-0.0361769	-0.329258	-0.163559	-0.487653	-0.287604	-0.575502	-0.443472	-0.594008	0.00809595
HUXP1118D10	TIMM8A	translocase of inner mitochondrial membrane 8 homolog A (yeast)	NM_004085	1678	12	1	0.00302452	-0.109358	-0.227868	-0.205675	-0.207132	-0.215782	-0.263034	-0.478363	-0.244512	-0.115206	0.058764	-0.152003	-0.150497	-0.142979	-0.298747	-0.307299	-0.32609	-0.488401	-0.216371	-0.267338	-0.173993	-0.122436	-0.164369
HUXP1027C08	DNASE2	deoxyribonuclease II, lysosomal	NM_001375	1777	12	1	-0.243352	-0.449416	-0.316624	-0.311681	-0.254408	-0.268175	-0.240525	0.0381351	-0.460841	-0.421827	-0.478732	-0.382301	-0.0514903	-0.494369	-0.29931	-0.362006	-0.216656	-0.34861	-0.366688	-0.515541	-0.359542	-0.352106	-0.392802
HUXP1018C08	FOLR2	folate receptor 2 (fetal)	NM_000803	2350	12	1	-0.159448	-0.243252	-0.169476	-0.307696	-0.216439	-0.217567	-0.139798	0.019135	-0.436721	-0.391479	-0.365118	-0.373327	-0.102963	-0.155785	-0.478277	-0.477919	-0.260823	-0.422818	-0.480741	-0.472634	-0.533432	-0.289368	-0.525461
SHR020061012D08	GATA3	GATA binding protein 3	NM_002051	2625	12	1	-0.296393	-0.32681	-0.197232	NaN	-0.328422	-0.135352	-0.372554	-0.405992	NaN	-0.307429	-0.383329	NaN	-0.392317	-0.243669	-0.392317	-0.149056	-0.536053	-0.393914	-0.281771	-0.561427	-0.498251	-0.544321	NaN
HUXP1037A04	GCKR	glucokinase (hexokinase 4) regulator	NM_001486	2646	12	1	-0.268489	-0.0307623	-0.247928	-0.218772	-0.298762	-0.321928	-0.406625	NaN	-0.232661	NaN	-0.229482	-0.459432	-0.408085	-0.23816	-0.511253	-0.336283	-0.57289	NaN	-0.438442	-0.596935	NaN	-0.606179	-0.392317
HUXP1071D10	GSTM1	glutathione S-transferase M1	NM_146421	2944	12	1	-0.231816	-0.371256	-0.0460964	-0.441075	-0.20114	-0.250962	-0.36257	NaN	-0.248821	-0.381563	-0.0636586	-0.266393	-0.337358	-0.213779	-0.239951	-0.315687	-0.386183	NaN	-0.318271	-0.207325	-0.213707	-0.343484	-0.602996
SHR020060014B05	GZMH	granzyme H (cathepsin G-like 2, protein h-CCPX)	NM_033423	2999	12	1	NaN	-0.224494	-0.140863	-0.321928	-0.319068	NaN	-0.0343887	-0.157829	NaN	NaN	-0.271546	-0.217905	-0.495527	-0.359081	-0.321928	-0.503238	-0.52693	NaN	-0.496938	-0.271913	-0.321928	-0.411314	0
HUXP1122H03	KNG1	kininogen 1	NM_000893	3827	12	1	NaN	-0.290186	-0.410632	-0.402098	-0.369838	-0.422455	-0.205399	-0.254814	NaN	-0.331621	-0.364572	-0.17433	-0.210567	-0.223721	-0.371367	NaN	-0.510962	NaN	-0.385551	-0.169925	NaN	NaN	-0.399607
SHR020060007A11	MAP3K4	mitogen-activated protein kinase kinase kinase 4	NM_005922	4216	12	1	-0.132638	-0.200159	-0.20407	-0.2978	-0.195551	-0.391021	-0.0297473	-0.201634	-0.192645	-0.275007	-0.133453	-0.553154	-0.368106	-0.252766	-0.295776	-0.442005	-0.566347	NaN	-0.309069	-0.366782	-0.579892	-0.297452	-0.365825
HUXP1120F03	NDUFA3	NADH dehydrogenase (ubiquinone) 1 alpha subcomplex, 3, 9kDa	NM_004542	4696	12	1	-0.112991	-0.188009	-0.311335	-0.0834307	-0.238413	-0.210567	-0.278187	-0.198533	-0.240647	-0.271868	-0.284768	-0.353691	-0.285685	-0.365445	-0.36787	-0.430696	-0.437945	-0.31876	-0.262212	-0.33985	-0.370883	-0.254083	-0.259527
HUXP1057H09	OPA1	optic atrophy 1 (autosomal dominant)	NM_130833	4976	12	1	0.0295948	-0.322893	-0.211763	-0.219781	-0.464132	-0.150104	-0.0641303	-0.319326	-0.477159	NaN	-0.183446	-0.796467	-0.293946	-0.315305	-0.50166	-0.387023	-0.498027	NaN	-0.521953	-0.462106	-0.345644	-0.201634	-0.401516
SHR020061025A10	ORC4L	origin recognition complex, subunit 4-like (yeast)	NM_181742	5000	12	1	-0.109934	-0.115116	-0.151631	-0.182114	-0.0833557	-0.311944	-0.172963	-0.667064	-0.402437	-0.395724	-0.10188	-0.238512	-0.36257	-0.166803	-0.171271	-0.627423	-0.42303	-0.754244	-0.510392	-0.477668	-0.415037	-0.479993	-0.407175
HUXP1057H05	PMCH	pro-melanin-concentrating hormone	NM_002674	5367	12	1	-0.248535	-0.307989	-0.0946369	-0.154142	-0.23744	-0.10758	-0.364818	-0.24716	-0.567685	-0.158337	-0.0266117	0.00707205	-0.168443	-0.154034	-0.406625	-0.399867	-0.525256	-0.564129	-0.500265	-0.518764	-0.658863	-0.486529	-0.323773
HUXP1125C02	PRKDC	protein kinase, DNA-activated, catalytic polypeptide	NM_006904	5591	12	1	-0.213391	-0.249075	-0.321458	-0.123336	-0.476869	-0.299652	-0.344275	-0.393553	-0.471324	-0.315679	-0.0508014	-0.392054	0.0400128	-0.372451	-0.273834	-0.388201	-0.281886	-0.157768	-0.255613	-0.220891	-0.325406	-0.322217	-0.164193
SHR020060016D10	PSG1	pregnancy specific beta-1-glycoprotein 1	M22312	5669	12	1	-0.201634	-0.215013	-0.163499	-0.244734	-0.242201	NaN	-0.11477	NaN	-0.115477	-0.419539	-0.111421	-0.137504	-0.131706	-0.43105	-0.185746	-0.458106	-0.247928	NaN	-0.500898	-0.36257	-0.164119	-0.242201	-0.436864
HUXP1024C12	RCN2	reticulocalbin 2, EF-hand calcium binding domain	NM_002902	5955	12	1	-0.1933	-0.140709	-0.0522223	-0.23693	-0.186535	-0.117562	-0.219637	-0.123069	-0.185579	-0.268413	-0.239827	-0.21693	-0.325295	-0.374396	-0.299339	-0.496314	-0.415611	-0.509646	-0.585207	-0.247595	-0.551947	-0.347218	-0.382633
HUXP1102A07	RPS6KA3	ribosomal protein S6 kinase, 90kDa, polypeptide 3	NM_004586	6197	12	1	-0.145605	-0.0635651	-0.277985	-0.00836347	-0.165338	-0.379848	-0.485427	-0.235103	-0.11984	NaN	-0.304855	-0.472488	-0.354431	-0.373731	-0.329308	-0.415037	-0.334001	-0.364572	-0.298156	-0.375145	-0.298224	-0.374745	-0.295007
HUXP1006C10	SC5DL	sterol-C5-desaturase (ERG3 delta-5-desaturase homolog, fungal)-like	NM_006918	6309	12	1	-0.545968	-0.222793	-0.091423	-0.309169	-0.302847	-0.177643	-0.263034	-0.563901	NaN	NaN	-0.13245	-0.235813	-0.168067	-0.307573	-0.282035	-0.353051	-0.16601	NaN	-0.72738	-0.48134	-0.61471	-0.27711	-0.222392
HUXP1176F04	SFRS1	splicing factor, arginine/serine-rich 1 (splicing factor 2, alternate splicing factor)	CR611166	6426	12	1	-0.178501	-0.112142	-0.186304	-0.217591	-0.313499	-0.560715	-0.200631	-0.539366	-0.367057	-0.215338	0.147398	-0.273376	-0.344648	0.0197295	-0.0053138	-0.313158	-0.790077	-0.321928	-0.510615	-0.100111	-0.169925	-0.0426062	0.0135465
HUXP1089A01	SNAI1	snail homolog 1 (Drosophila)	NM_005985	6615	12	1	-0.378512	-0.565334	0.358192	NaN	-0.284208	-0.244307	-0.204014	-0.589535	-0.232661	-0.292181	-0.169925	-0.31719	-0.524662	-0.403356	-0.479993	-0.851298	-0.544321	NaN	-0.78136	-0.453826	-0.555519	0	-0.35311
SHR020061001A04	SSB	Sjogren syndrome antigen B (autoantigen La)	NM_003142	6741	12	1	-0.205928	-0.181689	-0.136727	-0.274159	-0.453149	-0.181228	-0.215879	-0.249854	0.0592065	-0.154146	0.226866	-0.415271	-0.360983	-0.278002	-0.449828	-0.771088	-0.328107	-0.158743	-0.645837	-0.422732	-0.384649	-0.331037	-0.182278
HUXP1053E09	TCOF1	Treacher Collins-Franceschetti syndrome 1	NM_001008656	6949	12	1	-0.184104	-0.00661788	-0.0357342	-0.0942931	NaN	-0.214505	-0.242438	0.0874628	-0.321928	-0.417235	-0.232397	-0.0776526	-0.14741	-0.24972	-0.32577	-0.445052	-0.424885	-0.547488	-0.454923	-0.354777	-0.286051	-0.143453	-0.354109
HUXP1122D02	TERF1	telomeric repeat binding factor (NIMA-interacting) 1	NM_017489	7013	12	1	-0.175087	-0.138197	-0.183554	-0.407504	-0.308549	-0.0874628	-0.329308	-0.400538	-0.415037	-0.300509	-0.212729	-0.573991	-0.388565	-0.306103	-0.278156	-0.258193	-0.331621	-0.430634	-0.340229	-0.104108	-0.280901	-0.294061	-0.241008
HUXP1078C11	TGFBI	transforming growth factor, beta-induced, 68kDa	NM_000358	7045	12	1	-0.183812	-0.195406	-0.227308	-0.271805	-0.25385	-0.218122	-0.125236	-0.13043	-0.174029	-0.027539	-0.174574	-0.308686	-0.307761	-0.337501	-0.497212	-0.276424	-0.318582	-0.934412	-0.404621	-0.50024	-0.374275	-0.316214	-0.364243
SHR020060016D09	TGM1	transglutaminase 1 (K polypeptide epidermal type I, protein-glutamine-gamma-glutamyltransferase)	NM_000359	7051	12	1	-0.207691	-0.2074	NaN	-0.131644	-0.232885	-0.178706	-0.0458037	-0.146841	-0.321928	-0.277985	0.0210616	-0.289507	-0.116881	-0.219075	-0.555698	-0.359972	-0.400087	-0.509472	-0.278792	-0.385654	-0.541795	-0.442518	-0.413043
HUXP1162H08	TMEM1	transmembrane protein 1	NM_003274	7109	12	1	-0.321928	-0.314873	-0.475085	-0.238611	NaN	-0.062061	-0.336283	-0.350497	-0.185867	NaN	-0.258533	-0.608809	-0.494765	-0.280108	NaN	-0.68001	NaN	NaN	-0.293731	-0.350497	-0.39689	-0.459432	-0.340075
HUXP1086H02	TNXB	tenascin XB	NM_019105	7148	12	1	-0.203533	-0.241501	-0.221079	-0.341037	-0.247012	-0.191481	-0.241008	-0.0692627	-0.496567	-0.162939	-0.386279	-0.356565	0.204141	0	-0.267696	-0.223896	-0.441705	-0.669176	-0.431235	-0.557995	-0.378512	-0.353179	-0.426265
HUXP1120F04	YEATS4	YEATS domain containing 4	NM_006530	8089	12	1	-0.245235	-0.270398	-0.24543	-0.285964	-0.0867764	-0.144948	-0.0258554	-0.189116	0.0150753	-0.304006	-0.215609	-0.165506	-0.334001	-0.393536	-0.323363	-0.54404	-0.334001	-0.408885	-0.55284	-0.430634	-0.479655	-0.420751	-0.322243
SHR020061025C10	MMP23B	matrix metallopeptidase 23B	NM_006983	8510	12	1	0.0951572	0.0562682	-0.183307	NaN	-0.251539	-0.15899	-0.123483	-0.630975	NaN	-0.249614	0.084006	-0.653349	-0.212097	-0.0675332	-0.222392	-0.231626	-0.409255	NaN	-0.317292	-0.393095	-0.105493	-0.479168	0.182864
HUXP1121H02	RDH16	retinol dehydrogenase 16 (all-trans)	NM_003708	8608	12	1	NaN	-0.274757	-0.364411	-0.406214	-0.200299	NaN	-0.204358	NaN	-0.263034	-0.201634	-0.110644	-0.110424	-0.317341	-0.201634	NaN	-0.39079	-0.297681	NaN	-0.562314	-0.549339	-0.164387	-0.296617	-0.254317
SHR020061007A09	CCNK	cyclin K	NM_003858	8812	12	1	0.128065	-0.363963	-0.389175	-0.442222	-0.0192791	-0.0473057	-0.0946369	0.124179	0.0232698	-0.0681715	0	-0.265345	-0.0198996	-0.0299532	-0.520603	0.0560661	-0.712342	NaN	-0.819214	-0.521637	NaN	0.0264722	-0.519671
SHR020061035C08	RNF8	ring finger protein 8	NM_003958	9025	12	1	-0.268489	-0.415037	-0.202599	NaN	-0.285754	-0.128986	-0.11832	-0.666757	-0.232661	-0.146841	-0.100164	-0.565199	-0.554589	-0.209693	-0.163825	-0.341037	-0.485427	NaN	-0.503111	-0.382525	-0.518348	-0.292782	-0.447005
HUXP1116F11	USP8	ubiquitin specific peptidase 8	NM_005154	9101	12	1	-0.241621	-0.286881	-0.493464	-0.293476	-0.392317	-0.418604	-0.350647	-0.325166	-0.404842	-0.412054	0.0112711	-0.404576	-0.0325679	-0.0462937	-0.261741	-0.383329	-0.253757	-0.486987	-0.324589	-0.449611	-0.36311	-0.209847	-0.255115
HUXP1046A02	PPIG	peptidylprolyl isomerase G (cyclophilin G)	NM_004792	9360	12	1	-0.113243	-0.22158	-0.0970413	-0.4975	-0.502185	-0.199368	-0.132388	0.126995	-0.101225	-0.14901	0.158196	-0.661979	-0.444609	-0.0631686	-0.387058	-0.714426	-0.412011	-0.405206	-0.405667	-0.384936	-0.278545	-0.270236	-0.299155
SHR020060005C08	RAB9	RAB9, member RAS oncogene family	NM_004251	9367	12	1	-0.0478285	-0.23827	-0.0147215	-0.0673993	-0.0443941	-0.303392	-0.106915	-0.705817	-0.186012	-0.274175	-0.321928	0.0743183	-0.373043	-0.425306	-0.185867	-0.57836	-0.244622	-0.350757	-0.537373	-0.259644	-0.448146	-0.367732	-0.305388
HUXP1015E04	MINPP1	multiple inositol polyphosphate histidine phosphatase, 1	NM_004897	9562	12	1	-0.110914	-0.194638	-0.0752478	-0.30227	-0.193614	-0.0889736	-0.129155	-0.0789596	-0.312053	-0.269148	-0.281536	-0.32905	-0.328312	-0.32267	-0.355274	-0.501558	-0.371894	-0.48641	-0.49244	-0.423559	-0.408769	-0.111305	-0.295122
SHR020061007B12	EIF5B	eukaryotic translation initiation factor 5B	NM_015904	9669	12	1	-0.115277	-0.160741	-0.0101349	-0.423211	-0.407566	-0.267715	-0.203296	0.0297797	-0.0565096	-0.0833446	0.244032	-0.49304	-0.253483	-0.285263	-0.515284	-0.678482	-0.634187	-0.644646	-0.476518	-0.300841	-0.195458	-0.118094	-0.278343
SHR020061032G03	RNF40	ring finger protein 40	Hs.65238	9810	12	1	-0.162271	-0.151118	-0.117836	-0.0324215	-0.311586	-0.307429	-0.0850815	-0.402547	-0.307429	-0.618571	-0.316474	NaN	-0.264456	-0.275365	-0.647119	-0.554102	-0.310788	-0.446256	-0.490445	-0.658566	-0.434937	-0.411195	-0.559872
HUXP1120E09	SLC25A15	solute carrier family 25 (mitochondrial carrier; ornithine transporter) member 15	NM_014252	10166	12	1	-0.227893	-0.176323	-0.253033	-0.281232	-0.0992096	-0.460634	-0.236733	-0.542527	-0.302029	-0.441269	-0.250137	-0.151546	-0.263476	-0.467904	-0.797013	-0.902844	-0.703144	-0.547488	-0.589067	-0.244772	-0.248456	-0.069348	-0.237141
SHR020060019D02	MPHOSPH9	M-phase phosphoprotein 9	X98258	10198	12	1	-0.153951	-0.165878	-0.411343	-0.386468	-0.31895	-0.153623	-0.0415665	-0.0978473	-0.207513	-0.341307	-0.190331	-0.528694	-0.531252	-0.374989	-0.358379	-0.330064	-0.570832	-0.449971	-0.41684	-0.254421	-0.57656	-0.420152	-0.282934
SHR020060013D06	SDCCAG10	serologically defined colon cancer antigen 10	NM_005869	10283	12	1	-0.227338	-0.32327	-0.240066	NaN	-0.540385	-0.244734	-0.344167	-0.364572	-0.285117	-0.315967	-0.0822941	0.100305	-0.323295	-0.226606	-0.239007	-0.587505	-0.351472	-0.381563	-0.560159	-0.331599	-0.34001	-0.239277	-0.360882
HUXP1162C12	39147	membrane-associated ring finger (C3HC4) 6	NM_005885	10299	12	1	-0.103093	-0.15164	-0.186413	-0.241631	-0.129739	-0.247336	-0.17092	-0.0101718	-0.37404	-0.275463	-0.0931094	-0.398279	-0.14162	-0.151278	-0.260123	-0.256138	-0.504589	-0.245411	-0.468149	-0.494765	-0.356535	-0.14464	-0.30998
HUXP1004H05	WFDC2	WAP four-disulfide core domain 2	NM_006103	10406	12	1	-0.205374	-0.168067	-0.0527415	-0.122336	-0.208207	-0.267933	-0.200299	-0.20469	-0.314315	-0.108422	-0.149143	-0.107756	-0.272526	-0.410632	-0.304855	-0.494508	-0.366782	-0.40018	-0.600904	-0.299225	-0.433167	-0.174605	-0.265811
HUXP1119G09	C1D	nuclear DNA-binding protein	NM_173177	10438	12	1	-0.303751	-0.321253	-0.288223	-0.265195	-0.323155	-0.148048	-0.266263	-0.177413	-0.179056	-0.02301	0.00955431	-0.171887	-0.381345	-0.474229	-0.435386	-0.539366	-0.560809	-0.492598	-0.550967	-0.390432	-0.419137	-0.189636	-0.203123
HUXP1018G12	PROCR	protein C receptor, endothelial (EPCR)	NM_006404	10544	12	1	-0.204358	-0.180035	-0.0180339	-0.560715	-0.144995	-0.123735	0.0655883	-0.404696	NaN	-0.290677	-0.167457	-0.269461	-0.0927104	-0.157101	-0.220599	-0.238449	-0.428843	-0.498251	-0.791413	-0.773724	-0.396422	-0.514573	-0.522902
SHR020060017F05	OLFM4	olfactomedin 4	NM_006418	10562	12	1	-0.430385	-0.236067	-0.103378	-0.538934	-0.375509	-0.420004	-0.307573	-0.754888	-0.212661	-0.260123	0.0592392	-0.0804187	-0.0948097	-0.201165	-0.214029	-0.581954	-0.431266	-0.210114	-0.443069	-0.159478	-0.430634	-0.269116	-0.329921
HUXP1018E10	INMT	indolethylamine N-methyltransferase	NM_006774	11185	12	1	0.0209596	-0.27343	-0.289045	-0.14077	-0.228672	-0.22741	-0.0210003	-0.339597	0.0130562	-0.307429	-0.169925	0.14543	-0.0673099	0.00525573	-0.39536	-0.303781	-0.304855	NaN	-0.489966	NaN	-0.643515	-0.255257	-0.542149
SHR020060013A06	POLG2	polymerase (DNA directed), gamma 2, accessory subunit	NM_007215	11232	12	1	-0.153545	0.0550141	0.143735	NaN	-0.53307	-0.285023	-0.324557	-0.639118	-0.153805	-0.486447	-0.229386	-0.18595	-0.405794	-0.314293	-0.176549	-0.481062	-0.442943	0.121015	-0.36257	-0.199938	-0.523068	-0.185692	-0.339242
HUXP1105F10	DKFZP686A01247	hypothetical protein	Hs.335163	22998	12	1	-0.265239	-0.118836	-0.355875	-0.451379	-0.0441676	-0.24591	-0.245979	-0.57289	-0.499233	NaN	-0.141092	-0.419539	-0.298224	-0.470027	-0.277985	-0.431157	-0.367371	-0.307429	-0.398549	-0.438442	-0.477702	-0.485427	-0.607158
HUXP1073E06	MYCBP2	MYC binding protein 2	NM_015057	23077	12	1	-0.0869566	-0.169468	-0.129156	-0.0979937	-0.158262	-0.0939179	-0.103252	-0.185049	-0.191173	-0.298784	-0.155807	-0.266687	-0.34656	-0.191003	-0.353581	-0.60812	-0.394159	-0.452985	-0.42415	-0.40687	-0.599864	-0.431456	-0.38662
HUXP1048C02	SMC5	structural maintenance of chromosomes 5	Hs.534189	23137	12	1	-0.0816838	-0.165533	-0.0324215	-0.368968	-0.336525	-0.292451	-0.143966	-0.168506	-0.0806185	-0.146841	-0.14439	-0.575312	-0.249556	-0.332805	-0.232661	-0.42414	-0.16601	NaN	-0.241008	-0.342602	-0.491612	-0.594947	-0.629817
HUXP1119G07	M-RIP	myosin phosphatase-Rho interacting protein	Hs.462341	23164	12	1	0.0331669	-0.131245	0.0173821	0.192645	-0.121015	NaN	-0.173332	-0.537028	-0.357552	-0.339692	-0.590745	-0.580193	-0.0828569	-0.0714351	-0.263034	-0.543443	-0.427421	-0.381871	-0.479808	-0.485427	NaN	-0.138828	-0.272731
HUXP1213B01	EHBP1	EH domain binding protein 1	NM_015252	23301	12	1	-0.1686	-0.154818	-0.221537	-0.273648	-0.155455	-0.177538	-0.199456	-0.522841	NaN	-0.215729	-0.206451	-0.131245	-0.320041	-0.293731	-0.303392	-0.448406	NaN	-0.232661	-0.441632	-0.388402	-0.146841	-0.114966	-0.104451
HUXP1008D03	SATB2	SATB family member 2	NM_015265	23314	12	1	-0.14743	-0.235554	-0.147508	-0.372092	-0.426265	-0.278178	-0.316581	-0.216449	-0.14016	-0.139652	-0.0101171	-0.136288	-0.276876	-0.261986	-0.501207	-0.737246	-0.579389	-0.588878	-0.539879	-0.356721	-0.478556	-0.510776	-0.170565
HUXP1089C12	LSM5	LSM5 homolog, U6 small nuclear RNA associated (S. cerevisiae)	Hs.424908	23658	12	1	-0.118566	-0.138439	0.032381	-0.428118	-0.254598	-0.11335	-0.123352	-0.16601	-0.30589	-0.219046	-0.129459	-0.617854	-0.0380063	-0.106698	-0.13734	-0.401877	-0.139299	-0.48663	-0.307944	-0.356997	-0.203955	-0.0490327	-0.231263
HUXP1004H11	RNF19	ring finger protein 19	NM_015435	25897	12	1	-0.408085	-0.0777223	-0.177459	-0.162136	-0.2205	NaN	-0.154171	-0.4397	-0.364572	0.374396	-0.178803	-0.319177	-0.303069	-0.125531	NaN	-0.263034	-0.10218	NaN	-0.336283	-0.462972	-0.593786	0.140863	-0.420218
HUXP1074E03	SIPA1L1	signal-induced proliferation-associated 1 like 1	NM_015556	26037	12	1	-0.226068	0.0331669	-0.259387	0.0407856	-0.040452	-0.188204	-0.027745	-0.263034	-0.359081	-0.487938	0.0634254	-0.369234	-0.0728506	-0.241008	-0.361266	-0.115477	-0.273923	-0.336283	-0.285909	-0.378512	-0.372554	-0.438442	-0.595379
HUXP1064A09	WIPI2	WD repeat domain, phosphoinositide interacting 2	NM_016003	26100	12	1	0.0339473	-0.327102	-0.482152	0.0299015	-0.267104	-0.176427	0.0603726	-0.440573	NaN	NaN	0.0085115	-0.608809	-0.117266	0.168929	-0.289507	0.0215332	-0.30189	NaN	-0.485427	NaN	-0.332575	NaN	-0.584963
SHR020061013G10	STRN3	striatin, calmodulin binding protein 3	NM_014574	29966	12	1	-0.0422282	-0.223813	-0.321928	-0.321928	-0.305708	-0.198904	-0.244622	-0.504675	-0.333424	-0.125531	-0.239754	-0.295077	0.0071776	-0.0874628	-0.0306968	-0.206107	-0.334419	-0.446256	-0.292418	-0.49206	-0.316122	-0.272526	-0.277534
HUXP1206D09	YARS2	tyrosyl-tRNA synthetase 2 (mitochondrial)	NM_015936	51067	12	1	-0.163162	-0.121316	-0.0755261	-0.249161	-0.197246	-0.182906	-0.0981804	-0.143725	-0.226746	-0.153458	0.013251	-0.207513	-0.1758	-0.145562	-0.249177	-0.326027	-0.293365	-0.337767	-0.369554	-0.371216	-0.50228	-0.148731	-0.398638
HUXP1204F10	CEECAM1	cerebral endothelial cell adhesion molecule 1	NM_016174	51148	12	1	0.15338	-0.024835	0.0618393	-0.0826251	-0.255965	-0.102098	-0.0559564	-0.149963	-0.345927	-0.259968	-0.37749	-0.5807	-0.10561	-0.0791922	-0.444249	-0.35178	-0.316369	-0.472488	-0.509861	-0.392062	-0.188345	-0.0641303	-0.393342
HUXP1005B04	CRBN	cereblon	NM_016302	51185	12	1	-0.348728	-0.255601	-0.304479	-0.147754	-0.247928	-0.265894	-0.321928	-0.574236	-0.334984	-0.177396	-0.0151069	-0.351844	-0.103505	-0.102877	-0.208587	-0.386468	-0.123382	-0.222392	-0.33828	-0.421827	-0.222392	-0.017278	-0.366539
HUXP1030G11	RSRC1	arginine/serine-rich coiled-coil 1	NM_016625	51319	12	1	-0.122683	-0.40864	-0.321176	-0.293696	-0.266128	-0.247773	-0.33098	-0.112953	-0.251962	-0.142872	0.1418	-0.299354	-0.418621	-0.401523	-0.414066	-0.234047	-0.381709	-0.319639	-0.237827	-0.325125	-0.353442	-0.332309	-0.148767
HUXP1167B12	PPME1	protein phosphatase methylesterase 1	NM_016147	51400	12	1	-0.00510087	-0.132624	0.0404864	-0.264897	-0.00371032	0.030894	-0.0309756	-0.208163	-0.255807	-0.21623	-0.170449	-0.175783	-0.284287	-0.246711	-0.261103	-0.281103	-0.476522	-0.406854	-0.539639	-0.510913	-0.37244	-0.14464	-0.628031
HUXP1211C02	TMBIM4	transmembrane BAX inhibitor motif containing 4	AL117550	51643	12	1	-0.485427	-0.332196	-0.254183	-0.559809	-0.165424	-0.482942	-0.402098	-0.304855	-0.161589	-0.0783879	-0.314109	-0.187279	-0.267104	-0.465343	-0.522421	-0.6734	-0.579668	-0.40576	-0.33383	-0.375291	-0.282143	-0.284009	-0.240263
HUXP1091A06	RSF1	remodeling and spacing factor 1	NM_016578	51773	12	1	-0.111452	-0.197397	-0.169288	-0.348465	-0.380272	-0.338585	-0.241904	-0.0534393	-0.229617	-0.0998986	0.0638465	-0.484934	-0.220375	-0.332345	-0.156535	-0.252939	-0.225619	-0.166358	-0.440412	-0.416393	-0.53618	-0.0991934	-0.519981
HUXP1066D05	EXOC6	exocyst complex component 6	NM_019053	54536	12	1	-0.28744	-0.213192	-0.257601	-0.190431	-0.364156	-0.255042	-0.175087	-0.312138	-0.467505	-0.215013	-0.241008	-0.256973	-0.393597	-0.370472	-0.431716	-0.420843	-0.608809	-0.451874	-0.415037	-0.536053	-0.214019	-0.263034	-0.273285
HUXP1187A09	ZNF770	zinc finger protein 770	NM_014106	54989	12	1	-0.0129973	-0.550049	-0.819197	-0.424498	-0.221356	-0.348895	-0.498454	-0.448985	NaN	-0.301002	-0.188662	-0.431339	0.0390528	0.226965	-0.509601	-0.168682	-0.731804	-0.687117	-0.647247	-0.566525	-0.284208	-0.165249	-0.120681
HUXP1073C01	PRPF39	PRP39 pre-mRNA processing factor 39 homolog (S. cerevisiae)	NM_017922	55015	12	1	-0.0917426	-0.286304	-0.662965	-0.464841	-0.206451	-0.168877	-0.301656	-0.624855	-0.434937	0.0540398	0.0142842	-0.377805	-0.329817	-0.0763509	-0.510399	-0.561533	-0.544918	-0.617095	-0.31999	-0.518764	-0.386279	-0.338525	-0.116814
HUXP1079A05	PRPF38B	PRP38 pre-mRNA processing factor 38 (yeast) domain containing B	NM_018061	55119	12	1	-0.12679	-0.192244	-0.2695	-0.262951	-0.228269	-0.100249	-0.250061	-0.153283	-0.40613	-0.0800899	0.190048	-0.303818	-0.436668	-0.409227	-0.338565	-0.444646	-0.456675	-0.483775	-0.376484	-0.360659	-0.442042	-0.573522	-0.188165
HUXP1021F08	MULK	multiple substrate lipid kinase	Hs.521240	55750	12	1	0	-0.455784	-0.334664	-0.381634	-0.286881	-0.337035	-0.246264	-0.263034	-0.267696	-0.412782	-0.432959	-0.24912	-0.283109	-0.244419	-0.374848	-0.308517	-0.501749	-0.380424	-0.563901	-0.371969	-0.415037	-0.158002	-0.261162
HUXP1023C09	C1GALT1	core 1 synthase, glycoprotein-N-acetylgalactosamine 3-beta-galactosyltransferase, 1	NM_020156	56913	12	1	-0.0943274	-0.166897	-0.208753	-0.562191	-0.160465	-0.209009	-0.19189	-0.263034	-0.268615	-0.334225	-0.153521	-0.161589	-0.23078	-0.193132	-0.401762	-0.429012	-0.341037	NaN	-0.520739	-0.0986476	-0.357848	-0.297968	-0.264132
SHR020061028A12	MRS2L	MRS2-like, magnesium homeostasis factor (S. cerevisiae)	NM_020662	57380	12	1	-0.310523	-0.109688	-0.117161	-0.0837513	-0.202493	-0.2935	-0.169597	-0.440916	-0.00921853	-0.0842689	0.141728	-0.0860025	-0.3289	-0.226148	-0.243587	-0.506523	-0.65501	-0.451479	-0.425801	-0.353957	-0.334241	-0.199444	-0.323676
HUXP1205B06	ARID1B	AT rich interactive domain 1B (SWI1-like)	NM_017519	57492	12	1	-0.217701	-0.13803	0.0240637	-0.455082	-0.0948592	-0.130483	-0.0930059	-0.206072	-0.0509839	-0.198546	-0.171577	-0.261628	-0.308426	-0.181536	-0.286439	-0.487977	-0.316304	-0.584963	-0.229482	-0.363903	-0.272578	-0.305679	-0.537111
HUXP1132F02	RBM25	RNA binding motif protein 25	NM_021239	58517	12	1	-0.165398	0.148863	-0.250117	-0.497884	-0.511919	-0.391659	-0.246865	-0.307222	-0.299919	0.0302344	0.322684	-0.414371	-0.466876	-0.126657	-0.262134	-0.500736	-0.404263	-0.368867	-0.264403	-0.350668	-0.343338	-0.426488	-0.258079
HUXP1066G04	C2orf43	chromosome 2 open reading frame 43	NM_021925	60526	12	1	-0.268489	-0.0256866	-0.103093	-0.256833	0.0238467	-0.313158	-0.148863	-0.859137	-0.266646	-0.270358	-0.219313	-0.189034	-0.432315	-0.429988	-0.444641	-0.686583	-0.631913	-0.393914	-0.559672	-0.449611	-0.437405	-0.147899	-0.442388
HUXP1066E11	GNPNAT1	glucosamine-phosphate N-acetyltransferase 1	NM_198066	64841	12	1	-0.309328	0.0413839	-0.308753	-0.235216	-0.485427	-0.245476	-0.0774045	-0.308549	NaN	NaN	0	-0.267696	-0.208779	-0.247521	-0.59368	-0.448758	-0.405992	NaN	-0.687578	NaN	-0.650058	-0.202308	-0.511381
HUXP1164C03	CASD1	CAS1 domain containing 1	NM_022900	64921	12	1	-0.213779	-0.130638	-0.14824	-0.28034	-0.227828	-0.249556	-0.258285	NaN	-0.208635	-0.227937	-0.226313	-0.262703	-0.324085	-0.416625	-0.224473	-0.305366	-0.336831	-0.223506	-0.447827	-0.450084	-0.407472	0.0741233	-0.727776
HUXP1112B08	PHACTR4	phosphatase and actin regulator 4	NM_023923	65979	12	1	-0.180572	-0.286051	-0.483517	-0.213244	-0.0482956	-0.36257	-0.204199	-0.584963	-0.402098	-0.117039	-0.216423	-0.544321	-0.271447	-0.144658	-0.390459	-0.549629	-0.381871	-0.593375	-0.524311	-0.279654	-0.0536879	-0.246837	-0.457798
HUXP1088H11	MIS12	MIS12, MIND kinetochore complex component, homolog (yeast)	NM_024039	79003	12	1	-0.0538995	-0.351625	-0.140951	-0.370235	-0.181123	-0.196892	-0.0485741	-0.0296371	-0.153849	-0.34861	-0.277876	-0.511453	-0.30519	-0.149182	0.191177	-0.193021	-0.233601	-0.267605	-0.363098	-0.659433	-0.25668	0.041307	-0.603388
HUXP1018A09	CDC73	cell division cycle 73, Paf1/RNA polymerase II complex component, homolog (S. cerevisiae)	NM_024529	79577	12	1	-0.349409	-0.331844	-0.189478	-0.351472	-0.351031	-0.330308	-0.239625	-0.675998	-0.504923	-0.423971	-0.271302	-0.3106	-0.0915672	-0.234883	-0.42553	-0.396833	-0.505235	-0.432315	-0.479564	-0.943416	-0.493332	-0.395929	-0.745995
HUXP1116A07	ZYG11B	zyg-11 homolog B (C. elegans)	NM_024646	79699	12	1	-0.156906	-0.134301	-0.272175	-0.0676698	-0.0701753	-0.207595	-0.238611	-0.289507	-0.256856	-0.0509239	-0.0466262	-0.322977	-0.285602	-0.468976	-0.456638	-0.413789	-0.498179	-0.364572	-0.279284	-0.295104	-0.55687	-0.246311	-0.334001
HUXP1170A04	VCPIP1	valosin containing protein (p97)/p47 complex interacting protein 1	NM_025054	80124	12	1	-0.222392	-0.414283	0.0631938	-0.399407	-0.373678	0.0187366	-0.263034	-0.67319	NaN	NaN	-0.0831412	NaN	-0.459432	-0.345135	-0.153805	-0.332076	NaN	NaN	-0.243003	-0.532668	-0.34861	NaN	-0.357362
HUXP1064G06	DBF4B	DBF4 homolog B (S. cerevisiae)	NM_025104	80174	12	1	-0.121306	-0.220048	-0.284861	-0.355541	-0.441252	-0.302888	-0.0540554	-0.148968	-0.149289	-0.193406	-0.170234	-0.239512	-0.262785	-0.0128448	-0.212197	-0.324219	-0.179522	-0.377004	-0.418676	-0.251412	-0.589395	-0.26748	-0.437267
HUXP1080H08	KIAA1840	KIAA1840	NM_025137	80208	12	1	-0.459432	-0.15078	-0.205861	-0.178457	-0.350099	-0.404066	-0.348664	-0.420706	-0.119961	-0.180572	-0.117963	-0.308753	-0.0439115	-0.204014	-0.331621	-0.361888	-0.355829	-0.463947	-0.217591	-0.233797	-0.322856	-0.254101	-0.132755
HUXP1037A03	C15orf44	chromosome 15 open reading frame 44	NM_030800	81556	12	1	NaN	-0.415037	-0.0623965	-0.183446	-0.418501	NaN	0.201634	-0.321928	-0.0931094	-0.232661	-0.400879	-0.472488	-0.172181	0.255042	-0.0909737	-0.31104	-0.250962	NaN	-0.878985	-0.618129	NaN	0.101538	-0.152003
HUXP1071H05	PUS7L	pseudouridylate synthase 7 homolog (S. cerevisiae)-like	NM_031292	83448	12	1	-0.195487	-0.117732	-0.250721	-0.269497	-0.368116	-0.216181	-0.368699	-0.396706	-0.380031	-0.0438876	0.250172	-0.538019	-0.577086	-0.366128	-0.472371	-0.685444	-0.492084	-0.47592	-0.599684	-0.524159	-0.328546	-0.476651	-0.24851
HUXP1111D05	ZCCHC7	zinc finger, CCHC domain containing 7	NM_032226	84186	12	1	-0.374578	-0.237395	-0.491388	-0.350578	-0.285708	-0.251539	-0.170415	-0.50696	-0.498251	-0.252308	-0.0398403	-0.338983	-0.280306	-0.0200842	-0.126218	-0.187035	-0.320089	-0.656268	-0.429113	-0.379589	-0.291604	-0.358631	-0.33568
HUXP1196D08	SYTL1	synaptotagmin-like 1	NM_032872	84958	12	1	-0.0797272	-0.322471	-0.252187	-0.269187	-0.246794	-0.242494	-0.204515	-0.478261	-0.357552	-0.27024	-0.23502	-0.226915	-0.250353	-0.102436	-0.103311	-0.215922	-0.286994	-0.467505	-0.17288	-0.288314	-0.251323	-0.347019	-0.300973
HUXP1079G12	KIAA1737	KIAA1737	NM_033426	85457	12	1	-0.272203	-0.057551	-0.206451	-0.238702	0.268489	-0.239466	-0.525628	-0.778585	-0.332355	-0.247093	-0.179484	-0.351005	-0.483487	-0.432363	-0.483602	-0.625152	-0.459432	-0.324622	-0.179909	-0.150515	-0.566669	-0.421138	-0.212994
HUXP1205G04	NAV2	neuron navigator 2	NM_145117	89797	12	1	-0.141728	-0.327782	-0.192645	-0.409088	-0.0208147	-0.193228	-0.0843051	-0.213643	-0.356431	-0.358166	-0.392317	-0.335847	-0.159478	0.0989503	-0.397373	-0.324573	-0.134865	-0.490326	-0.203567	-0.143565	-0.412072	0.236834	-0.219105
HUXP1058A07	C5orf30	chromosome 5 open reading frame 30	NM_033211	90355	12	1	-0.0987782	-0.176878	-0.344216	-0.276604	-0.16273	0.0170735	0.00998409	-0.610053	-0.197681	-0.235103	-0.371969	-0.240134	-0.469485	-0.353637	-0.436952	-0.449803	-0.378512	-0.523562	-0.381354	-0.366322	-0.517607	-0.512335	-0.428843
HUXP1161D01	ZNF598	zinc finger protein 598	NM_178167	90850	12	1	-0.259087	-0.421957	-0.24952	0.0264722	-0.321928	-0.372659	0.0280144	-0.249978	-0.15899	NaN	-0.33361	NaN	-0.324129	-0.147845	-0.485427	-0.195396	-0.405992	NaN	-0.220126	NaN	-0.478047	NaN	-0.0489096
HUXP1047H04	LONRF1	LON peptidase N-terminal domain and ring finger 1	NM_152271	91694	12	1	-0.0926112	0.00993824	-0.132755	-0.225645	-0.271175	-0.39486	-0.384071	-0.372302	-0.23349	-0.412823	0.017702	-0.285402	-0.187714	-0.418911	-0.335349	-0.510344	-0.464963	-0.371448	-0.223672	-0.426059	-0.370838	-0.59976	-0.412353
HUXP1043E06	CCDC66	coiled-coil domain containing 66	NM_001012506	285331	12	1	-0.211763	-0.208351	-0.311112	-0.280771	-0.328623	-0.284369	-0.427421	-0.406625	-0.367305	-0.0458037	0.106915	-0.438884	-0.243926	0.210726	-0.369573	-0.378245	-0.190684	-0.547488	-0.31969	-0.127893	-0.456176	-0.534174	-0.291567
SHR020061035E03	TARP	TCR gamma alternate reading frame protein	NM_001003806	445347	12	1	-0.150839	-0.110472	-0.175648	-0.424244	-0.102362	-0.119859	-0.117133	-0.30422	-0.490702	-0.457303	-0.156869	-0.468149	-0.0750044	-0.263034	-0.424351	-0.56277	0.00621852	-0.389947	-0.108725	-0.191905	-0.0384347	-0.451696	-0.159644
HUXP1112G04	AIF1	allograft inflammatory factor 1	NM_032955	199	13	1	-0.224305	-0.18994	-0.282499	-0.175331	-0.119332	-0.158312	-0.256292	-0.0741397	-0.157481	-0.223876	-0.292416	-0.323574	-0.552184	-0.774591	-0.731716	-0.750156	-0.597254	-0.370764	-0.268674	-0.141889	-0.266315	-0.521637	-0.258959
HUXP1058A04	RHOA	ras homolog gene family, member A	NM_001664	387	13	1	-0.171601	-0.078883	-0.0476736	-0.120439	-0.134953	0.0139676	-0.0868642	-0.101979	0.0177292	-0.101655	-0.147398	-0.20977	-0.342321	-0.472652	-0.243151	-0.454986	-0.433082	-0.174679	-0.270007	-0.280552	-0.365435	-0.170885	-0.457876
SHR020061012F11	ARHGAP1	Rho GTPase activating protein 1	NM_004308	392	13	1	-0.0740006	-0.147111	-0.276477	-0.163639	-0.119596	-0.182711	-0.164237	-0.141882	-0.211802	-0.17585	-0.410533	-0.41116	-0.504491	-0.599949	-0.549614	-0.453864	-0.514781	-0.254917	-0.156632	-0.229093	-0.350834	-0.318235	-0.348237
SHR020061012G10	BGN	biglycan	NM_001711	633	13	1	0.088438	-0.139981	-0.115093	-0.355875	-0.0869081	-0.00496625	-0.045443	0.00988151	-0.221027	-0.402371	-0.388697	-0.865591	-0.270398	-0.724993	-0.696165	-0.572138	-0.615465	-0.228624	-0.0577155	-0.149539	0.0838316	-0.472488	-0.40239
HUXP1077E03	ZFP36L2	zinc finger protein 36, C3H type-like 2	U07802	678	13	1	-0.0256157	0.0832207	-0.278301	-0.0658778	0.183351	0.241672	0.174821	-0.145162	-0.35278	-0.58778	-0.38427	-0.398507	-0.617944	-0.585173	-0.536247	-0.519943	-0.470238	-0.285242	-0.296188	-0.130963	0.0260195	-0.0906497	0.0689866
HUXP1041F01	CBFA2T3	core-binding factor, runt domain, alpha subunit 2; translocated to, 3	NM_175931	863	13	1	-0.0207586	-0.0380872	-0.22741	0.222733	-0.165518	-0.0048988	0.0908534	0.0210616	0.0983021	-0.0984485	-0.284977	-0.341307	-0.383559	-0.428334	-0.410788	-0.307734	-0.516962	-0.141472	-0.252936	0.135883	-0.27894	-0.121015	-0.411532
HUXP1077B03	RUNX3	runt-related transcription factor 3	NM_004350	864	13	1	-0.12608	-0.109704	-0.133045	-0.0960018	0.0822011	0.0569024	-0.0795673	0.285542	0.24428	-0.136204	-0.231026	-0.440357	-0.504043	-0.541985	-0.394476	-0.411678	-0.305345	-0.334695	-0.29134	-0.227517	-0.329384	-0.521537	-0.697363
HUXP1075H09	CDK6	cyclin-dependent kinase 6	NM_001259	1021	13	1	-0.307833	-0.335929	-0.291956	-0.1363	-0.0512487	0.0359793	-0.00646225	-0.184353	-0.258669	-0.231947	-0.295875	-0.29214	-0.300981	-0.512951	-0.346746	-0.50633	-0.415904	-0.375128	-0.317398	-0.29575	-0.394341	-0.182343	-0.177897
SHR020061027B02	DAXX	death-associated protein 6	NM_001350	1616	13	1	0.031511	0.0441515	0.151577	0.110756	-0.0203678	-0.0217769	-0.00206247	0.112136	-0.0877585	-0.0520885	-0.225519	-0.49169	-0.245112	-0.377343	-0.357411	-0.342837	-0.431716	-0.379493	-0.264941	-0.447744	-0.418953	-0.251062	-0.521823
HUXP1021C01	DDB2	damage-specific DNA binding protein 2, 48kDa	NM_000107	1643	13	1	-0.0717004	-0.288696	-0.250271	-0.301144	-0.129294	-0.106915	-0.147914	-0.0460401	-0.26248	-0.323722	-0.322505	-0.494148	-0.316488	-0.589809	-0.476616	-0.623562	-0.305559	-0.419259	-0.191949	-0.0485206	-0.117394	-0.450572	-0.376739
HUXP1079A03	SLC26A2	solute carrier family 26 (sulfate transporter), member 2	NM_000112	1836	13	1	-0.119299	-0.174174	-0.257432	-0.27486	0.0248034	-0.01543	-0.132894	-0.270089	-0.595851	0.0339473	-0.0399664	-0.287282	-0.306926	-0.785102	-0.596935	-0.626439	-0.454566	-0.408465	-0.278301	-0.236803	-0.173149	-0.171766	-0.223775
HUXP1061G12	DUSP3	dual specificity phosphatase 3 (vaccinia virus phosphatase VH1-related)	NM_004090	1845	13	1	-0.239905	-0.234896	-0.422571	-0.327102	-0.0456921	-0.0152668	0.0085875	-0.126606	-0.157297	-0.287751	-0.420492	-0.345135	-0.551015	-0.322658	-0.494765	-0.476149	-0.497958	-0.510615	-0.530821	-0.288626	-0.224607	-0.196096	-0.494301
SHR020061004B12	ENG	endoglin (Osler-Rendu-Weber syndrome 1)	NM_000118	2022	13	1	0.238657	-0.316259	-0.189034	-0.278426	-0.131245	-0.188762	-0.113341	-0.257158	0.0206103	-0.349008	-0.445559	-0.389567	-0.391021	-0.549834	-0.541709	-0.314511	-0.292977	-0.243557	0.124726	-0.246161	-0.179169	-0.222392	-0.589138
SHR020060010H01	GFI1	growth factor independent 1	NM_005263	2672	13	1	0.15917	-0.131816	-0.0262793	-0.0288379	-0.0840163	0.0133956	-0.221253	-0.175166	-0.25634	-0.457473	-0.189825	-0.252387	-0.169787	-0.739489	-0.784732	-0.836501	-0.628031	-0.327853	-0.439631	-0.273923	-0.468619	-0.0734622	-0.946177
SHR020061006H12	HDGF	hepatoma-derived growth factor (high-mobility group protein 1-like)	NM_004494	3068	13	1	-0.0801882	-0.0783224	-0.0897719	-0.173892	-0.0474344	-0.0434453	-0.0385949	-0.0409496	-0.067967	-0.107932	-0.242259	-0.311028	-0.372819	-0.56865	-0.535111	-0.62976	-0.745718	-0.490957	-0.416064	-0.337822	-0.366168	-0.252175	-0.392218
HUXP1030A12	KCNH2	potassium voltage-gated channel, subfamily H (eag-related), member 2	NM_014374	3757	13	1	0.0248212	-0.22646	-0.253822	-0.124755	-0.0767871	-0.120821	-0.0550014	-0.0373132	-0.0612701	-0.210114	-0.276878	-0.338671	-0.417727	-0.585747	-0.454176	-0.295007	-0.631092	NaN	-0.102877	0.0347654	-0.271805	-0.271104	-0.156312
HUXP1018H08	LGALS3BP	lectin, galactoside-binding, soluble, 3 binding protein	NM_005567	3959	13	1	-0.0989665	0.11757	-0.315065	NaN	-0.0588937	-0.137504	0.0701261	-0.247928	0	-0.249172	-0.317341	-0.54565	-0.316735	-0.612114	-0.0917925	-0.552226	-0.70156	NaN	-0.175087	0.0622843	0.00749454	-0.0874628	-0.127614
SHR020061028C06	LRP3	low density lipoprotein receptor-related protein 3	NM_002333	4037	13	1	0.0101718	-0.123154	-0.0353983	-0.0105637	-0.0944995	-0.0357066	-0.11039	0.0384035	-0.316107	-0.217496	-0.18596	-0.491676	-0.297079	-0.343484	-0.516169	-0.645296	-0.716676	-0.535423	-0.412089	-0.235628	-0.268726	-0.192061	-0.416062
HUXP1012A01	NF2	neurofibromin 2 (bilateral acoustic neuroma)	NM_016418	4771	13	1	-0.017114	-0.138183	0.00436519	-0.0862081	0.130061	-0.0677901	-0.0278179	-0.0306316	-0.205975	0.0365838	-0.188693	-0.205319	-0.220104	-0.353515	-0.351472	-0.37735	-0.429766	-0.281893	-0.283666	-0.185925	-0.183367	-0.147557	-0.26404
HUXP1074B10	NFE2	nuclear factor (erythroid-derived 2), 45kDa	NM_006163	4778	13	1	-0.0140069	-0.0978976	0.0386805	0.0959106	0.0624126	0.00566875	-0.0922968	0.118239	-0.043988	-0.176157	-0.259935	-0.532874	-0.248576	-0.588657	-0.589212	-0.296096	-0.446462	-0.114035	0.137504	0.0751574	-0.00996684	-0.148735	-0.103446
SHR020060020B09	OGG1	8-oxoguanine DNA glycosylase	NM_016826	4968	13	1	0.0421255	-0.175442	-0.136502	-0.023459	-0.163058	0	-0.0944647	-0.0703893	-0.0655883	-0.536599	-0.244734	-0.357157	-0.207158	-0.241527	-0.517848	-0.476753	NaN	-0.257158	-0.277368	-0.0531113	0.0273073	NaN	-0.152003
HUXP1084C11	PAFAH1B3	platelet-activating factor acetylhydrolase, isoform Ib, gamma subunit 29kDa	NM_002573	5050	13	1	-0.177949	0.0742546	-0.193183	-0.110619	-0.0239599	-0.128188	-0.122187	-0.0942687	-0.0403014	-0.109973	-0.220447	-0.16183	-0.239089	-0.357552	-0.406854	-0.607683	-0.581642	-0.589212	-0.425512	-0.452325	-0.365517	-0.133678	-0.245612
HUXP1067H03	PDK3	pyruvate dehydrogenase kinase, isozyme 3	NM_005391	5165	13	1	0.108706	0.0351894	-0.115108	0.165912	0.0434393	-0.371256	-0.342036	-0.0715533	0.0452293	-0.0452293	-0.0299015	-1	-0.404666	-0.686692	-1.05387	-0.5281	-0.541894	-0.446167	-0.208512	-0.509912	0.0899814	-0.156119	-0.667425
HUXP1002A04	PGAM1	phosphoglycerate mutase 1 (brain)	NM_002629	5223	13	1	0.0561985	0.0831404	0.0873346	-0.0205119	-0.0192417	0.0242877	0.0080723	-0.0137536	0.0311646	-0.0434312	0.00692156	-0.178677	-0.379602	-0.579135	-0.550527	-0.743847	-0.807115	-0.499237	-0.510461	-0.273489	-0.288715	-0.501649	-0.272324
HUXP1101B08	PITPNA	phosphatidylinositol transfer protein, alpha	NM_006224	5306	13	1	-0.287981	-0.17358	-0.334001	-0.246915	-0.156119	NaN	-0.190522	-0.201048	0.116193	0	-0.463947	-0.548063	-0.434546	-0.369	-0.545161	-0.418713	-0.336283	-0.350497	-0.26628	-0.476028	-0.0455626	-0.106128	-0.117108
HUXP1085F04	POLR2I	polymerase (RNA) II (DNA directed) polypeptide I, 14.5kDa	NM_006233	5438	13	1	-0.148835	-0.115517	-0.0873638	-0.0226691	-0.140115	-0.192475	-0.155197	0.0599367	-0.239771	-0.173917	-0.275844	-0.314434	-0.293511	-0.472033	-0.422073	-0.412993	-0.465575	-0.424158	-0.301361	-0.384664	-0.271236	-0.152525	-0.287181
HUXP1059C03	POLR2L	polymerase (RNA) II (DNA directed) polypeptide L, 7.6kDa	NM_021128	5441	13	1	0.0167289	0.0619703	0.0474934	0.0484573	0.0427606	-0.081923	-0.00722026	-0.0142865	0.0476435	-0.14749	-0.214862	-0.192329	-0.308382	-0.388232	-0.485216	-0.493232	-0.669655	-0.395067	-0.282092	-0.326351	-0.523442	-0.113887	-0.109091
HUXP1040G11	PREP	prolyl endopeptidase	NM_002726	5550	13	1	-0.106451	-0.167794	-0.0160005	-0.0978976	-0.0370893	-0.0506261	-0.0193006	-0.0853915	-0.19977	-0.117722	-0.113413	-0.132894	-0.253989	-0.441838	-0.537657	-0.523562	-0.418358	-0.537474	-0.35503	-0.21864	-0.186096	-0.0327899	-0.330676
SHR020061003D09	PRH2	proline-rich protein HaeIII subfamily 2	NM_005042	5555	13	1	0.113317	0.169019	-0.128786	-0.106915	-0.172837	0.125531	0.139622	-0.63743	0.0111406	-0.0820711	-0.135352	-0.356431	-0.389947	-0.248788	-0.335103	-0.330056	NaN	-0.295456	-0.372302	-0.31969	-0.142019	-0.47598	-0.447066
HUXP1173A06	TRIM27	tripartite motif-containing 27	NM_006510	5987	13	1	0.147307	-0.132852	-0.0359196	0.0597722	-0.0215653	-0.0572249	-0.192645	0.0197362	0.159605	0.0234167	-0.250894	-0.638856	-0.609586	-0.538096	-0.473679	-0.323315	-0.582703	-0.338802	-0.298946	-0.140373	-0.137159	-0.161213	-0.462557
SHR020061022C07	RYR1	ryanodine receptor 1 (skeletal)	NM_000540	6261	13	1	-0.0857299	-0.2199	-0.0762106	-0.103378	0.0132156	-0.0608252	-0.0871917	-0.0154714	-0.152003	0.0532118	-0.245112	-0.422233	-0.315654	-0.472688	-0.639206	-0.709053	-0.688641	-0.485427	-0.195869	-0.147625	-0.0170735	0.143195	0.0822011
SHR020060010F02	SOX12	SRY (sex determining region Y)-box 12	NM_006943	6666	13	1	0.14439	-0.279737	0.0580056	0.0318841	0.00904514	0.161967	-0.0101242	0.0909085	-0.0965733	-0.541301	-0.489038	-0.209228	-0.371969	-0.4333	-0.293536	-0.189342	-0.446256	-0.510962	-0.555337	-0.384918	-0.307429	-0.302563	-0.35435
HUXP1001A11	STAR	steroidogenic acute regulator	NM_000349	6770	13	1	-0.0750134	-0.253341	-0.113075	-0.11368	0.0581281	0.0458037	0.0215153	0.124522	0.127788	-0.118582	-0.303969	-0.117732	-0.325065	-0.635646	-0.638024	-0.644238	-0.621488	-0.48248	-0.375671	-0.15875	-0.376203	-0.342525	-0.22991
HUXP1128A08	TERF2	telomeric repeat binding factor 2	NM_005652	7014	13	1	-0.233097	-0.354843	0.117618	-0.0273505	-0.106309	-0.0870856	-0.186963	-0.114936	NaN	-0.328749	-0.328054	-0.409724	-0.560201	-0.618129	-0.298967	-0.321469	-0.237692	-0.207	-0.18233	-0.374396	-0.344446	-0.200819	-0.372752
HUXP1004C12	ZNF22	zinc finger protein 22 (KOX 15)	NM_006963	7570	13	1	-0.0708268	-0.32651	-0.126881	-0.114142	-0.0470718	0	-0.0619349	-0.0635576	-0.22595	-0.237692	0.0342261	-0.337133	-0.45111	-0.394952	-0.406889	-0.59364	-0.472915	-0.397728	-0.414494	-0.226024	-0.403507	-0.440395	-0.180038
HUXP1128E03	ZNF207	zinc finger protein 207	NM_003457	7756	13	1	-0.0174874	-0.196951	-0.0664822	-0.136326	0.0176792	-0.00168244	0.109482	-0.0214012	-0.127844	-0.056216	-0.11109	-0.190951	-0.236508	-0.435325	-0.364664	-0.43599	-0.342951	-0.292728	-0.211242	-0.21609	-0.231026	-0.212385	-0.28197
HUXP1104D11	FCN3	ficolin (collagen/fibrinogen domain containing) 3 (Hakata antigen)	NM_173452	8547	13	1	-0.0245687	-0.134957	-0.116058	-0.0513604	-0.0553074	-0.0805775	-0.0903862	-0.211375	-0.0995357	-0.101086	-0.288692	-0.173817	-0.316876	-0.485743	-0.536213	-0.563502	-0.595532	-0.319212	-0.339458	-0.229798	-0.574577	-0.342004	-0.111965
HUXP1125C04	RAB11A	RAB11A, member RAS oncogene family	NM_004663	8766	13	1	-0.0649554	0.0320612	-0.076924	-0.129848	0.114367	0.0619277	0.0189582	-0.0078836	-0.0218044	0.0683371	-0.0492435	-0.214505	-0.368065	-0.634716	-0.486844	-0.670035	-0.484578	-0.423559	-0.394279	-0.332446	-0.445653	-0.449684	-0.237225
HUXP1120D12	CFLAR	CASP8 and FADD-like apoptosis regulator	NM_003879	8837	13	1	-0.0811961	-0.161605	-0.123294	0.0132358	0.0448542	-0.110054	-0.0915335	-0.209034	-0.00537317	-0.18194	-0.295985	-0.283793	-0.374165	-0.419497	-0.351763	-0.419903	-0.396517	-0.151066	-0.251894	-0.140073	-0.30849	-0.357894	0.0388509
HUXP1117F09	BTRC	beta-transducin repeat containing	NM_033637	8945	13	1	-0.162271	-0.193681	-0.143909	-0.0443941	0.0824622	NaN	-0.0480943	-0.321928	-0.328949	0.0677446	-0.113009	-0.121562	-0.426009	-0.537657	NaN	-0.369757	NaN	NaN	-0.347923	-0.174679	-0.181607	NaN	-0.523562
SHR020061018B11	PKMYT1	protein kinase, membrane associated tyrosine/threonine 1	NM_004203	9088	13	1	0.061751	-0.00744426	-0.14439	0.101789	-0.0336504	-0.070592	0.0265263	0.11873	0.0775829	-0.081877	-0.199564	-0.465455	-0.335603	-0.464804	-0.409324	-0.388017	-0.465053	-0.496109	-0.306918	-0.181656	-0.360469	-0.185303	-0.461512
HUXP1168F02	CRSP2	cofactor required for Sp1 transcriptional activation, subunit 2, 150kDa	NM_004229	9282	13	1	-0.0983021	-0.41889	-0.175087	-0.24952	-0.150243	-0.298762	0.0349761	-0.0465426	NaN	-0.288125	-0.252387	-0.17148	-0.437299	-0.620066	-0.330473	-0.624855	NaN	-0.251539	-0.181447	-0.279382	-0.0848889	-0.548437	-0.292553
HUXP1067B12	CHST2	carbohydrate (N-acetylglucosamine-6-O) sulfotransferase 2	NM_004267	9435	13	1	-0.019912	-0.0285999	0.131644	0.118266	-0.123436	0.0207013	0.0138693	0.184767	0.335008	-0.0276858	-0.239548	-0.469814	-0.456517	-0.754066	-0.50402	-0.60888	-0.509555	0.0578684	-0.104077	-0.0199496	-0.124309	-0.214478	-0.486875
HUXP1198C07	RASAL2	RAS protein activator like 2	NM_170692	9462	13	1	0.173767	-0.0780025	-0.131006	-0.133751	-0.157541	0.217591	0.0870717	0.0852473	0.0848889	0.0605415	-0.10758	NaN	-0.437405	-0.168976	-0.537657	-0.474909	-0.438121	-0.263034	-0.716207	-0.486782	-0.185867	-0.411898	-0.450984
SHR020061027E12	MAGEC1	melanoma antigen family C, 1	NM_005462	9947	13	1	-0.0568064	-0.240852	-0.155031	-0.225812	0.0396491	-0.0614005	-0.0599425	-0.0458037	-0.0177747	-0.0507881	-0.254489	-0.0629313	-0.229246	-0.448862	-0.573412	-0.729352	-0.736966	-0.494765	-0.601082	-0.190684	-0.311202	-0.171335	-0.136021
HUXP1172H02	RABEPK	Rab9 effector protein with kelch motifs	Hs.19012	10244	13	1	0.101361	0.0883559	0.091261	0.202896	0.152003	-0.0484404	0.0677446	-0.0388192	-0.0976816	-0.0527705	-0.146572	-0.103556	-0.19881	-0.559291	-0.400864	-0.522048	-0.756271	-0.463711	-0.424315	-0.198254	-0.240134	-0.228672	-0.256098
SHR020060016A06	SIRPB1	signal-regulatory protein beta 1	NM_006065	10326	13	1	-0.0285692	0.31969	-0.0911479	-0.229868	-0.280108	-0.065095	0.0881309	-0.459432	0.0864148	-0.0810716	-0.0701261	-0.373458	-0.169925	-0.56976	-0.515921	-0.553802	NaN	NaN	-0.579549	-0.218424	-0.353016	-0.0374747	0.148863
HUXP1020E06	PPIH	peptidylprolyl isomerase H (cyclophilin H)	NM_006347	10465	13	1	-0.00914838	0.0979077	-0.103991	-0.144205	-0.180429	0.0572042	0	0.0319531	0.0874026	0.123888	-0.112629	-0.156504	-0.0970805	-0.678072	-0.44774	-0.742964	-0.630878	-0.533637	-0.473823	-0.438846	-0.248516	-0.180003	-0.39631
HUXP1177D03	POLR3G	polymerase (RNA) III (DNA directed) polypeptide G (32kD)	Hs.282387	10622	13	1	-0.0552824	-0.0846398	-0.0154714	-0.553078	-0.109229	-0.0430687	-0.0870406	0.0995357	0.0285692	-0.134093	-0.0365259	-0.19977	-0.328471	-0.459432	-0.418143	-0.70044	NaN	NaN	-0.526069	-0.219966	-0.103093	-0.133267	0.0455969
HUXP1053H04	C1orf2	chromosome 1 open reading frame 2	NM_006589	10712	13	1	-0.231423	-0.147821	-0.0247561	0.0520885	-0.166329	0.0140409	-0.117778	0.0292943	-0.348186	-0.261741	-0.482016	-0.19045	-0.346651	-0.412998	-0.422995	-0.369415	-0.486077	-0.538096	-0.426127	0.0444995	-0.536053	-0.31895	0.170454
HUXP1077D11	IQGAP2	IQ motif containing GTPase activating protein 2	NM_006633	10788	13	1	-0.133267	-0.135905	-0.11463	-0.0556736	-0.183712	-0.208296	-0.238638	-0.265097	-0.198004	-0.383329	-0.123806	-0.261106	-0.417374	-0.460582	-0.374066	-0.535679	-0.443287	-0.0839388	-0.152003	0.0210483	-0.124816	-0.563901	-0.374732
HUXP1067C01	STARD3	START domain containing 3	NM_006804	10948	13	1	-0.0709084	-0.0454155	-0.0406126	-0.0529613	0.0340978	-0.0171073	-0.0933505	0.0683253	-0.0419789	0.0027195	-0.134688	-0.169692	-0.278301	-0.499865	-0.576272	-0.456495	-0.319744	-0.371528	-0.196864	0.0193254	-0.217785	-0.258152	-0.153876
HUXP1164C05	MAPRE2	microtubule-associated protein, RP/EB family, member 2	NM_014268	10982	13	1	-0.114864	-0.10359	-0.191846	-0.220322	-0.222006	-0.128533	-0.104837	-0.144166	-0.161954	-0.10346	-0.249404	-0.166192	-0.420067	-0.562506	-0.450933	-0.623242	-0.518965	-0.302361	-0.243534	-0.253394	-0.174617	-0.479413	-0.100853
HUXP1032H05	GPR44	G protein-coupled receptor 44	NM_004778	11251	13	1	-0.0377767	0.177891	0.153263	0.111679	0.212917	0.0929026	0.0464985	0.15415	-0.0713846	0.0441084	-0.0950898	-0.0565835	-0.448539	-0.662832	-0.628183	-0.650081	-0.743603	-0.266907	-0.19831	0.0451994	-0.353637	-0.289206	-0.196074
HUXP1053C06	CBX3	chromobox homolog 3 (HP1 gamma homolog, Drosophila)	NM_016587	11335	13	1	-0.133896	-0.0699594	-0.159057	-0.0857817	-0.183864	-0.00442681	0.0379208	-0.0598589	0.0821782	-0.201738	-0.0854221	-0.197984	-0.458312	-0.29828	-0.355008	-0.703344	-0.474587	-0.354042	-0.479086	-0.0522819	-0.289919	-0.313227	-0.227733
HUXP1018C10	SYNPO	synaptopodin	Hs.435228	11346	13	1	-0.0667261	-0.138596	-0.00964157	-0.178013	-0.019375	-0.110852	0.0503841	0.135446	-0.189846	-0.120185	-0.326586	-0.154446	-0.33588	-0.357986	-0.453417	-0.475756	-0.480341	-0.29716	-0.447094	-0.305272	-0.362439	-0.170556	-0.287034
HUXP1004B01	GGA2	golgi associated, gamma adaptin ear containing, ARF binding protein 2	Hs.460336	23062	13	1	-0.0192362	-0.130809	-0.30589	-0.100367	-0.0517825	-0.0159415	-0.0257631	-0.0331669	-0.152647	-0.23967	-0.155119	-0.33985	-0.417531	-0.291766	-0.490986	-0.421827	-0.34861	-0.19592	-0.160823	-0.0552295	-0.216318	-0.0443941	-0.0709218
HUXP1162E08	NCDN	neurochondrin	NM_001014841	23154	13	1	-0.319542	-0.0621412	-0.0641303	-0.106586	-0.137504	0.0367118	-0.0694648	0.030861	-0.0874628	-0.273565	-0.264763	-0.666757	-0.427638	-0.620152	NaN	-0.416813	-0.432959	NaN	-0.31774	NaN	-0.299014	NaN	-0.639531
HUXP1107A01	MACF1	microtubule-actin crosslinking factor 1	AK023821	23499	13	1	-0.0249824	-0.313525	-0.138904	-0.0801441	-0.129244	-0.239575	-0.195518	-0.263353	-0.145097	-0.142257	-0.260528	-0.173638	-0.366747	-0.466675	-0.491718	-0.632699	-0.702486	-0.404941	-0.460125	-0.226602	-0.400945	-0.0711332	-0.138952
SHR020061006H02	TXN2	thioredoxin 2	NM_012473	25828	13	1	-0.10044	-0.024453	-0.187184	-0.231464	-0.0490848	-0.106406	-0.134037	0.150515	-0.0101599	-0.0784923	-0.146966	-0.22115	-0.221062	-0.321343	-0.429465	-0.354573	-0.467986	-0.269607	-0.166377	0.0363215	-0.24878	0.0311946	-0.128164
HUXP1057B05	ANAPC13	anaphase promoting complex subunit 13	NM_015391	25847	13	1	-0.107323	0.12886	-0.0553768	-0.0135678	0.0735566	0.0908534	0.0667871	0.0398645	-0.00533344	-0.0257376	0	-0.253643	-0.325524	-0.492371	-0.426135	-0.596593	-0.356719	-0.237304	-0.220082	-0.12063	-0.433167	-0.28165	-0.181066
HUXP1059A04	ZDHHC9	zinc finger, DHHC-type containing 9	NM_001008222	51114	13	1	-0.0179219	-0.15788	-0.237039	-0.0336831	-0.148863	0.0163018	-0.252766	-0.366428	-0.277985	NaN	-0.188662	-0.181447	-0.389274	-0.595934	-0.471451	-0.438121	-0.371367	-0.321928	-0.204539	0.0794345	-0.153623	NaN	-0.0995357
HUXP1036H07	PCYOX1	prenylcysteine oxidase 1	NM_016297	51449	13	1	-0.223965	-0.175783	-0.0720112	0.0494122	0.0204641	0.203533	-0.0475004	-0.0931094	-0.383004	-0.239466	-0.218001	-0.228028	-0.473564	-0.789321	-0.399096	-0.645335	-0.273018	-0.426625	-0.164387	0.038889	-0.496305	-0.555389	-0.337441
HUXP1205B07	CUTA	cutA divalent cation tolerance homolog (E. coli)	NM_001014840	51596	13	1	0.00483964	-0.246018	0.150688	-0.0263957	0.0743346	0.0273031	-0.0465851	-0.034875	-0.0270151	-0.318726	-0.347923	-0.318926	-0.521577	-0.528763	-0.504195	-0.541415	-0.620327	-0.499926	-0.450724	-0.367535	-0.452976	-0.362988	-0.418299
HUXP1025D11	KLF13	Kruppel-like factor 13	NM_015995	51621	13	1	0.0384741	-0.366337	-0.110578	-0.00479567	-0.0751195	-0.204092	-0.0410922	0.0167174	0.209299	-0.14093	-0.64409	-0.827713	-0.759333	-0.735078	-0.516604	-0.104222	-0.398341	0.0895974	0.0430212	-0.165454	-0.124179	-0.332575	-0.430393
HUXP1040F01	KIAA1128	KIAA1128	NM_018999	54462	13	1	0.0321804	-0.125531	-0.0404349	-0.12619	-0.0310269	0.134301	-0.0195226	0.0383463	-0.271027	-0.0418202	-0.154577	-0.217846	-0.346922	-0.471232	-0.648015	-0.499571	-0.385784	-0.528819	-0.381563	-0.320368	-0.369838	0.0143553	-0.352907
HUXP1127D05	EGLN1	egl nine homolog 1 (C. elegans)	CR604521	54583	13	1	-0.0605415	-0.27678	-0.293145	-0.2638	-0.160077	0.0480943	-0.0255351	-0.180963	-0.31034	-0.229926	-0.319068	-0.431526	-0.398262	-0.770286	-0.430351	-0.557306	-0.221172	-0.242977	-0.283279	-0.379493	-0.26976	-0.180035	-0.361598
HUXP1106C06	ARMC1	armadillo repeat containing 1	AL512767	55156	13	1	-0.0502899	0.0518159	-0.0446109	-0.0146574	-0.0941514	-0.0446931	-0.0801313	0.129984	0.0167757	0.155069	-0.156579	-0.153913	-0.244197	-0.493968	-0.36606	-0.310382	-0.526069	-0.191481	-0.327669	0.0789668	-0.420066	-0.166323	-0.220048
HUXP1031B06	IMP3	IMP3, U3 small nucleolar ribonucleoprotein, homolog (yeast)	NM_018285	55272	13	1	-0.108763	0.0296455	0.104317	0.12237	0.142841	0.201892	0.125925	0.0927571	-0.0267364	-0.156558	-0.235244	-0.178117	-0.591431	-0.875553	-0.571157	-0.58679	-0.800105	-0.539065	-0.309139	-0.228269	-0.414428	-0.536856	-0.155634
HUXP1062D09	NOLA3	nucleolar protein family A, member 3 (H/ACA small nucleolar RNPs)	NM_018648	55505	13	1	-0.224983	-0.309038	-0.0762692	-0.0140517	-0.217935	-0.118041	-0.234061	-0.258515	-0.212607	-0.340727	-0.32935	-0.180169	-0.593688	-0.584963	-0.460853	-0.733145	-0.625692	-0.378982	-0.27566	0.0659694	-0.212368	-0.267331	-0.0986444
HUXP1163B01	GALNT10	UDP-N-acetyl-alpha-D-galactosamine:polypeptide N-acetylgalactosaminyltransferase 10 (GalNAc-T10)	AK023815	55568	13	1	-0.111156	-0.145551	-0.103921	-0.156069	-0.0692136	-0.197055	-0.0614462	0.0984599	-0.117727	-0.299532	-0.317504	-0.367104	-0.319895	-0.413768	-0.418746	-0.405688	-0.524891	-0.372249	0.00349004	-0.312803	-0.381871	-0.182969	-0.247021
HUXP1016B01	THUMPD1	THUMP domain containing 1	NM_017736	55623	13	1	-0.142958	-0.0673463	0.0433675	-0.418604	-0.0462318	0.0552824	0.0669584	0.0414766	-0.0863248	-0.0920943	0.0104355	-0.232885	-0.415037	-0.544583	-0.341202	-0.504086	-0.411462	-0.415037	-0.26879	-0.201349	-0.419654	-0.154273	-0.28751
SHR020061011B04	GLT8D1	glycosyltransferase 8 domain containing 1	NM_152932	55830	13	1	-0.111852	-0.0207586	-0.0871692	-0.144282	-0.0816838	0	-0.00955431	-0.377505	-0.25464	-0.0528334	-0.0907655	-0.195334	-0.391659	-0.584963	-0.573647	-0.499614	-0.40227	-0.366038	-0.137717	-0.188072	0.0805434	-0.167457	-0.38536
HUXP1112E09	UBQLN4	ubiquilin 4	NM_020131	56893	13	1	-0.10276	-0.0626709	-0.0534393	0.00842452	-0.104227	-0.0671142	-0.096319	0.183864	-0.141728	0.0783879	-0.172985	-0.42829	-0.309006	-0.50696	-0.534336	-0.329632	-0.624491	-0.647484	-0.451137	-0.342489	-0.17897	-0.0187366	-0.521577
HUXP1045C09	CDC42SE2	CDC42 small effector 2	Hs.508829	56990	13	1	-0.0586542	-0.174029	-0.161155	-0.103545	0.06498	0.0780025	0.0880562	-0.140863	-0.040898	-0.00341466	-0.0774561	-0.149799	-0.329636	-0.608031	-0.480391	-0.491152	-0.488101	-0.23173	-0.271302	-0.0731477	-0.0479532	-0.0810147	-0.0288287
HUXP1168B07	DDX24	DEAD (Asp-Glu-Ala-Asp) box polypeptide 24	NM_020414	57062	13	1	-0.0520051	-0.0221647	-0.0936627	-0.135316	-0.0901733	-0.135713	-0.0374747	-0.14564	-0.0235668	-0.0178379	-0.11555	-0.285114	-0.19515	-0.409348	-0.460498	-0.384411	-0.527247	-0.270683	-0.392462	-0.339956	-0.176007	-0.288492	-0.349325
HUXP1041G09	C20orf59	chromosome 20 open reading frame 59	NM_022082	63910	13	1	0.0798007	-0.111203	-0.268817	0.201779	-0.338585	-0.0291463	0.104023	-0.176878	0.0715533	-0.149747	-0.284729	-0.419483	-0.461754	-0.239466	-0.435215	-0.307101	-0.847997	-0.020909	-0.268703	0	-0.306584	-0.0725125	-0.468886
HUXP1002C08	MRPL36	mitochondrial ribosomal protein L36	NM_032479	64979	13	1	-0.0310465	-0.0736796	0.0314021	0.0621172	-0.027595	-0.029641	-0.0486229	-0.199426	-0.0863666	-0.22575	-0.342106	-0.266	-0.498206	-0.505683	-0.491422	-0.62298	-0.650523	-0.43082	-0.339842	-0.13562	-0.29536	-0.197674	-0.0205526
HUXP1019D11	WDR61	WD repeat domain 61	NM_025234	80349	13	1	-0.0973754	-0.201048	-0.0845335	-0.149747	-0.0918737	-0.124951	-0.0791702	-0.0791439	0.0817146	-0.187733	-0.0519011	-0.109847	-0.261921	-0.364114	-0.363207	-0.551052	-0.45626	-0.198904	-0.28075	-0.124971	-0.388312	-0.10046	-0.233797
HUXP1128A05	TMEM14B	transmembrane protein 14B	NM_030969	81853	13	1	-0.0552354	-0.0538669	-0.20285	-0.0285402	0.0362664	-0.0206671	-0.0380562	-0.234601	0.0713636	0.0521605	-0.127296	-0.867245	-0.244255	-0.310783	-0.333566	-0.375679	-0.421048	-0.160715	-0.254305	-0.14439	-0.318833	-0.329824	-0.164792
HUXP1067D01	ACAD11	acyl-Coenzyme A dehydrogenase family, member 11	NM_032169	84129	13	1	-0.141878	-0.154379	-0.197427	-0.0870096	-0.0197528	-0.0708383	-0.130234	0.073424	-0.030328	0.126045	-0.237708	-0.405225	-0.515862	-0.513353	-0.657348	-0.517317	-0.536488	-0.402098	-0.126665	-0.0500769	-0.106243	-0.0482091	-0.208727
HUXP1060E06	TMTC4	transmembrane and tetratricopeptide repeat containing 4	NM_032813	84899	13	1	-0.0230836	-0.417456	-0.0811368	-0.0107264	-0.027745	NaN	-0.0882272	-0.0313642	-0.0435016	NaN	0.0368368	-0.319279	-0.248624	-0.385654	NaN	-0.458106	NaN	NaN	-0.142294	0.049582	-0.131644	NaN	-0.343587
HUXP1199A10	MGC14327	hypothetical protein MGC14327	NM_053045	94107	13	1	-0.0106735	-0.079982	-0.0633951	-0.0778917	-0.055343	-0.0916998	-0.185379	-0.330824	-0.256775	-0.165839	-0.382857	-0.465798	-0.418518	-0.600097	-0.569109	-0.413762	-0.877257	-0.517399	-0.417557	-0.415917	-0.358954	-0.137942	-0.386099
HUXP1196B04	SLC35A4	solute carrier family 35, member A4	NM_080670	113829	13	1	0.085954	0.305476	-0.155185	0.178092	0.123502	0.0459754	-0.0672011	-0.00301189	0.0999669	-0.259644	-0.347333	-0.386058	-0.442233	-0.625291	-0.647611	-0.508409	-0.282099	-0.295456	-0.258384	-0.467505	-0.425049	-0.380822	-0.358527
HUXP1055G05	VKORC1L1	vitamin K epoxide reductase complex, subunit 1-like 1	Hs.427232	154807	13	1	-0.0164881	-0.0135891	-0.0934866	-0.16665	0.0139392	0	-0.117458	-0.438884	-0.138131	-0.00958605	-0.105353	-0.0159415	-0.395255	-0.680658	-0.475338	-0.565597	-0.603341	-0.25634	-0.308122	-0.0659633	-0.211919	-0.0803734	-0.112579
HUXP1090C02	LOC203547	hypothetical protein LOC203547	NM_001017980	203547	13	1	-0.19189	-0.0754557	-0.0691305	-0.0379106	-0.0286954	0.00270929	-0.0243617	-0.0613473	-0.0223527	-0.0169482	-0.00317658	-0.149629	-0.309125	-0.406795	-0.271185	-0.597666	-0.653184	-0.376389	-0.479302	-0.268134	-0.290888	-0.129753	-0.222005
HUXP1102C03	NT5DC1	5'-nucleotidase domain containing 1	NM_152729	221294	13	1	-0.212545	-0.0437214	-0.444785	-0.158857	-0.128065	-0.0458037	-0.186413	-0.172467	-0.0200378	-0.0796172	0.0116818	-0.0537713	-0.278413	-0.49581	-0.572705	-0.791683	-0.401617	-0.545161	-0.275341	-0.114333	-0.32567	-0.31982	-0.207595
HUXP1126B05	GSTK1	glutathione S-transferase kappa 1	NM_015917	373156	13	1	-0.0292409	-0.0868775	-0.00381161	0.0551416	-0.0189297	0.0196734	-0.0169931	-0.0877466	-0.224602	-0.00411317	-0.139828	-0.243766	-0.150025	-0.549085	-0.417598	-0.297905	-0.337719	-0.228865	-0.285018	-0.246849	0.0562259	-0.279477	-0.208993
HUXP1012H05	LOC401152	HCV F-transactivated protein 1	NM_001001701	401152	13	1	0.015992	-0.144722	-0.182899	-0.122641	-0.0590702	-0.110984	-0.131988	-0.196426	-0.0282136	-0.135117	-0.249046	-0.176808	-0.488286	-0.556485	-0.42303	-0.471891	-0.263034	-0.09586	-0.22393	-0.137581	-0.331082	-0.361438	-0.169524
HUXP1061F10	ADCYAP1	adenylate cyclase activating polypeptide 1 (pituitary)	NM_001117	116	14	1	-0.142958	0.229134	0.135088	0.111645	0.0582986	-0.0763509	-0.0614005	-0.0740006	-0.0624641	0.0297473	-0.0664954	-0.0423108	-0.0554951	-0.395229	NaN	-0.302563	NaN	NaN	-0.0558532	-0.104108	-0.527064	-0.411069	-0.348804
HUXP1055D04	CFL1	cofilin 1 (non-muscle)	NM_005507	1072	14	1	0.0215904	0.147992	0.233591	0.0483935	-0.00248797	0.105566	0.0457476	0.350714	0.0129553	0.120127	-0.106302	0.0622275	-0.0595391	-0.411992	-0.314271	-0.265844	-0.342939	-0.177415	-0.172105	-0.0678816	-0.607149	-0.20691	-0.36456
HUXP1119G03	CYP2D6	cytochrome P450, family 2, subfamily D, polypeptide 6	Hs.333497	1565	14	1	-0.166819	0.0546353	0.225292	0.0690416	-0.0252373	-0.0281969	0.0815738	0.049582	0.0806185	0.226276	0.142019	0.0817941	0.0740006	-0.197262	-0.0675633	-0.151244	0	NaN	0.0759489	-0.0801703	-0.510416	NaN	-0.417456
HUXP1117G12	EEF1B2	eukaryotic translation elongation factor 1 beta 2	NM_001959	1933	14	1	-0.0365779	0.116999	-0.0678352	-0.0655427	0.131848	-0.03644	0.0700734	0.10519	0.162309	0.11042	-0.0125731	0.138732	-0.069322	0.0796574	-0.0636184	-0.37447	-0.084339	-0.079509	-0.345814	-0.336972	-0.664811	-0.0473903	-0.26363
HUXP1018F07	EPB41L1	erythrocyte membrane protein band 4.1-like 1	NM_012156	2036	14	1	-0.0162822	0.101435	0.108335	0.118222	0.0254401	0.00340303	-0.0162794	0.0317155	0.0890969	0.0805376	-0.0490375	0.292256	-0.0233571	-0.265213	-0.0837508	-0.197983	-0.212608	-0.195537	-0.239535	-0.0619745	-0.653983	-0.344095	-0.254227
HUXP1051C10	GBP1	guanylate binding protein 1, interferon-inducible, 67kDa	NM_002053	2633	14	1	-0.0127862	0.116767	-0.0552499	0.0137183	0.0574855	-0.0282337	-0.0407463	0.139725	-0.0724518	-0.0664516	0.125228	0.151142	-0.23489	-0.0410273	-0.227069	-0.241852	-0.328501	-0.343954	-0.281094	-0.219966	-0.620713	-0.594678	-0.143104
HUXP1024C10	MSH6	mutS homolog 6 (E. coli)	NM_000179	2956	14	1	0.036154	0.225588	0.181862	0.118239	0.051158	0.327028	0.255004	0.042791	0.198981	-0.0573581	0.102796	0.0698648	-0.330727	-0.2121	0.0451726	-0.243926	-0.100929	-0.33812	-0.410026	-0.27081	-0.452792	-0.526122	-0.190368
HUXP1140H07	HINT1	histidine triad nucleotide binding protein 1	NM_005340	3094	14	1	-0.0662231	-0.000890156	0.0936286	-0.0746045	-0.0929397	0.00266057	-0.00225113	0.262296	-0.0740677	-0.143665	-0.108591	-0.0207926	-0.194626	-0.0761696	-0.143259	-0.236424	-0.320033	-0.311364	-0.257406	-0.080286	-0.641118	-0.605049	-0.343602
HUXP1132A01	RANBP5	RAN binding protein 5	NM_002271	3843	14	1	0.0329102	0.046377	0.105589	0.0117964	0.0249113	-0.0685826	-0.00479142	-0.167449	-0.155918	-0.139236	0.160964	-0.0387806	0.153351	0.00508104	-0.0196288	-0.357081	-0.322663	-0.460905	-0.311412	-0.389196	-0.577434	-0.696503	-0.440292
HUXP1084C01	MEIS2	Meis1, myeloid ecotropic viral integration site 1 homolog 2 (mouse)	NM_172316	4212	14	1	-0.0491368	0.044653	-0.0078836	-0.0627581	0	-0.0876146	-0.00685774	-0.0122091	0.00967444	-0.0443348	0.0331376	0.0938438	-0.108336	-0.275073	-0.167561	-0.261741	-0.301381	-0.255194	-0.20637	-0.241675	-0.451612	-0.532469	-0.183853
HUXP1043G12	GADD45B	growth arrest and DNA-damage-inducible, beta	NM_015675	4616	14	1	-0.152003	0.26357	0.165912	0.148323	0.180572	0.36257	0.475579	0.728872	0.189695	0.0780025	-0.146549	-0.199309	0.0461702	-0.133267	0.100564	0.0384741	0.231119	-0.242458	-0.0854693	-0.352672	-0.762308	-0.628031	-0.413441
HUXP1210C05	RPL10A	ribosomal protein L10a	NM_007104	4736	14	1	0.0389185	-0.0864166	0.0572096	-0.00181395	-0.10366	-0.0707897	0.0101854	0.0987701	0.0598575	-0.0235473	-0.0905451	0.266998	-0.0696668	-0.0863696	0.115549	-0.244462	-0.0620144	0.13881	-0.317871	-0.126366	-0.687347	-0.447388	-0.360682
HUXP1124B12	NME1	non-metastatic cells 1, protein (NM23A) expressed in	NM_001018139	4830	14	1	0.00282604	0.201141	0.10156	0.0696101	0.056378	0.0245914	0.0107582	0.0680115	0.0433488	0.0598688	0.157675	0.162672	-0.0648711	-0.0879143	-0.148156	-0.387695	-0.471414	-0.447707	-0.425502	-0.334396	-0.702893	-0.489572	-0.655768
HUXP1075A07	SLC25A3	solute carrier family 25 (mitochondrial carrier; phosphate carrier), member 3	NM_002635	5250	14	1	-0.0615203	0.127618	0.0306596	0.0302861	-0.0146783	-0.061917	-0.022978	0.0251451	0.0104213	-0.0867951	0.0859139	0.0197611	-0.0744224	-0.23688	-0.0979257	-0.303974	-0.240797	-0.184196	-0.361701	-0.308002	-0.593688	-0.320097	-0.216348
HUXP1071B08	PPIA	peptidylprolyl isomerase A (cyclophilin A)	NM_203431	5478	14	1	-0.041155	0.146482	0.225093	0.00135993	0.116722	0.0890512	0.0121229	0.257059	0.219557	0.0594936	0.082203	0.157889	-0.04708	-0.223119	-0.0746605	-0.45244	-0.100213	-0.156784	-0.287713	-0.23446	-0.547156	-0.358261	-0.30651
HUXP1177F07	PTPN2	protein tyrosine phosphatase, non-receptor type 2	NM_080423	5771	14	1	0.126757	-0.112475	-0.1105	NaN	-0.0949484	0.160465	-0.114742	0.321928	0.196397	-0.149576	-0.0986843	0.177396	-0.273018	-0.268935	-0.188662	-0.426009	NaN	NaN	-0.321928	-0.5025	NaN	-0.356144	-0.281771
HUXP1129D04	RGL2	ral guanine nucleotide dissociation stimulator-like 2	NM_004761	5863	14	1	-0.296393	-0.0103163	0.0287932	0.106235	0.0264479	0.0509614	0.134599	0.0636833	0.188541	0.265894	-0.24223	0.337843	-0.216064	-1.06567	0.0112523	-0.292224	-0.416474	-0.318431	-0.288409	-0.140921	-0.564003	-0.452127	-0.283297
HUXP1168A11	RAC1	ras-related C3 botulinum toxin substrate 1 (rho family, small GTP binding protein Rac1)	NM_006908	5879	14	1	0.0118151	0.108321	0.100109	0.0111951	0.0083964	0.100031	-0.0267727	0.13776	0.000250533	0.0205173	-0.0306328	-0.0440281	-0.0511012	-0.316493	-0.254145	-0.263432	-0.254038	-0.169659	-0.220101	-0.243756	-0.495973	-0.406785	-0.310902
SHR020061026D12	RBM3	RNA binding motif (RNP1, RRM) protein 3	Hs.301404	5935	14	1	-0.0152981	0.33468	0.0243078	0.00668478	0.306169	0.338578	0.332698	0.385367	0.473119	0.424195	0.253163	0.336841	0.00645232	-0.30619	-0.388432	-0.572766	-0.2113	-0.493461	-0.219265	-0.454407	-0.698501	-0.834576	-0.600722
HUXP1075A12	RPL4	ribosomal protein L4	NM_000968	6124	14	1	0.0161642	0.0181988	0.171384	-0.0349499	0.113493	0.140923	0.0540104	0.174155	0.0991193	-0.0413349	0.00533265	0.169722	-0.0892617	-0.226421	0.00313483	-0.296969	-0.187745	-0.174297	-0.184353	-0.163232	-0.624697	-0.287094	-0.196681
HUXP1074D06	RPL11	ribosomal protein L11	NM_000975	6135	14	1	-0.0134051	0.0776953	0.015559	-0.0931868	-0.0809332	0.0169491	-0.00407165	0.149856	0.0847865	-0.0281532	0.0545996	0.205796	-0.0212382	-0.120371	-0.00893625	-0.270895	-0.120937	-0.194083	-0.20605	-0.316688	-0.682397	-0.468268	-0.115601
HUXP1074C08	RPL19	ribosomal protein L19	NM_000981	6143	14	1	-0.0784896	0.037612	0.144208	-0.0591281	-0.0977198	-0.052074	0.12223	-0.0887846	-0.00357001	0.022402	-0.0381548	0.252251	-0.0120349	-0.0462556	0.0118639	-0.182393	-0.100534	0.0687955	-0.182481	-0.18864	-0.572187	-0.536552	-0.228751
HUXP1119A01	RPLP0	ribosomal protein, large, P0	AK001313	6175	14	1	-0.163159	0.237115	0.167093	0.0744169	-0.0865681	0.000383892	-0.0243771	0.177976	0.105051	-0.0387046	-0.114906	0.292163	-0.0249241	-0.509708	0.127754	-0.214609	-0.0062783	-0.104353	-0.29715	-0.199277	-0.810841	-0.894276	-0.405578
HUXP1112C02	RPS3	ribosomal protein S3	NM_001005	6188	14	1	0.0534643	0.0307964	0.191983	0.125964	0.108416	0.112685	-0.00541434	0.119456	0.0133502	0.151677	-0.0285614	0.0409297	-0.0101614	-0.314485	0.0455172	-0.197935	-0.15021	-0.142133	-0.28181	-0.203075	-0.576764	-0.34743	-0.356144
HUXP1074G05	RPS12	ribosomal protein S12	NM_001016	6206	14	1	-0.0977987	-0.107822	-0.199294	-0.13456	0.0911293	-0.154871	-0.0430664	0.166242	0.124053	-0.0220959	0.0547822	0.210564	-0.0214319	-0.153909	0.00427028	-0.286033	-0.153796	-0.295405	-0.337443	-0.503009	-0.797471	-0.842697	-0.174011
HUXP1198D02	RPS21	ribosomal protein S21	NM_001024	6227	14	1	-0.000424343	0.103375	0.0909564	-0.18024	0.0507163	0.00724342	-0.0304614	-0.00512503	0.0933893	-0.104035	-0.143555	0.212553	-0.106025	-0.0924519	0.0149739	-0.253354	-0.21641	-0.238009	-0.272736	-0.18132	-0.83388	-0.600397	-0.244168
HUXP1054F09	MAP2K4	mitogen-activated protein kinase kinase 4	NM_003010	6416	14	1	-0.0256359	0.107752	0.0181727	0.0886356	-0.0688457	-0.0626765	-0.0450239	-0.0122783	-0.119971	-0.0462937	0.0451422	0.176362	-0.0421491	-0.187022	0.037769	-0.241501	0.0659268	-0.247359	-0.0488609	-0.215927	-0.656124	-0.603786	-0.260012
HUXP1129C05	SNRPF	small nuclear ribonucleoprotein polypeptide F	NM_003095	6636	14	1	-0.130922	-0.0146294	-0.0186891	0.0946881	-0.11967	-0.05551	-0.0506503	0.0685378	0.100661	0.0462153	0.00589351	-0.00888727	-0.14593	-0.208904	-0.104165	-0.446168	-0.29811	-0.187078	-0.330066	-0.37089	-0.689758	-0.643901	-0.0635891
HUXP1043E09	PTP4A1	protein tyrosine phosphatase type IVA, member 1	NM_003463	7803	14	1	-0.242857	0.0937821	0.0120728	-0.170801	0.126957	0.317858	0.197146	0.337035	0.216181	0.0550414	0.0759489	0.159941	-0.177413	-0.396243	-0.349889	-0.55698	-0.254929	-0.2935	-0.254505	-0.250611	-0.640845	-0.449307	-0.00904514
HUXP1167E04	CUL1	cullin 1	NM_003592	8454	14	1	0.0059739	0.0721949	0.140225	0.157952	-0.112964	0.0354693	0.141432	0.0231848	0.0515961	-0.0868522	0.0379679	-0.038161	-0.179625	-0.0331125	0.0390037	-0.022631	-0.111791	-0.176779	-0.411291	-0.16777	-0.328949	-0.348881	-0.358236
HUXP1061H07	PEA15	phosphoprotein enriched in astrocytes 15	NM_003768	8682	14	1	-0.125531	0.371759	0.0556021	0.0846722	0	-0.0100537	0.00353169	0.124328	0.355153	0.345843	0.0317089	0.217963	-0.12043	-0.323392	0.0559846	-0.0276563	0.216318	-0.210838	-0.188969	-0.302232	-0.88168	-0.761213	-0.849508
HUXP1207E11	CTNNAL1	catenin (cadherin-associated protein), alpha-like 1	NM_003798	8727	14	1	-0.119527	0.0214054	-0.00430014	-0.0824622	-0.0428718	0.023459	-0.0685932	-0.0654738	0.0360693	-0.0192362	-0.0130562	0.0865258	-0.116814	-0.116305	0.0474029	-0.187386	-0.275634	-0.0850815	-0.514862	-0.40184	-0.635304	-0.573558	-0.421016
HUXP1088C08	TSC22D1	TSC22 domain family, member 1	NM_006022	8848	14	1	0.124328	0.117184	-0.00384207	0.156119	0.0531113	0.222392	0.0781947	0.223277	0.213779	-0.135117	-0.0752192	0.066769	0.0632862	-0.60003	-0.22741	-0.59655	-0.224873	NaN	-0.667425	-0.445311	-0.771299	-0.639206	-0.435839
HUXP1125E03	GTF3C4	general transcription factor IIIC, polypeptide 4, 90kDa	NM_012204	9329	14	1	-0.0739754	-0.0706078	0.0159354	0.0322956	0.0273674	-0.0664888	-0.0211135	-0.0436214	-0.0182822	0.00395218	-0.109979	0.0887442	-0.0947696	-0.240679	-0.0864487	-0.173529	-0.151877	-0.212464	-0.279678	-0.213669	-0.646103	-0.173581	-0.202449
HUXP1006C11	HAND2	heart and neural crest derivatives expressed 2	NM_021973	9464	14	1	-0.109764	-0.0806185	0.229233	0	-0.0604646	0.220266	-0.115189	-0.0906025	0.283793	0.0232698	-0.0523315	0.279778	-0.144853	-0.4239	-0.285672	-0.507847	-0.374396	0.252119	-0.446148	-0.164038	-0.735773	-0.699069	-0.433757
HUXP1057H12	PRDX6	peroxiredoxin 6	NM_004905	9588	14	1	-0.165296	0.0453386	0.0309261	0.090099	-0.0504547	-0.0591621	-0.114344	-0.130223	-0.0863469	-0.0372329	0.0544	0.260123	-0.055457	-0.264776	-0.180451	-0.338525	-0.170553	-0.431136	-0.301423	-0.373779	-0.695103	-0.562123	-0.355259
HUXP1122H08	BZW1	basic leucine zipper and W2 domains 1	NM_014670	9689	14	1	-0.20173	0.271423	-0.00664225	0.00274225	0.109948	-0.024839	-0.0298259	0.00919894	0.112567	-0.0526469	0.0225561	-0.0129487	-0.165794	-0.164992	-0.0834804	-0.391495	-0.0916129	-0.31732	-0.300544	-0.285163	-0.593786	-0.671488	-0.191081
HUXP1002G11	TLK1	tousled-like kinase 1	NM_012290	9874	14	1	-0.323838	0.0937821	0.133583	-0.0805434	0.0256866	-0.044623	0.0685088	-0.0767572	0.168877	0.399607	-0.0909085	0.0321326	-0.0392061	-0.19785	-0.0888093	-0.355215	-0.0179964	-0.119909	-0.259151	-0.197939	-0.715904	-0.489656	-0.576501
SHR020061018F10	ZNF263	zinc finger protein 263	NM_005741	10127	14	1	-0.0919225	-0.171078	-0.035877	-0.0758314	-0.208108	-0.13516	0.13236	0.044623	0.255655	0.104211	-0.0840643	0.00441867	0.109624	-0.135883	-0.0302463	-0.0710498	-0.212153	-0.508612	-0.369757	-0.355228	-0.577658	-0.219313	-0.501353
HUXP1074G12	SAP18	Sin3A-associated protein, 18kDa	NM_005870	10284	14	1	-0.0694147	0.0952348	0.105616	0.0275982	-0.0168026	0.037142	-0.000788466	0.202266	0.0610137	0.0087909	0.0393934	-0.00974855	-0.112074	-0.339424	-0.172323	-0.281852	-0.202365	-0.316608	-0.266087	-0.199423	-0.581108	-0.428634	-0.232757
HUXP1163E08	GNB2L1	guanine nucleotide binding protein (G protein), beta polypeptide 2-like 1	NM_006098	10399	14	1	0.0529887	0.105216	0.217579	0.00796683	0.0927304	0.0203923	0.0387275	0.0746507	0.0376859	0.0216661	0.0157462	0.0504462	-0.0534393	-0.174805	-0.015774	-0.18668	-0.124446	-0.119522	-0.224257	-0.185245	-0.488294	-0.18704	-0.384824
HUXP1044B06	PGRMC1	progesterone receptor membrane component 1	NM_006667	10857	14	1	-0.24664	0.204221	0.0718702	-0.0971535	0.00550648	-0.0430045	-0.0737641	-0.0330824	-0.152875	0.00495772	0.0500986	0.190222	0.0710008	-0.14511	-0.00621852	-0.217466	0.0303736	-0.179025	-0.197258	-0.0836579	-0.833165	-0.650551	-0.174241
HUXP1112D04	COPS8	COP9 constitutive photomorphogenic homolog subunit 8 (Arabidopsis)	NM_006710	10920	14	1	-0.0879552	0.122633	0.109338	0.0524674	-0.074087	-0.0236029	-0.0275413	-0.0757739	-0.0487637	0.00285965	0.0404994	0.101516	-0.0299947	-0.271035	-0.134301	-0.334419	-0.299132	-0.323008	-0.334419	-0.212167	-0.46956	-0.287802	-0.322463
HUXP1038D01	XAB1	XPA binding protein 1, GTPase	NM_007266	11321	14	1	-0.0134832	0.0855181	0.163942	-0.132946	0.0694479	0.117695	0.0272215	0.115864	-0.0391384	0.0614005	-0.14099	0.269076	-0.0215332	-0.129283	-0.0125726	-0.121769	-0.142958	-0.241008	-0.139906	-0.0706047	-0.468318	-0.413851	-0.293233
HUXP1067A03	ARHGAP26	Rho GTPase activating protein 26	NM_015071	23092	14	1	-0.0433802	0.0606058	0.138823	0.0393002	0.0684251	0.0427949	-0.00518024	0.0715048	-0.0116561	-0.120266	-0.0490665	0.0402784	-0.0327025	-0.294213	-0.0426126	-0.145825	-0.0431566	-0.0721097	-0.0657878	-0.182478	-0.537269	-0.465073	-0.398904
HUXP1126A02	MESDC2	mesoderm development candidate 2	D42039	23184	14	1	-0.210897	0.193395	-0.00345556	-0.142675	-0.0766213	-0.0614005	-0.0474614	0.0466262	-0.0766928	0.0119726	0.228477	0.245307	-0.0536047	-0.204889	-0.0443941	-0.353972	-0.0428131	-0.257158	-0.126264	-0.337358	-0.634914	-0.672638	-0.497906
HUXP1069E06	ITGB3BP	integrin beta 3 binding protein (beta3-endonexin)	NM_014288	23421	14	1	-0.0181931	-0.0244827	0.0354597	-0.0371906	0.152952	-0.0310269	-0.0621217	0.160854	-0.0262315	0.0760289	-0.0568459	0.099334	0.0603726	-0.265382	-0.0104924	-0.0749981	-0.074547	-0.292181	-0.0916998	-0.112579	-0.45209	-0.439461	-0.362221
HUXP1119H06	GNL3	guanine nucleotide binding protein-like 3 (nucleolar)	NM_206826	26354	14	1	-0.0141343	-0.0118761	0.0712356	-0.00432536	-0.0744209	-0.0737195	0.0369578	0.0107798	-0.0539633	-0.0493793	-0.0967933	0.259973	-0.0909548	-0.360115	-0.0983268	-0.265772	-0.219005	-0.287635	-0.254237	-0.218355	-0.747164	-0.767235	-0.249302
HUXP1060A06	PDCD4	programmed cell death 4 (neoplastic transformation inhibitor)	AK025724	27250	14	1	-0.156035	0.00156992	0.049286	-0.214231	-0.0675839	-0.0490768	-0.135916	0.322247	0.0694531	0.0788714	-0.32527	0.30711	-0.234227	-0.22782	-0.0599976	-0.208808	-0.194484	0.0589975	-0.186457	-0.00662928	-0.614344	-0.374674	-0.185153
HUXP1011H12	C1orf121	chromosome 1 open reading frame 121	NM_016076	51029	14	1	-0.173868	0.0157673	0.137045	-0.0614005	0.0591958	0.0740006	0.088387	0.271569	0.00702043	0.247521	0.241438	0.144995	-0.0544478	-0.0707528	-0.142019	-0.142512	-0.145717	-0.145541	-0.18714	0.0412227	-0.584963	-0.163499	-0.374026
HUXP1041H12	TRAPPC4	trafficking protein particle complex 4	NM_016146	51399	14	1	-0.100577	-0.00942941	0.152003	-0.0816953	-0.047618	0.0352285	0.0791922	0.153868	0.0687908	0.136285	-0.210168	0.128324	-0.270891	-0.310701	-0.371559	-0.333051	-0.486315	-0.0198085	-0.261125	-0.165424	-0.728179	-0.561655	-0.322502
HUXP1126E05	TH1L	TH1-like (Drosophila)	NM_198976	51497	14	1	-0.140774	0.0696378	0.129216	0.120294	-0.0421108	0.0184569	0.065699	0.141111	0.124017	0.162036	0.0696097	-0.130572	-0.187424	-0.255723	-0.0444661	-0.253073	-0.329593	-0.418349	-0.274112	-0.295844	-0.422271	-0.166851	-0.448068
HUXP1055D08	PCF11	PCF11, cleavage and polyadenylation factor subunit, homolog (S. cerevisiae)	NM_015885	51585	14	1	-0.0951572	0.140917	-0.0641303	-0.104887	-0.095759	-0.108934	-0.046921	0.290296	-0.198904	-0.0521513	0.0719498	0.0242475	-0.156005	-0.418436	0.0291463	-0.115477	0.1127	-0.177643	-0.0508812	-0.172702	-0.467949	-0.734655	-0.402371
HUXP1002F07	PCBP3	poly(rC) binding protein 3	NM_020528	54039	14	1	-0.161463	-0.0106682	-0.0129197	-0.065392	-0.0324671	-0.148662	-0.0965835	0.195227	0.20061	0.199018	0.0607358	0.0918959	-0.154374	-0.145626	-0.169085	-0.281664	-0.225317	0.0100537	-0.274953	-0.255521	-0.567889	-0.366782	-0.360176
HUXP1072G04	ING3	inhibitor of growth family, member 3	NM_198267	54556	14	1	-0.0879477	0.192365	-0.300124	-0.389947	-0.0573332	0.228441	0.434628	0.323245	0.405992	0.432315	0.146592	-0.0408723	-0.00309924	-0.334154	-0.137504	-0.190462	-0.196397	0.023459	-0.336049	-0.488101	-0.469485	-0.549339	-0.407376
HUXP1018F10	ZNF562	zinc finger protein 562	NM_017656	54811	14	1	0.0649382	0.0465614	0.152908	-0.0172627	0.0708745	-0.0280735	0.0515006	0.0152202	-0.0150384	0.0284765	0.045775	0.0703227	0.0680536	-0.180424	-0.0723967	-0.177317	-0.363299	-0.387858	-0.238791	-0.198902	-0.56171	-0.339282	-0.333569
HUXP1055D03	TBC1D2	TBC1 domain family, member 2	NM_018421	55357	14	1	-0.199644	-0.0449875	0.196233	0.0194034	-0.143404	-0.0356854	-0.159009	0.234157	-0.0154945	-0.0760244	-0.196987	0.185819	-0.134208	-0.263328	-0.0944479	-0.162479	-0.14784	-0.130787	-0.0998099	-0.158349	-0.753569	-0.738269	-0.368653
HUXP1040E06	C11orf30	chromosome 11 open reading frame 30	NM_020193	56946	14	1	0	0.251719	-0.067323	-0.134855	-0.0855757	0.107915	-0.112059	-0.0673993	-0.0588937	0.0351894	0.0515303	0.0985638	-0.0271848	-0.218001	-0.00879695	-0.0473057	0.128324	-0.182377	-0.0903465	-0.422233	-0.607993	-0.624133	-0.410685
HUXP1055G07	DIP2B	DIP2 disco-interacting protein 2 homolog B (Drosophila)	NM_173602	57609	14	1	-0.170933	0.00564656	0.0200656	0.00437844	0.0137401	0.0544478	-0.00968255	-0.0358007	-0.19773	0.166192	0.03012	0.131245	-0.148214	-0.528978	-0.0937821	-0.253341	-0.0764521	-0.0276563	-0.0437951	-0.157044	-0.460097	-0.548521	-0.379058
HUXP1040A05	TFB2M	transcription factor B2, mitochondrial	NM_022366	64216	14	1	-0.114617	0.196421	0.0510527	-0.0972972	0.0494933	0.21839	0.116814	0.0897725	0.0214443	0.0788554	0.149172	0.111235	-0.196375	-0.120854	-0.229743	-0.493744	-0.334721	-0.330473	-0.163812	-0.122484	-0.417068	-0.680346	-0.243961
HUXP1024A08	ANKRD57	ankyrin repeat domain 57	NM_023016	65124	14	1	0.0845335	0.0901352	0.0433675	-0.0309603	0.269047	-0.0191088	-0.0473921	0.0363215	-0.00628626	0.0160599	0.179957	-0.110054	0.0742938	0.16601	0.0386028	-0.195551	-0.182864	-0.638074	-0.385099	-0.516962	-0.484162	-0.664962	-0.148214
HUXP1062F08	BAALC	brain and acute leukemia, cytoplasmic	NM_001024372	79870	14	1	-0.0689075	0.0773818	0.38404	0.143909	-0.0386297	-0.106695	-0.154723	0.21029	-0.0295342	-0.0204977	0.0533767	0.49691	-0.0430045	-0.0365259	0.201252	-0.0132619	0.328017	0.110742	0.0778319	0.532448	-0.806138	-0.724852	-0.213185
HUXP1165D03	DKFZP564O0523	hypothetical protein DKFZp564O0523	NM_032120	84060	14	1	-0.30117	0.153065	0.157064	0	0.0443941	0.0848889	-0.158366	0.295198	-0.159996	0.0318841	-0.0583642	0.0592392	0.119582	-0.161751	-0.113009	0.118105	-0.172061	-0.504231	-0.23043	-0.149514	-0.619609	-0.570535	-0.364489
HUXP1184E12	ING5	inhibitor of growth family, member 5	NM_032329	84289	14	1	NaN	0.0845335	0.240398	0.252981	-0.148863	0.114171	0.133109	0.368151	0.257496	0	-0.153474	NaN	-0.296718	-0.0160301	-0.0242475	-0.0799683	NaN	NaN	0.00723157	-0.165424	-0.478463	-0.541894	-0.499571
HUXP1049B08	UBTD2	ubiquitin domain containing 2	Hs.179852	92181	14	1	-0.0360693	0.0391706	-0.0411573	0.0606959	0.1676	0.337035	0.157541	-0.113657	-0.118644	0.286713	-0.0422282	0.124987	-0.224815	-0.567229	0.0476967	-0.207442	0.238787	0.0593785	-0.272685	-0.176878	-0.453366	-0.452512	-0.437532
HUXP1187B03	C6orf51	chromosome 6 open reading frame 51	NM_138408	112495	14	1	0.0382314	0.300438	0.236067	0.103596	0.0592197	0.159478	0.0876036	0.121771	0.245547	0.213848	0.380612	0.173332	0.363908	-0.176122	-0.15834	-0.382301	-0.429096	-0.362048	-0.219994	-0.124116	-0.412788	-0.680851	-0.27713
HUXP1024A04	OSBPL11	oxysterol binding protein-like 11	NM_022776	114885	14	1	-0.045443	0.123428	0.0560759	-0.0122783	-0.233409	-0.0103419	0.0461896	0.398549	0.157952	-0.138898	-0.0706047	-0.00946033	0.0571439	0.0534393	0.230298	0	0.0962153	0.122619	0.00464636	-0.0703893	-0.397335	-0.839892	-0.548699
HUXP1010D08	ALCAM	activated leukocyte cell adhesion molecule	Y10183	214	21	1	-0.245112	0.122683	0.114093	-0.163499	-0.36257	-0.13493	-0.128544	-0.137504	-0.13065	-0.308549	-0.207233	-0.415037	-0.55881	-0.530515	NaN	-1.15472	-0.884523	-0.824633	-0.810572	-0.635236	-0.492769	-0.678072	-0.370956
HUXP1071H04	AMD1	adenosylmethionine decarboxylase 1	NM_001634	262	21	1	-0.197165	-0.15426	-0.230982	-0.299066	-0.0522166	-0.037918	-0.00829402	-0.0343515	-0.0989915	-0.252891	-0.226452	-0.405476	-0.641546	-0.702764	-0.592067	-0.876793	-0.655119	-0.544912	-0.410066	-0.2908	-0.381107	-0.525581	-0.355088
HUXP1141H08	APOA2	apolipoprotein A-II	NM_001643	336	21	1	-0.0834745	-0.0877855	-0.00947586	-0.410876	0.0622843	-0.161496	-0.0525357	0.200299	-0.425061	-0.344583	-0.517276	-0.517924	-0.446608	-0.252236	-0.61753	-0.83715	-0.650644	-0.69776	-0.512496	-0.682971	NaN	-0.588253	-0.60514
HUXP1178F08	ARG1	arginase, liver	Hs.440934	383	21	1	-0.122133	-0.156993	-0.177705	-0.220909	-0.0986571	-0.0817724	-0.180512	-0.168155	0.0176023	0.0880453	0.215873	-0.0108986	-0.348742	-0.44045	-0.542616	-0.584963	-0.855367	-0.796804	-0.67291	-0.589129	-0.806637	-0.689998	-0.423068
HUXP1186G04	BRAF	v-raf murine sarcoma viral oncogene homolog B1	NM_004333	673	21	1	-0.172837	-0.138791	-0.283582	-0.513042	-0.263713	-0.215563	-0.147845	-0.168953	-0.230093	-0.210218	-0.133502	-0.326745	-0.605047	-0.841655	-0.753	-0.826768	-0.905052	-0.507862	-0.501419	-0.342446	-0.410208	-0.356485	-0.27474
HUXP1141G09	C1S	complement component 1, s subcomponent	NM_001734	716	21	1	-0.165866	-0.240837	-0.182619	-0.27516	-0.166958	-0.190006	-0.281567	-0.011138	-0.163367	-0.240028	-0.367933	-0.192062	-0.443053	-0.367579	-0.433145	-0.555876	-0.567087	-0.521584	-0.476314	-0.389677	-0.593841	-0.499585	-0.357976
HUXP1186E12	CD47	CD47 molecule	BG540916	961	21	1	-0.172269	-0.073249	-0.343542	-0.576029	-0.207126	-0.0799683	-0.0776321	-0.0884688	-0.0240856	-0.100111	-0.0312187	-0.231646	-0.522678	-0.822946	-0.639627	-0.791171	-1.06413	-0.472882	-0.35811	-0.262273	-0.47856	-0.428299	-0.190301
HUXP1106D10	CDC42	cell division cycle 42 (GTP binding protein, 25kDa)	NM_044472	998	21	1	-0.157101	-0.159478	-0.251979	-0.455452	-0.283393	NaN	-0.306103	-0.366428	-0.0901978	-0.121562	-0.164631	-0.0630098	-0.448146	-0.326923	-0.580097	-0.831024	-0.548437	NaN	-0.437405	-0.649093	-0.607158	-0.281771	-0.235216
SHR020061026G02	COX11	COX11 homolog, cytochrome c oxidase assembly protein (yeast)	NM_004375	1353	21	1	-0.160465	-0.146813	-0.181674	-0.139283	-0.107965	-0.106915	-0.0901978	-0.192048	-0.0512037	-0.0985282	-0.238363	-0.060121	-0.394731	-0.489665	-0.384547	-0.641749	-0.518338	-0.485082	-0.527194	-0.446573	-0.676461	-0.621488	-0.356582
HUXP1011E03	DUT	dUTP pyrophosphatase	NM_001948	1854	21	1	-0.0169134	0.0372596	-0.112416	-0.070341	-0.245296	-0.0911753	-0.135523	0.0305344	-0.103378	-0.0855757	-0.2066	0.0141096	-0.397335	-0.645018	-0.692457	-0.673826	-0.649261	-0.59655	-0.649755	-0.574167	-0.81212	-0.463656	-0.598333
HUXP1102C08	FASN	fatty acid synthase	NM_004104	2194	21	1	0.0123749	0.0755596	-0.218042	-0.162951	0.180064	-0.0788448	-0.0947565	-0.0138455	-0.172545	-0.265875	-0.305793	-0.577959	-0.58601	-0.901205	-0.821488	-0.852563	-1.0977	-0.903512	-0.784755	-0.516111	-0.84966	-0.701128	-0.598507
SHR020060006C03	FXN	frataxin	NM_181425	2395	21	1	-0.352106	-0.0635251	0.049076	-0.0712587	-0.161851	-0.209096	-0.176323	-0.190606	0.0339473	0.0906983	-0.00666373	-0.0907655	-0.265492	-0.369375	-0.389808	-0.628309	-0.925999	-0.756443	-0.487794	-0.440216	-0.440861	-0.380031	-0.33687
HUXP1075A08	GBAS	glioblastoma amplified sequence	NM_001483	2631	21	1	-0.250962	-0.0545101	-0.137982	-0.295918	-0.219781	-0.159123	-0.104815	0.0888093	0.0435564	-0.16693	-0.246696	-0.107756	-0.338912	-0.549944	-0.463543	-0.575449	-0.613182	-0.498716	-0.351612	-0.267284	-0.618693	-0.697073	-0.400605
SHR020061012D04	GCSH	glycine cleavage system protein H (aminomethyl carrier)	NM_004483	2653	21	1	-0.0907496	-0.0536673	-0.182882	-0.223651	-0.137822	-0.0937917	-0.158071	-0.198152	-0.011504	-0.0571439	-0.0351282	-0.0677821	-0.233211	-0.501692	-0.491776	-0.699581	-0.712392	-0.669425	-0.573145	-0.363143	-0.635355	-0.512464	-0.265413
HUXP1170E02	HOXA10	homeobox A10	CR606804	3206	21	1	-0.42553	-0.299066	-0.17166	-0.260905	-0.235771	-0.0836579	-0.050449	0.141305	-0.158698	-0.180572	-0.357552	-0.557271	-0.719701	-0.845554	-0.911869	-0.68966	-0.842261	-0.852704	-0.431116	-0.450065	-0.568843	-0.385493	-0.527542
SHR020061034B09	IRF7	interferon regulatory factor 7	NM_004031	3665	21	1	-0.172061	0.0124193	-0.481127	-0.256014	0.119053	-0.234905	-0.119389	-0.273018	NaN	NaN	-0.00808235	-0.277985	-0.426417	-0.160177	-0.654225	-0.849175	-0.526546	NaN	-0.608702	-0.590609	-0.727234	NaN	-0.225881
SHR020060008B02	MNT	MAX binding protein	NM_020310	4335	21	1	-0.182286	0.0663425	-0.217963	-0.472589	-0.143492	-0.1342	-0.0323655	-0.02284	-0.181607	-0.316027	-0.348239	-0.218924	-0.334266	-0.446006	-0.532321	-0.553114	-0.593	-0.602996	-0.51506	-0.473124	-0.868035	-0.559427	-0.38051
HUXP1119H07	MTHFD1	methylenetetrahydrofolate dehydrogenase (NADP+ dependent) 1, methenyltetrahydrofolate cyclohydrolase, formyltetrahydrofolate synthetase	NM_005956	4522	21	1	-0.164607	-0.0612851	-0.0186157	0.125248	-0.103545	-0.135312	-0.080251	-0.301909	-0.215999	-0.0875154	-0.193241	-0.0868996	-0.230582	-0.709088	-0.442767	-0.682492	-0.721937	-0.610709	-0.550846	-0.273552	-0.502268	-0.453273	-0.478398
HUXP1129B08	NDUFB1	NADH dehydrogenase (ubiquinone) 1 beta subcomplex, 1, 7kDa	NM_004545	4707	21	1	-0.172181	-0.160101	-0.185446	-0.105043	-0.0803831	-0.219612	-0.13139	-0.116585	-0.198546	-0.301334	-0.263754	-0.225224	-0.533315	-0.806349	-0.485833	-0.662419	-0.654311	-0.556011	-0.509713	-0.513013	-0.732716	-0.483914	-0.445411
HUXP1063G07	NDUFC1	NADH dehydrogenase (ubiquinone) 1, subcomplex unknown, 1, 6kDa	NM_002494	4717	21	1	-0.328224	-0.219518	-0.196006	-0.294564	-0.226899	-0.19089	-0.23077	-0.162974	-0.300305	-0.152752	-0.353843	-0.0767854	-0.451786	-0.605294	-0.59394	-0.50858	-0.658049	-0.510898	-0.444641	-0.52289	-0.60921	-0.489292	-0.464225
SHR020060017E02	PFAS	phosphoribosylformylglycinamidine synthase (FGAR amidotransferase)	NM_012393	5198	21	1	-0.220645	-0.224607	-0.0842901	-0.0168083	-0.162004	-0.188762	-0.241008	-0.500429	-0.0273073	-0.29956	-0.196247	-0.277985	-0.384918	-0.600069	-0.560633	-0.712467	-1.2935	-0.701156	-0.591154	-0.440339	-0.790341	-0.523562	-0.611212
HUXP1043B06	PGM1	phosphoglucomutase 1	NM_002633	5236	21	1	-0.125531	-0.223769	-0.120952	-0.0863819	-0.0575875	-0.136948	-0.101321	-0.164973	-0.120456	-0.0232554	-0.300139	-0.147442	-0.442358	-0.78501	-0.474972	-0.715082	-0.638292	0.0236236	-0.488797	-0.193048	-0.531594	-0.470142	-0.542251
SHR020061014E03	PON2	paraoxonase 2	NM_000305	5445	21	1	-0.326501	-0.163058	-0.0284084	-0.194269	-0.31946	-0.178113	-0.00604904	-0.125531	-0.0144271	-0.234221	-0.096602	-0.0787771	-0.733583	-0.50922	-0.453605	-0.668094	-0.623755	-0.417276	-0.3349	0.0791702	-0.411069	-0.460883	-0.413839
HUXP1064H07	TWF1	twinfilin, actin-binding protein, homolog 1 (Drosophila)	NM_198974	5756	21	1	-0.372554	0.166334	-0.0569184	-0.303069	-0.30117	-0.2205	-0.0824622	0.226366	0.0830557	-0.192645	-0.43105	-0.446608	-0.550611	-0.54773	-0.375509	-0.614507	-0.31034	-0.666757	-0.384143	-0.588629	-0.550552	-0.511305	-0.446953
SHR020061026D07	PTMA	prothymosin, alpha (gene sequence 28)	NM_002823	5757	21	1	-0.280054	0.321367	-0.154032	0.102202	-0.119708	-0.242819	-0.033982	-0.144391	-0.241555	-0.155645	-0.0653339	-0.191517	0.0277017	-0.19453	-0.584885	-0.819998	-1.0107	-0.952446	-0.424151	-0.761142	-1.0757	-0.336632	0.230938
HUXP1011E07	RALA	v-ral simian leukemia viral oncogene homolog A (ras related)	NM_005402	5898	21	1	-0.0949965	0.00600707	0.0325545	-0.120294	0.0336308	-0.0953479	-0.0652177	-0.146841	-0.0943274	-0.0110552	-0.0978473	-0.0662917	-0.507907	-0.922463	-0.491853	-0.643638	-0.375867	-0.431235	-0.454902	-0.309227	-0.969626	-0.565334	-0.572394
HUXP1162C09	RPL15	ribosomal protein L15	NM_002948	6138	21	1	-0.31946	-0.0497406	-0.217056	-0.318682	0.00860286	-0.51339	0.129524	-0.187378	0.128918	0.0762775	-0.0904437	0.100554	-0.546363	-0.698619	-0.653798	-0.617861	-0.600393	-0.63462	-0.439285	-0.274699	-0.26632	-0.412927	-0.291219
HUXP1112G05	RPL23A	ribosomal protein L23a	NM_000984	6147	21	1	-0.277124	-0.198849	-0.20319	-0.253435	-0.180003	-0.105314	-0.251386	-0.150788	-0.263108	-0.230969	-0.302856	-0.0752036	-0.474452	-0.678982	-0.39501	-0.700218	-0.524884	-0.542155	-0.561405	-0.409823	-0.823879	-0.661191	-0.366942
HUXP1076D11	RPL35A	ribosomal protein L35a	NM_000996	6165	21	1	-0.1192	-0.222424	-0.0199446	-0.143248	-0.134373	-0.119861	-0.214037	-0.0135399	-0.14868	-0.139157	-0.306244	-0.241399	-0.274327	-0.614702	-0.319886	-0.505899	-0.414223	-0.41697	-0.552719	-0.470759	-0.642604	-0.406375	-0.494792
HUXP1163E03	RPS26	ribosomal protein S26	NM_001029	6231	21	1	-0.103599	0.00418476	0.137817	-0.0353463	0.0463014	0.0179299	-0.0799748	0.0854199	0.0955815	-0.127418	-0.209092	-0.372953	-0.419162	-0.73151	-0.647127	-0.87404	-0.778052	-0.66705	-0.699799	-0.485303	-0.758101	-0.585391	-0.235185
HUXP1029E07	SET	SET translocation (myeloid leukemia-associated)	NM_003011	6418	21	1	-0.101551	0.0745935	-0.177591	-0.108602	-0.163574	0.0396543	-0.0340299	0.00200793	0.131989	0.00734059	0.0641541	0.0951313	-0.249787	-0.640257	-0.541917	-0.749283	-0.573568	-0.606205	-0.427842	-0.377774	-0.709018	-0.557177	-0.207081
SHR020061026F05	SLC6A8	solute carrier family 6 (neurotransmitter transporter, creatine), member 8	NM_005629	6535	21	1	-0.242091	-0.237636	-0.200913	-0.202094	-0.194752	-0.209838	-0.25455	-0.142077	-0.114171	-0.0911871	-0.166046	-0.0962153	-0.396432	-0.655208	-0.748831	-0.765229	-0.739209	-0.733645	-0.683449	-0.614449	-0.838134	-0.636252	-0.424753
HUXP1012C02	SP100	SP100 nuclear antigen	AF076675	6672	21	1	-0.100641	-0.0157754	-0.0428153	-0.116117	-0.101852	-0.0325666	-0.0903323	0.0426137	-0.0997173	-0.0165538	-0.12208	-0.209505	-0.351532	-0.666822	-0.52715	-0.782482	-0.6903	-0.634225	-0.521547	-0.438406	-0.636152	-0.615188	-0.256663
HUXP1077B07	TROVE2	TROVE domain family, member 2	NM_004600	6738	21	1	-0.128939	-0.163955	-0.236298	-0.25069	-0.270648	-0.156061	-0.14355	-0.115906	-0.232477	-0.225702	-0.239303	-0.408216	-0.484428	-0.705487	-0.568577	-0.722697	-0.514573	-0.455082	-0.396729	-0.224754	-0.382954	-0.455004	-0.206822
SHR020060005G02	TARBP2	Tar (HIV-1) RNA binding protein 2	NM_134324	6895	21	1	-0.118181	0.251375	-0.211504	0.0365259	-0.132974	-0.300659	-0.208814	-0.177305	-0.0703893	0	-0.0816838	-0.487794	-0.21874	-0.476028	-0.754244	-0.716646	-0.485427	-0.864117	-0.732896	-0.711495	-0.786596	-0.563429	-0.771584
HUXP1055F08	YWHAB	tyrosine 3-monooxygenase/tryptophan 5-monooxygenase activation protein, beta polypeptide	NM_139323	7529	21	1	-0.234681	-0.113285	-0.216875	-0.322594	-0.276731	-0.18927	-0.223821	-0.0771384	-0.113942	-0.313038	-0.361749	-0.132202	-0.448328	-0.688641	-0.511223	-0.754675	-0.758242	-0.698274	-0.380918	-0.61793	-0.702614	-0.769239	-0.588275
HUXP1001C08	REEP5	receptor accessory protein 5	NM_005669	7905	21	1	-0.0909085	-0.0578312	-0.18194	-0.595158	-0.120294	-0.169925	-0.224265	0.0948592	-0.0116818	-0.055343	-0.108641	-0.287981	-0.574583	-0.629454	-0.640919	-0.798366	-0.382146	-0.443919	-0.258245	-0.223438	-0.628441	-0.723482	-0.54128
HUXP1166B11	ANP32A	acidic (leucine-rich) nuclear phosphoprotein 32 family, member A	BC064969	8125	21	1	-0.15605	-0.0576856	-0.155073	-0.128816	-0.115017	-0.070443	-0.0322283	0.0103945	-0.115422	-0.124258	-0.0848889	-0.167902	-0.349882	-0.538884	-0.590685	-0.695188	-0.794371	-0.376465	-0.376212	-0.287053	-0.513372	-0.452512	-0.189581
HUXP1058B08	CSDA	cold shock domain protein A	NM_003651	8531	21	1	-0.182829	-0.0993375	-0.124314	-0.115584	-0.16133	-0.0859621	-0.148053	-0.117713	-0.0836639	-0.158494	-0.267124	-0.096501	-0.310467	-0.592901	-0.403116	-0.664075	-0.631466	-0.732483	-0.624745	-0.502813	-0.819509	-0.74478	-0.541641
HUXP1074H05	PRKRA	protein kinase, interferon-inducible double stranded RNA dependent activator	NM_003690	8575	21	1	-0.0950378	-0.290743	-0.21116	-0.0613238	-0.243687	-0.134749	-0.227623	0	-0.355153	-0.219966	-0.233672	-0.19698	-0.422379	-0.621226	-0.344133	-0.486438	-0.470891	-0.630243	-0.423768	-0.298376	-0.783218	-0.550887	-0.22634
SHR020061013G03	C4orf9	chromosome 4 open reading frame 9	Hs.398178	8602	21	1	-0.164884	-0.105046	-0.160936	-0.215835	-0.139988	-0.225972	-0.125835	-0.0489096	-0.0464356	-0.18852	-0.114035	0.0268666	-0.240073	-0.344037	-0.456858	-0.623259	-0.699295	-0.822541	-0.607683	-0.314192	-0.827163	-0.847326	-0.602316
HUXP1159B03	NFS1	NFS1 nitrogen fixation 1 homolog (S. cerevisiae)	NM_021100	9054	21	1	-0.0859001	-0.443607	-0.159308	-0.295649	-0.168682	-0.060121	-0.118941	-0.305936	NaN	-0.0995357	-0.341405	-0.291049	-0.569109	-0.91272	-0.566769	-0.563318	-0.580846	-0.485427	-0.362067	-0.307182	-0.352078	-0.513409	-0.29956
HUXP1054F03	PIAS2	protein inhibitor of activated STAT, 2	NM_173206	9063	21	1	-0.161502	-0.199638	-0.0662337	-0.00468408	-0.113657	-0.116767	-0.143269	-0.132974	-0.160796	-0.201442	-0.190305	-0.129056	-0.235761	-0.647862	-0.507426	-0.559276	-0.676331	-0.557612	-0.295635	-0.444725	-0.706128	-0.753434	-0.452924
HUXP1155A10	DDX21	DEAD (Asp-Glu-Ala-Asp) box polypeptide 21	NM_004728	9188	21	1	-0.195526	-0.0944536	0.223467	-0.0533671	-0.142823	-0.0393071	-0.0493837	0.148162	0.121287	-0.00282162	0.388426	-0.233302	-0.278532	-0.434122	-0.566402	-0.834083	-0.814031	-0.537551	-0.476484	-0.353377	-0.661032	-0.343174	-0.462319
SHR020061029D08	COPS2	COP9 constitutive photomorphogenic homolog subunit 2 (Arabidopsis)	Hs.369614	9318	21	1	-0.115715	-0.222392	-0.156804	-0.454137	-0.227133	-0.0486348	0.0187874	0.0637256	0.076386	-0.146157	-0.112873	-0.492844	-0.43416	-0.460114	-0.5006	-0.65085	-0.78136	-0.702095	-0.707218	-0.457145	-0.57924	-0.440182	-0.316059
HUXP1073D01	HMGN3	high mobility group nucleosomal binding domain 3	NM_138730	9324	21	1	-0.14826	-0.0154537	-0.184928	-0.244412	-0.239799	-0.0665977	-0.260875	-0.138828	-0.154425	-0.220949	-0.12419	-0.234129	-0.470773	-0.613205	-0.529087	-0.792529	-0.558114	-0.486686	-0.434096	-0.27758	-0.367439	-0.628216	-0.181607
SHR020061026F06	ATP5J2	ATP synthase, H+ transporting, mitochondrial F0 complex, subunit F2	NM_001003713	9551	21	1	-0.111578	-0.23388	0.0366061	-0.147629	-0.110318	-0.154718	-0.189485	-0.0316603	-0.166717	-0.270697	-0.225578	-0.214403	-0.323509	-0.523395	-0.359601	-0.62421	-0.506605	-0.33996	-0.388429	-0.417474	-0.623546	-0.73161	-0.42786
SHR020060010F09	NPM3	nucleophosmin/nucleoplasmin, 3	AF079325	10360	21	1	-0.126633	-0.176507	-0.326429	-0.18124	-0.137001	-0.219218	-0.25048	0.0479345	-0.0138058	-0.316857	-0.11423	-0.230708	-0.311255	-0.336545	-0.60248	-0.715023	-1.0458	-0.70044	-0.89503	-0.265461	-1.2718	-0.876517	-0.531782
HUXP1011E05	HBXIP	hepatitis B virus x interacting protein	NM_006402	10542	21	1	-0.175258	-0.132689	-0.105203	-0.105035	-0.260212	-0.243703	-0.209755	0	0.028759	-0.142647	-0.205274	-0.00431945	-0.537234	-0.530222	-0.5157	-0.652729	-0.611879	-0.202817	-0.479564	-0.385981	-0.59561	-0.416385	-0.431716
HUXP1048G02	ARPP-19	cyclic AMP phosphoprotein, 19 kD	NM_006628	10776	21	1	-0.22741	-0.0884849	-0.037389	-0.180635	-0.0770615	0.00829932	-0.0562606	-0.0144705	-0.135296	-0.0981343	-0.152727	-0.178918	-0.420723	-0.803743	-0.518785	-0.726687	-0.50515	-0.522548	-0.502158	-0.393291	-0.882464	-0.694292	-0.574284
HUXP1090C01	EXOC3	exocyst complex component 3	Hs.481464	11336	21	1	-0.147226	-0.24029	-0.128898	-0.405256	-0.133267	-0.462343	-0.125013	-0.437405	0.116918	-0.284839	-0.546894	-0.595158	-0.703507	-0.875128	-0.408582	-0.626783	-0.765535	-0.655352	-0.762703	-0.369695	-0.819918	-0.45805	-0.466367
SHR020061024B02	BICD2	bicaudal D homolog 2 (Drosophila)	NM_001003800	23299	21	1	-0.150886	-0.115709	-0.318096	-0.268105	-0.176106	-0.17067	-0.149003	-0.24157	-0.0767258	-0.0354488	0	-0.267607	-0.599965	-0.444272	-0.556192	-0.621716	-0.905033	-0.609327	-0.319332	-0.356847	-0.415037	-0.305322	-0.163886
HUXP1201A09	SNAPAP	SNAP-associated protein	NM_012437	23557	21	1	-0.328556	0.180644	-0.226297	-0.067957	-0.116774	-0.0850152	0.117005	-0.213849	-0.324525	-0.431883	-0.468978	-0.396192	-0.304142	-0.762798	-0.502891	-0.813924	-0.742142	-0.6299	-0.710658	-0.608219	-0.720138	-0.711256	-0.645023
HUXP1013G03	ARL5A	ADP-ribosylation factor-like 5A	NM_177985	26225	21	1	-0.206654	-0.140069	0.058103	-0.205234	-0.229963	-0.1874	-0.0660663	0.0723602	-0.101206	-0.0997443	-0.0237595	-0.296393	-0.323869	-0.453867	-0.541969	-0.662965	-0.50851	-0.436099	-0.463353	-0.406741	-0.473008	-0.368387	-0.301604
HUXP1205D08	C3orf28	chromosome 3 open reading frame 28	NM_014367	26355	21	1	0.150657	-0.327269	-0.109208	-0.375039	-0.222577	-0.183425	-0.135681	-0.142294	-0.0531497	-0.26036	-0.343484	-0.0792728	-0.562177	-0.611258	-0.489858	-0.801143	NaN	-0.542527	-0.722466	-0.544151	-1.09085	-0.673123	-0.449278
HUXP1063G06	PPA2	pyrophosphatase (inorganic) 2	NM_176869	27068	21	1	-0.218599	-0.12674	-0.205981	-0.40632	-0.201634	-0.114864	-0.143298	-0.26376	-0.203359	-0.0891705	-0.20916	-0.0971627	-0.44683	-0.512299	-0.531765	-0.701812	-0.478554	-0.515819	-0.49279	-0.393627	-0.598064	-0.743404	-0.469407
HUXP1011D03	CCDC22	coiled-coil domain containing 22	NM_014008	28952	21	1	-0.299014	-0.132993	0.0535219	-0.0513012	-0.0552499	-0.0231577	-0.124048	0.205424	0.0572249	0.0267173	-0.290677	0.119086	-0.419831	-0.764456	-0.517324	-0.528968	-0.627725	-0.150417	-0.398866	-0.344511	-0.673499	-0.500525	-0.434049
HUXP1077A06	C6orf49	chromosome 6 open reading frame 49	NM_013397	29964	21	1	-0.15163	0.0499769	-0.11423	-0.0851918	-0.0716718	-0.0729608	-0.0932052	-0.135478	-0.0368874	-0.0557897	-0.162287	-0.13999	-0.457142	-0.802255	-0.590633	-0.876131	-0.828324	-0.58537	-0.512229	-0.316642	-0.540369	-0.398527	-0.180596
SHR020061016B04	FAM82B	family with sequence similarity 82, member B	NM_016033	51115	21	1	-0.00992739	-0.0195425	-0.035016	0.0205021	0.0145533	-0.0190237	-0.0410228	0.0639902	0.175307	0.137228	0.266701	-0.0917393	-0.303854	-0.514839	-0.669236	-0.754529	-0.703058	-0.714339	-0.765617	-0.39685	-0.813961	-0.478392	-0.245749
HUXP1013B08	SS18L2	synovial sarcoma translocation gene on chromosome 18-like 2	NM_016305	51188	21	1	-0.256204	-0.105493	-0.0882958	-0.2005	-0.194932	-0.198933	-0.12883	-0.106008	-0.169083	-0.398736	-0.307005	-0.242701	-0.473931	-0.59424	-0.516184	-0.664931	-0.708537	-0.565854	-0.392588	-0.40982	-0.828975	-0.468631	-0.264647
HUXP1064H04	CCDC72	coiled-coil domain containing 72	NM_015933	51372	21	1	-0.0879522	-0.2461	-0.0444362	-0.244274	-0.167339	-0.0822879	-0.142225	-0.065512	-0.0758506	-0.0844963	-0.128304	0.0219062	-0.283418	-0.490621	-0.417809	-0.533391	-0.556248	-0.431716	-0.448715	-0.391218	-0.756482	-0.441428	-0.410408
HUXP1074E04	MRPS17	mitochondrial ribosomal protein S17	NM_015969	51373	21	1	-0.271709	-0.0716083	-0.02546	-0.261243	-0.294834	-0.134301	-0.182147	0.0774441	-0.0752881	-0.261946	-0.334038	-0.33134	-0.548983	-0.490528	-0.690316	-0.556262	-0.564663	-0.652077	-0.560468	-0.321928	-0.625187	-0.567229	-0.339958
HUXP1205G12	BRP44L	brain protein 44-like	NM_016098	51660	21	1	-0.137299	-0.167727	0.0851291	-0.216037	-0.136597	-0.108357	-0.235644	-0.376084	-0.045125	-0.115914	0.0548442	0.210659	-0.371701	-0.34225	-0.419807	-0.643144	-0.625956	-0.794251	-0.578893	-0.529634	-0.683568	-0.622456	-0.41689
HUXP1161C10	KIAA1217	KIAA1217	NM_019590	56243	21	1	-0.0854394	-0.0424319	-0.0788677	-0.026539	-0.0723619	-0.0499604	-0.149979	-0.00464076	-0.0417112	-0.077272	0.109795	-0.167562	-0.492455	-0.427072	-0.566803	-0.832159	-0.658939	-0.705035	-0.692749	-0.502258	-0.70734	-0.569425	-0.250379
HUXP1178H01	TM9SF3	transmembrane 9 superfamily member 3	AI535688	56889	21	1	-0.113798	-0.205382	-0.21818	-0.554056	-0.182789	0.0429885	-0.00835137	-0.131245	0.0323177	-0.0581811	-0.031338	-0.167894	-0.25519	-0.549185	-0.325941	-0.693147	-0.813904	-0.288188	-0.314749	-0.263812	-0.749323	-0.554589	-0.583814
HUXP1189D06	C1orf119	chromosome 1 open reading frame 119	NM_020141	56900	21	1	-0.158237	-0.253372	-0.0188295	-0.367899	-0.238935	-0.189021	-0.208789	-0.1676	-0.231508	-0.300245	-0.206856	-0.26245	-0.471346	-0.468176	-0.483419	-0.631181	-0.512574	NaN	-0.431043	-0.263209	-0.455871	-0.469321	-0.293581
HUXP1102C07	ERGIC1	endoplasmic reticulum-golgi intermediate compartment (ERGIC) 1	AF267855	57222	21	1	-0.0241125	-0.0933715	-0.373043	-0.190462	-0.317615	-0.263034	-0.371411	-0.188267	-0.361188	-0.467779	-0.47502	-0.197037	-0.4397	-0.631545	-0.745954	-0.592825	-0.827163	NaN	-0.603341	-0.459432	-0.672667	-0.5025	-0.311944
HUXP1029C01	MOSC1	MOCO sulphurase C-terminal domain containing 1	NM_022746	64757	21	1	0.0721498	-0.217872	0.113211	-0.0544478	0.00749454	-0.0688951	0.0470486	0.0140069	0.0987782	-0.280901	-0.296775	-0.104634	-0.649503	-0.807355	-0.459432	-0.908118	-0.292782	-0.628906	-0.831151	-0.266601	-0.538669	-0.535209	-0.464021
HUXP1128H09	C10orf95	chromosome 10 open reading frame 95	AL050035	79946	21	1	-0.0230836	-0.119777	0.10188	0.282639	-0.30382	-0.332464	-0.415767	0.0486738	-0.20407	-0.581816	-0.419497	-0.206451	-0.692818	-0.579865	-0.603751	-0.569899	-0.807355	-0.61471	-0.716429	-0.516153	-0.736966	-0.608809	-0.47032
HUXP1188A08	C14orf156	chromosome 14 open reading frame 156	NM_031210	81892	21	1	-0.331324	-0.12318	-0.117551	-0.206141	-0.149757	-0.146968	-0.114938	-0.128045	-0.152918	-0.193407	-0.0348762	0.117751	-0.326481	-0.555676	-0.44615	-0.898625	-0.68605	-0.753391	-0.719637	-0.502154	-1.21601	-0.798585	-0.222521
HUXP1106H01	BEX2	brain expressed X-linked 2	NM_032621	84707	21	1	-0.163926	-0.183358	-0.14099	-0.0729794	0.0819416	-0.117133	-0.0688768	-0.197939	-0.211729	-0.175497	-0.271027	-0.16946	-0.310103	-0.56052	-0.436682	-0.572846	-0.495325	-0.675565	-0.361228	-0.244978	-0.626256	-0.421827	-0.345702
HUXP1175G07	FLJ14397	hypothetical protein FLJ14397	NM_032779	84865	21	1	-0.272024	0.274331	-0.405732	-0.1852	-0.142854	0.00863945	0.086583	-0.209539	-0.192957	-0.297757	-0.36724	-0.334341	-0.717768	-0.460128	-0.340018	-0.672937	-0.534046	-0.528206	-0.539678	-0.425953	-0.589553	-0.674304	-0.393101
HUXP1183H06	C1QL3	complement component 1, q subcomponent-like 3	NM_001010908	389941	21	1	-0.0658246	-0.227739	-0.0928873	-0.348179	-0.167894	-0.0986843	-0.198297	-0.147296	-0.172946	-0.147104	-0.156119	-0.293393	-0.558196	-0.591123	-0.597241	-0.599506	-0.532304	-0.3904	-0.381988	-0.234091	-0.533491	-0.420038	-0.481028
SHR020060014A05	TNFRSF17	tumor necrosis factor receptor superfamily, member 17	NM_001192	608	22	1	-0.0726037	0.0287764	-0.115941	-0.131644	-0.0429086	-0.268817	0.0347654	0.0229916	0.0730635	-0.195664	-0.0442428	0.15899	-0.0542902	-0.0677901	-0.216811	-0.370112	-0.460841	-0.436099	-0.47699	-0.345672	-0.719892	-0.70044	-0.442388
HUXP1003E02	RCC1	regulator of chromosome condensation 1	CR604404	1104	22	1	-0.208108	0.00248384	-0.259662	-0.13514	-0.265546	-0.117523	-0.30958	-0.196363	-0.206881	-0.161618	-0.284337	0.202452	-0.21684	-0.306607	-0.293408	-0.408921	-0.31946	-0.576298	-0.411725	-0.523328	-0.904464	-0.88822	-0.457312
HUXP1167F08	COPA	coatomer protein complex, subunit alpha	NM_004371	1314	22	1	-0.209551	0.0709693	-0.124638	-0.0817896	-0.13745	0.19102	0.24855	0.250824	-0.128035	-0.208882	-0.211936	-0.0737082	-0.494023	-0.814844	-0.239954	-0.693245	-0.247558	-0.0679437	-0.416398	-0.198133	-0.595051	-0.527008	-1.35551
HUXP1103E06	CPS1	carbamoyl-phosphate synthetase 1, mitochondrial	NM_001875	1373	22	1	-0.129349	-0.149738	-0.182176	-0.166752	-0.226358	-0.140973	-0.15837	-0.210884	-0.372576	-0.279542	-0.335014	-0.0316189	-0.218942	-0.255267	-0.226849	-0.415262	-0.330105	-0.414178	-0.401333	-0.373697	-1.04442	-0.842143	-0.161775
HUXP1057D01	CSE1L	CSE1 chromosome segregation 1-like (yeast)	NM_001316	1434	22	1	0.0106585	0.152918	0.0341646	-0.0809094	0.151077	-0.0439941	-0.0952378	0.162028	-0.0478766	-0.0530184	-0.133924	0.137231	-0.177331	-0.448765	-0.22565	-0.397498	-0.327734	-0.313581	-0.473322	-0.432777	-0.845542	-0.789162	-0.464566
HUXP1128C06	DHFR	dihydrofolate reductase	NM_000791	1719	22	1	-0.163499	0.155581	-0.0210178	-0.00503559	-0.0382193	0	-0.041188	0.00715979	0.0793682	0.102686	-0.0726952	-0.0373938	-0.171236	-0.470545	-0.327007	-0.444345	-0.292355	-0.18703	-0.235813	-0.112658	-0.842459	-0.797592	-0.480579
HUXP1198E10	BPTF	bromodomain PHD finger transcription factor	AB032251	2186	22	1	-0.242021	-0.218953	-0.215729	-0.21042	-0.174498	-0.0255351	-0.146221	-0.101402	-0.315502	-0.240517	-0.117836	0.0227201	-0.300081	-0.286304	-0.231326	-0.302796	-0.0641303	-0.485427	-0.405586	-0.253119	-0.773724	-0.602665	-0.650254
HUXP1062G10	LSS	lanosterol synthase (2,3-oxidosqualene-lanosterol cyclase)	NM_002340	4047	22	1	0.251539	-0.0439171	0.151533	-0.0252163	0.115821	0.049213	0.0804899	0.189398	-0.167727	-0.0934866	-0.274757	-0.260989	-0.139122	-0.536187	-0.576835	-0.571727	-0.258152	-0.443382	-0.517576	-0.459432	-0.603341	-0.476677	-0.726318
HUXP1101D03	YBX1	Y box binding protein 1	NM_004559	4904	22	1	-0.16695	0.0588053	-0.045114	-0.0556941	-0.0986446	-0.164488	-0.0915829	-0.128873	-0.00707798	-0.0342349	0.0245104	0.204403	-0.157497	-0.228035	-0.161156	-0.583001	-0.314332	-0.4618	-0.481994	-0.428837	-0.936396	-0.70245	-0.486385
HUXP1064G05	PCMT1	protein-L-isoaspartate (D-aspartate) O-methyltransferase	NM_005389	5110	22	1	-0.120294	0.00259711	-0.0506261	-0.0792889	-0.181656	-0.0651842	-0.344154	0.00527494	-0.149824	-0.0909462	-0.0189416	0.167805	-0.0941954	-0.182377	-0.237039	-0.430952	-0.123483	-0.306807	-0.284825	-0.569509	-0.716828	-0.745553	-0.691878
HUXP1125B12	PCNA	proliferating cell nuclear antigen	NM_182649	5111	22	1	-0.325793	0.223279	-0.101505	-0.0279162	-0.0338735	0.112568	0.087348	0.11608	-0.0114177	0.0120457	-0.129323	-0.153518	-0.354137	-0.610631	-0.340797	-0.630897	-0.323676	-0.282048	-0.512285	-0.378222	-0.739771	-0.724259	-0.268205
HUXP1212A09	PLAGL1	pleiomorphic adenoma gene-like 1	NM_006718	5325	22	1	-0.0709665	-0.128008	-0.137019	-0.182544	-0.38247	-0.148523	-0.235531	0.17603	-0.222392	-0.0519278	0.161062	-0.116976	-0.325486	-0.428405	-0.326228	-0.333972	0.0118741	-0.218001	-0.241706	-0.215268	-0.384341	-1.01057	-0.587965
HUXP1093D12	PTPRN	protein tyrosine phosphatase, receptor type, N	NM_002846	5798	22	1	0.197503	-0.132001	0.0283709	-0.313901	-0.0908236	-0.0496523	0.0522724	-0.0713717	-0.343034	-0.308459	-0.197939	-0.221396	-0.0940116	-0.154358	-0.0264722	-0.435133	-0.0805313	-0.6154	-0.268663	-0.419008	-0.593	-0.73167	-0.389021
HUXP1103F04	ROBO1	roundabout, axon guidance receptor, homolog 1 (Drosophila)	NM_133631	6091	22	1	-0.311415	-0.134965	-0.213707	-0.169172	-0.246494	-0.0577155	-0.0977198	-0.0426062	-0.312342	-0.229697	-0.237039	0.00700339	-0.160335	-0.26366	-0.2304	-0.384664	-0.295933	-0.386125	-0.348967	-0.233672	-0.83715	-0.721859	-0.136021
HUXP1127D01	RPL7	ribosomal protein L7	NM_000971	6129	22	1	-0.0455846	-0.224451	-0.0357387	-0.229873	-0.132639	-0.10082	-0.226352	0.18682	-0.123628	-0.198714	-0.295365	-0.0799272	-0.270669	-0.541809	-0.204213	-0.562378	-0.320319	-0.324601	-0.416807	-0.364019	-0.866899	-0.718018	-0.398693
HUXP1040B01	RPL9	ribosomal protein L9	NM_001024921	6133	22	1	-0.0727046	-0.152457	0.0753289	-0.21888	-0.179051	-0.138406	-0.168187	0.0632682	-0.268143	-0.195587	-0.108486	0.0402237	-0.307043	-0.32765	-0.105368	-0.466932	-0.321323	-0.258402	-0.367408	-0.289039	-0.838089	-0.660817	-0.309974
HUXP1078D10	RPL32	ribosomal protein L32	NM_001007074	6161	22	1	-0.259937	-0.364901	-0.0678616	-0.209596	-0.211548	-0.0868737	-0.175649	-0.0412366	-0.209945	-0.139583	-0.288901	0.108658	-0.289977	-0.458148	-0.0847794	-0.446767	-0.365087	-0.347457	-0.428098	-0.335284	-0.976172	-0.570716	-0.543324
HUXP1074D09	RPL34	ribosomal protein L34	NM_000995	6164	22	1	-0.206713	0.0311199	-0.107035	-0.386851	-0.185711	-0.194259	-0.213712	0.0766902	-0.177261	-0.29506	-0.142336	0.119729	-0.312946	-0.382852	-0.244744	-0.439721	-0.336118	-0.487377	-0.398955	-0.421541	-0.926394	-0.765443	-0.458991
HUXP1074F03	RPL37	ribosomal protein L37	AV744541	6167	22	1	-0.189036	-0.19242	-0.221766	-0.270056	-0.147633	-0.217989	-0.18194	-0.0919834	-0.288079	-0.273536	-0.216369	0.00446179	-0.304921	-0.343305	-0.0572906	-0.396465	-0.214282	-0.360574	-0.374818	-0.337501	-0.922157	-0.660716	-0.329194
HUXP1010A03	RPL37A	ribosomal protein L37a	NM_000998	6168	22	1	-0.207126	-0.129747	0.122207	-0.2203	-0.0374892	0.0498845	-0.155622	-0.114975	0.00630431	-0.03484	-0.31879	0.0681579	-0.394825	-0.226357	-0.293143	-0.0930829	-0.186588	-0.356007	-0.350099	-0.36051	-0.812478	-0.707374	-0.418594
HUXP1117B03	RPS7	ribosomal protein S7	NM_001011	6201	22	1	-0.126511	0.044489	0.059096	0.0216422	-0.0322609	-0.0210659	-0.0726417	-0.0592348	0.0114485	-0.103891	-0.170389	0.0160792	-0.308246	-0.620524	0.231326	-0.66535	0.0222814	-0.261802	-0.250826	-0.456844	-0.652077	-0.607649	-0.537131
HUXP1071E05	RPS13	ribosomal protein S13	NM_001017	6207	22	1	-0.142199	-0.103109	-0.0727563	-0.367709	-0.172892	-0.0868918	-0.0785528	-0.128973	-0.153593	-0.331731	-0.101806	0.239485	-0.368276	-0.721399	-0.468081	-0.615425	-0.469577	-0.497481	-0.490006	-0.327426	-0.760101	-0.912457	-0.760558
HUXP1129B12	RPS15A	ribosomal protein S15a	NM_001019	6210	22	1	-0.242636	-0.121903	-0.103859	-0.130331	-0.159267	-0.10406	-0.241739	-0.163512	-0.199714	-0.195048	-0.267348	0.0237472	-0.343984	-0.205096	-0.245493	-0.669429	-0.31463	-0.330348	-0.689619	-0.850242	-0.673754	-0.422527	-0.535927
HUXP1078D05	RPS23	ribosomal protein S23	NM_001025	6228	22	1	-0.144276	-0.188601	-0.0164185	-0.247257	-0.0420707	-0.0992584	-0.17807	-0.121058	-0.03468	-0.058466	-0.216784	0.123132	-0.169095	-0.478637	-0.277687	-0.716685	-0.353773	-0.387782	-0.451599	-0.310197	-0.787258	-0.609854	-0.280308
HUXP1121D08	RPS24	ribosomal protein S24	NM_001026	6229	22	1	-0.22373	-0.118025	-0.165902	-0.569646	-0.404892	-0.177661	-0.223814	-0.10711	-0.240254	-0.268925	-0.288708	0.0916884	-0.471368	-0.404172	-0.279073	-0.708105	-0.374004	-0.483258	-0.547807	-0.383479	-1.05952	-0.940185	-0.649377
HUXP1073H05	RPS25	ribosomal protein S25	NM_001028	6230	22	1	-0.155828	-0.189147	-0.138324	-0.259586	-0.228579	-0.113834	-0.270539	-0.22581	-0.173852	-0.199722	-0.170051	-0.0337148	-0.479063	-0.451504	-0.246559	-0.546673	-0.439202	-0.383231	-0.479954	-0.363708	-0.884527	-0.714732	-0.361119
HUXP1065E10	SCD	stearoyl-CoA desaturase (delta-9-desaturase)	NM_005063	6319	22	1	0.0838694	-0.099116	-0.434262	-0.563676	-0.151482	-0.0583333	-0.181401	-0.0913575	-0.545604	-0.35599	-0.0593911	-0.133846	0.212046	-0.278507	-0.389305	-0.648049	-0.148048	-0.705519	-1.04106	-1.10944	-1.35109	-0.760929	-0.912985
HUXP1152B01	CCL5	chemokine (C-C motif) ligand 5	NM_002985	6352	22	1	-0.101538	-0.091656	0.00473015	-0.158366	0.0509614	0.0427496	-0.0356239	0.0147718	-0.0941905	-0.109192	-0.152925	0.0225426	-0.26909	-0.441649	-0.414283	-0.387452	-0.505465	-0.472371	-0.395553	-0.262368	-0.859822	-0.695145	-0.347404
SHR020061020A05	SNRPE	small nuclear ribonucleoprotein polypeptide E	NM_003094	6635	22	1	-0.210471	-0.115136	-0.187926	-0.356975	-0.282963	-0.134316	-0.157045	-0.158158	-0.230236	-0.184157	-0.185509	-0.0668034	-0.297797	-0.47937	-0.288853	-0.73284	-0.394681	-0.407114	-0.407334	-0.335361	-0.676768	-0.620496	-0.314175
HUXP1040F12	TFRC	transferrin receptor (p90, CD71)	NM_003234	7037	22	1	-0.278716	0.144759	-0.12324	-0.495446	0.0462113	0.0820358	0.0305075	0.154256	-0.0479345	0.00925797	0.0625613	0.183155	0.0256546	-0.41602	-0.845858	-0.917873	-0.245531	-0.661452	-0.290192	-0.303455	-0.965235	-1.12322	-0.277443
HUXP1162C04	TPD52	tumor protein D52	NM_005079	7163	22	1	-0.0648998	0.0636161	0.00582908	0.0384101	-0.0888093	-0.0557633	-0.133678	-0.0756344	0.095759	-0.0790079	NaN	0.0144127	-0.0674709	-0.208063	-0.257388	-0.728291	-0.433719	NaN	-0.666719	-0.827533	-0.913288	-0.904843	-0.640672
HUXP1020D09	UROD	uroporphyrinogen decarboxylase	NM_000374	7389	22	1	-0.348997	0.354291	0.423041	0.292235	0.266455	-0.0277361	0.118689	0.291193	0.129625	0.13541	0.0396136	0.261998	0.173683	-1.43055	0.0972378	-0.469021	-0.352819	-0.184097	-1.25364	-1.16617	-0.986577	-0.654292	-1.26905
HUXP1010B08	CDK2AP1	CDK2-associated protein 1	NM_004642	8099	22	1	-0.119643	-0.135832	-0.0046019	-0.281712	-0.204014	-0.250205	-0.153783	-0.47122	-0.197646	-0.060754	-0.20553	-0.025091	-0.434628	-0.40952	-0.450661	-0.438084	-0.417018	-0.311461	-0.357967	-0.544483	-0.815353	-0.484561	-0.579034
HUXP1061G09	MATR3	matrin 3	NM_018834	9782	22	1	-0.156795	-0.101423	-0.0438949	-0.37996	-0.346596	-0.0886443	-0.171747	0.0653018	-0.214474	-0.209219	-0.136548	-0.0911299	-0.281618	-0.432179	-0.374176	-0.596576	-0.425833	-0.469907	-0.428465	-0.440485	-0.747801	-0.676503	-0.645218
HUXP1029F01	HRSP12	heat-responsive protein 12	NM_005836	10247	22	1	0.0328314	0.108836	0.206451	-0.235554	0.0653408	0.00625899	0.0513188	-0.124651	-0.0502732	-0.242701	-0.0754074	0.0409718	-0.162815	-0.503168	-0.583075	-0.926804	-0.159066	-0.288345	-0.71097	-0.946229	-1.04342	-0.965235	-0.783813
HUXP1005E03	FSTL3	follistatin-like 3 (secreted glycoprotein)	NM_005860	10272	22	1	-0.304969	-0.298778	-0.0635185	-0.108857	-0.117446	-0.130723	-0.308073	-0.246456	0.0909085	-0.156535	-0.269573	0.19357	-0.401414	-0.592304	-0.249873	-0.477799	-0.402098	-0.205904	-0.239279	-0.152338	-0.725773	-0.81451	-0.351329
HUXP1074H04	KHDRBS1	KH domain containing, RNA binding, signal transduction associated 1	NM_006559	10657	22	1	-0.243659	-0.176821	-0.0592107	-0.117575	-0.134855	-0.110424	-0.132674	-0.0245163	-0.234195	-0.194735	-0.0923251	-0.0113153	-0.165696	-0.259357	-0.155037	-0.219711	-0.168534	-0.314839	-0.212279	-0.465947	-0.725889	-0.77593	-0.436099
HUXP1060F11	DBF4	DBF4 homolog (S. cerevisiae)	NM_006716	10926	22	1	-0.258016	-0.0764638	-0.181929	-0.313482	-0.216227	-0.180121	-0.0955482	-0.0662511	-0.266962	-0.206753	-0.108209	-0.135027	-0.232571	-0.326566	-0.284118	-0.560004	-0.252063	-0.413559	-0.373169	-0.548234	-0.647504	-0.532348	-0.394631
HUXP1065A06	YWHAQ	tyrosine 3-monooxygenase/tryptophan 5-monooxygenase activation protein, theta polypeptide	NM_006826	10971	22	1	-0.197907	0.0965685	-0.0401768	-0.129676	-0.100118	-0.0577451	-0.160044	-0.0161721	-0.059042	-0.0642602	-0.0130957	0.161579	-0.263746	-0.378109	-0.253448	-0.462913	-0.34964	-0.249359	-0.311671	-0.324727	-0.803757	-0.566836	-0.496971
HUXP1103G10	JMJD2C	jumonji domain containing 2C	NM_015061	23081	22	1	-0.0227082	-0.0643967	-0.167652	-0.190175	-0.212553	-0.109101	-0.190472	0.0014759	-0.277387	-0.173303	-0.146215	0.0983316	-0.297483	-0.281092	-0.186116	-0.332275	-0.228742	-0.344938	-0.39826	-0.317359	-0.782783	-0.72975	-0.267963
HUXP1165F09	39331	septin 6	NM_145799	23157	22	1	0.00927781	-0.0861914	0.116724	-0.0355316	-0.176277	-0.0824622	-0.127669	-0.0901978	-0.176251	-0.262147	-0.196397	0	-0.0533922	-0.221758	-0.149602	-0.411842	-0.279654	-0.494197	-0.323233	-0.196692	-0.84723	-0.713287	-0.637842
HUXP1055E04	LPHN3	latrophilin 3	NM_015236	23284	22	1	-0.203872	-0.00946033	-0.128584	-0.251539	0.040642	-0.0246621	-0.442782	NaN	-0.239338	-0.217231	-0.258602	0.0842689	-0.280736	-0.324573	-0.209923	-0.368782	-0.253286	NaN	-0.177643	-0.11221	-0.797013	-0.910733	-0.458488
SHR020061014F05	PREI3	preimplantation protein 3	NM_002157	25843	22	1	-0.0905973	-0.00345123	0.140273	-0.167735	-0.222335	-0.0939717	-0.219346	-0.263865	-0.0896791	-0.141388	0.0259519	0.127646	0.00502707	-0.12975	-0.0561708	-0.528581	-0.120712	-0.331485	-0.552768	-0.368623	-0.841368	-0.679148	-0.330145
HUXP1089G06	RABGEF1	RAB guanine nucleotide exchange factor (GEF) 1	NM_014504	27342	22	1	-0.0629384	-0.0910613	0.00062651	-0.332138	-0.0317342	-0.158079	-0.119002	0.280466	-0.0650407	-0.020242	-0.129253	0.257705	-0.203339	-0.289477	-0.140299	-0.401319	-0.363605	-0.341205	-0.303979	-0.393443	-0.754939	-0.650686	-0.267671
HUXP1072F03	TMEM97	transmembrane protein 97	NM_014573	27346	22	1	-0.154633	-0.102087	-0.119592	-0.179874	-0.12657	-0.141727	-0.136064	-0.117148	-0.148989	-0.1873	-0.20694	0.0953264	-0.227827	-0.47379	-0.110971	-0.418197	-0.253218	-0.3189	-0.310748	-0.293164	-0.658673	-0.796492	-0.236475
HUXP1078D07	GAL	galanin	NM_015973	51083	22	1	0.0280671	0.12759	0.106259	-0.057744	-0.0252546	-0.00163386	-0.0768243	0.0331669	-0.0925921	0.0885755	0.0111837	0.255354	0.0114607	-0.274998	-0.116024	-0.439607	-0.628395	-0.659996	-0.720516	-0.556554	-1.23143	-0.953083	-0.631849
HUXP1101A09	PTPLAD1	protein tyrosine phosphatase-like A domain containing 1	AK074898	51495	22	1	-0.291097	-0.0791766	-0.100288	-0.155489	-0.0820711	-0.0522863	0.0547925	0.109461	0.0202724	-0.0243219	-0.0981804	0.0645935	-0.212382	-0.414218	-0.257085	-0.334193	-0.25673	-0.342733	-0.344828	-0.491703	-0.955254	-0.887525	-0.626519
HUXP1127E07	MRPS33	mitochondrial ribosomal protein S33	NM_053035	51650	22	1	-0.499354	-0.0443624	-0.108667	-0.105709	-0.218377	-0.132894	-0.125961	0.0909737	0.296049	0.246161	-0.0837929	-0.0700784	-0.224467	-0.496369	-0.406625	-0.330838	-0.323838	-0.40478	-0.411042	-0.22619	-0.773148	-0.567808	-0.482782
HUXP1164A01	CSNK1G1	casein kinase 1, gamma 1	NM_014736	53944	22	1	-0.234875	-0.0845831	-0.167989	-0.0536986	-0.142964	-0.11371	-0.177187	-0.169109	-0.11536	-0.0811743	-0.0727156	0.0539534	-0.234341	-0.331071	-0.242128	-0.546866	-0.309424	-0.402362	-0.570675	-0.563325	-0.761148	-0.96357	-0.599191
HUXP1200A09	LOC54103	hypothetical protein LOC54103	AL079277	54103	22	1	-0.0509239	-0.0905518	-0.0616191	-0.0622843	0.017278	-0.0267173	-0.0121747	-0.0520885	0.0762356	-0.048363	-0.171187	-0.263034	-0.496305	-0.740757	-0.489482	-0.646949	NaN	-0.290779	-0.46068	-0.390952	-0.584963	-1.33366	-1.20126
HUXP1167D03	CYTL1	cytokine-like 1	NM_018659	54360	22	1	-0.113657	-0.0317089	0.434976	0.0936131	-0.0867613	0.0161422	-0.0851674	NaN	0.315202	0.215552	0.0743639	0.693022	-0.141012	0.054243	0.0319429	-0.189572	-0.22556	NaN	-0.340519	-0.777608	-0.97837	-2.02002	-1.58929
HUXP1023B06	C12orf48	chromosome 12 open reading frame 48	NM_017915	55010	22	1	-0.0509512	-0.224168	0.0337883	-0.310206	-0.172702	-0.171712	-0.0777477	-0.185662	0	-0.220729	-0.157297	0.0597651	-0.21864	-0.15415	-0.126793	-0.483424	-0.318822	-0.456858	-0.447459	-0.457473	-0.793169	-0.456858	-0.251283
HUXP1109C02	ELAC1	elaC homolog 1 (E. coli)	NM_005359	55520	22	1	-0.124328	0.291463	-0.0795968	NaN	-0.262076	-0.2511	-0.296811	-0.263034	-0.273018	-0.251225	-0.17603	-0.0489096	-0.0921182	-0.208037	0.0403577	-0.307532	-0.175442	NaN	-0.589212	-0.567041	-0.787455	NaN	-0.822357
HUXP1129A10	C14orf118	chromosome 14 open reading frame 118	NM_017972	55668	22	1	-0.0123164	0.0802868	0.185153	0.0900092	-0.0345488	-0.0347618	-0.0977975	0.120322	-0.121785	0.055951	-0.0824833	0.361659	-0.189529	-0.456599	0.0628151	-0.262274	-0.0957483	-0.150666	-0.192629	-0.473049	-1.04135	-1.27559	-0.457657
HUXP1167G04	TNFSF5IP1	tumor necrosis factor superfamily, member 5-induced protein 1	NM_020232	56984	22	1	-0.205639	-0.16015	-0.137189	-0.206935	-0.220364	-0.0627863	-0.0445022	-0.146268	-0.123426	-0.105534	-0.176534	0.0614005	-0.214305	-0.307075	-0.172735	-0.381343	-0.559545	-0.524489	-0.417873	-0.407537	-0.653279	-0.531069	-0.371072
HUXP1055E05	C20orf177	chromosome 20 open reading frame 177	CR612343	63939	22	1	-0.301054	0.0193098	-0.0621948	-0.221158	-0.255839	0.0544478	-0.105855	-0.0615878	-0.285091	0.210567	-0.109878	-0.225634	-0.574951	-0.763766	-0.329921	-0.460568	-0.325986	0.0801703	-0.228906	-0.446462	-0.875138	-0.706269	-0.688056
HUXP1056G09	SLC39A8	solute carrier family 39 (zinc transporter), member 8	NM_022154	64116	22	1	-0.127025	-0.098915	0.0302867	-0.106717	-0.0781434	-0.0380133	-0.152229	-0.148024	-0.17228	-0.114481	-0.138913	0.0130326	-0.165711	-0.227583	-0.2737	-0.70733	-0.309833	-0.565738	-0.507899	-0.345279	-0.897175	-0.635109	-0.574592
HUXP1049B04	C14orf4	chromosome 14 open reading frame 4	NM_024496	64207	22	1	-0.155563	0.0126831	0.0348398	-0.134653	-0.082833	-0.0173916	-0.13776	0.0932908	-0.0407987	-0.0451117	-0.130975	0.15153	-0.153685	-0.360774	-0.226046	-0.424698	-0.260254	-0.465967	-0.378018	-0.391903	-0.895563	-0.826519	-0.506582
HUXP1103F08	MRPS9	mitochondrial ribosomal protein S9	NM_182640	64965	22	1	-0.0429422	-0.0482568	0.00928617	-0.169397	-0.135832	-0.0523912	-0.165615	0.072611	-0.0738119	-0.108973	-0.0676419	0.0552399	-0.200625	-0.272938	-0.126181	-0.390033	-0.223501	-0.390444	-0.371698	-0.319702	-0.824981	-0.699423	-0.158422
HUXP1060A10	CNDP1	carnosine dipeptidase 1 (metallopeptidase M20 family)	NM_032649	84735	22	1	-0.117604	-0.237165	-0.0358007	-0.245961	-0.104189	-0.112768	-0.277781	0.0199915	-0.268768	-0.117357	-0.332829	0.217401	-0.144966	-0.37773	-0.302184	-0.316542	-0.258828	-0.43261	-0.27088	-0.319395	-0.808859	-0.678549	-0.325027
HUXP1109C01	CCDC5	coiled-coil domain containing 5 (spindle associated)	NM_138443	115106	22	1	-0.138898	0	-0.189617	-0.131245	-0.198939	-0.144222	-0.20545	-0.371334	0.0117293	-0.186266	-0.0793842	0.0649322	-0.441838	-0.368455	-0.13361	-0.51224	-0.300174	-0.526546	-0.310583	-0.408919	-0.764187	-0.589175	-0.454706
HUXP1131C12	SFRS12	splicing factor, arginine/serine-rich 12	NM_139168	140890	22	1	-0.00601542	-0.116058	-0.0898855	-0.179886	-0.205114	-0.125057	0.0675859	-0.136817	-0.186059	-0.190725	-0.0705423	-0.180095	-0.320534	-0.124839	-0.0052943	-0.300918	-0.241864	-0.398939	-0.331621	-0.39815	-0.866901	-0.691704	-0.581804
HUXP1213E08	KDELC2	KDEL (Lys-Asp-Glu-Leu) containing 2	NM_153705	143888	22	1	-0.247928	0.00801128	-0.23082	-0.245041	-0.106112	-0.134078	-0.0864435	-0.14901	-0.300233	-0.172316	0.0217496	-0.127075	-0.165178	-0.175766	-0.366706	-0.618824	-0.615336	-0.498454	-0.379004	-0.453144	-1.00438	-1.09622	-0.684013
HUXP1019H06	PTPLB	protein tyrosine phosphatase-like (proline instead of catalytic arginine), member b	NM_198402	201562	22	1	-0.255839	0.0792267	0.171887	0.0336177	-0.140634	-0.217418	-0.102864	-0.177085	-0.0168738	-0.0878892	0.0295443	0.13803	-0.13697	-0.225191	-0.24888	-0.408536	-0.31719	-0.560016	-0.399964	-0.417557	-0.739319	-0.704335	-0.35628
HUXP1131D10	ACTN4	actinin, alpha 4	NM_004924	81	23	1	-0.125934	-0.0850048	-0.0524692	-0.207475	-0.0738833	-0.0392684	-0.253209	-0.0426716	-0.111524	-0.136403	-0.118047	-0.0505591	-0.309386	-0.274037	-0.298168	-0.676084	-0.527762	-0.476503	-0.483915	-0.375538	-0.601496	-0.492621	-0.271265
HUXP1035F08	ALDH3A2	aldehyde dehydrogenase 3 family, member A2	NM_000382	224	23	1	-0.137504	0.0522562	0	-0.0206595	-0.0599425	-0.115477	-0.0386805	0.0402639	-0.0655883	-0.137504	-0.155278	0.0220263	-0.228865	-0.466663	-0.435736	-0.63743	-0.175087	-0.258312	-0.157541	-0.149576	-0.565979	-0.554968	-0.267104
HUXP1062D04	APEX1	APEX nuclease (multifunctional DNA repair enzyme) 1	NM_001641	328	23	1	0.063978	0.0772542	0.00524935	0.0123837	-0.0167015	0.148915	-0.0765642	-0.207698	-0.0184046	-0.142558	-0.133984	0.0687128	-0.445734	-0.438277	-0.500915	-0.551303	-0.441121	-0.523171	-0.461111	-0.229432	-0.527892	-0.52163	-0.357904
HUXP1006B01	BIRC4	baculoviral IAP repeat-containing 4	NM_001167	331	23	1	-0.122034	-0.147701	0.0757197	-0.0818368	-0.204282	-0.122762	-0.178783	-0.330499	-0.0972592	-0.126048	-0.0823989	0.134403	-0.314835	-0.439057	-0.276313	-0.582068	-0.478573	-0.336808	-0.578827	-0.206177	-0.631416	-0.422315	-0.41202
HUXP1115B11	ATIC	5-aminoimidazole-4-carboxamide ribonucleotide formyltransferase/IMP cyclohydrolase	NM_004044	471	23	1	-0.0935442	0.000395097	0.0263461	0.138397	-0.0269473	-0.0371075	-0.0718114	-0.0827344	-0.159794	-0.0129779	0.0207486	-0.0733167	-0.278971	-0.337247	-0.377608	-0.429589	-0.367893	-0.348659	-0.371055	-0.22538	-0.529342	-0.249445	-0.153094
SHR020060002H10	ATP5C1	ATP synthase, H+ transporting, mitochondrial F1 complex, gamma polypeptide 1	NM_001001973	509	23	1	-0.110851	0.0559048	-0.121038	0.0427394	-0.0798988	0.00496625	-0.0319751	-0.241758	-0.162799	-0.0829363	-0.0510355	0.0512253	-0.184717	-0.25434	-0.416803	-0.638314	-0.292161	-0.198802	-0.449278	-0.48341	-0.536289	-0.375893	-0.0391996
HUXP1003F11	ATP5G3	ATP synthase, H+ transporting, mitochondrial F0 complex, subunit C3 (subunit 9)	NM_001689	518	23	1	-0.111185	0.283116	0.0966097	0.0563753	0.00976751	-0.033182	-0.132007	0.134889	0.143655	-0.135886	-0.206941	0.0480512	0.0768156	-0.233936	-0.381543	-0.483539	-0.500327	-0.0572263	-0.406762	-0.233058	-0.582347	-0.310666	-0.0295225
HUXP1001B02	ATP5J	ATP synthase, H+ transporting, mitochondrial F0 complex, subunit F6	NM_001003703	522	23	1	-0.152068	-0.10933	-0.0839013	-0.135693	-0.213154	-0.0296933	-0.185531	-0.123022	-0.187765	-0.161771	-0.153654	0.0529584	-0.27342	-0.520751	-0.303805	-0.479329	-0.320484	-0.199788	-0.196655	-0.194246	-0.420786	-0.526737	-0.178538
SHR020060011C12	ATP5O	ATP synthase, H+ transporting, mitochondrial F1 complex, O subunit (oligomycin sensitivity conferring protein)	NM_001697	539	23	1	-0.156808	-0.0859648	-0.177088	-0.160736	-0.124059	-0.0982137	-0.183452	-0.223615	-0.12743	-0.138702	-0.0808348	0.0805209	-0.274992	-0.372786	-0.256553	-0.478123	-0.347975	-0.211135	-0.257003	-0.160517	-0.710841	-0.492943	-0.445951
HUXP1079G01	ATR	ataxia telangiectasia and Rad3 related	NM_001184	545	23	1	-0.143125	0	-0.0833284	-0.048363	-0.249028	-0.0484985	-0.135655	-0.143909	-0.0848889	0.192645	-0.0524674	0.025091	-0.299902	-0.371969	-0.338169	-0.42158	-0.120294	-0.21864	-0.239575	-0.0931094	-0.403542	-0.567685	-0.267036
HUXP1012E06	BCL2L2	BCL2-like 2	NM_004050	599	23	1	-0.100801	-0.143735	-0.0471952	-0.0458037	-0.108007	-0.0482091	-0.13493	-0.114459	0.0306968	-0.0563992	0.0774045	-0.0905123	-0.338169	-0.194786	-0.22033	-0.192985	-0.545434	-0.402848	-0.335371	-0.434321	-0.4346	-0.359081	-0.380949
HUXP1162H02	CALM1	calmodulin 1 (phosphorylase kinase, delta)	NM_006888	801	23	1	-0.0713846	0.0647472	-0.0491683	-0.0740508	-0.120044	-0.0854825	-0.0259201	-0.176558	-0.0660532	-0.049456	-0.0140104	-0.109959	-0.184939	-0.351103	-0.311158	-0.532134	-0.342819	-0.264412	-0.321843	-0.309359	-0.545675	-0.508434	-0.304732
HUXP1111F02	CALM2	calmodulin 2 (phosphorylase kinase, delta)	NM_001743	805	23	1	-0.0379124	0.123592	0.0765262	0.0553113	0.0630013	0.0669857	-0.00836347	-0.106514	0.0367804	0.02312	0.0253039	0.0482393	-0.258347	-0.41762	-0.319879	-0.690261	-0.475494	-0.461044	-0.447628	-0.204014	-0.435228	-0.418807	-0.114564
HUXP1040A08	CAST	calpastatin	NM_173060	831	23	1	-0.361775	0.198124	-0.162977	-0.190222	-0.113293	-0.0172405	-0.00124747	0.113211	0.0924969	-0.0422872	0.0121236	-0.0451122	-0.27351	-0.340978	-0.34973	-0.476968	-0.380678	-0.324801	-0.278145	-0.384085	-0.704294	-0.722881	-0.293516
HUXP1020E05	CSPG2	chondroitin sulfate proteoglycan 2 (versican)	NM_004385	1462	23	1	-0.315954	0.231532	-0.185701	0.102368	-0.0865095	-0.180286	0.058284	-0.155213	-0.230285	-0.258338	-0.299181	-0.298804	-0.136333	-0.201443	-0.358296	-0.651522	-0.678236	-0.462327	-0.187999	-0.268736	-0.517879	-0.380681	0.293407
HUXP1044A06	DHX15	DEAH (Asp-Glu-Ala-His) box polypeptide 15	NM_001358	1665	23	1	-0.175148	-0.169391	-0.160465	-0.063128	0.311202	-0.0610756	-0.0353812	0.050449	-0.241988	-0.13993	-0.00864261	0.177014	-0.267198	-0.543765	-0.308348	-0.506807	-0.628472	-0.298747	-0.219313	-0.170421	-0.469281	-0.518264	-0.25417
HUXP1007G04	COCH	coagulation factor C homolog, cochlin (Limulus polyphemus)	NM_004086	1690	23	1	-0.0807941	-0.069151	-0.0302322	0.0448015	-0.179868	-0.123549	-0.167162	-0.233233	-0.124787	-0.212677	-0.103378	-0.0206774	-0.26362	-0.401232	-0.330406	-0.708857	-0.546521	-0.411146	-0.393603	-0.18206	-0.534956	-0.409999	-0.222781
HUXP1117E07	DHCR24	24-dehydrocholesterol reductase	NM_014762	1718	23	1	0.0183336	0.00945071	-0.0361714	-0.0270171	0.029425	0.0587526	0.0749815	0.147282	-0.109516	-0.110345	-0.17287	-0.123212	-0.11746	-0.452296	-0.348403	-0.426794	-0.233638	-0.402702	-0.449358	-0.46908	-0.625528	-0.451761	-0.334241
HUXP1201F02	EDNRB	endothelin receptor type B	NM_000115	1910	23	1	0.118181	0.180572	0.115477	-0.475338	-0.0838316	0.011588	-0.171766	0.0665977	-0.307429	NaN	NaN	NaN	0.0740006	0.20581	NaN	-0.0970987	-0.573467	-0.713477	-0.192645	NaN	NaN	-0.349584	-0.452512
HUXP1070A02	FBL	fibrillarin	NM_001436	2091	23	1	0.0241247	0.25182	-0.0610011	-0.0610167	0.216266	0.0355827	-0.108802	0.200551	0.249203	-0.130831	-0.0875932	0.000607834	-0.136558	-0.295483	-0.209733	-0.436058	-0.642641	-0.683422	-0.650558	-0.457513	-0.742538	-0.536769	-0.201341
SHR020060010A04	GRB14	growth factor receptor-bound protein 14	NM_004490	2888	23	1	-0.0168176	-0.075434	0.00446425	-0.0893595	-0.0650706	-0.131996	-0.111668	-0.190407	-0.041562	-0.00209542	-0.0423315	0.0773793	-0.159218	-0.303086	-0.358781	-0.433359	-0.614491	-0.331281	-0.427701	-0.206825	-0.363786	-0.0526803	-0.00549076
HUXP1166A11	GRIA2	glutamate receptor, ionotropic, AMPA 2	NM_000826	2891	23	1	-0.129209	0.0134902	-0.0300781	0.00204493	-0.0419418	-0.13803	-0.0319001	-0.105709	-0.119007	-0.0137619	-0.0409816	0.0997168	0.129671	-0.251636	-0.231191	-0.457583	-0.229588	-0.404271	-0.219402	-0.274622	-0.710844	-0.594521	-0.00302769
HUXP1131A07	GTF2H1	general transcription factor IIH, polypeptide 1, 62kDa	NM_005316	2965	23	1	-0.0329339	-0.00751895	-0.00168244	-0.238745	-0.221468	-0.23816	-0.279604	-0.402816	-0.315023	-0.122256	0.145263	0.121046	-0.039215	-0.186616	-0.240314	-0.529445	-0.392317	-0.511214	-0.396922	-0.561228	-0.562048	-0.781139	-0.0780025
HUXP1071D08	H2AFZ	H2A histone family, member Z	NM_002106	3015	23	1	-0.129997	0.186785	0.135624	0.0557035	0.0422048	0.0298763	-0.000428952	0.00127804	0.0662437	0.0515972	0.112997	0.152547	-0.117427	-0.56776	-0.263346	-0.645141	-0.356643	-0.333583	-0.346007	-0.210178	-0.708497	-0.488896	-0.154039
HUXP1128G01	HNRPK	heterogeneous nuclear ribonucleoprotein K	NM_002140	3190	23	1	-0.162788	0.153835	-0.148795	-0.25647	0.00423285	-0.00434547	0.0521271	0.285672	0.0196521	0.0540875	0.0622579	-0.107032	-0.180916	-0.525996	-0.547801	-0.694102	-0.512899	-0.429421	-0.375247	-0.240688	-0.506185	-0.402035	-0.468568
HUXP1004F12	MAP1A	microtubule-associated protein 1A	NM_002373	4130	23	1	-0.203802	-0.0203725	-0.140095	-0.0980272	-0.0737048	-0.106619	-0.151729	-0.177371	-0.265217	-0.151898	-0.070196	-0.03513	-0.215771	-0.451485	-0.361922	-0.558136	-0.550713	-0.421328	-0.348919	-0.196795	-0.319595	-0.307147	-0.0469162
HUXP1064A11	MIPEP	mitochondrial intermediate peptidase	NM_005932	4285	23	1	-0.129283	-0.0454705	0.0248034	0.0719861	-0.201634	-0.0703893	0.0995357	-0.200299	-0.185867	0.133856	-0.0585522	0.0671142	-0.023459	-0.339385	-0.419084	-0.509555	NaN	-0.297386	-0.512885	-0.381307	-0.470747	-0.377474	-0.474318
HUXP1117C11	NDUFS5	NADH dehydrogenase (ubiquinone) Fe-S protein 5, 15kDa (NADH-coenzyme Q reductase)	NM_004552	4725	23	1	-0.144587	-0.192633	-0.120456	-0.241342	-0.15555	-0.116008	-0.0914443	0.0573997	-0.121573	0.113898	-0.196821	-0.0229004	-0.382537	-0.545132	-0.276566	-0.392654	-0.367713	-0.334312	-0.286103	-0.0399048	-0.688973	-0.0380107	-0.303146
HUXP1103G02	NPM1	nucleophosmin (nucleolar phosphoprotein B23, numatrin)	NM_199185	4869	23	1	-0.0647765	0.0487318	0.0840809	-0.140543	-0.0222313	0.0720876	0.0533569	-0.0391255	0.0662559	0.015219	0.154116	0.0396142	-0.206089	-0.236416	-0.165812	-0.691289	-0.317632	-0.382238	-0.521029	-0.380154	-0.558171	-0.403564	-0.13941
HUXP1004E07	PHB	prohibitin	NM_002634	5245	23	1	-0.0285909	0.203579	0.069378	-0.0386764	-0.037414	-0.0443395	-0.0792844	0.0503628	-0.0668854	-0.0081832	-0.00288059	-0.0920644	-0.0755633	-0.322569	-0.288714	-0.474518	-0.504286	-0.531117	-0.46061	-0.193686	-0.449849	-0.360043	-0.196857
HUXP1030B10	EXOSC9	exosome component 9	NM_005033	5393	23	1	-0.337848	0.0113639	-0.00696715	-0.199678	-0.00199958	0.0225174	0.0265263	0.0156882	-0.152851	-0.00448739	0.00595541	0.0259952	-0.312367	-0.576375	-0.427598	-0.531036	-0.489351	-0.496369	-0.355902	-0.32029	-0.610053	-0.526629	-0.193828
HUXP1006B02	PPA1	pyrophosphatase (inorganic) 1	NM_021129	5464	23	1	-0.148921	-0.0920606	-0.0880999	-0.0615007	-0.1073	-0.078502	-0.0981272	-0.225243	-0.123529	-0.0740844	-0.162782	0.151958	-0.241515	-0.431033	-0.308996	-0.618726	-0.520644	-0.504782	-0.566733	-0.096893	-0.651369	-0.348213	-0.373745
SHR020060016H01	PPARA	peroxisome proliferator-activated receptor alpha	NM_005036	5465	23	1	-0.269187	-0.123989	-0.22741	-0.198166	-0.226965	0.0395284	0.00698643	-0.0506261	-0.17148	-0.11757	-0.0221957	-0.11984	-0.233287	-0.167894	-0.462343	-0.242114	-0.386058	-0.548437	-0.211875	-0.359896	-0.447459	-0.395929	-0.371183
HUXP1204H05	PPP1CC	protein phosphatase 1, catalytic subunit, gamma isoform	NM_002710	5501	23	1	-0.094396	-0.119542	0.0614654	-0.135096	-0.111031	-0.0205198	0.0542334	-0.0775871	-0.0513469	-0.178279	-0.101023	-0.00244042	-0.420843	-0.425712	-0.33242	-0.640286	-0.586112	-0.457182	-0.517507	-0.162895	-0.569309	-0.526225	-0.264049
HUXP1012E09	PPP3CA	protein phosphatase 3 (formerly 2B), catalytic subunit, alpha isoform (calcineurin A alpha)	NM_000944	5530	23	1	-0.0156533	-0.110846	-0.180786	0.052595	0.183222	-0.168707	-0.326172	-0.354029	-0.27208	0.025091	-0.0849696	-0.125531	-0.3818	-0.310137	-0.230613	-0.622633	-0.312914	-0.0768688	-0.470206	-0.61193	-0.505453	-0.62234	-0.405992
HUXP1021H10	PRKRIR	protein-kinase, interferon-inducible double stranded RNA dependent inhibitor, repressor of (P58 repressor)	NM_004705	5612	23	1	-0.138299	-0.0885267	0.0114749	-0.277534	-0.105168	-0.118644	-0.0758158	0.00920676	-0.116767	-0.0816385	-0.152528	-0.224106	-0.287665	-0.347184	-0.245491	-0.436231	-0.403519	-0.411945	-0.392338	-0.2737	-0.406859	-0.279755	-0.332877
HUXP1067B10	RABIF	RAB interacting factor	NM_002871	5877	23	1	-0.0129391	-0.00108514	-0.0581308	0.0638465	0.113382	0.0832235	-0.165402	-0.0238165	-0.13182	-0.119534	-0.171271	-0.0783711	-0.261931	-0.523068	-0.436598	-0.435513	-0.494244	-0.471912	-0.399931	-0.310081	-0.466652	-0.410562	-0.10046
HUXP1061C11	ABCE1	ATP-binding cassette, sub-family E (OABP), member 1	NM_002940	6059	23	1	-0.299279	0.00269747	-0.027879	-0.201686	-0.162533	-0.11482	-0.0634741	-0.069709	0.0996607	0.0267173	0.0664563	-0.0273449	-0.187468	-0.359464	-0.370759	-0.680396	-0.50696	-0.378512	-0.388925	-0.23757	-0.495638	-0.452722	-0.266121
HUXP1030H09	RPL5	ribosomal protein L5	Hs.180946	6125	23	1	-0.215675	-0.212894	-0.257777	-0.123806	-0.18548	-0.01927	-0.0665924	0.149975	0.0807275	0.00403326	-0.17646	0.342752	-0.337377	-0.382056	-0.175521	-0.386344	-0.491607	-0.28499	-0.345176	-0.161239	-0.641851	-0.37532	-0.0654427
HUXP1121D10	RPL6	ribosomal protein L6	NM_001024662	6128	23	1	-0.110328	-0.0402785	0.0283356	-0.14325	-0.0559433	-0.0480152	-0.093298	-0.0227023	-0.0396277	-0.0095388	-0.0238189	0.0928128	-0.240362	-0.306585	-0.107238	-0.539489	-0.286506	-0.358402	-0.411837	-0.30479	-0.586785	-0.345464	-0.208766
HUXP1188C10	RPL41	ribosomal protein L41	NM_021104	6171	23	1	-0.169853	-0.0698619	-0.0879262	-0.25267	-0.0422827	-0.0500219	-0.120064	-0.150399	-0.23839	-0.16164	-0.299445	-0.078748	-0.215079	-0.141678	-0.268062	-0.63867	-0.434677	-0.488232	-0.2549	-0.465427	-0.656799	-0.484349	-0.0484452
SHR020061010B11	RPS6	ribosomal protein S6	NM_001010	6194	23	1	-0.182822	0.0605561	-0.156433	-0.110164	-0.241332	-0.17288	0.0773872	-0.246274	-0.176061	-0.292098	-0.191904	-0.161671	0.240385	0.0573237	-0.108353	-0.576357	-0.401173	-0.448922	-0.29398	-0.474263	-0.513822	-0.257471	0.181335
HUXP1127C06	RPS8	ribosomal protein S8	NM_001012	6202	23	1	-0.12345	-0.0964697	-0.0491534	-0.0372304	-0.0415155	-0.0643214	-0.092326	-0.0510117	-0.149574	-0.0532918	0.00969705	-0.0363127	-0.214963	-0.371585	-0.264739	-0.438209	-0.396828	-0.410902	-0.333487	-0.135538	-0.379554	-0.334993	0.00631883
HUXP1040H11	UAP1	UDP-N-acteylglucosamine pyrophosphorylase 1	NM_003115	6675	23	1	-0.0563992	0.00756528	-0.0394512	0.00518645	0.0358967	-0.0296709	-0.0333372	0.0544478	0.0168176	-0.132248	-0.282202	0.0369942	-0.211989	-0.417869	-0.336283	-0.479301	-0.330891	-0.295824	-0.195694	-0.265852	-0.481035	-0.595036	-0.239937
SHR020061008F05	SRP14	signal recognition particle 14kDa (homologous Alu RNA binding protein)	NM_003134	6727	23	1	-0.106399	-0.00431217	0.172258	-0.123693	-0.0568142	-0.055856	-0.0493533	-0.0836979	-0.060356	-0.177362	-0.155971	-0.00917996	-0.3266	-0.18792	-0.306836	-0.443876	-0.53582	NaN	-0.677367	0.0248255	-0.726611	-0.648699	-0.38015
HUXP1024H02	SRPK1	SFRS protein kinase 1	NM_003137	6732	23	1	0.0361079	-0.0664189	0.111638	-0.152617	-0.140881	0.0587862	-0.0444975	-0.293792	-0.191176	-0.292086	0.00965986	-0.28965	-0.175936	-0.255084	-0.286276	-0.553036	-0.602169	-0.863723	-0.451095	-0.284317	-0.308385	-0.544244	-0.09327
SHR020061008B06	TMPO	thymopoietin	U18270	7112	23	1	-0.148557	-0.140655	-0.0488459	-0.233245	-0.0771679	-0.0764131	0.0268555	0.167165	-0.112599	-0.0515644	-0.0240957	-0.0345277	-0.311586	-0.61906	-0.298379	-0.358417	-0.273923	NaN	-0.224255	-0.095367	-0.39869	-0.784003	-0.105021
SHR020061006G08	UBE2G2	ubiquitin-conjugating enzyme E2G 2 (UBC7 homolog, yeast)	NM_003343	7327	23	1	0.0989585	-0.0297928	-0.00908072	-0.192937	0.00649571	-0.00881486	0.0796172	-0.0266738	-0.0432841	-0.0967407	-0.238405	-0.0507108	0.0267304	-0.43903	-0.255427	-0.397422	-0.447184	-0.453212	-0.159037	-0.103012	-0.539929	-0.612143	-0.38316
HUXP1061H12	UBE2N	ubiquitin-conjugating enzyme E2N (UBC13 homolog, yeast)	NM_003348	7334	23	1	-0.161734	-0.00037536	0.0312126	-0.090096	-0.124201	0.0237314	-0.0358492	-0.0702318	-0.126889	0.0312253	-0.0407771	0.0749762	-0.183025	-0.473033	-0.168158	-0.413023	-0.385243	-0.25396	-0.179886	-0.0262763	-0.378433	-0.339037	-0.27202
HUXP1167F05	ZNF33A	zinc finger protein 33A	NM_006974	7581	23	1	-0.0468864	0.0742546	-0.240115	-0.314636	-0.318361	-0.231577	-0.0960018	0.0901978	0.0195755	-0.108312	-0.120854	-0.0238467	-0.326574	-0.301098	-0.366854	-0.410037	-0.423211	-0.0874628	-0.225067	-0.366009	-0.553598	-0.144843	-0.334038
SHR020061011G10	KCNAB1	potassium voltage-gated channel, shaker-related subfamily, beta member 1	NM_003471	7881	23	1	-0.030162	-0.146221	-0.143087	-0.254465	0.0351038	-0.0852473	-0.0425047	0.0592392	-0.104796	-0.00893312	-0.0238467	-0.0441226	-0.253187	-0.192645	-0.498069	-0.52937	-0.406424	-0.230484	-0.467007	-0.484122	-0.620296	-0.591816	-0.352881
SHR020061020C09	SORBS2	sorbin and SH3 domain containing 2	NM_021069	8470	23	1	NaN	0.0821268	-0.0122783	-0.291604	-0.0925121	0.0351894	0.0154852	-0.125531	NaN	0	-0.199672	0.00927781	-0.152899	-0.41244	-0.170885	-0.465664	NaN	NaN	-0.429393	-0.324525	-0.724366	-0.642448	-0.232834
HUXP1037E10	C19orf2	chromosome 19 open reading frame 2	NM_134447	8725	23	1	-0.14743	-0.0893619	-0.0629396	-0.071207	-0.122383	-0.0410759	-0.0798074	-0.0960696	0.0287399	0.0227201	0.00634153	0.00383186	-0.277599	-0.324172	-0.417523	-0.539179	-0.439285	-0.433231	-0.414596	-0.239383	-0.300185	-0.435819	-0.320871
HUXP1055C07	RNMT	RNA (guanine-7-) methyltransferase	NM_003799	8731	23	1	0.23502	-0.103451	-0.0212477	-0.166093	-0.0312961	-0.0201779	0.0402639	0.0462937	-0.0430687	-0.248388	0.0807313	0.113769	-0.192645	-0.22097	-0.246161	-0.424071	-0.154886	-0.287098	-0.31797	-0.358048	-0.464281	-0.430351	-0.453308
HUXP1122G04	SUCLG2	succinate-CoA ligase, GDP-forming, beta subunit	NM_003848	8801	23	1	-0.102877	-0.123328	-0.134093	-0.127756	-0.0336504	-0.23816	-0.161967	-0.188578	-0.13493	-0.0790716	-0.0362635	0.0588937	-0.254159	-0.192178	-0.385167	-0.494221	-0.250137	-0.399931	-0.402509	-0.271422	-0.469983	-0.129477	-0.186413
HUXP1075C04	PDCD5	programmed cell death 5	NM_004708	9141	23	1	-0.262824	0.110832	0.173073	0.0267123	-0.0692111	-0.0112992	-0.0609967	-0.0071144	-0.0055435	-0.0529571	-0.0622696	0.117234	-0.123953	-0.331029	-0.104337	-0.462227	-0.229606	-0.329053	-0.322398	-0.233503	-0.57122	-0.38788	-0.28042
HUXP1089C01	SDCCAG1	serologically defined colon cancer antigen 1	NM_004713	9147	23	1	-0.142854	-0.145766	-0.0461393	-0.0157079	-0.0966288	-0.138119	-0.0843469	-0.279633	-0.0743593	-0.129575	-0.127779	-0.0828151	-0.256902	-0.277261	-0.3321	-0.551594	-0.388911	-0.266611	-0.395519	0.0398093	-0.409615	-0.426156	-0.270465
HUXP1121F11	RPL23	ribosomal protein L23	NM_000978	9349	23	1	-0.132349	-0.0386259	-0.037018	-0.0526306	-0.111595	-0.0434858	-0.0451665	-0.0363193	-0.177544	-0.0265496	-0.0551024	0.0874596	-0.132878	-0.393447	0.0210821	-0.440141	-0.212778	-0.216233	-0.356923	-0.226407	-0.452101	-0.348153	-0.115437
HUXP1006E08	TM9SF2	transmembrane 9 superfamily member 2	NM_004800	9375	23	1	-0.0463228	-0.10091	0.0339102	-0.0295948	-0.0768481	-0.171078	-0.143504	-0.255606	-0.0897725	-0.124367	-0.144614	0.0368476	-0.207691	-0.281211	-0.20482	-0.356615	-0.344446	-0.312896	-0.274402	-0.186851	-0.398301	-0.439514	-0.289507
HUXP1206E09	COX5A	cytochrome c oxidase subunit Va	NM_004255	9377	23	1	-0.107217	-0.0371341	0.0121075	-0.142014	-0.0111474	-0.0472504	-0.0593091	-0.18793	-0.0509363	-0.0454649	-0.117648	0.0754896	-0.207032	-0.36354	-0.341215	-0.396038	-0.552441	-0.404169	-0.384431	-0.215917	-0.62276	-0.513413	-0.222781
HUXP1166F01	GOSR1	golgi SNAP receptor complex member 1	NM_001007025	9527	23	1	-0.150825	0.293264	-0.301002	-0.0170511	-0.207691	-0.467923	-0.313417	-0.0768156	0.126591	0.02284	0.237266	-0.0695409	-0.37679	-0.183222	-0.134843	-0.181414	-0.274757	-0.417853	-0.293408	-0.584963	-0.338525	-0.367209	-0.280108
HUXP1131G05	VPS26A	vacuolar protein sorting 26 homolog A (yeast)	NM_004896	9559	23	1	-0.157798	0.136614	-0.0452056	-0.16853	-0.135849	-0.0927501	-0.126461	-0.165296	0.0835541	-0.0312874	0.116324	-0.0328314	-0.16914	-0.204589	-0.147723	-0.447224	-0.236003	-0.229059	-0.29831	-0.24763	-0.481817	-0.683065	-0.336308
HUXP1074F08	ABCG1	ATP-binding cassette, sub-family G (WHITE), member 1	NM_207174	9619	23	1	-0.291135	-0.100375	-0.202896	-0.127504	0.00879695	-0.229482	-0.105869	-0.123148	0.0116347	-0.0762356	-0.214125	0.0194962	-0.136948	-0.587177	-0.246018	-0.226276	-0.318682	-0.433897	-0.151118	-0.199715	-0.685707	-0.457303	-0.0397097
HUXP1108B05	HNRPR	heterogeneous nuclear ribonucleoprotein R	NM_005826	10236	23	1	-0.101598	-0.121068	0.0440552	-0.139302	-0.183998	-0.101057	-0.0007427	-0.14651	-0.00939592	-0.16978	-0.103896	-0.202579	-0.248483	-0.523747	-0.258179	-0.537968	-0.352483	-0.198414	-0.370121	-0.149395	-0.505705	-0.477868	-0.437489
HUXP1046F11	TMEM5	transmembrane protein 5	NM_014254	10329	23	1	-0.0611115	-0.0197633	0.0668181	-0.0497026	0.0100188	0.0936591	-0.134542	-0.0879965	-0.281664	-0.0339473	-0.0519521	-0.00838779	-0.307931	-0.509411	-0.565063	-0.532304	-0.482063	-0.386125	-0.287577	-0.133712	-0.539366	-0.474243	-0.300903
HUXP1132A04	TINP1	TGF beta-inducible nuclear protein 1	NM_014886	10412	23	1	-0.144019	-0.0404356	-0.120851	-0.234086	-0.15976	-0.135601	-0.0940134	-0.128786	-0.161957	-0.120334	0.0179413	0.000715445	-0.160922	-0.213562	-0.381109	-0.59951	-0.330422	-0.458735	-0.426286	-0.27792	-0.442864	-0.572736	-0.144463
HUXP1047E10	PRDX4	peroxiredoxin 4	NM_006406	10549	23	1	0.0967332	-0.0990988	-0.0627154	-0.110023	-0.13493	-0.0497642	-0.0614356	-0.081286	-0.127269	-0.00365702	-0.196191	0.0709612	-0.328597	-0.539609	-0.331482	-0.515746	-0.617422	-0.399915	-0.445962	-0.149143	-0.604763	-0.430957	-0.295936
HUXP1113A09	PAICS	phosphoribosylaminoimidazole carboxylase, phosphoribosylaminoimidazole succinocarboxamide synthetase	NM_006452	10606	23	1	-0.342196	-0.0935392	0.00794875	-0.0349365	-0.147241	-0.110983	-0.163698	-0.0833139	-0.0282209	-0.0864351	-0.113019	0.0936048	-0.25586	-0.462095	-0.17757	-0.555287	-0.304798	-0.275589	-0.35807	-0.173462	-0.685742	-0.532986	-0.392177
SHR020060005C06	CTCF	CCCTC-binding factor (zinc finger protein)	NM_006565	10664	23	1	-0.132507	0.157618	0.0213737	NaN	-0.0764346	-0.204044	-0.00582124	0	-0.00525573	0.032085	0.145989	-0.0834943	-0.11949	-0.309773	-0.19592	NaN	-0.355937	-0.243835	-0.206672	NaN	-0.326501	NaN	NaN
HUXP1104C09	CLPX	ClpX caseinolytic peptidase X homolog (E. coli)	Hs.113823	10845	23	1	-0.184679	0.132873	-0.210035	-0.0633887	-0.226592	-0.114257	-0.281514	-0.303513	-0.0853915	-0.056338	-0.0423463	-0.143836	-0.178092	-0.422092	-0.408932	-0.391534	-0.368284	-0.572788	-0.54119	-0.204014	-0.685267	-0.584963	-0.427862
HUXP1053G08	CBX1	chromobox homolog 1 (HP1 beta homolog Drosophila )	NM_006807	10951	23	1	-0.213595	0.202381	0.0676387	-0.0288961	-0.0551416	-0.0718327	-0.209308	-0.108168	-0.114005	-0.00503559	-0.185432	-0.0207089	-0.189955	-0.565979	-0.179056	-0.240359	-0.317341	-0.0315701	-0.192989	-0.152476	-0.635148	-0.195991	0.00279321
HUXP1091B03	PROSC	proline synthetase co-transcribed homolog (bacterial)	NM_007198	11212	23	1	-0.233199	0.0332944	0.157297	-0.0910645	-0.16372	-0.157901	-0.184425	-0.407175	-0.108524	-0.047678	-0.0150439	0.0904905	-0.171766	-0.448708	-0.179169	-0.39051	-0.21874	-0.237205	-0.312555	-0.184889	-0.476791	-0.397909	-0.498772
HUXP1210G10	RPL35	ribosomal protein L35	NM_007209	11224	23	1	-0.0320343	0.0345978	-0.0700047	0.0200663	-0.00331618	0.025563	-0.0261531	0.0271661	0.0617667	-0.0542038	-0.183968	-0.0785325	-0.211253	-0.357667	-0.264207	-0.454475	-0.486843	-0.400788	-0.452212	-0.351334	-0.444242	-0.306746	-0.0367134
HUXP1038G02	ENPP4	ectonucleotide pyrophosphatase/phosphodiesterase 4 (putative function)	NM_014936	22875	23	1	-0.174897	-0.111907	-0.146701	-0.178107	0.0313165	-0.0662706	-0.167274	-0.0304854	-0.141358	-0.197413	-0.211562	-0.137678	-0.327404	-0.235006	-0.162961	-0.431577	-0.319907	-0.336366	-0.541093	-0.362464	-0.524156	-0.3433	-0.126112
HUXP1062B10	BTBD3	BTB (POZ) domain containing 3	NM_014962	22903	23	1	NaN	-0.0790716	0.0792889	-0.0463929	0.0634254	NaN	-0.137504	-0.243557	NaN	0.247928	-0.0554951	0.096676	-0.209792	-0.615177	NaN	-0.379414	-0.100527	NaN	-0.253757	-0.20482	-0.531523	-0.0703893	-0.431716
HUXP1106C05	XPO7	exportin 7	Hs.172685	23039	23	1	-0.0867455	0.00952976	-0.106464	-0.198456	-0.025829	-0.106689	-0.135088	-0.164916	-0.176427	-0.180946	-0.0688494	0.0437951	-0.241629	-0.352006	-0.252128	-0.344519	-0.406506	-0.24591	-0.157996	-0.139592	-0.451926	-0.311236	-0.259018
HUXP1105H11	SYNE1	spectrin repeat containing, nuclear envelope 1	NM_033071	23345	23	1	-0.18563	-0.134301	0.0124909	0.0127862	0.0104924	0.0303736	-0.0634254	-0.0271574	-0.280837	-0.0178113	-0.30441	-0.0421417	-0.160066	-0.636453	-0.343795	-0.492625	-0.486399	-0.424189	-0.309635	-0.133166	-0.498806	-0.436306	-0.15249
HUXP1127G10	WDR40A	WD repeat domain 40A	NM_015397	25853	23	1	-0.0827144	0.151625	-0.0546771	-0.184894	-0.0555378	-0.0760289	-0.184588	-0.305584	-0.236819	-0.0563036	0.0841763	0.0376473	-0.019145	-0.228441	-0.381297	-0.396197	-0.573991	-0.390584	-0.267187	-0.322471	-0.524573	-0.607085	-0.341081
HUXP1124A09	SERBP1	SERPINE1 mRNA binding protein 1	NM_001018067	26135	23	1	-0.058045	0.154366	-0.0356941	-0.0186601	-0.0245307	0.0795647	-0.114119	-0.222846	-0.0938374	0.0592701	0.163072	-0.0297191	-0.18966	-0.269277	-0.393049	-0.687773	-0.593253	-0.517834	-0.533416	-0.252957	-0.323377	-0.392742	-0.233788
HUXP1059H03	HSPB8	heat shock 22kDa protein 8	NM_014365	26353	23	1	-0.0333862	0.0109118	-0.0293772	-0.0193254	-0.0260539	0.00243083	-0.0441113	-0.0765416	-0.108624	-0.0373216	-0.0163944	-0.040642	-0.290354	-0.42017	-0.475841	-0.567628	-0.269888	-0.408985	-0.380949	-0.320811	-0.661973	-0.567652	-0.324525
HUXP1008H08	PLEK2	pleckstrin 2	NM_016445	26499	23	1	-0.230708	0.0747406	-0.217357	-0.195111	-0.00933786	-0.00406966	-0.0118013	0.0364549	0.19179	0.0459862	-0.0780025	-0.0544478	-0.471375	-0.645585	-0.472446	-0.746293	-0.465397	-0.503357	-0.294807	-0.127336	-0.486782	-0.503386	-0.217216
SHR020060019D04	PELP1	proline, glutamic acid and leucine rich protein 1	NM_014389	27043	23	1	0.0658879	0.0140889	0.0980321	-0.116491	0.0085115	0.0484267	-0.0665977	0.0671142	-0.00224195	-0.0516842	-0.179549	-0.20138	-0.147127	-0.366203	-0.245056	-0.13983	-0.63743	NaN	-0.201112	-0.10425	-0.518754	-0.266344	-0.322488
HUXP1208D02	DAPP1	dual adaptor of phosphotyrosine and 3-phosphoinositides	NM_014395	27071	23	1	-0.0670548	-0.0276715	0.144906	-0.126387	-0.00562894	-0.0393081	-0.0111571	-0.115219	-0.00450491	-0.186134	-0.079782	-0.187258	-0.305988	-0.283666	-0.263034	-0.546253	-0.369337	-0.459319	-0.329349	-0.291996	-0.554527	-0.643572	-0.3235
SHR020060013D03	VENTX	VENT homeobox homolog (Xenopus laevis)	NM_014468	27287	23	1	-0.10652	-0.0223363	-0.0884509	-0.28102	-0.158489	-0.0459754	0.0505669	-0.190331	0.407658	0.027332	0.184651	0.00385233	-0.359927	-0.00690286	-0.0883951	-0.318661	-0.252294	-0.493989	-0.28287	-0.286236	-0.4885	-0.112475	-0.149545
HUXP1101E10	EML4	echinoderm microtubule associated protein like 4	NM_019063	27436	23	1	-0.14901	-0.149447	-0.170933	-0.129063	-0.105845	-0.0263113	-0.121518	-0.141503	-0.111893	-0.0303736	0.0180339	-0.0671142	-0.102714	-0.336551	-0.274033	-0.504963	-0.380708	-0.490986	-0.253494	-0.354594	-0.523323	-0.516483	-0.465472
HUXP1159B04	MRPL13	mitochondrial ribosomal protein L13	NM_014078	28998	23	1	-0.179494	-0.210456	-0.101341	-0.23816	-0.182443	-0.140343	-0.176472	-0.286621	-0.195973	-0.150215	-0.0967532	0.0122436	-0.169301	-0.336162	-0.474909	-0.385677	-0.25745	-0.42068	-0.328294	-0.299118	-0.553317	-0.550635	-0.291065
HUXP1083C08	MED4	mediator of RNA polymerase II transcription, subunit 4 homolog (S. cerevisiae)	NM_014166	29079	23	1	-0.096676	-0.0848084	-0.107688	-0.185803	-0.184809	-0.0978473	-0.0814981	-0.0085115	-0.0229916	0.070718	0.0062726	0.017702	-0.192126	-0.425427	-0.128802	-0.385891	-0.222392	-0.351074	-0.322413	-0.273531	-0.575895	-0.390694	-0.475174
HUXP1021G10	METTL5	methyltransferase like 5	NM_014168	29081	23	1	-0.166834	-0.180477	-0.0740481	-0.34196	-0.179756	-0.0923971	-0.146841	-0.310042	-0.120229	-0.0514622	0.0659976	0.202697	-0.014621	-0.218632	-0.500234	-0.564663	-0.503876	-0.522298	-0.341179	-0.160077	-0.317915	-0.504473	-0.0876622
HUXP1180E10	CNOT7	CCR4-NOT transcription complex, subunit 7	NM_013354	29883	23	1	-0.273796	-0.139878	0.0221587	-0.0995357	-0.0882006	-0.0174874	0.0981044	-0.0107664	0.0665124	-0.148785	-0.0566802	0.11382	-0.378156	-0.333889	-0.255141	-0.669746	-0.419255	-0.464281	-0.409512	-0.512713	-0.533794	-0.360098	-0.376274
HUXP1040H03	PIK3R4	phosphoinositide-3-kinase, regulatory subunit 4, p150	NM_014602	30849	23	1	-0.13852	-0.112841	-0.0906025	-0.143492	0.0634254	-0.111508	-0.0931094	-0.202044	-0.222392	-0.0619277	0.00984779	-0.221253	-0.270648	-0.53952	-0.443607	-0.300081	-0.301656	-0.247928	-0.168754	-0.298081	-0.448204	-0.545741	-0.402965
HUXP1204H10	NSDHL	NAD(P) dependent steroid dehydrogenase-like	NM_015922	50814	23	1	0.0109711	0.0252006	0.0126	-0.419017	0.111989	-0.00356662	0.00355782	-0.0812238	-0.197446	0.0409303	-0.0647849	0.0256258	-0.105645	-0.103691	-0.174748	-0.397422	-0.159478	-0.784271	-0.38807	-0.297328	-0.458854	-0.312523	-0.464668
HUXP1086G05	TXNDC12	thioredoxin domain containing 12 (endoplasmic reticulum)	NM_015913	51060	23	1	0.00870845	-0.045276	0.0105552	-0.176274	-0.200913	-0.0605862	-0.220667	-0.0630998	-0.0534051	-0.141044	-0.126805	0.111072	-0.00315688	-0.499183	-0.197503	-0.233168	-0.16726	-0.459432	-0.515846	-0.458015	-0.374909	-0.492631	-0.114752
HUXP1059C01	ZNF639	zinc finger protein 639	NM_016331	51193	23	1	-0.229868	0.17585	-0.0647057	-0.473601	-0.10188	0.0548619	0.0964628	0.211504	-0.118181	-0.350186	-0.118877	0.0225426	-0.273501	-0.304209	-0.350186	-0.434312	-0.2205	NaN	-0.243926	NaN	-0.625709	-0.498806	-0.234465
HUXP1051B12	RWDD1	RWD domain containing 1	NM_015952	51389	23	1	-0.230177	-0.031425	-0.0601843	-0.131153	-0.218285	-0.117774	-0.234187	-0.142372	-0.21427	-0.081284	-0.00733265	0.00511206	-0.152003	-0.208204	-0.120866	-0.457806	-0.356386	-0.411448	-0.400167	-0.248309	-0.658309	-0.5622	-0.115821
HUXP1067E10	PIGT	phosphatidylinositol glycan anchor biosynthesis, class T	NM_015937	51604	23	1	-0.077561	-0.0282223	-0.02549	-0.0482039	-0.0839784	-0.0510742	-0.0491972	0.0938952	0.0341819	0.0570497	-0.129525	0.136573	-0.207841	-0.39899	-0.255708	-0.439259	-0.448226	-0.374275	-0.211279	-0.205917	-0.558857	-0.407124	-0.130208
HUXP1073C11	LUC7L2	LUC7-like 2 (S. cerevisiae)	NM_197964	51631	23	1	-0.0373864	-0.03433	-0.203391	0.0898528	0.0986076	-0.0262657	-0.107313	-0.169631	0.0390696	-0.0838316	-0.193553	-0.180723	-0.186276	-0.3298	-0.388565	-0.473931	-0.39899	-0.516625	-0.333472	-0.244385	-0.479933	-0.497679	-0.14321
HUXP1108B08	TAS2R5	taste receptor, type 2, member 5	NM_003143	54429	23	1	-0.0196808	-0.191198	0.25488	-0.266591	-0.00199879	0.0010553	-0.0112533	0.0428881	0.15827	0.0286465	-0.0201622	-0.0489803	-0.219628	-0.471962	-0.189085	-0.481599	NaN	-0.26365	-0.372699	-0.127327	-0.480626	-0.0211056	-0.217014
HUXP1168B10	MRPS21	mitochondrial ribosomal protein S21	NM_018997	54460	23	1	0.0171751	-0.0580608	-0.0530312	0.0237608	-0.000926884	0.121788	-0.0224986	-0.00625899	0.12147	0.0220652	-0.132195	0.132028	-0.254091	-0.380945	-0.310875	-0.393715	-0.314222	-0.313836	-0.318591	-0.0327453	-0.542898	-0.23803	-0.0667423
HUXP1037H10	CRLS1	cardiolipin synthase 1	NM_019095	54675	23	1	-0.125922	0.0388947	0.050067	0.00165827	-0.0715533	-0.146264	-0.118441	-0.181404	-0.119926	0.0219983	-0.0968264	0.0888744	-0.175367	-0.477141	-0.333155	-0.466535	-0.417897	-0.361739	-0.353725	-0.324793	-0.626278	-0.538669	-0.33331
HUXP1125D02	C14orf130	chromosome 14 open reading frame 130	NM_018108	55148	23	1	-0.0229459	0.179051	-0.0118741	0.0549665	0.0415193	0.0992096	0.0450097	-0.159048	-0.0288811	0.338451	-0.0407856	-0.226885	-0.20386	-0.389293	-0.26942	-0.438345	-0.228886	-0.205511	-0.21365	-0.35178	-0.564933	-0.378	-0.393693
HUXP1002A05	TMEM33	transmembrane protein 33	NM_018126	55161	23	1	-0.0374235	-0.0152668	-0.0132109	0.221228	-0.101396	-0.157541	-0.255001	-0.0478947	-0.0344027	0.122057	-0.020283	0.217281	-0.045468	-0.257255	-0.31726	-0.327298	-0.734579	-0.176447	NaN	-0.0227201	-0.535105	-0.354843	-0.108167
HUXP1023H01	SHQ1	SHQ1 homolog (S. cerevisiae)	NM_018130	55164	23	1	-0.127345	0.0472353	-0.108199	-0.232206	0.101598	-0.0762356	-0.0989242	-0.0823349	-0.323742	-0.050836	0.105463	-0.225439	-0.271202	-0.207189	-0.234465	-0.415037	-0.178765	-0.525584	-0.168566	-0.310669	-0.628791	-0.535332	-0.371129
HUXP1034G08	PGM2	phosphoglucomutase 2	NM_018290	55276	23	1	-0.0684317	-0.0741176	-0.140373	0.0108678	-0.155234	-0.1491	-0.106539	0.037556	-0.143982	-0.207069	-0.06866	0.133954	-0.270789	-0.392708	-0.401554	-0.513771	-0.495236	-0.22036	-0.139275	0.0709478	-0.279878	-0.335734	-0.19346
HUXP1206B04	KIAA1333	KIAA1333	NM_017769	55632	23	1	-0.0826591	0.0480264	0.0198155	-0.200245	-0.0406141	0.0860648	0.0509494	-0.0204418	0.0483444	-0.148099	-0.0216747	-0.156276	-0.349054	-0.350576	-0.336102	-0.449656	-0.30498	-0.37151	-0.231896	-0.286495	-0.60032	-0.552673	-0.382737
HUXP1055D05	CACNA2D3	calcium channel, voltage-dependent, alpha 2/delta 3 subunit	NM_018398	55799	23	1	-0.222392	0.0324215	0.0429521	-0.108641	-0.0401281	-0.104337	-0.294061	-0.0216138	-0.0598715	-0.0995357	-0.287232	0.0655007	-0.238985	-0.417121	-0.42303	-0.247381	-0.388333	-0.467889	-0.197192	-0.15585	-0.614109	-0.770156	-0.350907
HUXP1056B05	TMEM126B	transmembrane protein 126B	NM_018480	55863	23	1	-0.169186	-0.0804386	0.0413245	-0.0296808	-0.155164	-0.137192	-0.181133	-0.412178	-0.236426	-0.140544	-0.119138	0.114538	-0.155566	-0.36764	-0.288569	-0.472068	-0.377847	-0.34879	-0.328542	-0.222392	-0.366151	-0.500026	-0.141155
HUXP1063A09	NKRF	NF-kappaB repressing factor	NM_017544	55922	23	1	-0.0310269	0.153835	0.108748	0	-0.0467165	0.0251786	-0.00921853	-0.053242	-0.123148	-0.0117772	0.119961	0.039801	-0.169725	-0.0865368	-0.261741	-0.533085	-0.363812	-0.48433	-0.411978	-0.237039	-0.377235	-0.359542	-0.327333
HUXP1074E01	PPAN	peter pan homolog (Drosophila)	NM_018381	56342	23	1	-0.176665	-0.0256048	-0.178122	-0.195606	-0.0225678	-0.027879	-0.152395	0.0231763	-0.078712	-0.197537	-0.168662	0.0330824	-0.13021	-0.274415	-0.281068	-0.346846	-0.518873	-0.4975	-0.318391	-0.403754	-0.484874	-0.364233	-0.152003
HUXP1061B10	TBC1D14	TBC1 domain family, member 14	NM_020773	57533	23	1	-0.0602175	0.00445506	0.0521827	0.0376704	0.118905	0.0547658	-0.00779135	-0.145117	-0.136236	-0.0298352	-0.0760667	-0.109624	-0.226536	-0.602774	-0.375509	-0.489966	-0.422815	-0.449656	-0.0549357	-0.13852	-0.546282	-0.463247	-0.433185
HUXP1034G07	TAOK1	TAO kinase 1	AK024376	57551	23	1	-0.132556	-0.0757871	-0.221127	0.0591131	-0.237039	-0.0504898	-0.195155	-0.167945	-0.111893	-0.148863	-0.0969765	0.0376923	-0.333346	-0.34519	-0.460047	-0.765535	-0.542793	-0.305987	-0.151701	0.0669165	-0.430101	-0.415037	-0.291426
HUXP1210D06	UBL5	ubiquitin-like 5	NM_024292	59286	23	1	-0.0539219	-0.0663646	0.0169994	-0.0305027	-0.0805702	-0.0702813	-0.110758	-0.0580947	0.0800739	-0.0554737	-0.307848	0.0109439	-0.201416	-0.551063	-0.235815	-0.428061	-0.344347	-0.270566	-0.243402	-0.0705303	-0.616133	-0.363173	0.0232611
HUXP1155C07	NSD1	nuclear receptor binding SET domain protein 1	NM_172349	64324	23	1	0.00712443	0.174679	-0.217098	-0.0568312	-0.121679	-0.216423	-0.413251	0.0222528	0.104337	-0.124328	0.0204641	-0.305808	-0.314381	-0.0381832	-0.518873	-0.225926	-0.313158	-0.135515	-0.280736	-0.474372	-0.783682	-0.438689	0.0536879
HUXP1043G11	GMCL1	germ cell-less homolog 1 (Drosophila)	NM_178439	64395	23	1	-0.0721498	-0.121052	-0.120031	0.0545458	0	-0.0356239	-0.11763	-0.238787	-0.152003	-0.0681715	0.219075	-0.123735	-0.403316	-0.36257	-0.47379	-0.609846	-0.457798	-0.406854	-0.430523	-0.3016	-0.443366	-0.340744	-0.207069
HUXP1009H01	HIAT1	hippocampus abundant transcript 1	NM_033055	64645	23	1	-0.100527	0.0577155	-0.134301	-0.0422657	-0.00904514	0.0591958	-0.0683371	-0.0395284	-0.180938	-0.0991332	0.0494122	-0.0305344	-0.225067	-0.303781	-0.271546	-0.566872	-0.3526	-0.409984	-0.373107	-0.421329	-0.630544	-0.51862	-0.363043
HUXP1061E02	ANAPC1	anaphase promoting complex subunit 1	NM_022662	64682	23	1	-0.0274807	0.171556	0.166461	0.0975553	-0.0458037	-0.265461	-0.280108	-0.433719	-0.141893	-0.172389	-0.0109711	0.00331273	-0.185662	-0.431339	-0.488578	-0.519138	-0.446334	-0.469485	-0.385518	-0.215844	-0.416143	-0.378512	-0.376405
HUXP1001G01	ARV1	ARV1 homolog (S. cerevisiae)	NM_022786	64801	23	1	-0.0259952	-0.0216138	-0.138328	0.228624	0.0770762	0.117836	-0.163886	-0.149576	-0.0466932	-0.0838316	0.0591958	0.207096	-0.304087	-0.371448	-0.326981	-0.396659	-0.264703	-0.0452293	-0.145605	0.0137401	-0.425764	-0.295456	-0.236606
HUXP1168C04	C7orf24	chromosome 7 open reading frame 24	NM_024051	79017	23	1	-0.0220973	0.0532708	0.000657414	-0.215399	-0.0644448	0.0248961	-0.0693419	-0.0262315	0.0644049	0.0630304	0.146699	0.0109246	-0.151184	-0.415312	-0.303907	-0.536828	-0.577815	-0.32681	-0.495087	-0.274912	-0.399431	-0.412151	-0.0870488
HUXP1072B09	FASTKD3	FAST kinase domains 3	NM_024091	79072	23	1	-0.264158	0.112403	-0.136204	-0.0421871	-0.179108	-0.142019	-0.224999	-0.501108	-0.00799279	0.0685643	0	0.0412882	-0.0641303	-0.487938	-0.352516	-0.577468	-0.301002	-0.127005	-0.170747	-0.0937465	-0.470766	-0.311708	-0.342543
HUXP1031H07	TXNDC5	thioredoxin domain containing 5	NM_022085	81567	23	1	-0.178726	0.00324566	-0.0306316	0.065213	-0.120576	0.0208517	0.0502194	0.0146468	0.0897099	0.0198002	0.0461933	0.0977236	-0.232509	-0.485556	-0.321647	-0.448094	-0.422833	-0.407997	-0.432938	-0.191119	-0.639047	-0.247372	-0.0297127
HUXP1001B08	SEH1L	SEH1-like (S. cerevisiae)	NM_001013437	81929	23	1	-0.171005	-0.107124	0.00458727	-0.0988629	-0.202243	-0.0658021	-0.107465	0.100499	-0.00461663	-0.0394147	-0.139275	0.0324215	-0.375361	-0.6516	-0.387452	-0.704848	-0.456858	-0.245577	-0.365222	-0.198671	-0.724861	-0.37404	-0.623974
HUXP1008G10	RIOK1	RIO kinase 1 (yeast)	NM_031480	83732	23	1	-0.18366	0.0555256	0.0320019	-0.127084	-0.155651	-0.176549	-0.128324	-0.0487824	0.0688951	-0.0587224	-0.110686	0.258096	-0.142775	-0.346963	-0.317111	-0.597526	-0.549773	-0.401922	-0.262004	-0.193083	-0.440058	-0.407089	-0.230708
HUXP1046B03	WDR75	WD repeat domain 75	NM_032168	84128	23	1	-0.263034	0.183712	-0.0441543	-0.177204	0.325623	-0.252387	-0.20579	-0.136851	-0.076103	-0.0703893	0.00842862	-0.123148	-0.266708	-0.273957	-0.39984	-0.633745	-0.612977	-0.473931	-0.391398	-0.257899	-0.560974	-0.411631	-0.353879
HUXP1188E08	C12orf62	chromosome 12 open reading frame 62	NM_032901	84987	23	1	-0.0589829	-0.0901811	-0.108376	0.0870567	0.00739845	0.0371808	-0.0848176	-0.0568771	0.0531872	-0.0505781	-0.294101	0.0571439	-0.20067	-0.330704	-0.417106	-0.378888	-0.412454	-0.512156	-0.452896	-0.408384	-0.448901	-0.120681	-0.233457
HUXP1107B11	TMEM55B	transmembrane protein 55B	NM_144568	90809	23	1	0.0377032	0.0653537	0.0868322	0.0293523	0.0341939	0.0264491	-0.0496959	-0.0437868	0.03046	0.0392113	0.0222446	-0.0106512	-0.100132	-0.348368	-0.27206	-0.373375	-0.403124	-0.250379	-0.219188	-0.153234	-0.515349	-0.564864	-0.222103
HUXP1113A06	CCDC34	coiled-coil domain containing 34	AF155108	91057	23	1	-0.0657242	0.122459	0.123426	-0.127362	-0.0727923	-0.158841	-0.053695	0.00335901	0.00201353	0.128483	0.0258143	-0.0290189	-0.203594	-0.520999	-0.367831	-0.634545	-0.526198	-0.482114	-0.521797	-0.451577	-0.709872	-0.452383	-0.578499
HUXP1013D03	CHMP7	CHMP family, member 7	NM_152272	91782	23	1	-0.121527	0.0186782	-0.065376	0.032873	-0.0269311	-0.0116035	-0.1734	-0.377288	-0.41599	-0.00375702	0.0737304	0.0292808	-0.269721	-0.390652	-0.395004	-0.338453	-0.303878	-0.309205	-0.11778	-0.149258	-0.596914	-0.59561	-0.194206
HUXP1058B02	PIGM	phosphatidylinositol glycan anchor biosynthesis, class M	NM_145167	93183	23	1	-0.0801703	-0.0283446	-0.0205613	-0.303069	0.0191088	0.060754	-0.178092	-0.335867	-0.0909085	-0.0418202	-0.11832	-0.0792267	-0.210767	-0.505235	-0.373458	-0.366539	-0.29956	-0.378512	-0.17818	-0.194011	-0.473252	-0.437209	-0.579226
HUXP1124A06	TMEM123	transmembrane protein 123	NM_052932	114908	23	1	-0.125461	0.0432251	-0.216602	-0.288724	-0.244601	-0.207051	-0.00516787	-0.0367878	0.0345277	-0.226936	-0.048997	-0.346032	-0.286996	-0.174451	-0.364507	-0.628914	-0.459729	-0.432714	-0.386268	-0.286112	-0.581384	-0.572118	-0.278555
HUXP1103H08	S100A16	S100 calcium binding protein A16	NM_080388	140576	23	1	-0.175356	0.0299698	-0.049582	-0.144597	-0.100543	0.0113823	-0.031413	0.0303736	-0.0240455	0.0560661	-0.0971758	-0.125896	0.154627	-0.270314	-0.520832	-0.682518	-0.465152	-0.5738	-0.38534	-0.279319	-0.672214	-0.521537	-0.0714718
HUXP1007G08	C9orf19	chromosome 9 open reading frame 19	NM_022343	152007	23	1	-0.20678	-0.0235868	-0.0623965	0.0246621	-0.0637524	-0.0289127	-0.047678	-0.242201	-0.0892673	-0.0311946	-0.0636383	0.133159	-0.274481	-0.513294	-0.261249	-0.430516	-0.466176	-0.315929	-0.313023	-0.0762836	-0.524842	-0.280108	-0.163709
HUXP1072A01	CLEC14A	C-type lectin domain family 14, member A	NM_175060	161198	23	1	-0.224966	-0.0371986	0.027745	-0.0744499	-0.103711	-0.0868048	-0.289507	-0.258068	-0.189478	-0.141356	-0.0931094	0.213332	0.0120981	-0.324816	-0.318754	-0.427919	-0.392739	-0.36257	-0.257053	-0.131951	-0.420332	-0.429004	-0.125531
HUXP1088A03	TWISTNB	TWIST neighbor	NM_001002926	221830	23	1	-0.0436112	0.0889402	-0.127484	-0.336428	-0.166551	0	-0.0309698	0.120669	0.0955777	0.104697	0.129538	-0.147525	-0.343441	-0.236858	-0.398369	-0.559232	-0.305413	-0.178597	-0.405179	-0.125877	-0.521637	-0.129283	-0.279649
HUXP1166E09	LOC284361	hematopoietic signal peptide-containing	NM_206538	284361	23	1	-0.0980977	-0.0816004	-0.13628	-0.0615743	-0.0800909	-0.0258297	-0.0648376	-0.10221	-0.157263	-0.205528	-0.210302	-0.0547074	-0.114081	-0.51822	-0.291236	-0.426852	-0.250758	-0.223058	-0.196327	-0.122033	-0.708321	-0.333552	0.0882454
HUXP1010B06	AEBP1	AE binding protein 1	NM_001129	165	24	1	-0.26096	-0.119341	-0.205883	-0.0461292	-0.0619277	-0.175707	-0.0945176	0.176157	-0.520514	-0.484679	-0.337315	-0.352955	-0.0041338	-0.193275	-0.120294	-0.232173	-0.0113153	-0.499987	-0.241647	-0.123539	-0.197537	-0.465838	-0.417051
HUXP1064F11	SLC25A4	solute carrier family 25 (mitochondrial carrier; adenine nucleotide translocator), member 4	NM_001151	291	24	1	-0.254814	-0.659771	0.208399	-0.264213	-0.102848	-0.130787	-0.30227	-0.29956	-0.249172	-0.169925	NaN	0.116514	-0.148445	-0.321928	-0.192645	-0.188204	-0.452512	-0.190943	-0.329568	-0.435215	-0.268996	-0.20553	-0.0532748
SHR020061009E04	RHOB	ras homolog gene family, member B	NM_004040	388	24	1	-0.0948826	-0.0596128	-0.176962	-0.173536	-0.0603879	-0.0341988	-0.0915281	-0.159941	0.0687128	-0.200697	-0.284977	0.0497939	-0.310691	-0.209319	-0.156298	-0.256014	-0.436592	NaN	-0.117224	-0.198696	-0.516976	-0.329104	-0.335755
HUXP1071F05	ARL3	ADP-ribosylation factor-like 3	NM_004311	403	24	1	-0.154034	-0.172316	-0.0977752	-0.11392	-0.145759	-0.105795	-0.203092	-0.261867	-0.145361	-0.0960269	-0.255042	-0.210114	-0.438218	-0.502748	-0.423075	-0.291302	-0.418501	-0.172837	-0.182105	-0.228973	-0.242075	-0.321928	-0.0501628
SHR020061011A07	ATOX1	ATX1 antioxidant protein 1 homolog (yeast)	NM_004045	475	24	1	-0.121306	-0.178243	-0.202705	-0.223621	-0.205287	-0.215729	-0.282347	-0.0604208	-0.253459	-0.247425	-0.230089	-0.0899314	-0.30228	-0.340485	-0.32653	-0.379704	-0.524702	-0.330809	-0.265554	-0.217905	-0.197165	-0.327346	-0.171717
HUXP1006D06	BAI3	brain-specific angiogenesis inhibitor 3	NM_001704	577	24	1	-0.0257303	-0.183084	-0.0888483	-0.150467	-0.062061	0.0237682	-0.0351894	0.0895221	-0.10164	-0.13217	-0.215956	-0.218001	-0.118016	-0.374558	-0.32408	-0.156378	-0.275431	-0.32052	-0.216856	0.0336831	-0.330447	-0.339916	-0.362165
SHR020060020C01	BLM	Bloom syndrome	NM_000057	641	24	1	-0.101283	-0.114548	-0.187279	-0.230613	-0.108404	-0.0558912	0.0190667	-0.165851	0.0053832	-0.123211	-0.0433274	0.0318489	-0.0841551	-0.372659	-0.0876992	-0.0988629	-0.17148	-0.406257	-0.53579	-0.140863	-0.445626	-0.261585	-0.263457
HUXP1197A03	BNIP2	BCL2/adenovirus E1B 19kDa interacting protein 2	Hs.283454	663	24	1	-0.0856561	-0.142647	-0.321012	-0.378741	-0.177832	-0.108593	-0.124782	-0.101052	-0.314192	-0.233045	-0.11842	-0.171219	-0.401675	-0.516495	-0.289692	-0.481894	-0.417757	-0.259494	-0.145541	-0.0252794	-0.182508	-0.196764	-0.234352
HUXP1083F04	BPGM	2,3-bisphosphoglycerate mutase	NM_199186	669	24	1	-0.120925	-0.447459	0.0795673	-0.0777024	-0.0855757	-0.01543	0.0142139	0.0584956	NaN	-0.0943274	-0.211107	-0.147557	-0.294447	-0.408806	-0.201634	-0.111968	-0.25292	-0.0911479	-0.115477	-0.181607	-0.156628	-0.247218	-0.134426
HUXP1067B03	CCNB1	cyclin B1	NM_031966	891	24	1	-0.135471	-0.128823	-0.0726336	0.0171118	-0.00325951	0.129846	0.114223	-0.125751	-0.107986	-0.173514	-0.132145	-0.0892713	-0.41509	-0.296824	-0.168168	-0.247399	-0.219042	-0.199892	-0.258508	-0.316664	-0.546803	-0.350054	-0.160388
HUXP1034F08	CD79A	CD79a molecule, immunoglobulin-associated alpha	NM_001783	973	24	1	-0.139725	-0.187388	-0.116847	-0.0818299	-0.168324	-0.192194	-0.267247	-0.122237	-0.169925	-0.169925	-0.291723	0.0951572	-0.299442	-0.325061	-0.375867	-0.551174	-0.131132	-0.227579	-0.0503122	-0.125831	-0.297681	-0.254024	-0.193429
HUXP1015E11	CDKN3	cyclin-dependent kinase inhibitor 3 (CDK2-associated dual specificity phosphatase)	NM_005192	1033	24	1	0.00492989	-0.111933	-0.0630755	-0.338169	-0.0946454	-0.089666	-0.0552326	0.0881578	-0.168745	-0.0883395	-0.10218	-0.0334285	-0.253855	-0.175073	-0.104382	-0.237288	-0.247366	-0.244479	-0.239938	-0.19342	-0.521204	-0.232382	-0.23625
HUXP1074B01	CKS2	CDC28 protein kinase regulatory subunit 2	NM_001827	1164	24	1	-0.179679	0.123323	-0.0741317	-0.0496909	-0.177123	-0.0962369	-0.141406	-0.384437	-0.240426	-0.0210616	-0.201899	-0.140086	-0.312544	-0.177223	-0.104494	-0.346026	0.0685932	-0.107506	-0.505139	-0.393011	-0.281054	0.152696	-0.119328
SHR020061004G11	COL6A2	collagen, type VI, alpha 2	NM_058175	1292	24	1	-0.0703893	-0.247928	0.273018	NaN	0.0766213	-0.132104	0	-0.402547	-0.194816	-0.188204	-0.121464	-0.16273	-0.196916	-0.181711	-0.0498759	-0.269518	-0.0671142	NaN	-0.480805	-0.4667	NaN	-0.253757	-0.723482
HUXP1104H08	CTNND1	catenin (cadherin-associated protein), delta 1	NM_001331	1500	24	1	0.00702531	0.00480556	-0.104598	-0.00318476	-0.121959	-0.167615	-0.12521	-0.222902	0.00459824	-0.312561	-0.0661956	-0.152321	-0.121243	-0.310568	-0.300539	-0.486636	-0.458338	-0.327165	-0.255508	-0.218472	-0.286595	-0.0760715	-0.117917
HUXP1141F05	CYB5A	cytochrome b5 type A (microsomal)	NM_148923	1528	24	1	-0.0333201	0.0795673	-0.136595	-0.261705	-0.0334465	-0.115767	-0.0568312	-0.108472	-0.169925	0.0174171	-0.0614005	-0.0949116	-0.323872	-0.114617	-0.392317	-0.370643	-0.513996	-0.227562	-0.267967	-0.161411	-0.0510742	0.152003	-0.203808
HUXP1180D06	CYP2A6	cytochrome P450, family 2, subfamily A, polypeptide 6	NM_000762	1548	24	1	-0.158046	-0.329271	-0.316603	-0.0227893	-0.019863	0.10805	0.0412648	-0.131334	-0.0458257	-0.153497	-0.145958	-0.263811	-0.253027	-0.0383433	-0.0839948	-0.265487	-0.190874	-0.180257	-0.168844	-0.145246	-0.215908	-0.266925	-0.290217
HUXP1043A04	DPAGT1	dolichyl-phosphate (UDP-N-acetylglucosamine) N-acetylglucosaminephosphotransferase 1 (GlcNAc-1-P transferase)	NM_001382	1798	24	1	0.0499685	-0.326574	-0.0616923	-0.00832486	-0.246239	-0.304855	-0.291766	-0.233543	-0.338169	-0.342153	-0.135655	0.00631377	-0.202461	-0.192298	-0.231173	-0.389274	-0.230298	-0.332753	-0.335371	-0.254814	-0.417584	-0.106371	-0.319068
HUXP1169F01	ERN1	endoplasmic reticulum to nucleus signalling 1	NM_152461	2081	24	1	-0.0161799	-0.201787	-0.265044	-0.062968	-0.00737953	-0.00918455	0.0271161	0.179573	-0.151074	-0.338278	-0.307658	-0.135757	-0.264462	-0.293965	-0.190016	-0.126453	-0.19748	-0.224817	-0.19299	-0.189252	-0.324425	-0.450154	-0.19955
HUXP1104A04	ESD	esterase D/formylglutathione hydrolase	NM_001984	2098	24	1	-0.166885	-0.0755053	-0.0471591	-0.176771	-0.13196	-0.0753015	-0.140113	-0.245781	-0.104569	-0.0984174	-0.119142	-0.104631	-0.363087	-0.401833	-0.239674	-0.45438	-0.355821	-0.176374	-0.288398	-0.161787	-0.487585	-0.208947	-0.154778
HUXP1018D05	EZH2	enhancer of zeste homolog 2 (Drosophila)	NM_152998	2146	24	1	-0.12788	-0.0487895	-0.0719976	-0.209549	-0.201067	-0.175964	-0.0936732	-0.0168738	-0.133807	-0.144571	-0.0939094	-0.0348538	-0.0082541	-0.100512	-0.146334	-0.0137401	-0.358724	-0.280356	-0.270953	-0.233117	-0.435782	-0.106123	-0.432597
HUXP1054B11	FGF2	fibroblast growth factor 2 (basic)	NM_002006	2247	24	1	-0.3254	0.0361823	0.0713388	-0.156726	-0.0347654	-0.0813001	-0.220126	-0.120294	-0.102362	-0.265142	-0.237039	-0.251185	-0.167727	-0.313965	-0.307429	-0.32567	-0.333243	-0.439821	-0.247267	-0.239071	-0.273923	-0.0892673	-0.158182
HUXP1180D05	FMO3	flavin containing monooxygenase 3	NM_006894	2328	24	1	-0.135339	-0.280126	-0.30781	-0.132049	0.0303262	0.104082	0.0638024	-0.256737	0.00246264	-0.0881592	-0.190147	-0.236935	-0.186576	-0.0208928	-0.0825502	-0.204327	-0.188365	-0.198627	-0.246596	-0.108322	-0.186803	-0.271406	-0.22395
HUXP1022H04	FUT8	fucosyltransferase 8 (alpha (1,6) fucosyltransferase)	NM_178157	2530	24	1	-0.153351	-0.0062726	-0.0671142	-0.177787	0.109383	0.06311	0.0503903	-0.273376	-0.315355	-0.0945456	0.048363	-0.0978473	-0.141869	-0.119172	-0.239922	-0.607188	-0.294834	NaN	-0.20589	-0.169158	-0.284615	-0.306014	-0.396201
HUXP1040A04	FVT1	follicular lymphoma variant translocation 1	NM_002035	2531	24	1	-0.108836	-0.157312	-0.178457	-0.113841	-0.0912958	-0.106389	-0.137068	-0.191912	-0.153623	-0.257158	-0.205424	-0.329889	-0.102109	-0.176605	-0.242722	-0.38585	-0.204662	-0.41301	-0.365133	-0.299319	-0.298081	-0.50507	-0.377367
HUXP1048C03	GBE1	glucan (1,4-alpha-), branching enzyme 1 (glycogen branching enzyme, Andersen disease, glycogen storage disease type IV)	AV656343	2632	24	1	0.0853915	-0.142253	-0.145117	-0.120294	NaN	NaN	-0.128898	0.244419	-0.292451	-0.126912	-0.0840643	-0.0161197	-0.137504	-0.402098	NaN	-0.277985	-0.10497	NaN	-0.0817941	-0.129635	-0.441372	-0.0343515	-0.419539
HUXP1079C12	HIVEP1	human immunodeficiency virus type I enhancer binding protein 1	NM_002114	3096	24	1	-0.245422	-0.328693	-0.293473	-0.0744248	-0.0499626	0.0974409	0.105231	-0.39034	-0.072956	-0.128809	-0.0924274	-0.338914	-0.320394	-0.451338	-0.358922	-0.214594	-0.243538	-0.2876	-0.284809	-0.378845	-0.24157	-0.44647	-0.352185
HUXP1072G09	PRMT2	protein arginine methyltransferase 2	NM_206962	3275	24	1	-0.0297473	-0.116645	-0.0151864	-0.0595888	-0.0744248	-0.156969	-0.24731	-0.257496	-0.205469	0.0694214	0.00620515	0.028759	-0.298081	-0.0854693	-0.29956	-0.0901978	-0.249614	-0.162939	-0.175087	-0.216811	-0.35967	-0.0119726	-0.380822
HUXP1103H12	ID4	inhibitor of DNA binding 4, dominant negative helix-loop-helix protein	NM_001546	3400	24	1	-0.0563074	-0.150025	-0.0112273	-0.127659	-0.0253718	-0.173452	-0.136765	-0.197496	-0.152395	-0.0760824	-0.096602	0.0283199	0.0140254	-0.218066	-0.235198	-0.409353	-0.429312	-0.424256	-0.304963	-0.207308	-0.181838	-0.0832555	-0.0409567
HUXP1060F07	KCNN2	potassium intermediate/small conductance calcium-activated channel, subfamily N, member 2	NM_021614	3781	24	1	-0.0881309	0.0267173	-0.215268	-0.0408337	-0.120294	-0.062061	-0.0191088	NaN	-0.263034	NaN	-0.0931094	-0.217231	-0.356935	-0.356144	-0.396517	-0.277853	-0.301656	NaN	-0.15014	-0.351472	-0.203214	0.0246621	-0.206451
SHR020061007C06	KPNB1	karyopherin (importin) beta 1	AI948513	3837	24	1	0.0288961	-0.0321853	-0.00461663	0.00620515	-0.291426	-0.225252	-0.146699	-0.0964912	0.0931094	-0.111031	0.131052	-0.283793	-0.1568	-0.0396983	-0.23214	-0.281647	-0.602431	-0.263034	-0.34559	-0.162588	-0.398	-0.151118	-0.462068
HUXP1120F09	LIPA	lipase A, lysosomal acid, cholesterol esterase (Wolman disease)	NM_000235	3988	24	1	-0.314873	-0.15164	-0.288676	-0.0398193	-0.104494	-0.036876	-0.0254787	-0.471504	-0.17585	-0.148644	-0.283793	0.0204641	-0.281068	-0.519929	-0.242201	-0.406159	-0.497073	-0.247928	-0.0515303	-0.0278342	-0.103254	-0.0824622	-0.157262
HUXP1012B08	GPIAP1	GPI-anchored membrane protein 1	NM_005898	4076	24	1	-0.247832	0.0185558	-0.0156194	0.0601696	-0.13714	-0.0690704	-0.00824581	0.0298267	-0.321352	-0.0753367	0.0343515	0.0143974	-0.062165	-0.189906	-0.152003	-0.211198	-0.0883676	-0.235822	-0.123269	-0.131245	-0.245872	-0.292069	-0.207965
HUXP1047H09	SMAD5	SMAD family member 5	NM_001001419	4090	24	1	-0.13234	-0.271577	-0.207292	-0.0750704	-0.201996	-0.110323	-0.230216	-0.369	-0.181447	-0.0848889	0.0311385	-0.355388	-0.368437	-0.323917	-0.147154	-0.39079	-0.134093	-0.205749	-0.15997	-0.157952	-0.334867	-0.277853	-0.482465
HUXP1019B08	MAX	MYC associated factor X	NM_145113	4149	24	1	0.120694	-0.0530521	-0.00196955	-0.302143	0.0498605	0.0647703	-0.037007	-0.175442	-0.170657	-0.0632649	-0.0493423	-0.320573	-0.265251	-0.363949	-0.283081	-0.288707	-0.399545	-0.279042	-0.119894	0.0278132	0.105982	-0.105053	-0.21141
HUXP1104A08	MCL1	myeloid cell leukemia sequence 1 (BCL2-related)	AF198614	4170	24	1	-0.0473057	-0.062061	-0.0543272	0.0615169	-0.0419259	-0.156628	-0.0790968	-0.0366031	-0.0571954	-0.0594765	-0.15946	-0.164229	-0.21544	-0.391211	-0.249443	-0.56042	-0.308001	-0.241264	-0.21302	-0.120468	-0.362725	-0.224631	-0.121237
HUXP1005C06	MMP2	matrix metallopeptidase 2 (gelatinase A, 72kDa gelatinase, 72kDa type IV collagenase)	NM_004530	4313	24	1	0.197037	-0.132812	-0.265461	-0.0298705	-0.172316	0.133267	-0.341405	0.0506261	-0.590745	-0.0824622	0.0320612	0.0744248	-0.170959	0.0349338	-0.443052	-0.252063	-0.0972972	-0.279686	-0.180059	-0.33156	-0.162271	-0.353637	-0.345135
HUXP1030G08	MST1	macrophage stimulating 1 (hepatocyte growth factor-like)	NM_020998	4485	24	1	-0.0630496	-0.240956	-0.244293	-0.0801605	-0.101195	0.090346	0.157079	-0.217792	-0.0467526	-0.23663	-0.165541	-0.188675	-0.341001	-0.380467	-0.180944	-0.379302	-0.182671	-0.240791	-0.245941	-0.233465	-0.367259	-0.331167	-0.34857
SHR020061035D02	NDUFC2	NADH dehydrogenase (ubiquinone) 1, subcomplex unknown, 2, 14.5kDa	NM_004549	4718	24	1	-0.128362	-0.180515	-0.104143	-0.287324	-0.191508	-0.141281	-0.220062	-0.182758	-0.0337982	-0.147482	-0.169553	-0.0999624	-0.190141	-0.212619	-0.0546029	-0.370766	-0.201702	-0.414232	-0.419188	-0.376128	-0.35765	-0.204802	-0.385797
HUXP1056H11	NDUFV3	NADH dehydrogenase (ubiquinone) flavoprotein 3, 10kDa	NM_001001503	4731	24	1	-0.0453919	-0.103912	-0.0182911	-0.0404143	-0.0288228	-0.0753653	-0.138561	-0.212729	-0.0105886	-0.121991	-0.15952	-0.14221	-0.428118	-0.275875	-0.251006	-0.386183	-0.210474	-0.228624	-0.198506	-0.0782945	-0.378512	-0.225244	-0.105281
HUXP1183E02	NFX1	nuclear transcription factor, X-box binding 1	NM_002504	4799	24	1	-0.163322	-0.0359899	-0.161516	-0.163859	-0.216811	-0.131245	-0.255743	-0.290647	-0.0865877	-0.0536553	-0.154482	-0.484928	-0.105318	-0.177632	-0.218965	-0.228362	-0.142165	-0.288404	-0.27262	-0.218754	-0.127444	-0.246001	-0.385784
HUXP1120E10	PER1	period homolog 1 (Drosophila)	NM_002616	5187	24	1	0.0208013	-0.11335	-0.0466932	-0.0890257	-0.0605047	-0.253187	-0.147856	0.0749326	-0.189875	-0.345354	-0.204482	-0.306839	-0.0344884	-0.231998	-0.120941	-0.155031	-0.327909	-0.2367	-0.217836	-0.243472	-0.297523	-0.309131	-0.235244
SHR020061028E04	PMS2L3	postmeiotic segregation increased 2-like 3	N53969	5387	24	1	-0.0475004	-0.172055	-0.445524	0	-0.214576	-0.29579	-0.157064	-0.216133	-0.0230836	-0.123472	-0.160823	-0.342106	-0.325969	-0.228153	-0.267231	-0.00952277	-0.243998	-0.205749	-0.211209	-0.288569	-0.258312	-0.0180114	-0.0725733
HUXP1122C07	POLR2K	polymerase (RNA) II (DNA directed) polypeptide K, 7.0kDa	NM_005034	5440	24	1	-0.190067	-0.190983	-0.144322	-0.250492	-0.077561	-0.120574	-0.0483444	-0.285986	-0.122053	-0.106224	-0.363748	-0.191547	-0.288076	-0.404638	-0.19805	-0.40016	-0.22741	-0.179266	-0.124264	-0.144116	-0.146434	-0.1593	-0.00853388
SHR020061013B04	PPP3CB	protein phosphatase 3 (formerly 2B), catalytic subunit, beta isoform (calcineurin A beta)	Hs.500067	5532	24	1	-0.00817393	-0.219487	-0.0549665	-0.106915	-0.0952805	-0.147154	-0.0438543	-0.0530184	-0.0719861	-0.244622	-0.17433	0.0917162	-0.322651	-0.23349	-0.106915	-0.313075	-0.395929	-0.141092	-0.187322	-0.134843	-0.457812	-0.29059	-0.388355
HUXP1066D11	PTPRA	protein tyrosine phosphatase, receptor type, A	NM_080840	5786	24	1	0.0025557	0.065204	-0.0214054	0.0207188	0.0536047	0.00890555	-0.0690028	-0.0222113	-0.0915539	-0.062061	-0.117387	-0.252996	-0.24494	-0.342063	-0.294246	-0.294285	-0.206451	-0.311087	-0.241947	-0.292409	-0.18549	-0.207	-0.279013
HUXP1003D05	RAP1B	RAP1B, member of RAS oncogene family	NM_001010942	5908	24	1	-0.233858	0.0347987	-0.0829126	-0.113748	-0.0739554	-0.0238974	-0.0780628	-0.0156842	-0.367169	-0.133267	-0.258028	-0.100422	-0.194832	-0.349669	-0.338116	-0.290333	-0.332781	-0.254883	-0.14933	-0.0556736	-0.0694801	-0.156793	-0.237444
HUXP1113C06	RAP1GAP	RAP1 GTPase activating protein	NM_002885	5909	24	1	0	-0.10142	-0.163886	0.036792	-0.367732	-0.263034	-0.0508491	-0.00708942	-0.186769	-0.208108	-0.0974658	-0.257981	-0.288888	-0.0694851	-0.273648	-0.574694	-0.109624	-0.365871	-0.129283	-0.186878	-0.392701	-0.341037	-0.171611
SHR020061019C06	RAP1GDS1	RAP1, GTP-GDP dissociation stimulator 1	NM_021159	5910	24	1	-0.193308	-0.361369	-0.0138058	-0.112618	-0.246512	-0.154034	-0.186413	-0.241818	-0.119007	-0.279482	-0.192121	-0.0675068	-0.209391	-0.230643	-0.205002	-0.370643	-0.326923	-0.30516	-0.261636	-0.238382	-0.450477	-0.420843	-0.311708
HUXP1035B08	RASA2	RAS p21 protein activator 2	NM_006506	5922	24	1	-0.010305	-0.0363942	-0.308595	-0.0900804	0.166595	-0.117078	-0.199174	-0.150622	-0.0173821	-0.347554	-0.101565	-0.172721	-0.16819	-0.00413973	-0.330558	-0.159763	-0.414155	-0.312914	-0.255954	-0.173719	-0.267979	-0.102714	-0.179518
HUXP1101E12	RNF5	ring finger protein 5	NM_006913	6048	24	1	0.018859	-0.355403	-0.0874628	-0.167868	0.0444995	-0.172837	-0.0282199	-0.250095	-0.0255351	-0.22896	-0.376376	-0.280283	-0.134843	-0.380492	-0.233913	-0.193604	-0.206451	-0.155711	-0.320345	-0.352573	-0.214319	-0.331731	-0.325044
HUXP1211C09	RPL18A	ribosomal protein L18a	NM_000980	6142	24	1	0.0294819	0.0148448	0.0370976	-0.0331626	0.0555026	0.00518669	-0.0512068	0.0721117	-0.00266919	-0.0778747	-0.141548	-0.236795	-0.128989	-0.221547	-0.0934118	-0.251878	-0.309084	-0.306757	-0.325055	-0.221087	-0.423895	-0.259277	-0.246496
HUXP1075D04	RPL38	ribosomal protein L38	NM_000999	6169	24	1	-0.0265374	-0.188628	-0.236883	-0.005044	-0.0339229	-0.0382167	-0.0641391	0.0889948	-0.223921	0.201437	-0.251824	-0.202098	-0.172286	-0.136891	0.0671538	-0.278345	-0.26811	-0.0943625	-0.235365	0.00675364	-0.571647	-0.229611	-0.262278
HUXP1014F02	RPS16	ribosomal protein S16	NM_001020	6217	24	1	0.00678597	-0.398061	0.19303	0.124406	-0.00510784	0.378914	-0.257158	-0.110997	0.0909517	-0.328096	0.153656	-0.272706	-0.433856	-0.103156	0.0101411	-0.269444	-0.412923	-0.395336	-0.180887	0.302676	-0.461432	-0.527854	-0.297386
HUXP1188E06	RPS27A	ribosomal protein S27a	NM_002954	6233	24	1	-0.154131	-0.159939	-0.00933859	-0.101621	-0.241261	0.256901	-0.125576	0.0426982	-0.116995	-0.0730753	-0.0610064	-0.053363	0.0433214	-0.23694	-0.370807	-0.589129	0.161064	0.235376	-0.455486	-0.398969	-0.321762	-0.395952	NaN
SHR020061035G08	SETMAR	SET domain and mariner transposase fusion gene	NM_006515	6419	24	1	-0.10497	0.0194962	-0.109498	-0.0570309	-0.0690416	0.057551	0.0971687	-0.0846624	-0.062061	-0.0343515	0	-0.331621	0.0272729	-0.329018	-0.123058	-0.401896	-0.265054	-0.296982	-0.395692	-0.33034	-0.348804	-0.187627	-0.397335
HUXP1015B11	TAF10	TAF10 RNA polymerase II, TATA box binding protein (TBP)-associated factor, 30kDa	AV758455	6881	24	1	0.00472241	-0.122356	-0.102741	-0.200987	-0.0880674	-0.0889736	-0.169925	-0.178337	-0.0728208	-0.268742	-0.39645	-0.422691	-0.261764	-0.431255	-0.253541	-0.262336	-0.258976	-0.236261	-0.126207	0.025068	-0.159383	-0.148207	-0.009859
HUXP1040F04	UGT2B7	UDP glucuronosyltransferase 2 family, polypeptide B7	NM_001074	7364	24	1	-0.2367	-0.0782514	-0.075551	-0.103538	0.0634254	-0.265239	0.0206595	-0.118644	-0.168038	0.0610294	0.0268001	-0.143364	-0.304581	-0.451563	-0.186413	-0.262036	0.103093	-0.199309	-0.299886	-0.309483	-0.249614	-0.492205	-0.333901
SHR020060014F02	WRN	Werner syndrome	NM_000553	7486	24	1	0.0482091	-0.224706	-0.280901	-0.419376	-0.188445	-0.00737953	0	0.13516	0.0731664	-0.199309	-0.0264722	-0.0413408	-0.134843	0.120899	-0.0329983	-0.333363	-0.377563	NaN	0.169212	-0.417121	-0.171112	-0.211209	-0.270648
HUXP1189G05	XPNPEP1	X-prolyl aminopeptidase (aminopeptidase P) 1, soluble	NM_020383	7511	24	1	-0.149307	-0.168371	-0.0733085	-0.037104	-0.119449	-0.053824	-0.0558457	-0.369694	-0.124771	-0.133517	-0.118924	-0.16762	-0.347178	-0.262706	-0.178467	-0.454842	-0.35002	-0.248445	-0.437469	-0.306431	-0.413384	-0.352157	-0.268484
HUXP1075A09	RDBP	RD RNA binding protein	NM_002904	7936	24	1	-0.121599	-0.0316878	0.075617	-0.0423708	-0.209308	-0.165137	-0.097337	0.202044	-0.293857	-0.060121	-0.294145	-0.232588	-0.169094	-0.416123	-0.330824	-0.145554	-0.304855	-0.148425	-0.174349	-0.0548918	-0.250035	-0.404881	-0.329421
HUXP1044F06	HIRIP3	HIRA interacting protein 3	NM_003609	8479	24	1	-0.21929	0.0422282	-0.124137	-0.103764	-0.20515	-0.152003	-0.178028	0.0507018	-0.413107	-0.301612	-0.401415	-0.31296	-0.289908	-0.291391	-0.370306	-0.175326	-0.198676	-0.125799	-0.220139	-0.218424	-0.446827	-0.00431299	-0.156331
HUXP1050F06	PABPC4	poly(A) binding protein, cytoplasmic 4 (inducible form)	Hs.169900	8761	24	1	-0.117494	-0.140045	-0.031157	0.0366531	-0.14092	-0.136403	-0.200046	0.0732928	-0.326094	-0.296859	-0.217305	-0.282409	-0.180195	-0.148761	-0.343882	-0.225094	-0.324583	-0.401932	-0.366092	-0.376161	-0.410182	-0.00121593	-0.306772
HUXP1101F09	SIGLEC5	sialic acid binding Ig-like lectin 5	Hs.310333	8778	24	1	-0.221029	-0.431902	-0.185254	0.0477783	-0.00082933	0.153353	0.213078	-0.151761	-0.206205	-0.110358	-0.233327	-0.291263	-0.474374	-0.382154	-0.0916784	-0.362167	-0.088812	-0.204738	-0.307963	-0.223622	-0.306692	-0.0772508	-0.239146
HUXP1035G04	PEX11B	peroxisomal biogenesis factor 11B	NM_003846	8799	24	1	-0.138328	0.0358205	-0.0960018	-0.00582908	0.0145483	0.00741747	-0.309328	-0.154328	-0.115477	0.0311946	-0.014797	-0.397071	-0.237416	-0.194549	-0.246283	-0.451107	-0.242655	-0.060968	-0.179409	-0.142487	-0.254101	-0.467986	-0.324392
HUXP1030F03	USP10	ubiquitin specific peptidase 10	NM_005153	9100	24	1	0.0382099	-0.280861	-0.308006	-0.122202	-0.253553	-0.287218	-0.216352	-0.255501	-0.434189	-0.112557	-0.141554	-0.245916	-0.248807	-0.411706	-0.28508	-0.29683	-0.315834	-0.262922	-0.201825	-0.162539	-0.0242391	-0.213805	-0.193872
HUXP1159H08	MTMR4	myotubularin related protein 4	NM_004687	9110	24	1	0.0901978	-0.20987	-0.203533	0.0501858	0.0344335	0.173829	0.156119	0.0152668	-0.24912	-0.0427496	-0.0981101	-0.0806185	-0.382355	-0.308753	-0.274439	-0.265239	-0.12142	-0.178337	-0.211121	-0.142321	-0.133025	0	-0.0683371
SHR020061011C03	SFRS11	splicing factor, arginine/serine-rich 11	NM_004768	9295	24	1	-0.0521227	-0.236348	-0.128219	-0.143121	-0.215995	-0.134556	-0.0660483	0.0138619	-0.249256	-0.0992721	0.218952	-0.333328	-0.17046	-0.129644	-0.160338	-0.172303	-0.201529	-0.27214	-0.264826	-0.262369	-0.248192	-0.274213	-0.277282
HUXP1013F06	CNOT8	CCR4-NOT transcription complex, subunit 8	NM_004779	9337	24	1	-0.0333862	-0.224255	-0.25073	-0.213892	-0.205092	-0.064403	-0.0410829	-0.421172	-0.400355	-0.413644	-0.0835407	-0.107476	-0.256385	-0.256084	-0.159348	-0.341531	-0.192917	-0.411337	-0.13482	-0.173564	-0.16435	-0.379871	-0.100039
HUXP1124C04	ROCK2	Rho-associated, coiled-coil containing protein kinase 2	AL049383	9475	24	1	-0.174632	-0.0418202	-0.216209	-0.218062	-0.107172	-0.0824622	-0.10497	-0.111421	-0.388402	-0.163101	0	-0.35311	-0.48432	-0.190144	-0.152266	-0.331798	-0.114796	-0.122719	-0.236352	-0.167945	-0.385431	-0.321928	-0.256134
HUXP1051G03	EI24	etoposide induced 2.4 mRNA	NM_004879	9538	24	1	-0.149584	-0.086656	0.0220825	0.0875249	-0.0834282	0.0183373	0.0272058	0.0690889	0.154123	0.0114117	-0.0920043	-0.056216	-0.20337	-0.405791	-0.175559	-0.377706	-0.248176	-0.0609041	-0.226472	-0.0499159	-0.286951	-0.252881	-0.309394
HUXP1088E06	VGLL4	vestigial like 4 (Drosophila)	NM_014667	9686	24	1	0.168337	-0.240094	-0.132147	-0.23078	-0.0976967	-0.0729924	-0.206919	-0.194757	-0.360176	-0.238724	-0.378512	-0.194219	-0.333921	-0.264062	-0.346891	-0.26587	-0.394398	-0.264273	-0.47938	-0.334087	-0.0168738	-0.181887	-0.392317
HUXP1020G10	DOCK4	dedicator of cytokinesis 4	NM_014705	9732	24	1	-0.096676	0.0273164	-0.169378	-0.146752	-0.257092	-0.171611	-0.118714	-0.285958	-0.0511043	-0.172404	-0.0408723	-0.216922	-0.105775	-0.190052	-0.298999	-0.280928	-0.423872	-0.408164	-0.317455	-0.198013	-0.524376	-0.262456	-0.213404
HUXP1042E07	KIAA0528	KIAA0528	NM_014802	9847	24	1	-0.0486845	-0.229988	-0.203887	-0.0751791	-0.209347	0.0501461	-0.127756	-0.303907	-0.315042	0.0401704	-0.16378	-0.369036	-0.286821	-0.354008	-0.382535	-0.317926	-0.259021	0.0132358	-0.172918	-0.200697	0.193942	-0.263034	-0.0964628
SHR020060018A01	KIAA0319	KIAA0319	NM_014809	9856	24	1	-0.209992	0.0232147	-0.0225778	-0.306807	-0.342888	-0.143836	0.0392124	-0.182377	0.292782	-0.17603	0.0318489	-0.217029	0.00334344	0.0247679	-0.334419	-0.31824	-0.198546	-0.267284	-0.0587737	-0.254383	-0.383329	-0.415037	-0.29844
HUXP1065B11	PJA2	praja 2, RING-H2 motif containing	NM_014819	9867	24	1	-0.132224	-0.358283	-0.18117	-0.173166	-0.0535155	0.0603726	0.0440926	-0.0656669	-0.20787	-0.209671	-0.148721	-0.206694	-0.142958	-0.210638	-0.208317	-0.172909	0.0339473	-0.0928788	-0.277497	-0.289795	-0.219753	-0.230954	-0.303983
HUXP1118D05	DDX46	DEAD (Asp-Glu-Ala-Asp) box polypeptide 46	NM_014829	9879	24	1	0.0626586	-0.349555	-0.0911926	-0.26559	-0.0938597	-0.0823026	-0.0227919	0.227934	0.0623965	0.139077	0.386118	-0.405803	-0.232705	-0.144803	-0.300635	-0.234704	-0.519374	-0.245164	-0.324236	-0.166616	-0.235879	-0.373583	-0.102457
HUXP1107C08	PDCD6IP	programmed cell death 6 interacting protein	NM_013374	10015	24	1	0.103093	-0.150795	0.0593785	-0.00426833	-0.0227201	-0.0338147	-0.0539	-0.0738284	0.0034473	-0.148392	-0.224935	-0.290282	-0.077561	-0.427264	-0.364723	-0.177998	-0.45273	-0.218323	-0.292634	-0.13854	-0.234776	-0.0926493	-0.174029
HUXP1090D11	ACTR2	ARP2 actin-related protein 2 homolog (yeast)	NM_005722	10097	24	1	-0.111852	-0.338361	-0.169033	-0.352611	-0.278923	-0.167117	-0.186595	-0.13999	-0.0992616	-0.297819	-0.141465	-0.222547	-0.120376	-0.450389	-0.239496	-0.445516	-0.343324	-0.278007	0.0458328	0.170039	-0.00760589	-0.488613	-0.0925472
HUXP1037D06	SRRM1	serine/arginine repetitive matrix 1	NM_005839	10250	24	1	-0.299014	-0.0212625	-0.052889	0.0284063	-0.0546906	0.0294438	0.0101559	-0.1313	-0.10303	-0.0600904	-0.0383208	0.0438162	-0.211091	-0.30368	-0.0845401	-0.342848	-0.0757675	-0.131245	-0.165245	-0.09586	-0.225954	-0.416435	-0.205206
SHR020061018A04	CFDP1	craniofacial development protein 1	NM_006324	10428	24	1	-0.131611	-0.296605	-0.205114	-0.3365	-0.257515	-0.211504	-0.246422	-0.252542	-0.189982	-0.0796824	-0.327262	-0.0657474	-0.277218	-0.30022	-0.218766	-0.434568	-0.522201	-0.270961	-0.278772	-0.19238	-0.381871	-0.237725	0.113896
HUXP1200D04	ZNHIT1	zinc finger, HIT type 1	NM_006349	10467	24	1	-0.253347	-0.216298	-0.224081	-0.156662	0.0624515	0.0395951	0.00220379	-0.0666819	-0.149969	-0.249953	-0.369082	-0.244749	-0.376618	-0.390591	-0.301362	-0.285646	-0.073018	-0.180706	-0.102123	-0.327408	-0.22787	-0.350475	-0.223184
SHR020060007D04	TMED10	transmembrane emp24-like trafficking protein 10 (yeast)	NM_006827	10972	24	1	-0.163638	-0.138976	-0.176111	-0.417486	-0.236325	-0.197764	-0.235842	-0.212875	-0.222684	-0.207442	-0.143184	-0.0679462	-0.227364	-0.266854	-0.216224	-0.34723	-0.334736	-0.371367	-0.275592	0.0923523	-0.399144	-0.275585	-0.0543545
HUXP1017G02	TOPBP1	topoisomerase (DNA) II binding protein 1	NM_007027	11073	24	1	-0.0987181	-0.0735386	-0.187872	-0.320368	-0.289218	-0.135718	-0.154658	0.0859496	-0.242815	-0.258556	-0.205563	-0.134061	-0.228643	-0.352302	-0.131245	-0.257651	-0.148425	-0.19531	-0.0548619	-0.12673	-0.392317	-0.41763	-0.306492
HUXP1058E08	PACSIN2	protein kinase C and casein kinase substrate in neurons 2	NM_007229	11252	24	1	-0.113313	-0.151707	-0.202313	-0.156296	-0.134498	-0.00986171	-0.0126057	-0.00389392	-0.18768	-0.0954825	-0.242075	-0.151261	-0.248166	-0.406529	-0.219302	-0.27497	-0.260116	-0.235909	-0.251212	-0.205285	-0.488331	-0.353549	-0.290053
HUXP1022E01	SACM1L	SAC1 suppressor of actin mutations 1-like (yeast)	NM_014016	22908	24	1	-0.148436	0.0180905	-0.107515	-0.244317	-0.180572	-0.219846	-0.10845	-0.374047	-0.243528	-0.249273	-0.0885154	-0.245112	-0.288007	-0.354718	-0.26348	-0.413351	-0.415781	-0.299973	-0.136488	-0.0775366	-0.289807	-0.289507	-0.190729
HUXP1074G09	SEPHS2	selenophosphate synthetase 2	NM_012248	22928	24	1	-0.39474	-0.00350879	0.032697	-0.0371391	-0.040452	0.021398	0.0316369	0.232148	0.104382	-0.055439	-0.24408	-0.0931094	-0.252561	-0.386148	-0.144023	-0.213315	-0.328102	-0.17818	-0.194658	-0.210185	-0.328203	-0.37119	-0.176268
HUXP1042F11	SPEN	spen homolog, transcriptional regulator (Drosophila)	NM_015001	23013	24	1	-0.241489	-0.0957814	0.0822879	0.0319901	0.125786	0.0735478	0.0113026	-0.0879334	-0.260709	-0.133969	-0.076006	-0.0457345	-0.135448	-0.357638	-0.253286	-0.27861	-0.167457	-0.106689	-0.0852852	-0.120048	-0.247928	-0.391386	-0.255199
HUXP1025G03	RBM34	RNA binding motif protein 34	NM_015014	23029	24	1	-0.229841	-0.157628	-0.244126	-0.291748	-0.188189	-0.169725	-0.274564	-0.165104	-0.110521	-0.082893	0.0183149	0.0021711	-0.208325	0.0297912	-0.241351	-0.28786	-0.161751	-0.392719	-0.160793	-0.313158	-0.152003	-0.431923	-0.0281053
HUXP1074G04	JMJD2B	jumonji domain containing 2B	NM_015015	23030	24	1	-0.140321	-0.187039	0.159657	-0.168162	-0.0517825	-0.344911	-0.193363	-0.243729	-0.290901	-0.285586	-0.426815	-0.460515	-0.221027	-0.536501	-0.333294	-0.293083	-0.233199	-0.306427	-0.259455	-0.21205	-0.416294	-0.346803	-0.156844
HUXP1083B06	NMNAT2	nicotinamide nucleotide adenylyltransferase 2	NM_170706	23057	24	1	0.0311946	-0.223775	-0.0152668	-0.123095	-0.141438	-0.130787	-0.0189416	0.0641303	-0.584963	-0.154975	-0.0727563	-0.0540398	-0.114643	-0.219507	-0.268489	-0.127756	-0.109823	NaN	-0.350647	-0.226771	-0.487049	-0.378512	-0.368782
HUXP1061F01	POGZ	pogo transposable element with ZNF domain	NM_207171	23126	24	1	0.0232698	-0.411216	-0.167236	-0.068351	-0.14543	0.00749454	-0.173332	-0.167457	NaN	0	-0.353179	-0.233059	-0.490635	-0.347923	-0.0561431	-0.12673	-0.213595	0.027745	-0.185715	-0.177643	-0.197561	0	-0.323042
HUXP1028G01	KIAA0143	KIAA0143 protein	NM_015137	23167	24	1	NaN	-0.0977368	-0.136689	-0.580097	-0.319177	NaN	-0.0641303	NaN	-0.247928	0.0114956	NaN	0.0780025	-0.0232698	-0.284143	0.0175941	-0.274941	-0.655352	-0.200913	-0.313891	-0.121015	-0.153805	-0.200594	-0.342187
HUXP1067G06	ATP11B	ATPase, Class VI, type 11B	NM_014616	23200	24	1	-0.148608	-0.247202	-0.117224	-0.0975165	-0.187472	-0.118644	-0.150576	-0.21818	-0.268402	-0.0834444	-0.239266	-0.0737843	-0.220313	-0.203939	-0.145851	-0.175786	-0.172316	0.0200179	-0.0320909	-0.145316	0.138889	-0.0525681	-0.017731
HUXP1046B05	PLCB1	phospholipase C, beta 1 (phosphoinositide-specific)	NM_182734	23236	24	1	-0.106799	-0.294094	-0.137504	-0.376836	-0.370571	-0.227902	-0.24147	-0.0247414	-0.135748	-0.183618	0.115148	-0.291821	-0.270056	-0.0589359	-0.443228	-0.360342	-0.157337	-0.338273	-0.208898	-0.194568	-0.109571	-0.331499	-0.145411
HUXP1061F08	TRIM2	tripartite motif-containing 2	NM_015271	23321	24	1	-0.0506261	-0.248871	-0.280344	-0.105795	-0.14439	-0.237165	-0.2326	0.175799	-0.62293	0.0583642	0.056034	-0.228886	-0.230467	-0.418631	-0.196892	-0.102201	-0.21205	-0.176665	-0.131658	-0.173767	-0.451379	-0.420255	-0.141305
HUXP1189G09	RHOQ	ras homolog gene family, member Q	CR594469	23433	24	1	0.0154157	-0.204201	-0.0117269	-0.269382	-0.0441676	-0.133532	-0.0674664	-0.195133	-0.0182734	-0.22118	-0.0715971	-0.223567	-0.289877	-0.405282	-0.380772	-0.51342	-0.316015	-0.334446	-0.172814	-0.00841838	-0.181352	-0.419021	-0.187012
HUXP1051E05	KLHDC2	kelch domain containing 2	NM_014315	23588	24	1	-0.0660892	-0.267307	-0.223423	-0.242984	-0.213839	-0.137048	-0.0625415	-0.0114956	-0.333294	-0.262368	-0.156535	0.0160174	-0.321436	-0.17073	-0.1905	-0.177459	-0.136351	-0.240337	-0.158518	-0.258734	-0.479993	-0.308608	-0.257324
HUXP1195A12	PPIL2	peptidylprolyl isomerase (cyclophilin)-like 2	NM_152689	23759	24	1	-0.129679	-0.137504	-0.00651331	0.049839	-0.217511	-0.209625	-0.104481	-0.107199	0.111274	0.0717299	-0.119372	-0.14009	-0.159219	-0.379346	-0.32137	-0.4315	-0.430557	-0.372899	-0.322958	-0.143018	-0.198947	-0.226382	-0.117108
HUXP1057G03	RIPK5	receptor interacting protein kinase 5	NM_199462	25778	24	1	-0.170699	-0.189875	-0.137082	-0.152438	-0.152599	-0.12993	-0.116988	-0.0847422	-0.121819	-0.146221	-0.206091	-0.110054	-0.253448	-0.259948	-0.139789	-0.328749	-0.162105	-0.198546	-0.338671	-0.0677446	-0.364274	-0.369234	-0.297336
HUXP1020A03	PNKD	paroxysmal nonkinesiogenic dyskinesia	AL080092	25953	24	1	-0.0180905	-0.197301	0.0501131	-0.0183998	-0.0973678	-0.119299	-0.116216	-0.0922876	-0.133062	-0.120382	-0.303513	-0.322685	-0.192121	-0.38033	-0.284815	-0.256014	-0.454867	-0.354939	-0.332113	-0.372952	-0.189034	-0.337303	-0.219033
HUXP1012B07	RPAP1	RNA polymerase II associated protein 1	NM_015540	26015	24	1	-0.0752881	-0.65355	0.206451	0.0144127	-0.345135	-0.124958	-0.192003	-0.101086	-0.210218	-0.40439	-0.448015	-0.163666	-0.122703	-0.0961237	0.069332	-0.11967	-0.177104	-0.154034	-0.205114	-0.153351	-0.399607	-0.211504	-0.154429
HUXP1051B10	ZNF451	zinc finger protein 451	NM_020931	26036	24	1	-0.281771	-0.0292567	-0.136131	-0.253125	-0.251427	-0.223803	-0.246613	0.0553901	-0.233405	-0.334079	-0.197395	-0.17568	-0.38958	-0.322026	-0.381302	-0.345733	-0.338557	-0.295993	-0.257858	-0.215759	-0.519241	-0.20523	-0.0559942
HUXP1060A11	NPTN	neuroplastin	NM_017455	27020	24	1	-0.189943	-0.239541	0.0670417	-0.0211498	-0.175742	-0.232411	-0.218047	-0.105219	-0.320189	-0.206192	-0.151294	0.00367098	-0.245638	-0.494499	-0.252818	-0.463077	-0.330704	-0.132665	-0.0864641	-0.125277	-0.29085	-0.374989	0.012824
HUXP1005C05	C1orf107	chromosome 1 open reading frame 107	NM_014388	27042	24	1	-0.127112	0.059501	0.0728506	0.0274807	-0.239007	-0.176323	-0.14066	-0.616671	-0.50564	0.0721498	0.0239789	0.0121747	-0.119739	-0.286881	-0.0588937	-0.334867	-0.222392	-0.357157	-0.442943	-0.23644	-0.193604	0.0688951	-0.271302
HUXP1111E12	FOXP1	forkhead box P1	NM_032682	27086	24	1	0.0631938	-0.396385	-0.146444	-0.0466262	0.0565835	0.0465426	0.0395284	-0.0954803	-0.194912	-0.300233	-0.402759	-0.347923	-0.381761	-0.327362	-0.319542	-0.246438	-0.321928	-0.350281	-0.289985	-0.285043	-0.146592	-0.216037	-0.088409
HUXP1109B11	UQCRQ	ubiquinol-cytochrome c reductase, complex III subunit VII, 9.5kDa	NM_014402	27089	24	1	-0.00961554	-0.055655	0.0363916	-0.234578	-0.0304509	-0.043693	-0.0948384	-0.186641	-0.0947109	-0.20753	0.0096228	-0.127067	-0.249237	-0.172592	-0.127931	-0.431356	-0.135725	-0.509397	-0.247884	-0.322818	-0.55338	-0.128533	-0.032773
HUXP1024A09	DIMT1L	DIM1 dimethyladenosine transferase 1-like (S. cerevisiae)	NM_014473	27292	24	1	-0.07953	-0.0925173	-0.0800879	-0.0755374	-0.0412516	0.0817292	0.041838	-0.219053	-0.124247	-0.0657395	0.0545414	-0.0822759	-0.472992	-0.195208	-0.0842226	-0.45679	-0.176945	-0.338256	-0.352661	-0.141977	-0.214474	-0.404533	-0.0962909
HUXP1117F12	C11orf67	chromosome 11 open reading frame 67	NM_024684	28971	24	1	-0.18353	-0.0331669	0.183346	0.122147	0.0537713	-0.241008	0.206451	-0.0139392	-0.115477	-0.106915	-0.0123837	-0.0671142	-0.11967	-0.266433	-0.34192	-0.174834	-0.260528	-0.40632	-0.172735	-0.0285692	-0.295007	-0.256014	-0.306785
HUXP1084B10	TMEM14A	transmembrane protein 14A	NM_014051	28978	24	1	-0.258859	0.0129801	0.00960733	-0.0573332	-0.0904647	-0.0778945	-0.17366	0.123846	-0.207267	-0.0981804	-0.189501	-0.107303	-0.322139	-0.26244	-0.340385	-0.322194	-0.344276	-0.338802	-0.294336	-0.292364	-0.38183	-0.306746	-0.344671
SHR020061016C05	GPSM2	G-protein signalling modulator 2 (AGS3-like, C. elegans)	NM_013296	29899	24	1	0.140863	-0.139122	0.168754	-0.254719	-0.0813001	0.0206103	0.0527874	-0.100305	NaN	-0.402098	0.0310269	-0.584963	-0.296471	-0.15455	-0.157541	-0.399096	NaN	NaN	-0.366782	-0.292553	-0.279382	-0.350497	-0.207912
HUXP1021G11	BAZ2B	bromodomain adjacent to zinc finger domain, 2B	NM_013450	29994	24	1	-0.135437	-0.239492	-0.229052	-0.368178	-0.16926	-0.243512	-0.120805	-0.0933326	-0.192141	-0.31895	-0.211504	-0.459432	-0.315202	-0.126798	-0.143172	-0.302777	-0.287282	-0.231947	-0.137068	-0.191048	-0.156119	-0.0921937	-0.302154
HUXP1121D09	SCCPDH	saccharopine dehydrogenase (putative)	NM_016002	51097	24	1	-0.0869833	-0.223268	0.0107464	-0.150417	-0.17322	-0.225941	-0.147777	-0.254183	-0.0336084	-0.0870567	-0.175349	-0.123434	-0.260934	-0.239913	-0.224248	-0.314037	-0.347133	-0.288996	-0.127052	-0.367057	-0.320065	-0.276568	-0.298829
HUXP1208F01	NT5C3	5'-nucleotidase, cytosolic III	NM_001002010	51251	24	1	-0.0671142	-0.104221	-0.167857	-0.363738	-0.0656998	-0.029641	0.111407	0.155675	0.0180414	0.0526691	-0.0145898	-0.0767373	-0.276372	0.122743	-0.110233	-0.287215	-0.251315	-0.423317	-0.257611	-0.280385	-0.462727	-0.31765	-0.264465
HUXP1024G05	IER5	immediate early response 5	NM_016545	51278	24	1	-0.116268	-0.28026	0.015241	-0.259034	0.053551	-0.0944388	0.0367326	0.0758759	-0.151409	-0.200727	-0.407914	-0.0564813	-0.478415	-0.0660792	0.0420551	0.141945	-0.345403	NaN	-0.42875	-0.365266	-0.427396	-0.177893	-0.271935
HUXP1117H10	MRPL35	mitochondrial ribosomal protein L35	NM_145644	51318	24	1	-0.354229	-0.104486	-0.0583829	0.0121134	-0.179056	-0.176665	-0.0166547	-0.216318	-0.152674	-0.0568623	-0.0947044	0	-0.206451	-0.365502	-0.217098	-0.15858	-0.00566875	-0.420751	-0.166521	-0.394441	-0.443213	-0.240204	-0.243557
HUXP1141F09	SNX7	sorting nexin 7	NM_015976	51375	24	1	0.000578582	-0.250101	-0.131049	-0.231243	-0.0578665	-0.175656	-0.209682	0.0279842	-0.192779	-0.253782	-0.284608	-0.309459	-0.331885	-0.265935	-0.249017	-0.356535	-0.312621	-0.451427	-0.340026	-0.302043	-0.280852	-0.109202	-0.243013
HUXP1165B07	TMEM14C	transmembrane protein 14C	NM_016462	51522	24	1	-0.125677	-0.0732834	-0.0991868	-0.0796172	-0.0371016	-0.0133105	-0.0454321	-0.182436	-0.0210216	0.0231936	-0.082761	0.0119429	-0.162295	-0.325322	-0.287282	-0.32386	-0.325417	-0.222039	-0.207158	-0.211337	-0.190268	-0.428792	-0.252402
HUXP1058B05	ARMCX3	armadillo repeat containing, X-linked 3	NM_177947	51566	24	1	0.0717907	-0.240069	-0.0992616	-0.131438	0.00779837	-0.0833557	0.0312509	0.235103	-0.107484	-0.199609	-0.193195	-0.207691	-0.221194	-0.429113	-0.238019	-0.254719	-0.170499	-0.374396	-0.0624641	-0.10103	-0.334984	-0.292977	-0.23816
HUXP1119G08	LARP7	La ribonucleoprotein domain family, member 7	NM_016648	51574	24	1	-0.268322	-0.120141	-0.28207	-0.46392	-0.457083	-0.146473	-0.159383	0.0973564	0.055056	-0.0628877	0.0207885	-0.310929	-0.298493	-0.338624	-0.179181	-0.385517	-0.0825421	-0.155932	-0.142843	-0.264306	-0.265431	-0.441413	-0.206451
HUXP1063E05	C11orf24	chromosome 11 open reading frame 24	NM_022338	53838	24	1	0.0479345	0.0537713	0.0100537	0.0437214	-0.277228	-0.166819	0.0759489	-0.404696	0.160992	-0.236067	-0.182864	-0.232493	-0.0705533	-0.124927	-0.379493	-0.266075	-0.433897	-0.364572	-0.231816	-0.324962	-0.281893	-0.316259	-0.291857
HUXP1019H03	FLJ20323	hypothetical protein FLJ20323	NM_019005	54468	24	1	-0.0643688	-0.0910004	0.0840643	-0.0517946	-0.142353	-0.200078	-0.128048	-0.280587	-0.293196	-0.0379679	-0.167394	-0.103748	-0.270593	-0.158583	0.0243842	-0.342815	-0.392915	-0.00708942	-0.316353	-0.0852473	-0.411978	0.139551	-0.41879
HUXP1116A04	TOMM7	translocase of outer mitochondrial membrane 7 homolog (yeast)	NM_019059	54543	24	1	-0.0885532	-0.0661199	-0.0408151	-0.0657157	-0.111764	-0.116005	-0.261883	-0.334276	-0.18484	-0.173407	-0.259879	-0.1262	-0.342508	-0.164951	-0.269331	-0.398327	-0.394556	-0.366904	-0.365034	-0.267465	-0.433617	-0.256376	0.0539787
HUXP1091F07	SBNO1	strawberry notch homolog 1 (Drosophila)	NM_018183	55206	24	1	-0.0949003	-0.193814	-0.103453	-0.100356	-0.189708	-0.0972218	-0.175106	-0.0776321	-0.161049	-0.0292017	-0.00491131	-0.134915	-0.120912	-0.196977	-0.240001	-0.319177	-0.403356	-0.382109	-0.314505	-0.229567	-0.232709	-0.0573087	-0.0931734
HUXP1102C09	RFK	riboflavin kinase	NM_018339	55312	24	1	-0.192645	-0.0340363	-0.255945	-0.108182	0.263034	-0.119909	-0.124755	-0.103378	-0.206451	-0.15056	-0.124499	-0.0322403	-0.219678	-0.175497	-0.388772	-0.379237	-0.268935	-0.432959	-0.0967851	-0.128733	-0.320368	-0.266646	-0.235103
HUXP1057C09	FLJ11184	hypothetical protein FLJ11184	NM_018352	55319	24	1	-0.118802	-0.188101	-0.0981556	-0.140467	-0.161836	-0.113482	-0.102601	-0.128538	-0.0630668	-0.116434	-0.0185287	-0.026967	-0.254723	-0.212112	-0.248395	-0.430212	-0.41879	-0.425926	-0.353302	-0.211442	-0.35941	-0.2488	-0.0830872
HUXP1019F03	C5orf22	chromosome 5 open reading frame 22	NM_018356	55322	24	1	-0.197358	0.00705476	-0.178642	NaN	-0.286304	-0.164481	-0.180138	-0.352302	-0.113341	-0.252242	-0.132993	-0.15899	-0.347923	-0.344775	-0.21864	-0.316122	-0.335486	NaN	-0.167992	0.0371275	-0.222392	-0.1105	-0.241008
HUXP1048D08	LIN7C	lin-7 homolog C (C. elegans)	NM_018362	55327	24	1	-0.276296	-0.161328	-0.126777	-0.266118	-0.188304	-0.100632	-0.175231	-0.184425	-0.230884	-0.199054	-0.0722627	0.0152437	-0.226991	-0.330824	-0.228874	-0.471451	-0.171302	-0.211504	-0.146583	-0.130804	-0.383047	-0.285868	-0.316791
HUXP1015F11	C6orf35	chromosome 6 open reading frame 35	NM_018452	55836	24	1	-0.111361	-0.289662	-0.00461171	-0.318702	-0.190213	-0.12013	-0.1377	0.227123	-0.0534888	-0.192645	-0.252974	-0.240282	-0.388315	-0.200154	-0.243784	-0.308163	-0.362921	-0.332983	-0.232944	-0.0668717	-0.396759	-0.0834408	-0.286133
HUXP1058E09	HDAC8	histone deacetylase 8	NM_018486	55869	24	1	-0.194466	-0.270833	-0.220048	-0.123382	-0.144963	0.0304538	-0.0765582	0.0301429	-0.298658	-0.177346	-0.29956	-0.193592	-0.406424	-0.479677	-0.18979	-0.138706	-0.302911	-0.251807	-0.177157	-0.16183	-0.363748	-0.192645	-0.305152
HUXP1074D04	RP11-82K18.3	kynurenine aminotransferase III	NM_001008662	56267	24	1	-0.311586	-0.225881	-0.158904	-0.301981	-0.164938	-0.115477	-0.105795	-0.117652	-0.156558	-0.244307	-0.182544	-0.210645	-0.133954	-0.313859	-0.055614	-0.221558	-0.268817	-0.420576	-0.320886	-0.108524	-0.518575	-0.195551	-0.197037
HUXP1002D03	C5orf15	chromosome 5 open reading frame 15	NM_020199	56951	24	1	-0.241008	-0.053032	0.0361736	-0.134777	-0.187892	-0.219678	-0.241008	-0.201634	-0.32075	-0.0924209	-0.181656	0.0764521	-0.254317	-0.457061	-0.167842	-0.323422	-0.370838	0.0981804	-0.13991	-0.189342	-0.385743	-0.362056	-0.363764
HUXP1067G12	TTC7A	tetratricopeptide repeat domain 7A	Hs.370603	57217	24	1	-0.161062	-0.228895	-0.044669	-0.0482283	-0.319372	-0.145117	-0.122857	0.408085	NaN	-0.246161	-0.0170735	-0.0691244	-0.339727	-0.383329	-0.220126	-0.267284	-0.307429	-0.10806	-0.157952	-0.0540398	-0.540175	-0.265461	-0.388479
HUXP1045F02	PRUNE	prune homolog (Drosophila)	NM_021222	58497	24	1	-0.141044	-0.169525	-0.143195	-0.0467942	-0.105709	-0.135883	-0.216394	-0.356319	-0.247041	-0.223158	-0.303392	0.00617857	-0.407124	-0.347074	-0.36257	-0.274538	-0.205051	-0.31999	-0.136944	-0.134693	-0.0885367	0.0717907	-0.239365
HUXP1127D10	FAM60A	family with sequence similarity 60, member A	NM_021238	58516	24	1	-0.246089	-0.309313	-0.202838	-0.175343	0.0420641	-0.0019172	0.154864	-0.271357	-0.242964	-0.259485	-0.116216	-0.0917828	-0.331581	-0.48362	-0.205942	-0.457246	-0.4267	-0.124465	-0.275403	-0.0927352	-0.216092	-0.296132	-0.216637
HUXP1129F02	MRPS35	mitochondrial ribosomal protein S35	NM_021821	60488	24	1	-0.182577	0.0084469	-0.0331207	-0.048265	-0.0773193	-0.100651	-0.0398435	-0.121978	-0.129744	-0.0481026	-0.0278762	0.0238053	-0.0892339	-0.230576	-0.357401	-0.433461	-0.242285	-0.311355	-0.303179	-0.243491	0.0440767	-0.204874	-0.130892
HUXP1009G12	GORASP1	golgi reassembly stacking protein 1, 65kDa	NM_031899	64689	24	1	-0.111893	-0.231476	-0.0620857	-0.124328	-0.0366807	-0.206451	-0.207915	0.127141	-0.316231	-0.20672	-0.306126	-0.312693	-0.273639	-0.306203	-0.265239	-0.181862	-0.213611	-0.281792	-0.252875	-0.293313	-0.256423	-0.194196	-0.305739
HUXP1105D11	RMND5A	required for meiotic nuclear division 5 homolog A (S. cerevisiae)	Hs.75277	64795	24	1	-0.0498759	-0.193651	-0.225447	-0.279284	-0.0515303	-0.276445	-0.0359196	-0.205153	-0.0721498	-0.118644	-0.255839	-0.0243704	-0.0935889	-0.262001	-0.258782	-0.41139	-0.30043	-0.285061	-0.20958	-0.182995	-0.153913	-0.340694	-0.101312
HUXP1119E05	THOC6	THO complex 6 homolog (Drosophila)	NM_024339	79228	24	1	0.0643504	0	0.129394	0.0295191	-0.188819	-0.400087	0.130134	-0.0201779	-0.0904153	0.0326662	-0.158065	-0.568843	0.023459	-0.0906454	-0.199609	-0.287802	-0.241457	-0.19827	-0.45591	-0.310183	-0.281286	-0.341691	-0.372513
HUXP1078H05	RNASEH2B	ribonuclease H2, subunit B	NM_024570	79621	24	1	-0.212863	-0.26737	-0.181711	-0.204106	-0.0489096	-0.0112055	0.0347654	0.0856382	0.0900322	0	-0.134542	0.0713174	-0.25704	-0.349942	-0.249495	-0.39098	-0.316555	-0.327969	-0.280306	-0.250878	-0.400916	-0.0466932	-0.28614
HUXP1090G03	ALG9	asparagine-linked glycosylation 9 homolog (S. cerevisiae, alpha- 1,2-mannosyltransferase)	NM_024740	79796	24	1	-0.227952	-0.483286	-0.078305	-0.132939	-0.206003	-0.270266	-0.0948097	-0.114902	-0.436571	-0.279073	-0.304153	-0.222392	-0.0637759	0.00369448	-0.183864	-0.269287	-0.219218	-0.354431	-0.186536	-0.32071	-0.18799	-0.0715533	-0.379539
HUXP1069A02	C18orf22	chromosome 18 open reading frame 22	NM_024805	79863	24	1	-0.219651	-0.402916	-0.278846	-0.095367	-0.0684135	0.00277708	0.0198186	-0.151631	-0.0319036	-0.0888324	-0.178693	-0.396482	-0.253993	-0.0991864	-0.055343	-0.270173	-0.125089	-0.126757	-0.245817	-0.27179	-0.0868182	-0.0944647	-0.343512
HUXP1005E11	OBFC1	oligonucleotide/oligosaccharide-binding fold containing 1	NM_024928	79991	24	1	-0.109278	-0.094732	-0.0922074	-0.0527552	-0.216258	-0.221387	-0.175183	-0.337249	-0.22311	-0.131996	-0.0977938	-0.0189002	-0.279128	-0.467429	-0.293131	-0.416853	-0.473416	-0.105272	-0.153351	-0.192256	-0.268541	-0.0227201	-0.327745
HUXP1088D12	ZNF614	zinc finger protein 614	NM_025040	80110	24	1	0.0347654	-0.233797	-0.146221	NaN	-0.338802	0.0588937	-0.103836	NaN	0.1686	-0.321928	-0.0149503	NaN	-0.655352	-0.226771	0.0334747	-0.471451	-0.169925	NaN	-0.423211	-0.259387	-0.105933	-0.488191	-0.18206
HUXP1128C10	DYNLRB1	dynein, light chain, roadblock-type 1	NM_014183	83658	24	1	-0.211716	-0.231112	-0.110068	-0.0308135	-0.133541	-0.0929494	-0.23098	-0.216976	-0.267363	-0.186512	-0.282693	-0.265649	-0.259788	-0.53551	-0.144916	-0.206525	-0.256973	-0.29035	-0.107693	-0.213622	-0.0265767	-0.423499	-0.351991
HUXP1054E09	NIBP	NIK and IKK{beta} binding protein	NM_031466	83696	24	1	-0.200987	-0.246377	-0.250444	-0.141661	-0.0074558	-0.214594	-0.250651	0.0114048	-0.188857	-0.242075	-0.255097	-0.264273	-0.158877	-0.320901	-0.377847	-0.179706	-0.259087	-0.254241	-0.0571439	-0.120714	-0.278716	-0.239827	-0.270735
HUXP1055E10	L3MBTL2	l(3)mbt-like 2 (Drosophila)	NM_001003689	83746	24	1	-0.0306606	-0.0928022	-0.251384	-0.302563	-0.172131	-0.0581811	-0.0710562	-0.213174	-0.220806	0.023459	-0.0836161	-0.101361	-0.0451585	-0.175462	-0.164229	-0.335897	-0.165809	-0.199531	-0.400646	-0.225138	-0.401473	-0.0282337	-0.217477
HUXP1167B10	TMPIT	transmembrane protein induced by tumor necrosis factor alpha	NM_031925	83862	24	1	0.0106705	-0.0714954	0.0573205	-0.0634852	0.00976144	-0.167963	0.0390513	-0.229184	0.0786916	-0.197515	-0.153923	-0.150442	-0.118962	-0.239943	0.00984649	-0.460727	-0.21229	-0.29112	-0.361878	-0.123338	-0.288239	-0.398417	-0.220244
HUXP1108F12	TMEM107	transmembrane protein 107	AF311338	84314	24	1	-0.16601	0.15788	0.036876	NaN	-0.1836	-0.0813001	0.0869833	-0.346651	NaN	-0.350497	-0.28703	-0.197939	-0.38037	0.00826762	0.118181	-0.442005	-0.263034	NaN	-0.246794	-0.476149	-0.460974	NaN	-0.00998409
HUXP1009A06	LOC84661	dpy-30-like protein	NM_032574	84661	24	1	-0.18024	-0.0755124	-0.0572987	-0.078381	0.193748	-0.158573	-0.209453	-0.192131	-0.263034	-0.24381	-0.179706	-0.06286	-0.369093	-0.445497	-0.374066	-0.469305	-0.304855	-0.366428	-0.22281	-0.0464676	-0.240593	-0.232896	0.0443941
HUXP1030F07	FAM104A	family with sequence similarity 104, member A	NM_032837	84923	24	1	-0.126218	-0.250227	-0.250737	-0.0265418	-0.0424681	0.0522945	0.0117293	-0.0592972	-0.339585	-0.130961	-0.300509	-0.104064	-0.242341	-0.449448	-0.129026	-0.136615	-0.102483	-0.112861	-0.177906	-0.191589	-0.304441	-0.227878	-0.183275
HUXP1067B09	WDR34	WD repeat domain 34	NM_052844	89891	24	1	-0.212994	-0.206451	-0.211919	-0.0346957	-0.230679	-0.00946033	-0.295456	-0.304581	-0.259087	-0.244685	-0.217152	-0.244734	-0.35202	-0.480064	-0.244367	-0.386444	-0.220266	-0.233314	-0.0787771	-0.179484	-0.341037	-0.203163	-0.248788
HUXP1201A08	C12orf23	chromosome 12 open reading frame 23	NM_152261	90488	24	1	-0.119391	-0.248612	-0.263715	-0.253286	0.0271486	0.0657168	0.069508	-0.179746	-0.199425	-0.254643	-0.264349	-0.272505	-0.305279	-0.240868	-0.0223721	-0.210287	-0.248226	-0.271839	-0.220887	-0.233338	-0.170435	-0.3094	-0.344039
HUXP1167E02	C14orf32	chromosome 14 open reading frame 32	NM_144578	93487	24	1	-0.16572	-0.0951572	-0.195583	-0.234355	-0.0885102	0.0402789	0.0175635	0.0931094	0.150158	-0.0768321	-0.0789883	-0.0440712	-0.355922	-0.171953	-0.183116	-0.279966	-0.126979	-0.253356	-0.253566	-0.283542	-0.396842	-0.229777	-0.30928
HUXP1125C03	UHMK1	U2AF homology motif (UHM) kinase 1	Hs.127310	127933	24	1	-0.257997	0.0641983	-0.0842689	-0.113108	-0.125288	-0.195762	-0.199392	-0.18113	-0.450056	-0.0267527	0.120192	-0.0535101	-0.186576	-0.356144	-0.138116	-0.398419	-0.246579	-0.128324	-0.110387	-0.215223	-0.427862	-0.310482	-0.239029
HUXP1069A11	LOC152485	hypothetical protein LOC152485	AL117519	152485	24	1	-0.146923	-0.10089	-0.0766213	0.0331923	-0.0740006	-0.126361	-0.040386	-0.186357	-0.0533046	-0.0785956	-0.0777552	-0.0659392	-0.180508	-0.314405	-0.262673	-0.16567	-0.219228	-0.198996	-0.129635	-0.323663	-0.243973	-0.387849	-0.221453
HUXP1011D07	IGSF4C	immunoglobulin superfamily, member 4C	NM_145296	199731	24	1	0.0486348	-0.11414	0.0413839	-0.0539776	0.049213	-0.0389941	-0.111508	0.103269	-0.185867	-0.0262315	-0.238881	-0.00651331	-0.196397	-0.368596	-0.313935	-0.321928	-0.275341	-0.145851	-0.180572	-0.17585	-0.43837	-0.312384	-0.210218
HUXP1144F08	ALDH2	aldehyde dehydrogenase 2 family (mitochondrial)	NM_000690	217	25	1	-0.0961722	-0.252772	-0.0515107	-0.213429	-0.139438	-0.100997	-0.130402	0.0891995	-0.186388	-0.384533	-0.40888	-0.523258	-0.519495	-0.261537	-0.58307	-0.397108	-0.42517	-0.302776	-0.448677	-0.231488	0.203382	0.148437	-0.328346
HUXP1036G09	APOA1	apolipoprotein A-I	NM_000039	335	25	1	-0.244423	-0.383341	-0.158969	-0.26319	-0.131615	-0.183151	-0.256001	0.0275531	-0.380232	-0.30972	-0.419209	-0.479887	-0.209411	-0.4321	-0.420764	-0.284173	-0.461287	-0.371134	-0.325204	-0.309216	-0.00445506	0.143405	-0.405738
HUXP1011F08	RHOG	ras homolog gene family, member G (rho G)	NM_001665	391	25	1	-0.194154	-0.231069	-0.123198	-0.0998058	-0.130433	-0.140429	-0.150265	0.151617	-0.294183	-0.280993	-0.472787	-0.523944	-0.278384	-0.460476	-0.395689	-0.164593	-0.505328	-0.265318	-0.148838	-0.256393	0.335615	0.0510295	-0.200158
HUXP1163G09	CD44	CD44 molecule (Indian blood group)	NM_001001392	960	25	1	-0.0459834	-0.41146	-0.117449	-0.203364	0.00359775	-0.198142	0.0370322	0.240124	-0.136941	-0.152003	-0.441618	-0.43179	-0.410277	-0.311817	-0.47227	-0.216888	-0.463041	NaN	-0.300504	-0.360509	0.430098	0.41267	-0.045076
HUXP1034E06	CLN5	ceroid-lipofuscinosis, neuronal 5	NM_006493	1203	25	1	-0.323308	-0.00526532	0.0239032	-0.0924969	-0.290019	-0.0885367	-0.1695	0.237768	-0.561147	-0.269933	-0.243729	-0.192645	-0.168454	-0.396353	-0.415037	0.0119726	-0.315396	-0.292553	-0.00437844	-0.0912165	0.202389	-0.115715	-0.109101
HUXP1189H07	CPM	carboxypeptidase M	NM_001005502	1368	25	1	-0.0675999	-0.264777	-0.000563223	-0.351746	-0.17196	-0.193454	-0.071911	-0.0757645	-0.337758	-0.280246	-0.230442	-0.513265	-0.347923	-0.504028	-0.267761	-0.369368	-0.0999631	-0.232271	-0.319961	-0.360195	-0.0490283	-0.023785	-0.397835
HUXP1010G04	CST3	cystatin C (amyloid angiopathy and cerebral hemorrhage)	NM_000099	1471	25	1	-0.0893772	-0.351635	-0.190664	-0.264088	-0.302264	-0.286121	-0.334001	-0.0306817	-0.441287	-0.297572	-0.490218	-0.498529	-0.213989	-0.361552	-0.421911	-0.21183	-0.376925	-0.282767	-0.286465	-0.346973	-0.025499	0.198516	-0.506201
HUXP1011G09	CTSD	cathepsin D	Hs.121575	1509	25	1	-0.161401	-0.365935	-0.155633	-0.342036	-0.340359	-0.354445	-0.23366	0.199243	-0.271947	-0.352881	-0.442923	-0.299071	-0.304343	-0.512131	-0.484403	-0.327507	-0.421396	0.039856	-0.325986	-0.226842	0.0399664	0.136444	-0.561982
HUXP1007C12	CYP17A1	cytochrome P450, family 17, subfamily A, polypeptide 1	NM_000102	1586	25	1	-0.162675	-0.334228	-0.0712349	-0.166029	-0.212429	-0.233217	-0.28399	-0.0239899	-0.345485	-0.389537	-0.442918	-0.500452	-0.301197	-0.269217	-0.496643	-0.302847	-0.315125	-0.294121	-0.331879	-0.224904	0.141428	0.175219	-0.409767
HUXP1212A03	CD55	CD55 molecule, decay accelerating factor for complement (Cromer blood group)	NM_000574	1604	25	1	-0.214088	-0.506702	-0.150225	-0.314219	-0.304777	-0.261014	-0.229658	-0.0428186	-0.424847	-0.432914	-0.511844	-0.275403	-0.240255	-0.342282	-0.404456	-0.059958	-0.415816	-0.331844	-0.23257	-0.161026	0.506302	0.0485759	-0.0963106
HUXP1053D03	FCGRT	Fc fragment of IgG, receptor, transporter, alpha	NM_004107	2217	25	1	-0.0786098	-0.21042	-0.113139	-0.075027	-0.348804	-0.207096	-0.17669	0.00502682	-0.185613	-0.329006	-0.225832	-0.476965	-0.212519	-0.239291	-0.314959	-0.284525	-0.381945	-0.272766	-0.138461	-0.00520829	0.268338	0.305292	-0.421138
HUXP1163C01	FOS	v-fos FBJ murine osteosarcoma viral oncogene homolog	NM_005252	2353	25	1	-0.211742	-0.270464	-0.0750094	-0.264046	-0.0914745	-0.133438	-0.0778195	0.150025	-0.209453	-0.430634	-0.522999	-0.495842	-0.289294	-0.199408	-0.365761	-0.27486	-0.437035	NaN	-0.386017	-0.370033	0.309328	-0.063244	-0.435252
HUXP1086A09	FRZB	frizzled-related protein	NM_001463	2487	25	1	-0.13245	-0.357157	-0.069709	-0.0954196	-0.131245	-0.105353	0.0428131	0.159871	-0.0664954	-0.17148	-0.427953	-0.250407	-0.121991	-0.331206	-0.485427	-0.100111	-0.823122	-0.432959	-0.384143	-0.33665	NaN	0.00871722	-0.197037
HUXP1106A03	GNAI2	guanine nucleotide binding protein (G protein), alpha inhibiting activity polypeptide 2	NM_002070	2771	25	1	0.00359775	-0.201599	-0.104552	-0.236217	-0.114287	-0.108813	-0.141111	0.210645	-0.200836	-0.29469	-0.657492	-0.733702	-0.376273	-0.343238	-0.5453	-0.364782	-0.431837	-0.081063	0.101808	0.0164505	0.849666	0.468269	-0.0345009
HUXP1035F07	INPP1	inositol polyphosphate-1-phosphatase	NM_002194	3628	25	1	-0.155651	-0.259767	-0.179661	-0.181063	-0.150425	-0.155528	-0.134737	0.07648	-0.440083	-0.344848	-0.401532	-0.376074	-0.286683	-0.223629	-0.439989	-0.0577351	-0.311743	-0.366753	-0.224919	-0.137977	0.0799405	0.0365074	-0.284899
HUXP1056E09	ITPKB	inositol 1,4,5-trisphosphate 3-kinase B	NM_002221	3707	25	1	-0.130397	-0.396096	-0.154034	-0.0126276	-0.118239	-0.136736	-0.19583	-0.0276785	-0.20057	-0.262377	-0.329889	-0.270398	-0.442478	-0.357813	-0.349628	-0.229596	-0.351871	-0.320634	-0.294834	-0.0221768	-0.0151069	0.0573875	-0.228441
HUXP1040G04	LRMP	lymphoid-restricted membrane protein	NM_006152	4033	25	1	0.0242475	-0.0740006	-0.0888093	0.0671142	-0.197192	-0.152851	-0.0357342	-0.279574	-0.501881	-0.192645	-0.13234	-0.495325	-0.191275	-0.190822	-0.634867	-0.297968	-0.308631	-0.318822	-0.368387	-0.395138	0.26738	0.141472	-0.0300572
HUXP1162B12	MT3	metallothionein 3 (growth inhibitory factor (neurotrophic))	NM_005954	4504	25	1	-0.153173	-0.134813	-0.00827948	-0.117479	-0.11112	-0.143071	-0.103386	-0.0431739	-0.342619	-0.282304	-0.204228	-0.435175	0.0111982	-0.200412	-0.40952	-0.267025	-0.289213	-0.418416	-0.285378	-0.536411	-0.120976	0.141698	-0.118603
HUXP1055C10	NEFM	neurofilament, medium polypeptide 150kDa	NM_005382	4741	25	1	-0.21394	-0.361519	-0.16373	-0.249476	-0.171554	-0.142575	-0.259697	-0.00771497	-0.531238	-0.315949	-0.446167	-0.37808	-0.19129	-0.412871	-0.301688	-0.262668	-0.253135	-0.239636	-0.266092	-0.400213	-0.178193	0.279662	-0.545724
HUXP1046E10	NINJ1	ninjurin 1	NM_004148	4814	25	1	-0.200726	-0.295319	-0.216492	-0.234766	-0.153518	-0.247728	-0.269819	0.0924143	-0.301813	-0.299325	-0.529662	-0.490533	-0.395317	-0.381682	-0.499256	-0.248458	-0.519388	-0.026383	-0.397434	-0.376007	0.287958	0.251132	-0.311046
HUXP1069C10	PDHB	pyruvate dehydrogenase (lipoamide) beta	NM_000925	5162	25	1	-0.181838	-0.486607	-0.185746	-0.310568	-0.210859	-0.124515	-0.278494	0.19773	-0.0354488	-0.127461	-0.489038	-0.353637	-0.181838	-0.567685	-0.445032	-0.271104	-0.500739	-0.243557	-0.32071	-0.306014	0.0663425	0.20553	-0.479808
HUXP1080B07	CFP	complement factor properdin	NM_002621	5199	25	1	-0.264703	-0.215677	-0.163408	-0.240841	-0.257937	-0.235536	-0.510358	0	-0.44501	-0.374124	-0.518954	-0.572839	-0.233784	-0.203391	-0.533824	-0.306331	-0.352106	-0.282442	-0.24814	-0.291399	0.3254	0.229986	-0.306103
HUXP1161F03	SERPINA1	serpin peptidase inhibitor, clade A (alpha-1 antiproteinase, antitrypsin), member 1	NM_001002236	5265	25	1	-0.169281	-0.24217	-0.191939	-0.227372	-0.233672	-0.19592	-0.377514	0.02966	-0.355967	-0.345203	-0.418713	-0.481869	-0.295555	-0.48447	-0.537086	-0.230679	-0.432207	-0.429113	-0.225115	-0.182478	0.291889	0.157656	0.146752
HUXP1046D02	PLOD1	procollagen-lysine 1, 2-oxoglutarate 5-dioxygenase 1	NM_000302	5351	25	1	0.198736	-0.156402	-0.205658	0.0513012	0.232016	-0.23671	-0.325213	0.055546	-0.338048	-0.251979	-0.356371	-0.368754	-0.224706	-0.253484	-0.36899	-0.103836	-0.436814	-0.317402	-0.324668	-0.5115	-0.231055	-0.0246095	-0.213117
HUXP1053D04	PRKCZ	protein kinase C, zeta	NM_002744	5590	25	1	-0.199124	-0.218655	0.0250547	-0.324752	-0.0870406	-0.134037	-0.175269	0.160532	-0.343058	-0.47624	-0.431247	-0.446135	-0.385846	-0.263564	-0.291752	-0.178937	-0.245138	-0.329453	-0.323913	-0.23351	0.0140205	0.10211	-0.338169
HUXP1017F01	PRNP	prion protein (p27-30) (Creutzfeldt-Jakob disease, Gerstmann-Strausler-Scheinker syndrome, fatal familial insomnia)	NM_000311	5621	25	1	-0.173086	-0.415037	-0.0280314	-0.348194	0.0857923	-0.219396	0.104367	0.461162	-0.283965	-0.199421	-0.654967	-0.258158	-0.641317	-0.0435207	-0.470443	-0.0085115	-0.592606	-0.219566	-0.1753	-0.773421	0.669653	0.730512	0.0428488
HUXP1055B01	PTPRF	protein tyrosine phosphatase, receptor type, F	NM_002840	5792	25	1	-0.324311	-0.157101	0.641313	-0.270452	-0.227234	0.0196288	-0.123382	0.156119	-0.446018	-0.333126	-0.30189	-0.323697	-0.171766	-0.460361	-0.437809	-0.121562	-0.296471	-0.422501	-0.23725	-0.184122	NaN	-0.158262	-0.466568
HUXP1018C05	SPARC	secreted protein, acidic, cysteine-rich (osteonectin)	NM_003118	6678	25	1	-0.150341	-0.279144	-0.170208	-0.333002	-0.245416	-0.212545	-0.223706	-0.0809997	-0.31942	-0.23875	-0.318322	-0.371214	-0.209905	-0.328446	-0.454646	-0.211719	-0.347328	-0.427685	-0.387582	-0.333566	-0.235435	0.214854	-0.431124
HUXP1048E05	TAP1	transporter 1, ATP-binding cassette, sub-family B (MDR/TAP)	NM_000593	6890	25	1	-0.119622	-0.431187	-0.289353	-0.413312	-0.258868	-0.245435	-0.236474	0.0261883	-0.434457	-0.319189	-0.560751	-0.595323	-0.436407	-0.42207	-0.430573	-0.238809	-0.395929	-0.281292	-0.244728	-0.196973	0.211269	0.0102198	-0.27023
HUXP1023H04	TBXAS1	thromboxane A synthase 1 (platelet, cytochrome P450, family 5, subfamily A)	NM_001061	6916	25	1	-0.123197	-0.313606	-0.0641729	-0.288655	-0.120045	-0.0864721	-0.132916	0.129557	-0.261576	-0.255968	-0.490266	-0.483517	-0.363824	-0.284166	-0.39822	-0.194515	-0.411283	-0.358606	-0.169982	-0.122632	0.602104	0.106585	-0.152933
HUXP1105F03	NR2F1	nuclear receptor subfamily 2, group F, member 1	X12795	7025	25	1	0.341871	-0.274332	-0.293966	-0.402347	-0.113063	-0.276604	-0.231698	-0.0516328	-0.236067	-0.442174	-0.577122	-0.550197	-0.274383	-0.36113	-0.827223	-0.0527705	-0.660748	-0.366184	0.189971	-0.279493	0.0679768	0.196647	-0.367618
HUXP1001G11	TNNC2	troponin C type 2 (fast)	NM_003279	7125	25	1	-0.150159	-0.274965	-0.134963	-0.23224	-0.209228	-0.113529	-0.184093	0.0923864	-0.333864	-0.309412	-0.316474	-0.433637	-0.269968	-0.368116	-0.399983	-0.257317	-0.274251	-0.342455	-0.244534	-0.166992	0.339692	0.0518833	-0.366035
HUXP1118E09	TNFAIP2	tumor necrosis factor, alpha-induced protein 2	NM_006291	7127	25	1	-0.236285	-0.38309	-0.219507	-0.257537	-0.182244	-0.241994	-0.193173	0.0510051	-0.277941	-0.382652	-0.552056	-0.543081	-0.391985	-0.452332	-0.31159	0.262422	-0.383426	-0.295973	-0.185947	-0.430753	0.0624082	0.22506	-0.0389397
HUXP1019H11	TYROBP	TYRO protein tyrosine kinase binding protein	NM_198125	7305	25	1	-0.150093	-0.275526	-0.190129	-0.267506	-0.2011	-0.239196	-0.212582	0.0197972	-0.400191	-0.246692	-0.489322	-0.370039	-0.268625	-0.408737	-0.401406	-0.151726	-0.334647	-0.0554839	0.0454019	-0.205752	0.550927	-0.117966	-0.0273859
HUXP1109G01	WHSC1	Wolf-Hirschhorn syndrome candidate 1	AK026939	7468	25	1	-0.089809	-0.325564	0.12933	-0.140381	-0.193648	-0.22219	-0.231971	0.0007158	-0.219057	-0.193001	-0.40687	-0.296803	-0.25494	-0.382925	-0.149323	-0.00361384	-0.364929	-0.373004	-0.397273	-0.720648	-0.326044	0.0315639	-0.459934
HUXP1132D11	UXT	ubiquitously-expressed transcript	NM_004182	8409	25	1	-0.160822	-0.247186	-0.0163827	-0.2567	-0.133143	-0.103026	-0.123991	0.138847	-0.141768	-0.22662	-0.395781	-0.503204	-0.388837	-0.256944	-0.296707	-0.31523	-0.419312	-0.403967	-0.363599	-0.163755	-0.208313	-0.00782314	-0.349779
HUXP1044B07	NR1I2	nuclear receptor subfamily 1, group I, member 2	NM_033013	8856	25	1	-0.170204	-0.310719	0.0239258	-0.207595	-0.19872	-0.0878836	-0.236685	0.0901978	-0.263881	-0.31034	-0.538612	-0.312657	-0.19664	-0.302796	-0.507558	-0.380994	-0.322856	-0.394463	-0.15477	-0.276518	NaN	-0.0222528	-0.26457
HUXP1089B02	TAF1C	TATA box binding protein (TBP)-associated factor, RNA polymerase I, C, 110kDa	NM_139353	9013	25	1	-0.0522277	-0.414308	-0.17073	-0.391267	-0.194647	-0.0596453	-0.192862	0.070348	-0.0783556	-0.32114	-0.278138	-0.581566	-0.285896	-0.100656	-0.37238	-0.257527	-0.364126	-0.174044	-0.45449	-0.35327	0.101283	0.242023	-0.4439
HUXP1015H07	CD83	CD83 molecule	NM_004233	9308	25	1	-0.122063	-0.268489	-0.0698679	-0.246803	-0.157891	-0.298596	-0.100335	0.0422701	-0.206561	-0.326719	-0.422549	-0.556509	-0.460307	-0.351497	-0.329682	-0.142814	-0.380236	-0.203742	-0.352691	-0.269122	0.165059	0.312578	0.0739297
HUXP1124G05	GRHPR	glyoxylate reductase/hydroxypyruvate reductase	NM_012203	9380	25	1	0.0780025	-0.159282	-0.25634	-0.121186	-0.0935408	-0.517848	-0.386417	-0.351844	-0.17897	-0.199309	-0.193772	-0.609625	-0.223803	-0.218047	-0.38405	-0.448274	-0.496153	-0.552541	-0.615857	-0.30841	-0.0163018	0.293731	-0.115477
HUXP1005H02	EEF1E1	eukaryotic translation elongation factor 1 epsilon 1	NM_004280	9521	25	1	-0.22356	-0.328238	-0.103937	-0.155928	-0.200981	-0.118804	-0.247887	0.0587128	-0.414725	-0.270834	-0.334495	-0.35136	-0.194245	-0.444932	-0.381108	-0.343274	-0.370573	-0.333506	-0.336552	-0.263585	-0.248572	0.0217692	-0.233215
HUXP1161B07	TBC1D5	TBC1 domain family, member 5	NM_014744	9779	25	1	0.00887815	-0.045324	-0.136204	-0.0850558	-0.267284	-0.153157	-0.173648	0.248388	-0.185867	-0.562936	-0.354917	-0.343145	-0.217722	-0.118263	-0.448204	-0.496607	-0.480626	NaN	-0.212153	-0.514573	0.188445	0.185032	-0.108641
HUXP1023F11	SCRN1	secernin 1	NM_014766	9805	25	1	-0.192645	0.0100537	-0.337035	-0.526069	0.295776	-0.123148	-0.0420641	-0.158065	NaN	NaN	-0.220126	NaN	-0.297266	-0.11984	-0.343484	-0.26628	-0.549085	-0.135883	-0.0708213	NaN	NaN	0.377701	-0.33985
HUXP1033B01	THRAP4	thyroid hormone receptor associated protein 4	NM_014815	9862	25	1	-0.170206	-0.119495	-0.038889	-0.111438	-0.0482091	-0.150825	-0.165661	0.00369764	-0.214963	-0.276458	-0.26623	-0.500276	-0.106699	-0.254702	-0.353897	-0.17585	-0.339398	-0.272612	-0.319984	-0.271901	-0.122445	-0.0120584	-0.241125
HUXP1106C07	RBM8A	RNA binding motif protein 8A	AL049219	9939	25	1	-0.232523	-0.0629142	-0.169925	-0.270854	-0.181113	-0.152558	-0.0539388	-0.156402	-0.100305	0.0241461	-0.152003	-0.678072	0.105739	-0.462734	-0.439112	-0.0958158	-0.463656	-0.280628	-0.169925	-0.18233	0.155736	0.303907	-0.377975
HUXP1017D12	ARPC5	actin related protein 2/3 complex, subunit 5, 16kDa	NM_005717	10092	25	1	-0.154303	-0.298538	-0.175529	-0.26283	-0.219218	-0.265358	-0.186442	-0.089208	-0.382847	-0.361044	-0.313467	-0.335197	-0.341037	-0.399405	-0.469145	-0.280357	-0.445926	-0.308355	-0.0713201	-0.328915	0.05428	0.0534914	-0.240455
HUXP1003G11	SERF2	small EDRK-rich factor 2	NM_001018108	10169	25	1	0.0762634	-0.195553	0.0752707	-0.00848722	0.012905	-0.0310695	-0.0492355	0.29613	-0.238828	-0.196802	-0.346112	-0.670585	-0.126484	-0.235212	-0.314949	-0.0933087	-0.252722	-0.250248	-0.341793	-0.223353	0.562708	0.292472	-0.225224
HUXP1015G07	ZNF267	zinc finger protein 267	NM_003414	10308	25	1	-0.110647	-0.337481	-0.147415	-0.425118	-0.241331	-0.244563	-0.168937	0	-0.166582	-0.203209	-0.440399	-0.567206	-0.473534	-0.228798	-0.342608	-0.295786	-0.342299	-0.335603	-0.336171	-0.294674	0.154422	0.256637	-0.259387
HUXP1035A05	TNIP1	TNFAIP3 interacting protein 1	NM_006058	10318	25	1	-0.162125	-0.00112403	-0.109355	-0.130037	-0.0572573	-0.111906	-0.167475	0.0297127	-0.306132	-0.363392	-0.424934	-0.506022	-0.370875	-0.257969	-0.371861	-0.11152	-0.158071	-0.326772	-0.258716	-0.300938	0.477322	0.249772	-0.224454
HUXP1030C12	NOD1	nucleotide-binding oligomerization domain containing 1	NM_006092	10392	25	1	-0.160134	-0.199628	0	-0.126793	-0.236905	-0.212197	-0.137119	0.0427045	-0.0938669	-0.292393	-0.377948	-0.588062	-0.109903	-0.129959	-0.367509	-0.261993	-0.449079	-0.260764	-0.0995357	-0.36257	0.132307	0.258312	-0.301944
HUXP1056F03	TRIM3	tripartite motif-containing 3	NM_006458	10612	25	1	-0.195693	-0.398191	0.0805879	-0.0932976	-0.172115	-0.204988	-0.231427	0.17824	-0.279481	-0.358608	-0.393531	-0.476718	-0.550548	-0.421679	-0.451145	-0.247978	-0.384509	-0.357711	-0.412963	-0.254339	0.159446	0.174184	-0.344044
HUXP1036F01	DSTN	destrin (actin depolymerizing factor)	NM_006870	11034	25	1	-0.326408	-0.140598	-0.137779	-0.268803	-0.210516	-0.0901781	-0.151172	0.0614823	-0.387539	-0.0481708	-0.401983	-0.414473	-0.379318	-0.36959	-0.421879	-0.117039	-0.395733	-0.109001	-0.29334	-0.336343	-0.0578602	0.233314	-0.347842
HUXP1038H02	DUSP14	dual specificity phosphatase 14	NM_007026	11072	25	1	-0.253572	-0.338769	-0.115265	-0.207867	0.0915415	-0.159123	-0.145506	0.00700339	-0.319649	-0.371367	-0.445176	-0.474526	-0.280464	-0.225954	-0.519971	-0.0701261	-0.299701	-0.31267	-0.296617	-0.25913	0.00632762	0.105751	-0.257634
HUXP1060C01	SCRG1	scrapie responsive protein 1	NM_007281	11341	25	1	-0.175284	-0.385208	-0.190641	-0.329746	-0.227984	-0.257945	-0.211528	0.11296	-0.27922	-0.219931	-0.431777	-0.523562	-0.18512	-0.322256	-0.493293	-0.244197	-0.405328	-0.099679	-0.469186	-0.496793	0.201882	0.278873	-0.425521
HUXP1001H08	PRPF6	PRP6 pre-mRNA processing factor 6 homolog (S. cerevisiae)	NM_012469	24148	25	1	-0.302595	-0.132808	-0.0995092	-0.317522	0.0669638	-0.25386	-0.174737	0.0963876	-0.367456	-0.362191	-0.468118	-0.451479	-0.303511	-0.295077	-0.227586	-0.147452	-0.553042	-0.229019	-0.366945	-0.386618	-0.187325	0.129221	-0.154471
HUXP1091F10	LRP10	low density lipoprotein receptor-related protein 10	NM_014045	26020	25	1	-0.284436	-0.472495	-0.254368	-0.284795	-0.389625	-0.274342	-0.20848	0.00585669	-0.303616	-0.391302	-0.626002	-0.593405	-0.341402	-0.422395	-0.816778	-0.105652	-0.606989	-0.243984	0.0467844	-0.366722	0.137974	0.247521	0.0150206
HUXP1168B12	PCOLCE2	procollagen C-endopeptidase enhancer 2	NM_013363	26577	25	1	-0.214354	-0.356637	-0.194617	-0.471752	-0.336865	-0.273579	-0.294884	-0.13714	-0.439645	-0.340721	-0.510315	-0.46347	-0.376389	-0.341081	-0.444315	-0.200992	-0.449745	-0.429597	-0.214193	-0.418385	0.381387	-0.00486849	-0.314167
HUXP1002G04	TRIB2	tribbles homolog 2 (Drosophila)	NM_021643	28951	25	1	-0.246799	-0.152587	-0.0474868	-0.127741	-0.00966865	-0.115615	-0.155724	0.0459862	-0.352607	-0.29612	-0.28937	-0.316991	-0.117512	-0.32141	-0.441873	-0.180954	-0.285037	-0.317148	-0.209491	-0.169925	0.0182046	0.0513721	0.041878
HUXP1042A05	STRN4	striatin, calmodulin binding protein 4	NM_013403	29888	25	1	-0.226406	-0.26628	-0.211385	-0.0949658	-0.199364	-0.172677	-0.171112	0.0466366	-0.33743	-0.249089	-0.346147	-0.346446	-0.174679	-0.404506	-0.268892	0.0612664	-0.401634	-0.172602	0.0108678	-0.074664	0.146228	0.0524501	-0.236138
HUXP1022D07	NAGPA	N-acetylglucosamine-1-phosphodiester alpha-N-acetylglucosaminidase	NM_016256	51172	25	1	-0.137974	-0.281542	-0.15225	-0.398058	-0.170213	-0.18742	-0.133378	0.0618526	-0.17908	-0.222268	-0.40879	-0.507002	-0.394106	-0.149642	-0.515538	-0.177029	-0.50974	-0.336679	-0.278723	-0.306028	-0.0145158	0.0783202	-0.281885
HUXP1004F04	VRK3	vaccinia related kinase 3	NM_016440	51231	25	1	-0.156576	-0.313699	-0.118738	-0.213192	-0.166373	-0.275889	-0.271774	0.0576311	-0.461331	-0.389255	-0.369595	-0.507035	-0.142305	-0.266913	-0.228753	-0.107384	-0.32436	-0.21935	-0.229175	-0.22093	0.0243059	0.0213963	-0.253234
HUXP1015E06	EDD1	E3 ubiquitin protein ligase, HECT domain containing, 1	NM_015902	51366	25	1	-0.178235	-0.219833	-0.15473	-0.256775	-0.213595	-0.193467	-0.115268	0.111693	-0.254549	-0.263596	-0.254172	-0.441853	-0.369422	-0.150543	-0.398256	-0.313626	-0.302112	-0.28723	-0.170036	-0.0205678	-0.000658014	-0.0212625	-0.275843
HUXP1042B10	ZNF589	zinc finger protein 589	NM_016089	51385	25	1	-0.213364	-0.247093	-0.0132156	-0.101283	-0.219623	-0.239951	-0.276303	-0.0946369	-0.39689	-0.180374	-0.303298	-0.143646	-0.176878	-0.596893	-0.365995	-0.0931094	-0.228819	-0.185973	-0.168929	-0.0401571	0.206451	-0.186413	-0.102726
HUXP1056B06	TPCN1	two pore segment channel 1	Hs.524763	53373	25	1	-0.220898	-0.387061	-0.27684	-0.219468	-0.223318	-0.280069	-0.262917	0	-0.459669	-0.308181	-0.442411	-0.556607	-0.44605	-0.539315	-0.480593	-0.337106	-0.376563	-0.27363	-0.0872202	-0.171861	0.236877	0.10768	-0.320829
HUXP1160H02	PQLC2	PQ loop repeat containing 2	NM_017765	54896	25	1	-0.102658	-0.349798	0.0286069	-0.167398	-0.158627	-0.126095	-0.179146	0.118679	-0.263875	-0.419897	-0.523169	-0.581884	-0.416731	-0.225018	-0.500982	-0.369695	-0.312198	-0.319748	-0.432566	-0.329705	0.111748	0.176654	-0.372614
SHR020061026A04	FAM48A	family with sequence similarity 48, member A	NM_001014286	55578	25	1	-0.108524	-0.440573	-0.213464	NaN	-0.233334	-0.227868	-0.221558	NaN	-0.552541	-0.367732	-0.223438	NaN	-0.161751	0.197301	-0.198838	0.112317	-0.271302	NaN	-0.307734	-0.458235	0.125531	0.741467	-0.24952
HUXP1162F01	POMGNT1	protein O-linked mannose beta1,2-N-acetylglucosaminyltransferase	NM_017739	55624	25	1	-0.0649447	-0.27162	-0.172533	-0.129917	-0.258823	-0.251605	-0.227952	0.0949484	-0.300889	-0.31392	-0.454176	-0.422724	-0.2824	-0.361778	-0.447685	-0.154941	-0.451696	-0.335021	-0.251434	-0.393627	0.0854879	0.213158	-0.237788
HUXP1159H10	TMEM30A	transmembrane protein 30A	NM_018247	55754	25	1	-0.0991298	-0.278857	-0.178724	-0.0529414	-0.170254	-0.0888093	-0.197878	-0.0494521	-0.261441	-0.252975	-0.172444	-0.286805	-0.263852	-0.222627	-0.317706	-0.398273	-0.287675	-0.1561	-0.26639	0.149907	0.202779	0.211843	-0.132244
HUXP1160D05	NIT2	nitrilase family, member 2	NM_020202	56954	25	1	-0.149566	-0.265685	-0.1194	-0.141114	-0.154743	-0.163962	-0.16425	0.0411909	-0.320406	-0.356917	-0.388325	-0.411553	-0.266387	-0.167195	-0.383727	0.0227201	-0.0946369	-0.381036	-0.241978	-0.206482	0.380128	0.154208	-0.174177
HUXP1131H07	KIAA1191	KIAA1191	NM_020444	57179	25	1	-0.0999478	-0.233538	-0.0824082	-0.315823	-0.19478	-0.120439	-0.226601	0.198429	-0.295132	-0.191386	-0.309912	-0.477702	-0.468256	-0.206797	-0.476415	-0.512439	-0.304088	-0.373546	-0.368551	-0.191862	0.114026	0.189021	-0.39233
HUXP1089A06	WDR35	WD repeat domain 35	NM_020779	57539	25	1	-0.0292054	-0.368239	-0.0169555	-0.28357	-0.170943	-0.174053	-0.0890403	-0.145635	-0.253494	-0.350878	-0.286478	-0.60935	-0.374453	-0.406378	-0.263034	-0.33164	-0.384895	-0.228773	-0.292892	-0.208061	-0.179283	-0.0633199	-0.365136
HUXP1109E10	POLD4	polymerase (DNA-directed), delta 4	NM_021173	57804	25	1	-0.164229	-0.335558	-0.0945523	-0.115142	-0.118343	-0.28354	-0.162344	0.251648	-0.379655	-0.241937	-0.566857	-0.382113	-0.326228	-0.177733	-0.562048	0.315918	-0.463007	-0.0583947	0.16524	-0.186025	0.772278	0.289059	0.100128
HUXP1035H11	EXOC4	exocyst complex component 4	NM_021807	60412	25	1	-0.111687	-0.196273	-0.116889	-0.140336	-0.109637	-0.171306	-0.178724	0.106243	-0.348591	-0.371094	-0.441324	-0.463252	-0.23087	-0.184181	-0.486276	-0.120395	-0.320743	-0.321321	-0.267686	-0.255414	0.241845	0.118456	-0.21093
HUXP1122F09	SMAP1L	stromal membrane-associated protein 1-like	NM_022733	64744	25	1	-0.0835866	-0.318391	-0.321928	-0.0920482	-0.147899	-0.234221	-0.342555	-0.18023	-0.322977	-0.321928	-0.476814	-0.324962	-0.600608	-0.192237	-0.263896	-0.305908	-0.0706191	-0.0365259	-0.0355751	-0.172884	0.32275	0.321928	-0.156342
HUXP1061D10	C19orf58	chromosome 19 open reading frame 58	NM_024050	79016	25	1	0.0644887	-0.362949	-0.164572	-0.0749621	-0.208753	-0.266515	-0.116058	-0.343484	-0.400538	NaN	-0.413302	-0.453718	-0.379934	-0.383329	-0.394476	-0.233259	-0.405819	-0.232661	-0.233391	-0.230884	-0.128416	0.509861	-0.171228
HUXP1020A08	ET	hypothetical protein ET	NM_024311	79157	25	1	-0.20482	-0.365878	-0.21113	-0.2715	-0.145146	-0.166501	-0.240951	0.0618545	-0.393011	-0.244491	-0.479444	-0.467646	-0.270072	-0.367351	-0.507264	-0.0844658	-0.397552	-0.413439	-0.289472	-0.397269	0.237579	0.200944	-0.337457
HUXP1002F06	FLJ21687	PDZ domain containing, X chromosome	NM_024859	79917	25	1	-0.105147	-0.336574	-0.130949	0.0157583	-0.216663	-0.145867	-0.199571	-0.238569	-0.283793	-0.154624	-0.205274	-0.155337	-0.40068	-0.120581	-0.264456	-0.0553271	-0.139172	-0.0576728	-1.30055	-0.181276	-0.178826	0.287228	-0.284666
HUXP1083F05	ST6GALNAC5	ST6 (alpha-N-acetyl-neuraminyl-2,3-beta-galactosyl-1,3)-N-acetylgalactosaminide alpha-2,6-sialyltransferase 5	NM_030965	81849	25	1	-0.185368	-0.358971	-0.260465	-0.151533	-0.277627	-0.286536	-0.18595	-0.12821	-0.273333	-0.350907	-0.197876	-0.491543	-0.0163944	-0.405106	-0.353863	-0.152415	-0.242401	-0.43848	-0.287168	-0.600856	-0.0876239	0.109347	-0.458539
HUXP1025B02	CDCA3	cell division cycle associated 3	BC002551	83461	25	1	-0.0574283	-0.25579	-0.0133584	0.0827155	-0.179518	-0.185662	-0.218333	-0.214033	-0.307625	-0.280736	-0.389212	-0.359139	-0.424397	-0.406751	-0.258797	-0.244126	-0.407343	-0.365049	-0.286217	-0.350133	0.343954	-0.0229368	-0.371468
HUXP1116E02	SETD3	SET domain containing 3	NM_032233	84193	25	1	-0.186922	0.0726093	-0.0805476	-0.151749	-0.200733	-0.138997	-0.0302674	0.156359	-0.343024	-0.363316	-0.420902	-0.299632	-0.174013	-0.0921896	-0.333653	-0.035804	-0.258636	-0.229382	-0.251982	-0.323802	0.0587977	0.11494	-0.0165151
HUXP1162C07	SLC25A46	solute carrier family 25, member 46	NM_138773	91137	25	1	-0.141373	-0.335434	-0.138691	-0.179647	-0.126912	-0.14505	-0.210283	-0.0543856	-0.418328	-0.28102	-0.351403	-0.510149	-0.143226	-0.231072	-0.280202	-0.301262	-0.208834	-0.349813	-0.240894	-0.293645	0.0567144	-0.012446	-0.28426
HUXP1106E07	SDSL	serine dehydratase-like	NM_138432	113675	25	1	-0.0866599	-0.155619	-0.145266	-0.152789	-0.216062	-0.191287	-0.191828	0.00388605	-0.193519	-0.274525	-0.573133	-0.508076	-0.276265	-0.477308	-0.334752	-0.0860307	-0.248454	-0.275934	-0.158592	-0.248194	0.129209	0.089871	-0.166461
HUXP1195B11	ZNF550	zinc finger protein 550	Hs.180257	162972	25	1	0.244734	-0.233957	-0.182094	-0.191096	-0.310701	-0.270961	-0.39402	-0.0409303	-0.090455	-0.31034	-0.771376	-0.594947	-0.106915	-0.169925	-0.618129	0.0733167	-0.516398	-0.132755	0.148392	-0.180572	0.335867	0.268196	-0.437532
HUXP1165C11	NBPF15	neuroblastoma breakpoint family, member 15	NM_173638	284565	25	1	0.152386	-0.502586	-0.441294	-0.154822	-0.409039	-0.277787	-0.0128731	0.174029	-0.229386	-0.21036	0.120226	-0.996248	-0.378728	-0.288699	-0.639045	0.0998733	-0.669666	-0.328908	-0.338989	-0.108524	0.245857	0.796593	-0.103938
SHR020060010E01	ACYP1	acylphosphatase 1, erythrocyte (common) type	NM_203488	97	31	1	0.0209596	-0.437453	-0.161062	-0.145093	-0.499411	-0.346369	-0.376148	-0.315904	-0.371658	-0.351985	-0.170801	-0.310929	-0.584963	-0.799701	-0.306103	-0.275832	-0.254929	-0.103093	-0.382333	-0.307055	-0.610825	-0.632491	-0.606747
SHR020061019F09	BMP7	bone morphogenetic protein 7 (osteogenic protein 1)	NM_001719	655	31	1	-0.352106	-0.161502	-0.333243	-0.336812	-0.262057	-0.430634	-0.132974	-0.359896	-0.433897	-0.316333	-0.197192	-0.216037	-0.280108	-0.293446	-0.300348	-0.606767	-0.524159	-0.682518	-0.564878	-0.601264	-0.672705	-0.538866	-0.420004
SHR020060017E10	CDK2	cyclin-dependent kinase 2	NM_052827	1017	31	1	-0.0381832	-0.516111	-0.303145	-0.129394	-0.243494	-0.159308	-0.118126	-0.334154	-0.252187	-0.65085	-0.630162	-0.376376	-0.60318	-0.709099	-0.770913	-0.622682	-0.480329	-0.5025	-0.769202	-0.59018	-0.83798	-0.724765	-0.720618
HUXP1105F12	CHN1	chimerin (chimaerin) 1	CR598099	1123	31	1	-0.202308	-0.285043	-0.223351	-0.259867	-0.165586	-0.142353	-0.338802	-0.498806	-0.179979	-0.334419	-0.314511	-0.195256	-0.232977	-0.508549	-0.432959	-0.487446	-0.280901	-0.419539	-0.5025	-0.305292	-0.711374	-0.857981	-0.456858
HUXP1200D02	COL4A2	collagen, type IV, alpha 2	NM_001846	1284	31	1	-0.209607	-0.259598	-0.221252	-0.260894	-0.31697	-0.264242	-0.33244	-0.219444	-0.327808	-0.316204	-0.305678	-0.214401	-0.448699	-0.521825	-0.41687	-0.582102	-0.427528	-0.51017	-0.466192	-0.458527	-0.53979	-0.547529	-0.49285
HUXP1123C11	COX7B	cytochrome c oxidase subunit VIIb	NM_001866	1349	31	1	-0.246255	-0.290183	-0.339994	-0.450627	-0.334602	-0.215963	-0.380263	-0.209587	-0.39206	-0.391557	-0.328128	-0.193415	-0.593922	-0.261862	-0.361528	-0.741319	-0.458951	-0.445424	-0.451102	-0.325333	-0.796375	-0.700823	-0.486633
HUXP1091D03	DAG1	dystroglycan 1 (dystrophin-associated glycoprotein 1)	CR591955	1605	31	1	-0.0952158	-0.271535	-0.301645	-0.245524	-0.0959592	-0.1271	-0.152406	-0.221354	-0.175139	-0.235188	-0.357935	-0.32363	-0.595166	-0.798547	-0.655205	-0.659505	-0.137683	-0.396544	-0.301954	-0.67837	-0.58852	-1.17856	-1.00882
HUXP1029B05	DARS	aspartyl-tRNA synthetase	NM_001349	1615	31	1	-0.304953	-0.333961	-0.436495	-0.346472	-0.372762	-0.4397	-0.44124	-0.410353	-0.380143	-0.330609	-0.312405	-0.115593	-0.480133	-0.648909	-0.3017	-0.575404	-0.285636	-0.295038	-0.49251	-0.523695	-0.834322	-0.626068	-0.670538
HUXP1166A05	E2F5	E2F transcription factor 5, p130-binding	Hs.445758	1875	31	1	-0.313158	-0.310587	-0.297536	-0.51316	-0.433728	-0.338679	-0.411302	-0.398906	-0.413489	-0.518707	-0.406236	-0.309544	-0.623613	-0.565637	-0.491791	-0.825439	-0.596696	-0.547021	-0.461876	-0.420274	-0.899015	-0.850828	-0.422286
SHR020061004C01	FABP5	fatty acid binding protein 5 (psoriasis-associated)	NM_001444	2171	31	1	-0.38048	-0.0904647	-0.149848	-0.31774	-0.309684	-0.115477	-0.217785	-0.307025	-0.52693	-0.251185	-0.183641	-0.339358	-0.395649	-0.318483	-0.511809	-0.535925	-0.475638	NaN	-0.577658	-0.573735	-1.00518	-1.02445	-0.540815
HUXP1132B12	FKBP3	FK506 binding protein 3, 25kDa	NM_002013	2287	31	1	-0.220192	-0.33219	-0.251055	-0.405865	-0.265012	-0.378848	-0.440641	-0.32485	-0.422919	-0.478515	-0.343461	-0.473302	-0.549033	-0.425466	-0.306375	-0.610179	-0.523562	-0.607576	-0.321723	-0.504846	-0.831274	-1.03789	-0.642753
HUXP1125D10	GNAQ	guanine nucleotide binding protein (G protein), q polypeptide	NM_002072	2776	31	1	-0.277275	-0.452613	-0.389617	-0.250475	-0.170121	-0.0369749	-0.11811	-0.148967	-0.416102	-0.397393	-0.416356	-0.776104	-0.734665	-0.675472	-0.375596	-0.638348	-0.477631	-0.480462	-0.514354	-0.367693	-1.06637	-0.98327	-0.431424
SHR020060012F05	GRLF1	glucocorticoid receptor DNA binding factor 1	AC008755	2909	31	1	-0.304355	-0.171611	-0.0247679	-0.343587	-0.356229	-0.231483	-0.189156	-0.395737	-0.335935	-0.294925	-0.143307	-0.355481	-0.741869	-0.534384	-0.120294	-0.512993	-0.208888	-0.773724	-0.72019	-0.422995	-0.826483	-0.855764	-0.370323
HUXP1200D03	HGD	homogentisate 1,2-dioxygenase (homogentisate oxidase)	NM_000187	3081	31	1	-0.402897	-0.365474	-0.265079	-0.284231	0.0782385	0.10968	0.00196862	-0.117714	-0.430265	-0.453539	-0.487185	-0.225787	-0.576529	-0.645399	-0.34152	-0.650816	-0.343012	-0.395415	-0.364241	-0.414242	-0.562996	-0.793184	-0.507992
HUXP1037E04	ITIH2	inter-alpha (globulin) inhibitor H2	NM_002216	3698	31	1	-0.224678	-0.330518	-0.305303	-0.225394	-0.285732	-0.292489	-0.352221	-0.229606	-0.347666	-0.284196	-0.341417	-0.16221	-0.440438	-0.48238	-0.341628	-0.503956	-0.263034	-0.453318	-0.352365	-0.395748	-0.623329	-0.823458	-0.481097
HUXP1086H06	JUP	junction plakoglobin	NM_021991	3728	31	1	-0.0214797	-0.428738	-0.270529	-0.239541	-0.396201	-0.415037	-0.324962	-0.240314	-0.247012	-0.388402	-0.290156	-0.320871	-0.469485	-0.735949	-0.594008	-0.861425	-0.934905	-0.464281	-0.85427	-0.217591	-1.01187	-0.605369	-0.649503
SHR020061016D12	FADS1	fatty acid desaturase 1	NM_013402	3992	31	1	-0.11078	-0.0103234	-0.270648	-0.452768	-0.121991	-0.120854	-0.19977	-0.201996	-0.29956	-0.522953	-0.323115	-0.325486	-0.184104	-0.244307	-0.304855	-0.501398	-0.230298	-0.615989	-0.455133	-0.663717	-0.901494	-0.706269	-0.631555
HUXP1201G01	LRP5	low density lipoprotein receptor-related protein 5	NM_002335	4041	31	1	-0.182673	-0.261303	-0.364051	-0.243428	-0.217243	-0.204326	-0.226328	-0.16904	-0.213819	-0.18516	-0.276931	-0.0981014	-0.464582	-0.482658	-0.420314	-0.443251	-0.424604	-0.509894	-0.59335	-0.529572	-0.703893	-0.477576	-0.306445
HUXP1020E07	LYZ	lysozyme (renal amyloidosis)	NM_000239	4069	31	1	-0.306978	-0.461684	-0.409113	-0.532014	-0.432558	-0.358454	-0.429537	-0.480704	-0.63005	-0.736966	-0.509328	-0.272372	-0.33985	-0.435047	-0.560405	-0.632011	-0.216492	-0.574694	-0.159983	NaN	-0.479253	-0.497073	-0.557577
SHR020061008G04	MEST	mesoderm specific transcript homolog (mouse)	NM_002402	4232	31	1	-0.263981	-0.208063	-0.227629	-0.21456	-0.177085	-0.430634	-0.415037	-0.437532	-0.233957	-0.299241	-0.258425	-0.309684	-0.202756	-0.568977	-0.469862	-0.74349	-0.655352	-0.762501	-0.728087	-0.659376	-0.655665	-0.48134	-0.588451
HUXP1020D08	MKI67	antigen identified by monoclonal antibody Ki-67	NM_002417	4288	31	1	-0.244942	-0.177128	-0.321121	-0.310394	-0.231796	-0.0579247	-0.155297	-0.0885981	-0.376245	-0.343668	-0.433421	-0.166297	-0.566689	-0.5789	-0.467416	-0.665706	-0.598584	-0.554813	-0.585668	-0.642757	-1.01679	-0.954877	-0.535875
HUXP1001B07	NUCB2	nucleobindin 2	NM_005013	4925	31	1	-0.262653	-0.202826	-0.335953	-0.564373	-0.462425	-0.305059	-0.287498	-0.275562	-0.379261	-0.260764	-0.346712	-0.0479899	-0.325974	-0.433375	-0.315687	-0.646218	-0.219463	-0.738148	-0.784806	-0.502309	-1.07391	-0.693232	-0.475099
HUXP1132B08	P4HA1	procollagen-proline, 2-oxoglutarate 4-dioxygenase (proline 4-hydroxylase), alpha polypeptide I	NM_001017962	5033	31	1	-0.0218594	-0.521819	-0.307198	-0.535511	-0.32303	-0.36257	-0.378843	-0.34861	-0.459737	-0.54122	-0.560678	-0.4591	-0.343459	-0.549676	-0.222679	-0.457742	-0.492011	-0.223583	-0.412969	-0.391281	-0.693865	-0.794083	-0.593487
HUXP1105H02	PURA	purine-rich element binding protein A	NM_005859	5813	31	1	-0.182203	-0.091441	-0.312626	-0.154434	-0.367606	-0.216209	-0.40828	-0.316589	-0.344759	-0.253013	-0.247928	-0.350217	-0.578704	-0.679667	-0.398359	-0.547315	-0.370838	-0.335722	-0.308686	-0.368116	-0.449803	-0.664005	-0.392178
HUXP1078H10	RPGR	retinitis pigmentosa GTPase regulator	NM_001023582	6103	31	1	-0.307429	-0.158827	-0.285043	-0.355958	-0.483679	NaN	-0.315502	-0.483602	-0.341468	-0.275107	-0.449307	-0.602665	-0.432111	-0.52274	-0.661415	-0.815575	-0.336283	NaN	-0.595455	-0.335184	-0.555519	-0.40439	-0.450661
HUXP1111F09	RPL21	ribosomal protein L21	NM_000982	6144	31	1	-0.347521	-0.37585	-0.262024	-0.203128	-0.248675	-0.202278	-0.346254	-0.121017	-0.289741	-0.305944	-0.295944	-0.180966	-0.27785	-0.761626	-0.444477	-0.790641	-0.585503	-0.580345	-0.758835	-0.525952	-0.947347	-0.721806	-0.473749
HUXP1015G09	RPL39	ribosomal protein L39	NM_001000	6170	31	1	-0.179342	-0.518097	-0.186457	-0.462451	-0.309862	-0.111105	-0.232767	-0.206532	-0.300258	-0.400009	-0.257077	-0.232788	-0.362841	-0.273309	-0.0821836	-0.537464	-0.068484	-0.81405	-0.389195	-0.406775	-1.26461	-0.887581	-0.359801
HUXP1119C04	RPL36A	ribosomal protein L36a	NM_021029	6173	31	1	-0.213448	-0.145646	-0.168988	-0.478975	-0.333509	-0.18065	-0.264098	-0.201454	-0.297681	-0.275668	-0.298769	0.00319593	-0.438526	-0.513363	-0.206612	-0.678816	-0.303994	-0.376788	-0.500924	-0.321655	-0.859876	-0.811773	-0.417356
HUXP1075C12	RPS29	ribosomal protein S29	NM_001032	6235	31	1	-0.233845	-0.357935	-0.208829	-0.269223	-0.154787	-0.191129	-0.340979	-0.289632	-0.241985	-0.343702	-0.352423	0.0947378	-0.412759	-0.47771	-0.185319	-0.617574	-0.315602	-0.50173	-0.499601	-0.511154	-1.06835	-0.784343	-0.643297
SHR020061027A10	TAF5	TAF5 RNA polymerase II, TATA box binding protein (TBP)-associated factor, 100kDa	NM_006951	6877	31	1	-0.343377	-0.285002	-0.159282	-0.358454	-0.327431	-0.346524	-0.367486	-0.477118	-0.654671	-0.293966	-0.309449	-0.1899	-0.433976	-0.639705	-0.328172	-0.479743	-0.407543	-0.481035	-0.51101	-0.497073	-0.73262	-0.874469	-0.692585
HUXP1073H09	XBP1	X-box binding protein 1	NM_005080	7494	31	1	-0.146389	-0.378858	-0.371855	-0.612508	-0.0220938	0.00384207	-0.13841	-0.513568	-0.718572	-0.522351	-0.306799	-0.125116	-0.12328	-0.328539	-0.215524	-0.314348	-0.29606	-0.513704	-0.435638	-0.530685	-0.68247	-0.575543	-0.53
HUXP1045A08	JARID1C	jumonji, AT rich interactive domain 1C	NM_004187	8242	31	1	-0.168271	-0.377305	-0.429168	-0.387661	-0.0585522	NaN	-0.268338	-0.321928	-0.263034	-0.321928	-0.526069	-0.293196	-0.410788	-0.62975	-0.553598	-0.685891	-0.57289	NaN	-0.45391	-0.489966	-0.752562	-0.669851	-0.419539
SHR020060009G09	CDC7	cell division cycle 7 homolog (S. cerevisiae)	NM_003503	8317	31	1	-0.102787	-0.0767095	-0.174225	-0.0990474	-0.409949	-0.150176	-0.114495	-0.391483	-0.197681	-0.267851	-0.130847	-0.386634	-0.492471	-0.414506	-0.234801	-0.453394	-0.715631	-0.459432	-0.447744	-0.418658	-0.683111	-0.76275	-0.610825
HUXP1167A12	PEX3	peroxisomal biogenesis factor 3	AK025644	8504	31	1	-0.0952933	-0.0375061	-0.338788	-0.394215	-0.193215	-0.147112	0.0774963	-0.659213	-0.305574	-0.302066	0.171238	-0.497556	0.240478	-0.481785	-0.133043	-0.683645	-0.532468	-0.150304	-0.558098	-0.950435	-0.468658	-1.09272	-1.01982
HUXP1105A11	LMO4	LIM domain only 4	Hs.436792	8543	31	1	-0.293999	NaN	-0.580538	-0.323463	-0.233598	-0.0689551	-0.137549	-0.270749	-0.354133	-0.44682	-0.413371	-0.345127	-0.748498	-0.805974	-0.448905	-0.66941	-0.598052	-0.562284	-0.573895	-0.425299	-0.896414	-0.715711	-0.643731
HUXP1063F12	KHSRP	KH-type splicing regulatory protein (FUSE binding protein 2)	NM_003685	8570	31	1	-0.415037	-0.423102	-0.381966	-0.320492	-0.302699	-0.217516	-0.177861	-0.00522716	-0.268935	-0.206962	-0.305503	-0.29352	-0.574499	-0.778952	-0.693339	-0.587092	-0.649982	-0.736966	-0.628684	-0.434578	-0.765264	-0.488839	-0.716958
HUXP1163H06	SOCS2	suppressor of cytokine signaling 2	NM_003877	8835	31	1	-0.0418202	-0.368127	-0.0530184	-0.410862	-0.0975165	0.127756	-0.00666373	-0.425306	NaN	0.0911479	-0.166972	-0.169925	-0.650193	-0.61745	-0.308122	-0.82933	-0.364572	0.096676	-0.669027	-0.404696	-0.844482	-0.510962	-0.814444
HUXP1081F07	FUBP1	far upstream element (FUSE) binding protein 1	AL049951	8880	31	1	-0.165737	-0.379126	-0.438121	-0.432507	-0.726077	-0.324962	-0.187252	-0.280108	-0.452512	-0.168976	-0.21901	-0.463567	-0.447048	-0.389412	-0.286621	-0.38161	-0.546894	-0.174498	-0.351844	-0.429113	-0.882164	-0.726982	-0.666314
SHR020061019H06	PTTG1	pituitary tumor-transforming 1	NM_004219	9232	31	1	-0.161668	-0.336921	-0.308986	-0.323826	-0.202846	-0.210792	-0.203378	-0.248405	-0.253183	-0.29814	-0.380775	-0.331798	-0.554352	-0.515417	-0.397063	-0.473229	-0.525236	-0.486767	-0.54491	-0.474301	-0.443589	-0.478623	-0.34364
SHR020061028A01	ST18	suppression of tumorigenicity 18 (breast carcinoma) (zinc finger protein)	NM_014682	9705	31	1	-0.292782	-0.236674	-0.457851	-0.480391	-0.366539	-0.523562	-0.317267	-0.431553	NaN	-0.305936	-0.407806	-0.0178113	-0.415037	-0.18786	-0.348728	-0.432959	-0.40828	-0.612977	-0.676593	-0.736966	-0.817136	-0.404984	-0.527738
HUXP1080B10	CP110	CP110 protein	NM_014711	9738	31	1	-0.279617	-0.0763034	-0.135655	-0.234465	-0.290551	-0.235888	-0.243377	-0.375337	-0.390673	-0.174029	-0.164884	-0.325576	-0.197349	-0.398681	-0.330598	-0.605197	-0.221492	-0.308122	-0.421677	-0.366428	-0.59451	-0.85099	-0.511685
HUXP1010D01	LAPTM4A	lysosomal-associated protein transmembrane 4 alpha	NM_014713	9741	31	1	-0.432959	-0.113287	-0.153805	-0.464404	-0.324435	-0.438884	-0.315776	-0.309684	-0.47022	-0.249778	-0.0843163	-0.0367118	-0.453857	-0.359816	NaN	-0.470563	-0.296393	-0.366128	-0.482316	-0.613532	-0.675565	-0.504923	-0.67319
HUXP1173A11	SMNDC1	survival motor neuron domain containing 1	NM_005871	10285	31	1	-0.216594	-0.148655	-0.215416	-0.39344	-0.176207	-0.157541	-0.499267	-0.215917	-0.268171	-0.192447	-0.0584392	-0.00373755	-0.415933	-0.442863	-0.32387	-0.564905	-0.392842	-0.498166	-0.465709	-0.569596	-0.714741	-0.580795	-0.444918
HUXP1060C12	PFAAP5	phosphonoformate immuno-associated protein 5	NM_033111	10443	31	1	-0.177998	-0.448015	-0.376721	-0.542652	-0.285157	-0.402098	-0.445411	-0.511714	-0.726435	-0.490326	-0.350099	-0.401363	-0.332076	-0.440916	-0.329308	-0.482316	-0.024453	-0.510484	-0.217722	-0.469485	-0.976153	-0.752072	-0.813037
HUXP1200D01	FST	follistatin	BI862529	10468	31	1	-0.208416	-0.450145	-0.316328	-0.407431	-0.279523	-0.288936	-0.30589	-0.192707	-0.409054	-0.317566	-0.341135	-0.309791	-0.477928	-0.461026	-0.448617	-0.413079	-0.508931	-0.509075	-0.459243	-0.550916	-0.669946	-0.39079	-0.598667
HUXP1170C08	IPO7	importin 7	H03344	10527	31	1	-0.300509	-0.34173	-0.319542	-0.356221	-0.181066	-0.217591	-0.254183	-0.296617	-0.347923	-0.212124	-0.0888093	0	-0.270619	-0.569736	-0.431488	-0.581009	-0.52522	-0.416255	-0.510089	-0.447726	-0.842229	-0.708111	-0.456091
HUXP1020E12	RAB10	RAB10, member RAS oncogene family	NM_016131	10890	31	1	-0.438121	-0.107435	-0.194304	-0.409746	-0.419714	-0.531046	-0.285909	-0.572362	-0.393342	-0.228269	-0.256076	-0.173065	-0.428006	-0.682061	-0.429957	-0.672305	-0.604771	-0.432441	-0.479558	-0.617827	-0.549944	-0.352347	-0.332878
HUXP1212F03	SUB1	SUB1 homolog (S. cerevisiae)	NM_006713	10923	31	1	-0.240134	-0.294334	-0.222625	-0.428365	-0.333837	-0.206534	-0.251581	-0.240605	-0.370608	-0.285088	-0.28839	-0.275059	-0.438954	-0.693747	-0.387223	-0.880254	-0.386702	-0.333248	-0.458318	-0.333326	-0.593415	-0.631056	-0.38308
HUXP1166A07	NLRP1	NLR family, pyrin domain containing 1	Hs.104305	22861	31	1	-0.321928	-0.292378	-0.396723	-0.412767	-0.407931	-0.298596	-0.349432	-0.294743	-0.473679	-0.498638	-0.381871	-0.245213	-0.639101	-0.630657	-0.59451	-0.859728	-0.577109	-0.580775	-0.514889	-0.41055	-0.799238	-1.06188	-0.509816
HUXP1067C06	WAPAL	wings apart-like homolog (Drosophila)	NM_015045	23063	31	1	-0.294378	-0.352395	-0.18621	-0.160909	-0.295096	-0.306516	-0.273228	-0.150106	-0.316166	-0.304373	-0.272854	-0.271308	-0.425729	-0.479816	-0.35528	-0.697991	-0.329327	-0.473531	-0.449458	-0.455232	-0.596637	-0.713025	-0.516561
HUXP1064A07	ERC2	ELKS/RAB6-interacting/CAST family member 2	NM_015576	26059	31	1	-0.295193	-0.469879	-0.515369	-0.208387	-0.427261	-0.184876	-0.288903	-0.479141	-0.666704	-0.478995	-0.557025	-0.456475	-0.701894	-0.818686	-0.256727	-0.429034	-0.26342	-0.42623	-0.298659	-0.25119	-0.761597	-0.930209	-0.542532
HUXP1060H01	CCDC69	coiled-coil domain containing 69	NM_015621	26112	31	1	-0.0217844	-0.352302	-0.150529	-0.218539	-0.149194	-0.212495	-0.293984	-0.27077	-0.432894	-0.286767	-0.364132	-0.0653408	-0.407343	-0.725735	-0.47006	-0.728944	-0.643306	-0.65322	-0.557843	-0.528549	-0.978772	-0.951868	-0.596445
HUXP1049B06	INTS6	integrator complex subunit 6	NM_012141	26512	31	1	-0.451563	-0.487916	-0.265239	-0.315958	-0.24664	-0.410188	-0.595424	-0.565141	-0.418953	-0.306103	-0.524955	-0.495632	-0.658963	-0.659857	-0.379848	-0.332394	-0.243114	-0.472488	-0.374603	-0.420332	-0.590199	-0.924449	-0.826668
SHR020061032G02	APEX2	APEX nuclease (apurinic/apyrimidinic endonuclease) 2	NM_014481	27301	31	1	0.107294	-0.197571	-0.149447	-0.150918	-0.365825	-0.218556	-0.25214	-0.457473	-0.483602	-0.324129	-0.346239	-0.910114	-0.26748	-0.265431	-0.442782	-0.398699	-0.369234	-0.667425	-0.402191	-0.605902	-0.55528	-0.635086	-0.652413
HUXP1071D11	C6orf66	chromosome 6 open reading frame 66	NM_014165	29078	31	1	-0.451612	-0.216679	-0.102811	-0.252678	-0.267835	-0.239213	-0.266146	-0.315573	-0.366617	-0.232053	-0.183346	-0.0681119	-0.339058	-0.568126	-0.373856	-0.577606	-0.515028	-0.581486	-0.456722	-0.451509	-0.413059	-0.617469	-0.31058
HUXP1049A06	HERC5	hect domain and RLD 5	NM_016323	51191	31	1	-0.305626	-0.417557	-0.139725	-0.394972	-0.481127	-0.0972972	-0.498251	NaN	-0.510962	-0.217231	-0.350497	-0.402098	-0.512062	-0.179448	-0.57289	-0.758182	-0.321928	NaN	-0.622633	-0.693573	-0.650666	-0.774933	-0.807355
HUXP1061B11	OTUD6B	OTU domain containing 6B	NM_016023	51633	31	1	-0.287802	-0.21541	-0.0995357	-0.31969	-0.415037	-0.354109	-0.381274	-0.421464	-0.420038	-0.163976	-0.00500068	-0.276518	-0.198329	-0.44445	-0.29956	-0.780782	-0.395929	-0.528248	-0.409255	-0.332124	-0.647961	-0.508287	-0.484735
HUXP1061C04	C9orf40	chromosome 9 open reading frame 40	NM_017998	55071	31	1	NaN	0.0750507	0.0374747	-0.157541	-0.307573	NaN	-0.40576	-0.340229	-0.368243	-0.212304	-0.350497	-0.371256	-0.548063	-0.598259	-0.541373	-0.518236	NaN	NaN	-0.255501	-0.34192	-0.560715	-0.666757	-0.396301
HUXP1058F10	TXNDC13	thioredoxin domain containing 13	Hs.169358	56255	31	1	-0.214444	-0.258312	-0.195551	-0.312657	-0.217477	-0.316333	-0.167727	-0.250227	-0.280108	-0.0959244	-0.242857	-0.640004	-0.567773	-0.607683	-0.564785	-0.634716	-0.437877	-0.554968	-0.488578	-0.612977	-0.687578	-0.663818	-0.696423
HUXP1164C09	DUSP22	dual specificity phosphatase 22	NM_020185	56940	31	1	-0.243553	-0.423785	-0.339201	-0.515362	-0.497847	-0.368077	-0.372799	-0.124809	-0.468569	-0.512531	-0.332852	-0.182949	-0.551134	-0.667836	-0.484196	-0.657256	-0.628836	-0.570059	-0.423916	-0.490558	-0.663348	-0.827901	-0.469625
HUXP1065A03	C2orf33	chromosome 2 open reading frame 33	NM_020194	56947	31	1	-0.173065	-0.387226	-0.441372	-0.349514	-0.181113	-0.177787	-0.471824	-0.604459	NaN	-0.332844	-0.191299	-0.321928	-0.649207	-0.766043	NaN	-0.463656	-0.450661	-0.399096	-0.401554	-0.219566	-0.495603	-0.350497	-0.439595
HUXP1030E04	ALG12	asparagine-linked glycosylation 12 homolog (S. cerevisiae, alpha-1,6-mannosyltransferase)	NM_024105	79087	31	1	-0.247864	-0.110614	-0.41316	-0.11918	-0.176601	0.0353745	-0.0456816	-0.167002	-0.313063	-0.304609	-0.35539	-0.25005	-0.601444	-0.559351	-0.362508	-0.569884	-0.44906	-0.465042	-0.495316	-0.353522	-0.53531	-0.746532	-0.38791
HUXP1054H04	RAB33B	RAB33B, member RAS oncogene family	NM_031296	83452	31	1	-0.0895724	-0.382352	-0.137504	-0.327805	-0.164912	-0.154938	-0.209873	-0.0515591	-0.279005	-0.341544	-0.423777	-0.243905	-0.445929	-0.78654	-0.650241	-0.636484	-0.697098	-0.544497	-0.612907	-0.580129	-0.964667	-0.583387	-0.568172
HUXP1206A11	PHYHIPL	phytanoyl-CoA 2-hydroxylase interacting protein-like	NM_032439	84457	31	1	NaN	-0.120681	-0.219313	NaN	-0.213404	-0.247928	-0.0906025	-0.0462937	NaN	-0.336283	-0.349235	-0.260063	-0.618129	-0.288798	-0.18484	-0.595304	-0.485427	NaN	-0.29956	-0.36257	-0.671051	-0.579668	-0.545434
HUXP1101D12	USMG5	upregulated during skeletal muscle growth 5 homolog (mouse)	NM_032747	84833	31	1	-0.311805	-0.154863	-0.209286	-0.463386	-0.349194	-0.416744	-0.393898	-0.36804	-0.438877	-0.423504	-0.423577	-0.211092	-0.56166	-0.831268	-0.51988	-0.952063	-0.525743	-0.500858	-0.593149	-0.442883	-0.928619	-0.634704	-0.610438
HUXP1064F02	LRRCC1	leucine rich repeat and coiled-coil domain containing 1	NM_033402	85444	31	1	-0.153805	-0.126448	-0.139163	-0.674424	-0.479168	NaN	-0.403897	-0.321928	-0.185867	-0.138706	0	-0.827819	-0.541075	-0.621488	-0.523562	-0.652939	NaN	NaN	-0.660064	-0.332575	-0.743027	-0.63005	-0.896907
HUXP1189E02	MGC4677	hypothetical protein MGC4677	Hs.446688	112597	31	1	-0.299392	0.0735767	-0.309803	-0.137885	-0.177831	-0.0200072	0.0456782	-0.128178	-0.231441	-0.414142	-0.273647	-0.403499	-0.471096	-0.536373	-0.40275	-0.824608	-0.553229	-0.456418	-0.526333	-0.429116	-0.808987	-0.905717	-1.07074
HUXP1012G07	ZNF664	zinc finger protein 664	NM_152437	144348	31	1	0.0758158	-0.156058	-0.227321	-0.0551416	-0.413251	-0.228106	-0.285859	-0.515157	-0.430952	-0.098085	-0.149701	-0.383329	-0.675113	-0.573613	-0.424967	-0.498897	-0.759796	-0.592657	-0.55901	-0.634265	-0.564942	-0.716207	-0.48035
HUXP1059D11	ALS2CR13	amyotrophic lateral sclerosis 2 (juvenile) chromosome region, candidate 13	NM_173511	150864	31	1	-0.309104	-0.30841	-0.184783	-0.165678	-0.0532982	-0.103093	-0.255257	-0.201634	-0.687532	NaN	-0.2367	-0.368867	-0.496798	-0.876068	-0.857396	-1.01159	-0.560715	-0.405992	-0.5764	-0.767637	-0.968839	-0.449307	-0.649411
HUXP1056A02	FAM122B	family with sequence similarity 122B	NM_145284	159090	31	1	-0.295456	-0.256174	-0.268355	-0.177132	-0.257981	-0.235331	-0.230746	-0.326203	-0.42711	-0.287175	-0.19885	-0.498069	-0.691715	-0.770794	-0.371589	-0.53776	-0.482848	-0.230973	-0.392732	-0.366038	-0.561251	-0.62136	-0.414783
HUXP1109F07	C14orf147	chromosome 14 open reading frame 147	NM_138288	171546	31	1	-0.185654	-0.375674	-0.131699	-0.276108	-0.1641	-0.244331	-0.22483	-0.03993	-0.316308	-0.322308	-0.454388	-0.487198	-0.354434	-0.68319	-0.614546	-0.499641	-0.66037	-0.521205	-0.513399	-0.575115	-0.575698	-0.452867	-0.498334
HUXP1077A02	ADA	adenosine deaminase	NM_000022	100	32	1	-0.223176	-0.445087	-0.325345	-0.544729	-0.189885	-0.247674	-0.3178	-0.171543	-0.142958	-0.11832	-0.471306	-0.128065	-0.416424	-0.736966	-0.343699	-0.331206	-0.340289	-0.236298	-0.295275	-0.0356239	-0.571804	-0.421243	-0.043458
HUXP1160H08	ADCY7	adenylate cyclase 7	NM_001114	113	32	1	-0.0877956	-0.0353331	-0.238056	-0.0204062	-0.203909	-0.161281	-0.186963	-0.24912	-0.393664	-0.261086	-0.106915	-0.232493	-0.417727	-0.286757	-0.205283	-0.335242	-0.260063	-0.126264	-0.0745745	-0.153936	-0.603483	-0.534708	-0.43535
HUXP1118G05	AHR	aryl hydrocarbon receptor	NM_001621	196	32	1	-0.0612472	-0.206205	-0.213445	-0.314315	-0.231947	-0.207641	-0.149576	-0.355188	-0.211269	-0.238865	-0.222392	0.0538227	-0.232131	-0.158611	-0.338687	-0.249901	-0.10253	-0.37895	-0.176066	-0.292063	-0.583238	-0.6192	-0.358172
HUXP1078F06	BNIP3L	BCL2/adenovirus E1B 19kDa interacting protein 3-like	NM_004331	665	32	1	-0.147382	-0.34406	-0.296718	-0.342281	-0.0817539	-0.108422	-0.112151	-0.119024	-0.143172	-0.14274	-0.288125	-0.24127	-0.407754	-0.388565	-0.345624	-0.411678	-0.200427	-0.129169	-0.294404	-0.180572	-0.379135	-0.468387	-0.257415
HUXP1020G03	C11orf10	chromosome 11 open reading frame 10	NM_014206	746	32	1	-0.176624	-0.175216	-0.272398	-0.325278	-0.233319	-0.178267	-0.323529	-0.339913	-0.322352	-0.259123	-0.355258	-0.0804413	-0.314919	-0.35358	-0.208108	-0.262451	-0.331075	-0.168061	-0.149033	-0.121211	-0.492819	-0.34912	-0.083485
HUXP1050F05	CALD1	caldesmon 1	NM_033157	800	32	1	-0.332043	-0.285668	-0.264237	-0.130286	-0.0557442	0.0985362	0.0490441	-0.0162038	-0.204688	-0.337201	-0.445294	-0.297986	-0.514516	-0.293479	-0.248586	-0.437834	-0.34244	-0.359075	-0.504896	-0.309123	-0.510265	-0.60398	-0.32264
HUXP1056B07	CAPZA1	capping protein (actin filament) muscle Z-line, alpha 1	NM_006135	829	32	1	-0.230505	-0.200427	-0.252881	-0.31122	-0.172927	-0.156705	-0.346325	-0.247276	-0.187933	-0.200063	-0.183243	-0.0270755	-0.306047	-0.397708	-0.294917	-0.478137	-0.369386	-0.173043	-0.146194	-0.222097	-0.503185	-0.493481	-0.309776
HUXP1102B08	COL4A5	collagen, type IV, alpha 5 (Alport syndrome)	NM_033381	1287	32	1	-0.204325	-0.211042	-0.346989	-0.0493498	-0.0996973	0.120966	0.0666573	-0.331769	-0.302532	-0.32412	-0.326478	-0.374741	-0.520202	-0.422139	-0.409682	-0.528206	-0.130043	-0.388381	-0.420545	-0.433403	-0.552327	-0.556629	-0.411164
HUXP1155G11	CTBS	chitobiase, di-N-acetyl-	NM_005274	1486	32	1	-0.339732	-0.205296	-0.382828	-0.171028	-0.234045	-0.190885	-0.289113	-0.399263	-0.332621	-0.281046	-0.253419	-0.0636999	-0.327433	-0.30272	-0.171698	-0.37378	-0.100419	-0.151636	-0.054229	0.0686017	-0.31683	-0.453646	-0.1199
HUXP1161G04	CYP2A7	cytochrome P450, family 2, subfamily A, polypeptide 7	NM_000764	1549	32	1	-0.29206	-0.162401	-0.197755	-0.233406	-0.185592	-0.146745	-0.25491	-0.15124	-0.203202	-0.420876	-0.335025	-0.172733	-0.313606	-0.406052	-0.255038	-0.488045	-0.240077	-0.240342	-0.293682	-0.334558	-0.697554	-0.757508	-0.139635
HUXP1109F04	CYP2C9	cytochrome P450, family 2, subfamily C, polypeptide 9	NM_000771	1559	32	1	-0.230566	-0.412401	-0.182828	-0.298146	-0.274014	-0.219192	-0.107419	0.167266	-0.42453	-0.306054	-0.446241	-0.323973	-0.469485	-0.374341	-0.452512	-0.401117	-0.367111	-0.313751	-0.382044	-0.447191	-0.63743	-0.244612	-0.536622
SHR020061032G04	DBI	diazepam binding inhibitor (GABA receptor modulator, acyl-Coenzyme A binding protein)	NM_020548	1622	32	1	-0.0780025	-0.199879	-0.317355	-0.491536	-0.162153	-0.0777752	-0.0450524	-0.231478	-0.0721047	-0.239443	-0.240678	-0.282282	-0.302169	-0.209099	-0.298349	-0.468844	-0.167566	-0.262821	-0.19685	-0.339486	-0.595822	-0.645011	-0.473862
HUXP1060G05	DPYSL2	dihydropyrimidinase-like 2	NM_001386	1808	32	1	-0.3266	-0.131865	-0.0999958	-0.0658879	0.0935741	-0.121464	-0.397071	-0.0949965	-0.163058	-0.376148	-0.239892	-0.299054	-0.189478	-0.421216	-0.283307	-0.218424	-0.108376	-0.269518	-0.03575	-0.505465	-0.78136	-0.526069	-0.974313
HUXP1183C05	DYRK1A	dual-specificity tyrosine-(Y)-phosphorylation regulated kinase 1A	NM_101395	1859	32	1	-0.204358	-0.250626	-0.337633	-0.391509	-0.0962153	0.100929	-0.0638151	-0.121788	-0.387023	-0.0588937	-0.230708	-0.136635	-0.0824622	-0.687532	-0.0869833	-0.199841	0.0252373	-0.234465	-0.2144	-0.277908	-0.655352	-0.820591	-0.454032
HUXP1022H02	ECT2	epithelial cell transforming sequence 2 oncogene	NM_018098	1894	32	1	-0.3106	-0.119921	-0.0520259	-0.374291	-0.295233	-0.0931094	-0.135672	-0.264862	-0.461134	-0.23816	-0.156814	-0.313581	-0.389476	-0.233888	-0.159996	-0.478349	-0.201453	-0.326981	-0.40817	-0.370238	-0.639118	-0.635134	-0.368835
HUXP1064C04	EDG1	endothelial differentiation, sphingolipid G-protein-coupled receptor, 1	NM_001400	1901	32	1	-0.224497	-0.420188	-0.250768	-0.0271642	0.0111024	0.0816838	-0.0151989	-0.126179	-0.116982	-0.192343	-0.292984	-0.204989	-0.426911	-0.522064	-0.158941	-0.448846	-0.283418	-0.170943	-0.394593	-0.249886	-0.39539	-0.409925	-0.448631
HUXP1155E09	EHHADH	enoyl-Coenzyme A, hydratase/3-hydroxyacyl Coenzyme A dehydrogenase	NM_001966	1962	32	1	-0.16113	-0.184506	-0.213419	-0.240551	-0.225287	-0.237686	-0.236617	-0.0525477	-0.0903224	-0.211273	-0.325253	-0.0553065	-0.314223	-0.291604	-0.0469534	-0.273796	-0.2478	-0.0134265	-0.285425	-0.424649	-0.741913	-0.873574	-0.311785
HUXP1109D10	FYN	FYN oncogene related to SRC, FGR, YES	NM_153047	2534	32	1	-0.286828	-0.194322	-0.236067	-0.152003	-0.212286	-0.125531	-0.138676	-0.138355	-0.136476	-0.328172	-0.25018	-0.0923451	-0.321928	-0.203076	-0.051859	-0.169925	-0.112525	-0.263034	-0.23349	-0.191048	-0.557057	-0.55541	-0.361647
HUXP1057A02	GMPR	guanosine monophosphate reductase	NM_006877	2766	32	1	-0.229189	-0.353657	-0.381276	-0.11931	-0.330921	-0.279624	-0.235523	-0.274014	-0.44781	-0.411338	-0.502534	-0.267086	-0.557717	-0.58849	-0.0588787	-0.362624	-0.194769	-0.189832	-0.279109	-0.0689991	-0.598837	-0.627685	-0.175393
HUXP1122F06	GYS2	glycogen synthase 2 (liver)	NM_021957	2998	32	1	-0.0943274	0.163886	-0.2151	-0.315139	0.117695	-0.17568	-0.505779	-0.171422	-0.222392	-0.521698	-0.377948	0.00737953	-0.893834	-0.636765	-0.0297473	-0.503766	-0.0721498	NaN	-0.303942	-0.0503735	-0.72482	-0.783376	-0.242134
HUXP1117F07	H3F3A	H3 histone, family 3A	Hs.546259	3020	32	1	-0.380999	-0.306462	-0.210333	-0.215122	-0.219215	-0.172794	-0.13675	-0.270452	-0.202504	-0.217347	-0.274263	-0.0529914	-0.276709	-0.625535	-0.128428	-0.317502	-0.136168	-0.13179	-0.0713595	-0.270305	-0.389417	-0.450128	-0.241987
HUXP1069H06	HAGH	hydroxyacylglutathione hydrolase	NM_005326	3029	32	1	-0.289507	-0.0132358	-0.589624	-0.325912	-0.0691836	-0.229026	-0.125937	-0.228941	-0.559872	-0.392317	-0.115477	-0.265239	-0.270398	-0.251539	-0.315502	-0.412782	-0.191048	-0.419539	-0.00866486	-0.167644	-0.296982	-0.376969	-0.252187
HUXP1052F04	HHEX	homeobox, hematopoietically expressed	NM_002729	3087	32	1	-0.213109	-0.307008	-0.434403	-0.055614	-0.0108392	0.0378682	-0.0742009	-0.195771	-0.425022	-0.46158	-0.257601	-0.0219518	-0.448389	-0.319532	-0.314414	-0.517937	-0.279178	-0.266907	-0.23497	-0.164603	-0.579212	-0.615404	-0.37087
HUXP1103B03	HLA-DQA1	major histocompatibility complex, class II, DQ alpha 1	NM_002122	3117	32	1	-0.116193	-0.0816838	-0.276739	-0.145198	-0.233287	-0.284143	-0.135947	-0.462734	-0.180572	-0.196065	-0.164907	-0.246837	-0.223042	-0.357344	-0.356144	-0.437809	-0.320573	-0.205225	-0.13935	-0.15678	-0.412939	-0.554266	-0.370982
HUXP1069A06	HMGB1	high-mobility group box 1	NM_002128	3146	32	1	-0.258545	-0.360475	-0.435566	-0.157292	-0.356818	-0.101916	-0.174115	-0.479046	-0.482563	-0.329797	-0.34774	-0.226394	-0.414786	-0.514149	-0.0403795	-0.0565096	-0.157163	-0.133417	-0.0447075	-0.148226	-0.393461	-0.488518	-0.353535
HUXP1179C11	KIF11	kinesin family member 11	NM_004523	3832	32	1	-0.0874628	-0.197511	-0.247928	-0.219781	-0.266646	-0.0341482	-0.280522	-0.0354053	-0.19592	-0.241889	-0.429988	-0.130397	-0.170885	-0.267622	-0.015513	0.0717907	-0.481869	-0.14439	-0.131996	-0.179448	-0.40632	-0.5603	-0.415037
HUXP1059A09	LTA4H	leukotriene A4 hydrolase	NM_000895	4048	32	1	-0.180992	-0.00708942	-0.219907	-0.233364	-0.0554951	-0.153545	-0.145117	-0.344335	-0.41997	-0.255257	-0.161665	0.0423463	-0.417788	-0.472262	-0.160891	-0.460289	-0.316608	-0.429168	-0.300743	-0.238328	-0.672877	-0.511161	-0.356144
HUXP1173C09	SMAD2	SMAD family member 2	Hs.12253	4087	32	1	-0.306821	-0.490326	-0.423982	-0.272755	-0.26096	-0.135564	-0.108007	-0.0799851	-0.188109	-0.274306	-0.416775	-0.112005	-0.562142	-0.357813	-0.346684	-0.371691	-0.341789	-0.295027	-0.33155	-0.257496	-0.72526	-0.624403	-0.392178
SHR020061005F01	NDUFA4	NADH dehydrogenase (ubiquinone) 1 alpha subcomplex, 4, 9kDa	NM_002489	4697	32	1	-0.266182	-0.196782	-0.253878	-0.520757	-0.275226	-0.111652	-0.293663	-0.25609	-0.110534	-0.299963	-0.263749	0.138661	-0.261745	-0.359854	-0.662813	-0.334741	0.0127724	-0.0164612	0.161997	-0.337669	-0.655352	-0.477354	-0.420265
HUXP1116B04	NDUFB3	NADH dehydrogenase (ubiquinone) 1 beta subcomplex, 3, 12kDa	NM_002491	4709	32	1	-0.220037	-0.16796	-0.258602	-0.275463	-0.198847	-0.176595	-0.258587	-0.34409	-0.291927	-0.269575	-0.254412	-0.0833904	-0.415394	-0.476713	-0.295287	-0.500669	-0.297617	-0.154962	-0.172415	-0.109466	-0.33178	-0.490547	-0.0464576
HUXP1064B10	NDUFB4	NADH dehydrogenase (ubiquinone) 1 beta subcomplex, 4, 15kDa	NM_004547	4710	32	1	-0.350203	-0.372671	-0.236939	-0.154461	-0.241493	-0.205225	-0.300761	-0.395485	-0.149586	-0.289507	-0.31305	0.0886793	-0.454206	-0.31774	-0.157442	-0.179473	-0.181026	-0.123343	-0.119988	-0.0479731	-0.54133	-0.172364	-0.272834
HUXP1165F01	NDUFS4	NADH dehydrogenase (ubiquinone) Fe-S protein 4, 18kDa (NADH-coenzyme Q reductase)	NM_002495	4724	32	1	-0.174874	-0.235908	-0.294285	-0.328623	-0.198829	-0.115477	-0.230897	-0.163239	-0.260514	-0.234352	-0.255421	0.103959	-0.283736	-0.408618	-0.141331	-0.328371	-0.417051	-0.189079	-0.242241	-0.11564	-0.505779	-0.528549	-0.0671142
HUXP1047B01	NIT1	nitrilase 1	NM_005600	4817	32	1	-0.362274	-0.420029	-0.531746	-0.260966	-0.450346	-0.159202	-0.215616	-0.502337	-0.506664	-0.446632	-0.393567	-0.312082	-0.54949	-0.550545	-0.104654	-0.277898	-0.10297	-0.252277	-0.222042	-0.160494	-0.695333	-0.775927	-0.44066
HUXP1043H06	OXA1L	oxidase (cytochrome c) assembly 1-like	Hs.151134	5018	32	1	-0.192285	-0.102149	-0.209205	-0.182653	-0.182377	-0.251257	-0.262095	-0.335728	-0.345497	-0.269043	-0.219364	-0.0634976	-0.391034	-0.497405	-0.332716	-0.433174	-0.415037	-0.301509	-0.359872	-0.274916	-0.758649	-0.779055	-0.465398
HUXP1058C04	PDPK1	3-phosphoinositide dependent protein kinase-1	NM_002613	5170	32	1	-0.201847	-0.255735	-0.367294	-0.0974826	-0.247712	-0.136479	-0.229779	-0.247984	-0.442489	-0.243849	-0.325456	-0.183059	-0.263607	-0.46852	-0.143196	-0.0832736	-0.164529	-0.284313	-0.163161	-0.161575	-0.469145	-0.551168	-0.271563
HUXP1078F04	PLS1	plastin 1 (I isoform)	NM_002670	5357	32	1	-0.375867	-0.360817	-0.08092	-0.293446	-0.163058	NaN	-0.357894	-0.358793	NaN	-0.36059	-0.180572	-0.128898	-0.367209	-0.376969	NaN	-0.294285	-0.300659	NaN	-0.571157	-0.255559	-0.598835	NaN	-0.589716
HUXP1048D11	PROC	protein C (inactivator of coagulation factors Va and VIIIa)	NM_000312	5624	32	1	-0.184585	-0.200627	-0.188345	-0.238251	-0.182203	-0.235306	-0.242959	-0.0381351	-0.213277	-0.231088	-0.24768	-0.0879607	-0.303969	-0.532221	-0.255257	-0.286523	-0.272122	-0.288996	-0.125598	-0.0455626	-0.354182	-0.49715	-0.0874628
HUXP1019F08	HTRA1	HtrA serine peptidase 1	NM_002775	5654	32	1	-0.26467	-0.328612	-0.11146	-0.329648	-0.233364	-0.222332	-0.242389	-0.220126	-0.112664	-0.0942268	-0.251255	-0.0497054	-0.328193	-0.480411	-0.116925	-0.458339	-0.496015	-0.398875	-0.517755	-0.2674	-0.742969	-0.504383	-0.213166
HUXP1116D09	RGS10	regulator of G-protein signalling 10	NM_002925	6001	32	1	-0.231075	-0.206911	-0.194071	-0.222392	-0.186984	-0.186878	-0.257841	-0.294712	-0.287802	-0.172061	-0.262057	-0.0425919	NaN	-0.43108	-0.261563	-0.408206	-0.439744	-0.245652	-0.161665	-0.0229169	-0.340507	-0.417897	0.0789942
HUXP1147B07	RNASE4	ribonuclease, RNase A family, 4	NM_001145	6038	32	1	-0.312939	-0.356756	-0.401638	-0.127034	-0.1752	-0.133436	-0.0377595	-0.227701	-0.23425	-0.321928	-0.413577	-0.0251682	-0.530622	-0.348223	-0.246794	-0.288263	-0.304347	-0.336584	-0.257179	-0.291698	-0.994059	-0.935621	-0.39192
HUXP1206H04	RPA3	replication protein A3, 14kDa	NM_002947	6119	32	1	-0.252552	-0.151206	-0.254451	-0.372239	-0.208874	-0.215469	-0.246687	-0.306622	-0.237864	-0.188933	-0.145142	-0.0202996	-0.395541	-0.337914	-0.313417	-0.419811	-0.146254	-0.212616	-0.147584	-0.248347	-0.560016	-0.572838	-0.396997
SHR020061032G09	RPL22	ribosomal protein L22	NM_000983	6146	32	1	-0.1309	-0.245789	-0.206577	-0.496976	-0.298629	-0.219765	-0.249526	-0.0690343	-0.148905	-0.314829	-0.11969	-0.127545	-0.321361	-0.281048	-0.255722	-0.398565	-0.250622	-0.254064	-0.424926	-0.387289	-0.591624	-0.575115	-0.586808
HUXP1165E06	RPS27	ribosomal protein S27 (metallopanstimulin 1)	NM_001030	6232	32	1	-0.258401	-0.147137	-0.111085	-0.319874	-0.181101	-0.105353	-0.266732	-0.0402737	-0.306088	-0.215228	-0.344926	-0.0624577	-0.404881	-0.550226	-0.294184	-0.528037	-0.198388	-0.345216	-0.327829	-0.251447	-0.670295	-0.711424	-0.278578
HUXP1040B11	SDHC	succinate dehydrogenase complex, subunit C, integral membrane protein, 15kDa	NM_003001	6391	32	1	0.0248212	-0.281906	-0.236206	-0.120143	-0.0837406	-0.0129565	-0.0856843	0.161351	-0.0126714	-0.0338817	-0.38848	0.058926	-0.5513	-0.435552	-0.134323	-0.424087	-0.228232	-0.0232722	-0.365423	-0.158482	-0.693922	-0.357562	-0.423661
HUXP1036B12	ST6GAL1	ST6 beta-galactosamide alpha-2,6-sialyltranferase 1	NM_173216	6480	32	1	0.0189519	-0.167594	-0.155249	-0.17604	-0.0582594	0.0204279	-0.0817566	-0.0632268	-0.29159	-0.188321	-0.206929	-0.163499	-0.30194	-0.300486	-0.274415	-0.329659	-0.0082771	-0.200257	-0.131245	-0.166942	-0.481764	-0.771443	-0.287352
HUXP1081G02	SMARCC2	SWI/SNF related, matrix associated, actin dependent regulator of chromatin, subfamily c, member 2	NM_139067	6601	32	1	0.0344884	-0.263476	-0.113769	0.0149503	-0.286304	-0.239727	-0.159657	-0.33232	-0.2824	-0.367933	-0.37025	-0.28273	-0.265894	-0.189034	-0.33232	0.0782039	-0.197446	-0.203284	-0.352382	-0.258193	-0.333846	-0.417051	-0.5764
HUXP1119A04	SNRPG	small nuclear ribonucleoprotein polypeptide G	NM_003096	6637	32	1	-0.14557	-0.202189	-0.28116	-0.341037	-0.213287	-0.150314	-0.17722	-0.219529	-0.111725	-0.237884	-0.271082	-0.0612701	-0.419406	-0.376627	-0.311024	-0.322808	-0.313554	-0.228383	-0.210962	-0.308833	-0.588456	-0.233652	-0.171407
HUXP1194A08	SON	SON DNA binding protein	NM_032195	6651	32	1	-0.201658	-0.0541224	-0.245338	-0.14289	-0.207723	-0.0849815	-0.0259294	-0.0573662	-0.0999153	-0.26583	-0.158457	-0.301193	-0.494663	-0.423675	-0.134129	-0.18562	-0.193823	-0.184311	-0.0444902	-0.840907	-0.538693	-0.585125	-0.421601
HUXP1178H09	SPAST	spastin	NM_014946	6683	32	1	-0.0249669	-0.304125	-0.250233	-0.403306	-0.18479	-0.100357	-0.114707	-0.200607	-0.172119	-0.156808	-0.411024	-0.160177	-0.302563	-0.622917	-0.32567	-0.465809	-0.164896	-0.109731	-0.164584	-0.28486	-0.725991	-0.764148	-0.507563
HUXP1012F11	TAF7	TAF7 RNA polymerase II, TATA box binding protein (TBP)-associated factor, 55kDa	NM_005642	6879	32	1	-0.222392	-0.318923	-0.0791025	-0.0614005	-0.176362	-0.0859732	-0.0953619	-0.316766	-0.310988	-0.445746	-0.328701	-0.0807827	-0.314945	-0.219218	-0.113366	-0.192645	-0.0292119	-0.141356	-0.146579	-0.0394923	-0.436295	-0.530515	-0.279265
HUXP1005A01	TARBP1	Tar (HIV-1) RNA binding protein 1	NM_005646	6894	32	1	0.0641303	-0.179324	-0.449202	-0.0917162	0.0287113	0.165338	-0.118249	-0.279597	-0.362126	-0.347313	-0.651364	-0.324235	-0.437176	-0.526287	-0.280956	-0.476438	-0.421351	-0.111645	-0.271764	-0.0695409	-0.376563	-0.450252	-0.218698
HUXP1042G10	TAT	tyrosine aminotransferase	NM_000353	6898	32	1	-0.215279	-0.428393	-0.384952	-0.263543	-0.237039	-0.113544	-0.134536	-0.218265	-0.415317	-0.360968	-0.346603	-0.271577	-0.419352	-0.405755	-0.265176	-0.27766	-0.193586	-0.290677	-0.254379	-0.30186	-0.472114	-0.468604	-0.390345
HUXP1044F08	THPO	thrombopoietin (myeloproliferative leukemia virus oncogene ligand, megakaryocyte growth and development factor)	NM_199228	7066	32	1	-0.308358	-0.229345	-0.317615	-0.25634	-0.182864	0	-0.0933965	-0.0272729	-0.24731	-0.23078	-0.188947	-0.101052	-0.261881	-0.400153	-0.333657	-0.401165	-0.328501	-0.425484	-0.212907	-0.320041	-0.810029	-0.60238	-0.334419
HUXP1106G06	UBE2G1	ubiquitin-conjugating enzyme E2G 1 (UBC7 homolog, yeast)	NM_003342	7326	32	1	-0.350757	-0.122256	-0.0299792	-0.171837	-0.0853321	-0.168506	-0.316945	-0.39626	-0.348337	-0.206003	-0.269518	0.0984037	-0.253757	-0.39702	-0.28399	-0.360043	-0.407	-0.150492	-0.289867	-0.0943274	-0.584963	-0.557218	-0.31034
HUXP1074H09	XPC	xeroderma pigmentosum, complementation group C	NM_004628	7508	32	1	-0.208534	-0.162374	-0.395098	-0.179457	-0.272748	-0.0857492	-0.104225	-0.0158784	-0.151234	-0.234319	-0.161479	-0.252766	-0.436144	-0.41632	-0.241189	-0.152003	-0.16711	-0.132326	-0.121015	-0.179614	-0.545968	-0.619853	-0.297358
HUXP1102D06	ZNF117	zinc finger protein 117	NM_015852	7670	32	1	0	-0.241929	-0.352516	-0.0495395	-0.165059	NaN	-0.172837	-0.222392	-0.201634	NaN	-0.213404	NaN	-0.245683	-0.20469	-0.344335	-0.567041	-0.373975	NaN	-0.0366418	-0.308122	-0.540568	-0.432959	-0.448204
HUXP1078B12	ENC1	ectodermal-neural cortex (with BTB-like domain)	NM_003633	8507	32	1	-0.186878	-0.113211	-0.062061	-0.0281969	-0.0351894	NaN	-0.400087	-0.373458	-0.260652	-0.22741	-0.463567	-0.0331669	-0.262377	-0.464668	-0.478302	-0.543622	-0.316027	-0.351472	-0.158857	-0.15788	-0.67653	-0.518131	-0.711875
HUXP1067H11	BECN1	beclin 1 (coiled-coil, myosin-like BCL2 interacting protein)	Hs.12272	8678	32	1	-0.146984	-0.1837	-0.259488	-0.220465	-0.128577	-0.116847	-0.251732	-0.0773979	-0.203935	-0.206728	-0.378663	-0.179398	-0.413287	-0.547795	-0.346637	-0.474241	-0.413759	-0.242335	-0.220342	-0.169277	-0.336827	-0.421957	-0.175558
HUXP1042F09	PROZ	protein Z, vitamin K-dependent plasma glycoprotein	NM_003891	8858	32	1	0.31969	-0.271644	-0.123232	-0.0548619	-0.187627	-0.0377197	-0.302563	-0.240051	NaN	-0.238512	-0.372659	-0.0412227	-0.2836	-0.52951	-0.123735	-0.162795	-0.149056	-0.121562	-0.0574855	0.0515303	-0.438121	-0.613645	-0.192645
HUXP1089F06	NOL3	nucleolar protein 3 (apoptosis repressor with CARD domain)	NM_003946	8996	32	1	-0.145995	-0.431488	-0.283279	-0.477958	-0.13727	-0.246018	-0.270025	-0.0762577	-0.0911479	-0.317615	-0.320756	0.0900102	-0.358407	-0.417707	-0.234352	-0.430304	-0.383915	-0.228428	-0.309684	-0.313064	-0.701503	-0.537446	-0.334049
HUXP1074F09	TMSB10	thymosin, beta 10	NM_021103	9168	32	1	-0.0993473	-0.179176	-0.23504	-0.254305	-0.15615	-0.150052	-0.277616	0.0399868	-0.285894	-0.251993	-0.45626	-0.500486	-0.643269	-0.717066	-0.54636	-0.4975	-0.332869	-0.119239	-0.165157	-0.239131	-0.419942	-0.458581	-0.386106
HUXP1066D01	ZMYM4	zinc finger, MYM-type 4	NM_005095	9202	32	1	-0.0166787	-0.319106	-0.294183	-0.0835234	-0.13234	0	-0.0740006	-0.243406	-0.601451	-0.20482	-0.12993	-0.164494	-0.266479	-0.358922	-0.320492	-0.367209	-0.296775	-0.31999	-0.269497	-0.166754	-0.551751	-0.492516	-0.172131
HUXP1104F06	FEZ1	fasciculation and elongation protein zeta 1 (zygin I)	NM_005103	9638	32	1	-0.246161	-0.152837	-0.274507	-0.0121747	-0.180183	-0.10188	-0.014797	-0.246438	-0.31259	-0.108253	-0.179768	-0.266787	-0.386279	-0.373643	-0.102811	-0.157541	-0.208587	-0.172837	-0.185662	-0.0470851	-0.648528	-0.50696	-0.121788
HUXP1037E08	KIAA0355	KIAA0355	NM_014686	9710	32	1	-0.0883559	-0.201634	-0.235103	-0.060121	-0.1976	NaN	-0.253286	NaN	-0.228269	NaN	-0.247218	-0.392317	-0.469485	-0.409763	-0.185867	-0.292782	NaN	NaN	-0.263034	-0.308122	NaN	-0.466781	-0.426265
HUXP1081D11	KIAA0329	KIAA0329	NM_014844	9895	32	1	-0.118899	-0.423629	-0.286075	-0.173888	-0.103756	-0.0107105	0	-0.124588	-0.298005	-0.356667	-0.441974	-0.209453	-0.370818	-0.62033	-0.236537	-0.349942	-0.375156	-0.254421	-0.298188	-0.348409	-0.58945	-0.663475	-0.415675
HUXP1117G09	FAM20B	family with sequence similarity 20, member B	NM_014864	9917	32	1	-0.088421	-0.20999	-0.232229	-0.311327	-0.224616	-0.149588	-0.237362	-0.172744	-0.201348	-0.177102	-0.216625	0.0545377	-0.251687	-0.417744	-0.0409392	-0.452559	-0.132187	-0.187665	-0.270641	-0.21929	-0.698838	-0.463482	-0.290199
SHR020061023B08	TOPORS	topoisomerase I binding, arginine/serine-rich	NM_005802	10210	32	1	-0.357956	-0.128156	-0.373678	NaN	-0.264	-0.138706	0	NaN	-0.148644	-0.306103	-0.0630098	-0.451874	-0.570956	-0.130847	-0.0411052	-0.459879	-0.24952	NaN	-0.509912	-0.538096	-0.588931	-0.683073	-0.309544
HUXP1040E08	CLEC4M	C-type lectin domain family 4, member M	NM_214677	10332	32	1	-0.179056	-0.336856	-0.306912	-0.296026	-0.347604	-0.0828569	-0.190571	0.252228	-0.228701	-0.169925	-0.543985	-0.114459	-0.627824	-0.487337	-0.319937	-0.317896	-0.339975	-0.0972972	-0.4285	-0.256181	-0.726077	-0.488747	-0.638281
HUXP1022B12	YME1L1	YME1-like 1 (S. cerevisiae)	NM_139312	10730	32	1	-0.307908	-0.208436	-0.300587	-0.375058	-0.183099	-0.201221	-0.180572	-0.14527	-0.150025	-0.266258	-0.282166	-0.0390394	-0.302252	-0.215563	-0.141602	-0.23816	-0.487036	-0.432111	-0.169281	-0.298991	-0.572409	-0.367229	-0.419578
HUXP1030B06	TCERG1	transcription elongation regulator 1	NM_006706	10915	32	1	-0.224002	-0.17817	-0.236574	-0.303699	-0.175442	-0.0949756	-0.201802	-0.167615	-0.335555	-0.239555	-0.128043	0.00957333	-0.272103	-0.292478	-0.0628496	-0.371351	-0.122995	-0.244783	-0.330686	-0.156636	-0.666379	-0.718308	-0.350907
HUXP1170E06	SF3A3	splicing factor 3a, subunit 3, 60kDa	CR598789	10946	32	1	-0.298535	-0.235518	-0.429529	-0.283248	-0.231021	0.0907506	0.00539171	-0.21183	-0.366251	-0.346568	-0.449596	-0.306118	-0.557116	-0.647851	-0.345597	-0.474477	-0.0552401	-0.288223	-0.139589	-0.336035	-0.403751	-0.722754	-0.479256
HUXP1074B07	MAP4K1	mitogen-activated protein kinase kinase kinase kinase 1	CR597185	11184	32	1	-0.295167	-0.196653	-0.323033	-0.368387	-0.412149	-0.268648	-0.252318	0.0533734	-0.349206	-0.358048	-0.32987	-0.0328834	-0.458652	-0.330094	-0.364572	-0.231099	-0.353637	-0.383107	-0.29716	-0.307878	-0.706377	-0.788496	-0.417991
HUXP1043D01	LTB4DH	leukotriene B4 12-hydroxydehydrogenase	NM_012212	22949	32	1	-0.225784	-0.291144	-0.159959	-0.302078	-0.14306	-0.197262	-0.148187	-0.0391769	-0.164954	-0.197031	-0.208173	-0.0291823	-0.261268	-0.41853	-0.179641	-0.395209	-0.428762	-0.373032	-0.394863	-0.360426	-0.622586	-0.574186	-0.308801
HUXP1035G02	PAXIP1	PAX interacting (with transcription-activation domain) protein 1	NM_007349	22976	32	1	-0.149266	-0.155889	-0.110228	-0.0379225	-0.161589	0.0302146	-0.0687128	-0.291049	-0.0889614	-0.196629	-0.122543	-0.0677901	-0.486406	-0.280696	-0.359497	-0.442222	-0.352397	-0.16323	-0.240698	-0.120067	-0.602036	-0.471181	-0.419017
HUXP1087G07	KIAA0265	KIAA0265 protein	Hs.520710	23008	32	1	-0.0862244	-0.223335	-0.206577	-0.129451	-0.191426	-0.191868	-0.324037	-0.243669	-0.301065	-0.105264	-0.187203	-0.262613	-0.421568	-0.358315	-0.420927	-0.390241	-0.496777	-0.406214	-0.100727	-0.278226	-0.54143	-0.48944	-0.438502
HUXP1168E09	FAM120A	family with sequence similarity 120A	NM_014612	23196	32	1	-0.228925	-0.29792	-0.191035	-0.161934	-0.331681	-0.241922	-0.306759	-0.329928	-0.428712	-0.322952	-0.14835	-0.15151	-0.424312	-0.4588	-0.418587	-0.629901	-0.525212	-0.390766	-0.26157	-0.133483	-0.378169	-0.566153	-0.348375
HUXP1006E06	KIAA1026	kazrin	NM_015209	23254	32	1	-0.18548	-0.217008	-0.206451	-0.301297	-0.225524	-0.274383	-0.273299	-0.176786	-0.324879	-0.182426	-0.286051	0.156061	-0.219336	-0.304604	-0.139064	-0.323301	-0.174163	-0.217077	-0.1419	-0.142567	-0.545133	-0.399477	-0.357478
HUXP1010F07	ANGEL1	angel homolog 1 (Drosophila)	NM_015305	23357	32	1	-0.173918	-0.242788	-0.203014	-0.19399	-0.149328	-0.159211	-0.273486	-0.149848	-0.306255	-0.176612	-0.254338	0.00818463	-0.256004	-0.415192	-0.288955	-0.298373	-0.213371	-0.253257	-0.220627	-0.257538	-0.79959	-0.679193	-0.328734
HUXP1140B10	SGK3	serum/glucocorticoid regulated kinase family, member 3	NM_013257	23678	32	1	-0.272919	-0.318459	-0.302536	-0.418033	-0.16036	-0.189493	-0.307113	-0.0476967	-0.126468	-0.346016	-0.441552	0.0157748	-0.346278	-0.460451	-0.0984485	-0.16261	-0.292578	-0.330541	-0.204002	-0.273274	-0.85726	-0.850527	-0.303851
HUXP1116G09	C6orf111	chromosome 6 open reading frame 111	AL080186	25957	32	1	-0.187627	-0.134017	-0.456176	-0.127756	-0.425926	0.0995357	-0.18927	-0.346803	-0.284568	-0.116814	-0.157101	-0.402965	-0.245577	-0.248949	0	-0.390459	-0.187627	-0.150243	-0.29956	-0.135352	-0.476438	-0.360998	-0.302563
HUXP1005D12	SPCS1	signal peptidase complex subunit 1 homolog (S. cerevisiae)	NM_014041	28972	32	1	-0.173247	-0.153747	-0.106532	-0.204718	-0.190871	-0.192645	-0.260274	-0.339824	-0.251178	-0.211021	-0.249504	0.0897767	-0.385096	-0.502688	-0.272342	-0.556423	-0.303199	-0.331288	-0.281797	-0.157289	-0.596349	-0.587855	-0.250374
HUXP1048C08	C20orf30	chromosome 20 open reading frame 30	NM_014145	29058	32	1	-0.104566	-0.196963	0.00654879	-0.230877	-0.252896	-0.191322	-0.307938	-0.279154	-0.294843	-0.229026	-0.367305	-0.0790387	-0.396325	-0.418338	-0.320135	-0.31301	-0.25259	-0.181356	-0.185318	-0.298081	-0.454654	-0.468654	-0.445123
HUXP1045A01	G0S2	G0/G1switch 2	NM_015714	50486	32	1	-0.305413	-0.270715	-0.368867	-0.10188	-0.417668	-0.200913	-0.335286	0.110183	-0.330473	-0.291049	-0.208814	-0.123515	-0.441598	-0.852846	-0.361598	-0.434403	-0.458365	-0.298523	0.029344	-0.159199	-0.856473	-0.805678	-0.29457
HUXP1074D12	RPS27L	ribosomal protein S27-like	NM_015920	51065	32	1	-0.360102	-0.258905	-0.180572	-0.321928	-0.338027	-0.275258	-0.311678	-0.229714	-0.199071	-0.336725	-0.347923	-0.156969	-0.296448	-0.525461	-0.47307	-0.422588	-0.355958	-0.0516141	-0.119356	-0.0855942	-0.463868	-0.408404	-0.162508
HUXP1210B11	ZNF706	zinc finger protein 706	NM_016096	51123	32	1	-0.197091	-0.120121	-0.140327	-0.14439	-0.0485698	-0.139145	-0.14439	-0.329873	-0.107506	-0.211055	-0.170705	-0.10835	-0.459812	-0.53981	-0.391083	-0.51038	-0.455679	-0.293832	-0.344206	-0.227887	-0.577309	-0.546403	-0.444417
HUXP1055H01	RAPGEF6	Rap guanine nucleotide exchange factor (GEF) 6	NM_016340	51735	32	1	-0.0763509	-0.160323	-0.0777223	-0.174498	-0.404066	-0.368243	-0.3254	-0.461227	-0.116918	-0.15899	-0.174679	0.0208335	-0.22293	-0.354388	-0.115477	-0.308122	-0.402098	-0.164229	-0.421604	-0.184425	-0.555359	-0.579226	-0.504569
HUXP1038G06	FLJ20254	hypothetical protein FLJ20254	NM_017727	54867	32	1	-0.242978	-0.257619	-0.235348	-0.193367	-0.197834	-0.1507	-0.250958	-0.0676491	-0.141655	-0.250106	-0.220529	-0.107246	-0.388236	-0.330122	-0.28585	-0.412631	-0.404105	-0.43041	-0.522242	-0.330391	-0.694519	-0.601922	-0.310943
HUXP1019G08	CMTM6	CKLF-like MARVEL transmembrane domain containing 6	NM_017801	54918	32	1	-0.155185	-0.201352	-0.0798928	-0.275866	-0.39179	-0.17817	-0.153805	0.0906593	-0.293446	-0.322391	-0.206143	-0.271609	-0.358268	-0.552253	-0.387317	-0.488459	-0.310086	-0.250071	-0.0830098	-0.1842	-0.406296	-0.543396	-0.27709
HUXP1011D06	HCFC1R1	host cell factor C1 regulator 1 (XPO1 dependent)	NM_017885	54985	32	1	-0.202858	-0.369249	-0.345598	-0.148015	-0.191478	-0.080538	-0.146084	-0.0232109	-0.353987	-0.384719	-0.489233	-0.282813	-0.611058	-0.676569	-0.400673	-0.343669	-0.35222	-0.402902	-0.260477	-0.392603	-0.478341	-0.480339	-0.370416
HUXP1183H08	CEP27	centrosomal protein 27kDa	NM_018097	55142	32	1	-0.181607	-0.290156	-0.270887	-0.345624	-0.332017	-0.149747	-0.264184	-0.259644	-0.237768	-0.162157	-0.2367	-0.0514468	-0.443348	-0.596219	-0.286939	-0.469485	-0.512554	-0.301827	-0.431383	-0.39776	-0.569649	-0.484658	-0.372156
HUXP1082H06	RCBTB1	regulator of chromosome condensation (RCC1) and BTB (POZ) domain containing protein 1	NM_018191	55213	32	1	-0.115477	-0.165059	-0.130584	-0.0776794	-0.111645	NaN	-0.177538	-0.39486	-0.439984	-0.28744	-0.306661	-0.152899	-0.326406	-0.44395	-0.112475	-0.342733	-0.185867	-0.119053	-0.284303	0.00777735	-0.385122	-0.44231	-0.0191088
HUXP1056C03	KIF21A	kinesin family member 21A	NM_017641	55605	32	1	-0.169039	-0.391216	-0.382974	-0.190355	-0.144195	0.0193135	-0.0378529	0.109801	-0.264629	-0.278522	-0.230255	-0.0071174	-0.440714	-0.210166	-0.26939	-0.212713	-0.212085	-0.191492	-0.130308	-0.223213	-0.503008	-0.726882	-0.205333
HUXP1042G11	PRR5	proline rich 5 (renal)	NM_181333	55615	32	1	-0.250267	-0.477322	-0.189825	-0.657719	-0.0956833	-0.345329	-0.168642	-0.153157	-0.347923	-0.222392	-0.415037	-0.22129	-0.346325	-0.269367	-0.378512	-0.131245	-0.331039	-0.28886	-0.226771	-0.303513	-0.38773	-0.659925	-0.387452
HUXP1061C06	ZCD1	zinc finger, CDGSH-type domain 1	NM_018464	55847	32	1	-0.246519	-0.0973191	-0.159363	-0.182853	-0.210824	-0.176272	-0.286672	-0.14648	-0.254237	-0.25838	-0.18737	0.0568745	-0.219274	-0.306734	-0.162667	-0.539948	-0.225772	-0.371221	-0.41471	-0.322187	-0.483375	-0.470451	-0.282084
HUXP1002E03	KCNK12	potassium channel, subfamily K, member 12	NM_022055	56660	32	1	-0.0410068	-0.0908511	-0.202817	-0.209901	-0.0755787	-0.0474787	-0.0453715	-0.0347654	-0.307166	-0.289172	-0.115551	-0.161855	-0.363103	-0.435473	-0.404106	-0.427658	-0.381646	-0.240142	-0.181679	-0.103748	-0.491821	-0.497928	-0.288609
HUXP1023C03	PCNP	PEST proteolytic signal containing nuclear protein	NM_020357	57092	32	1	-0.178899	-0.243652	-0.099257	-0.343199	-0.198288	-0.2264	-0.27012	-0.086019	-0.222392	-0.262949	-0.321001	-0.355305	-0.322608	-0.351862	-0.190024	-0.281839	-0.283735	-0.318133	-0.266827	-0.379006	-0.6282	-0.541223	-0.430341
HUXP1064C06	ZNF608	zinc finger protein 608	NM_020747	57507	32	1	-0.40449	-0.369593	-0.212153	-0.174656	0.185804	0.188874	0.043974	-0.0360848	-0.46005	-0.391673	-0.51448	-0.15333	-0.552527	-0.770276	-0.313852	-0.514754	-0.121118	-0.372268	-0.260012	-0.378438	-0.711467	-0.81587	-0.582454
HUXP1078G06	ZNF335	zinc finger protein 335	NM_022095	63925	32	1	-0.169172	-0.285722	-0.121354	-0.0970987	-0.130669	-0.064572	-0.345891	0.011588	-0.106915	-0.0979264	-0.258369	-0.0498103	-0.22174	-0.753488	-0.114333	-0.343853	-0.0686038	0.116324	-0.14666	-0.132392	-0.53842	-0.470451	-0.514573
HUXP1071E12	MPPE1	metallophosphoesterase 1	NM_023075	65258	32	1	-0.350263	-0.292033	-0.299446	-0.416754	-0.200515	-0.189089	-0.329728	-0.131245	-0.33114	-0.278558	-0.320581	0.0516621	-0.297714	-0.554056	-0.202756	-0.231438	-0.25258	-0.206451	-0.111508	-0.152996	-0.718703	-0.651248	-0.383605
HUXP1024G03	PDCL3	phosducin-like 3	NM_024065	79031	32	1	-0.14893	-0.221567	-0.144055	-0.394944	-0.123797	-0.11569	-0.16607	-0.236632	-0.0735497	-0.198032	-0.303128	0.0164683	-0.370362	-0.235506	-0.175976	-0.418475	-0.246062	-0.290996	-0.321766	-0.170685	-0.528268	-0.752936	-0.133055
HUXP1005B11	C7orf23	chromosome 7 open reading frame 23	NM_024315	79161	32	1	-0.163861	-0.236316	-0.119666	-0.122256	-0.0570717	-0.191242	-0.186297	-0.138808	-0.164931	-0.187893	-0.196387	-0.03583	-0.293388	-0.473207	-0.240377	-0.334553	0.0631569	-0.0384875	-0.0902631	-0.313623	-0.455109	-0.607186	-0.652727
HUXP1123D09	NSBP1	nucleosomal binding protein 1	NM_030763	79366	32	1	-0.273725	-0.376753	-0.33927	-0.134165	-0.183293	-0.191498	-0.0863138	-0.151192	-0.277025	-0.317482	-0.263034	-0.356935	-0.445653	-0.263782	-0.24703	-0.428131	-0.119111	-0.358793	-0.285283	-0.346142	-0.706149	-0.604291	-0.646021
HUXP1033F03	FASTKD1	FAST kinase domains 1	NM_024622	79675	32	1	-0.0816838	-0.11423	-0.148018	-0.0784741	-0.12048	-0.0984037	-0.151118	-0.284977	-0.647427	-0.179768	-0.127834	-0.144719	-0.21782	-0.33527	-0.347554	-0.351043	-0.355937	-0.373124	-0.235306	-0.138898	-0.613914	-0.368829	-0.255803
HUXP1119F09	TBL1XR1	transducin (beta)-like 1X-linked receptor 1	NM_024665	79718	32	1	-0.237205	-0.405413	-0.177741	-0.204215	-0.266557	-0.146052	-0.121562	-0.227868	-0.252643	-0.213501	-0.151526	-0.240628	-0.411249	-0.450624	-0.42586	-0.577487	-0.343145	-0.0410273	-0.341762	-0.125142	-0.499571	-0.498027	-0.320304
HUXP1011A06	SLTM	SAFB-like, transcription modulator	NM_001013843	79811	32	1	-0.241126	-0.328536	-0.328394	-0.126786	-0.259582	0.0577381	-0.0447466	-0.0709386	-0.376235	-0.306303	-0.393176	-0.0354513	-0.435633	-0.396517	-0.296701	-0.298205	-0.202533	-0.216406	-0.125424	-0.22254	-0.647627	-0.846368	-0.288921
HUXP1058G03	CXorf45	chromosome X open reading frame 45	Hs.443061	79868	32	1	-0.143364	-0.302563	-0.530515	-0.401473	0.045324	-0.127112	-0.403633	-0.0179219	-0.239338	-0.388565	-0.209453	0.0907655	-0.3614	-0.105082	-0.18124	0.0415193	-0.222392	-0.254573	-0.197037	-0.313891	-0.4236	-0.433261	-0.409984
HUXP1082E02	THOC7	THO complex 7 homolog (Drosophila)	NM_025075	80145	32	1	-0.257246	-0.191245	-0.263034	-0.21941	-0.252828	-0.200913	-0.310166	-0.246264	-0.234769	-0.228467	-0.165537	-0.123228	-0.370898	-0.571562	-0.431883	-0.635096	-0.454727	-0.390114	-0.319473	-0.138768	-0.491687	-0.412456	-0.133038
HUXP1123F05	CCDC130	coiled-coil domain containing 130	NM_030818	81576	32	1	-0.209741	-0.274015	-0.162005	-0.058377	-0.0671197	-0.0743542	-0.0829175	-0.105646	-0.217542	-0.221922	-0.324616	-0.0826986	-0.410837	-0.367272	-0.0891107	-0.456791	-0.256926	-0.0835714	-0.352229	-0.245756	-0.642448	-0.601489	-0.166069
HUXP1114B09	MS4A8B	membrane-spanning 4-domains, subfamily A, member 8B	NM_031457	83661	32	1	-0.217054	-0.494212	-0.37887	-0.222082	-0.465195	-0.233604	-0.253375	-0.0556632	-0.524587	-0.528816	-0.439237	-0.343111	-0.677102	-0.413932	-0.182427	-0.236085	-0.116156	-0.230665	-0.343316	-0.171977	-0.725693	-0.803684	-0.411124
HUXP1021F09	C10orf22	chromosome 10 open reading frame 22	NM_032804	84890	32	1	-0.301304	-0.167382	-0.32261	-0.338802	-0.369234	-0.237969	-0.255702	-0.440896	-0.136029	-0.199693	-0.272035	-0.168707	-0.571831	-0.566266	-0.343275	-0.449341	-0.487115	-0.506235	-0.235949	-0.288968	-0.606262	-0.507748	-0.256199
HUXP1187B08	LRP11	low density lipoprotein receptor-related protein 11	NM_032832	84918	32	1	-0.0801703	-0.39536	-0.111031	-0.161281	-0.364572	-0.0911479	-0.266075	-0.263034	NaN	-0.336283	-0.212304	-0.268817	-0.319618	-0.183307	-0.125531	-0.317858	NaN	0.0500407	-0.363547	0.162057	-0.666757	-0.544996	-0.546282
HUXP1078B06	TMEM60	transmembrane protein 60	NM_032936	85025	32	1	-0.258734	-0.122256	-0.205051	-0.0183396	-0.353637	-0.307667	-0.356935	-0.465078	-0.171565	-0.341468	-0.363614	-0.359542	-0.441459	-0.393247	-0.27711	-0.383944	-0.0953479	-0.179484	-0.121379	-0.177686	-0.415037	-0.42303	-0.237829
HUXP1051F06	SSX2IP	synovial sarcoma, X breakpoint 2 interacting protein	NM_014021	117178	32	1	-0.137709	-0.245074	-0.205538	-0.14824	-0.213481	-0.0325189	-0.160122	-0.103697	-0.227781	-0.291811	-0.298857	-0.131634	-0.344145	-0.384881	-0.196212	-0.36023	-0.204063	-0.310007	-0.194843	-0.18698	-0.639864	-0.506211	-0.150878
HUXP1163F01	SFXN4	sideroflexin 4	NM_003750	119559	32	1	-0.20589	-0.0764014	NaN	-0.466849	-0.338912	-0.208446	-0.206041	-0.261641	-0.394	-0.253055	-0.106558	-0.111881	-0.388264	-0.333853	-0.249492	-0.538911	-0.340871	-0.421571	-0.342223	-0.212514	-0.480717	-0.563994	-0.44416
HUXP1211C05	ENPP6	ectonucleotide pyrophosphatase/phosphodiesterase 6	NM_153343	133121	32	1	-0.092364	-0.192293	-0.268105	-0.445238	0.0496871	-0.106915	-0.360176	-0.18893	-0.314275	-0.298341	-0.284815	-0.185215	-0.275007	-0.0352611	0.0268666	-0.124806	-0.298762	-0.512375	-0.0632649	-0.33242	-0.707671	-0.471306	-0.232661
HUXP1181E04	FLJ36748	hypothetical protein FLJ36748	NM_152406	134265	32	1	-0.213658	-0.284472	-0.130016	-0.169199	-0.0294939	0.0542528	0.00916	-0.0725125	-0.0730635	-0.249581	-0.200403	-0.0666183	-0.481257	-0.169195	-0.0713174	-0.278057	-0.230298	-0.24952	-0.27684	-0.289949	-0.535836	-0.553057	-0.408885
HUXP1126C06	TMEM167	transmembrane protein 167	Hs.355606	153339	32	1	-0.117997	-0.124121	-0.227536	-0.31999	-0.200078	-0.0848889	-0.245112	-0.301269	-0.229787	-0.334867	-0.134485	-0.180572	-0.327575	-0.329201	-0.27621	-0.399771	-0.316027	-0.227069	-0.353637	-0.256181	-0.533577	-0.534174	-0.369908
HUXP1169E05	ZDHHC20	zinc finger, DHHC-type containing 20	BG571281	253832	32	1	-0.125922	-0.195275	-0.300425	-0.25382	-0.215635	-0.173767	-0.274931	-0.268935	-0.237566	-0.165059	-0.00621852	0.00466138	-0.206451	-0.263034	-0.22733	-0.435215	-0.110323	-0.283793	-0.333216	-0.212246	-0.568049	-0.546282	-0.32044
HUXP1183C04	LOC285636	hypothetical protein LOC285636	NM_175921	285636	32	1	-0.198402	-0.20013	-0.32383	-0.281398	-0.0329564	0.00616977	0.17892	-0.381307	-0.373649	-0.184849	-0.198991	-0.330516	-0.199708	-0.451837	-0.145229	-0.1397	-0.0333862	-0.058951	-0.238824	-0.294424	-0.592825	-0.586451	-0.56589
HUXP1188D06	FAM89A	family with sequence similarity 89, member A	NM_198552	375061	32	1	-0.0491476	-0.525091	0.34034	-0.104227	-0.174874	-0.00617857	0.0487032	-0.225213	NaN	-0.400538	-0.222392	-0.0648511	-0.370368	-0.387023	-0.136573	-0.322651	-0.148863	0.0646091	-0.306161	-0.206451	-0.448921	-0.669459	-0.325027
HUXP1161C12	MED11	mediator of RNA polymerase II transcription, subunit 11 homolog (S. cerevisiae)	NM_001001683	400569	32	1	-0.117251	-0.19241	-0.294873	-0.163215	-0.124959	0.027391	-0.120013	-0.0173885	-0.21537	-0.321344	-0.162369	-0.183226	-0.453026	-0.285373	-0.212369	-0.380341	-0.242196	-0.284626	-0.273161	-0.141631	-0.687344	-0.741981	-0.348414
SHR020061012H07	ATP5F1	ATP synthase, H+ transporting, mitochondrial F0 complex, subunit B1	NM_001688	515	33	1	-0.242257	-0.162083	-0.335603	-0.282943	-0.105346	-0.232124	-0.0305138	-0.320273	-0.188558	-0.131806	-0.0649864	0.150604	-0.2232	-0.251294	-0.209485	-0.564517	-0.200717	-0.214148	-0.258378	-0.164814	-0.622963	-0.442765	-0.286848
SHR020061034A07	BTN1A1	butyrophilin, subfamily 1, member A1	NM_001732	696	33	1	-0.0435893	-0.1105	-0.157101	NaN	0.0336308	-0.0978473	0.111031	0.040642	-0.0901978	-0.159199	-0.216492	0.123989	-0.393914	-0.159871	-0.0506261	-0.172639	-0.0389941	-0.255257	-0.112768	-0.15659	NaN	-0.654671	-0.339089
HUXP1051D07	C6	complement component 6	NM_000065	729	33	1	-0.130061	-0.0138855	-0.143966	-0.0722561	-0.106915	-0.131996	-0.215729	0.091469	-0.269698	-0.27684	-0.0901978	0.0671142	-0.0995357	-0.0778667	-0.153246	-0.163165	-0.0995357	-0.463247	-0.101414	0.014835	-0.739018	-0.501821	-0.096508
HUXP1077A08	COX7C	cytochrome c oxidase subunit VIIc	NM_001867	1350	33	1	-0.111428	-0.101203	-0.0475216	-0.334136	-0.202487	-0.138197	-0.158084	-0.0824987	-0.154355	-0.185825	-0.083999	0.0316072	-0.252826	-0.539276	-0.116574	-0.376077	NaN	-0.136289	-0.124515	-0.173901	-0.531855	-0.733051	-0.202388
HUXP1074H06	DCI	dodecenoyl-Coenzyme A delta isomerase (3,2 trans-enoyl-Coenzyme A isomerase)	NM_001919	1632	33	1	-0.0157482	-0.0783213	-0.111497	0.0874093	-0.0303361	-0.111672	-0.121329	0.0334969	0.0271605	-0.167426	-0.103855	0.146655	-0.0835831	-0.311639	-0.192645	-0.239951	-0.266754	-0.183485	-0.103655	-0.157408	-0.475415	-0.42097	-0.139868
HUXP1104B09	EPAS1	endothelial PAS domain protein 1	NM_001430	2034	33	1	-0.130787	-0.109704	-0.0129391	0.0524674	-0.0134205	NaN	-0.244622	-0.107641	-0.0984037	-0.0625415	0	0.222392	0.0491728	-0.386058	-0.163058	-0.282587	-0.249028	-0.341037	-0.140434	-0.235745	-0.600393	-0.363691	-0.100632
HUXP1051D06	ETV3	ets variant gene 3	NM_005240	2117	33	1	-0.186851	0.139971	-0.0126368	-0.110558	-0.231326	-0.143087	-0.183896	0.0122091	-0.194945	-0.218721	-0.139948	0.0369511	-0.206096	-0.190984	-0.207765	-0.0899894	-0.160465	-0.210988	-0.0742386	-0.0811096	-0.683472	-0.486987	-0.213684
HUXP1013E04	EXT2	exostoses (multiple) 2	NM_207122	2132	33	1	-0.0801332	-0.123851	-0.111061	-0.0901978	-0.00979085	-0.0871493	-0.159596	-0.188386	-0.141619	-0.110111	-0.0345049	-0.029296	-0.0747882	-0.268102	0.0123966	-0.0165693	0.165312	-0.0147634	-0.112317	-0.181016	-0.605524	-0.725288	-0.494765
HUXP1159B12	FNTA	farnesyltransferase, CAAX box, alpha	NM_001018676	2339	33	1	-0.105219	-0.0585439	-0.0608321	-0.0331376	-0.123735	-0.0866544	-0.13852	-0.152851	-0.135754	-0.00787284	-0.0182622	0.213038	-0.216264	-0.138337	0.104303	-0.0446439	-0.0174874	-0.167367	-0.0750411	-0.201761	-0.673814	-0.553787	-0.347177
HUXP1015A04	GALNT1	UDP-N-acetyl-alpha-D-galactosamine:polypeptide N-acetylgalactosaminyltransferase 1 (GalNAc-T1)	NM_020474	2589	33	1	-0.0197904	-0.115256	-0.104735	-0.339958	-0.0994037	-0.0800533	-0.121769	0.0785566	0.0452056	-0.0734121	-0.241698	0.196991	-0.133146	-0.157647	-0.174874	-0.277711	-0.267076	-0.266787	-0.104993	-0.111508	-0.828145	-0.720447	-0.20363
HUXP1033D03	GOLGA1	golgi autoantigen, golgin subfamily a, 1	NM_002077	2800	33	1	-0.275821	-0.149698	-0.217042	-0.0504321	-0.153276	-0.146455	-0.215295	-0.177054	-0.24982	-0.129451	-0.249831	0.0906793	-0.319657	-0.275927	-0.0864275	-0.230627	-0.207502	-0.332995	-0.29777	-0.189462	-0.952123	-0.686675	-0.144005
HUXP1053G10	GRB10	growth factor receptor-bound protein 10	NM_001001550	2887	33	1	-0.0878728	0.0129973	-0.0229611	-0.142892	-0.00901687	0.0599425	-0.128986	-0.204905	-0.519834	-0.498663	-0.132755	0.297905	0.239827	-0.130727	0.00553818	-0.221172	-0.0129391	-0.26566	-0.196467	-0.048363	-0.725561	-0.275634	-0.249172
HUXP1066B09	MR1	major histocompatibility complex, class I-related	NM_001531	3140	33	1	-0.0491875	-0.119739	0.0136426	-0.0307265	-0.048563	-0.109745	-0.0380513	-0.0935568	-0.199033	-0.0950266	-0.116741	0.200103	0.0447152	0.0980552	-0.105467	-0.128324	-0.00360224	-0.311804	-0.178277	-0.238978	-0.619439	-0.426371	-0.0962153
HUXP1073B01	HNRPH1	heterogeneous nuclear ribonucleoprotein H1 (H)	NM_005520	3187	33	1	-0.245666	0.127646	-0.0991718	0.0306584	-0.416756	-0.267984	-0.193119	-0.164197	-0.259964	-0.26121	-0.0333364	-0.00620812	-0.125961	-0.0696965	-0.00485484	-0.352803	-0.0774118	-0.121467	-0.0916616	-0.115165	-0.65257	-0.824514	-0.379389
[truncated: 2,050 more rows]
